# Supplementary material for: The ecomorphology of the shell of extant turtles and its applications for fossil turtles
Source: PeerJ journal article supplement (doi:10.7717/peerj.10490), 2020-12-22

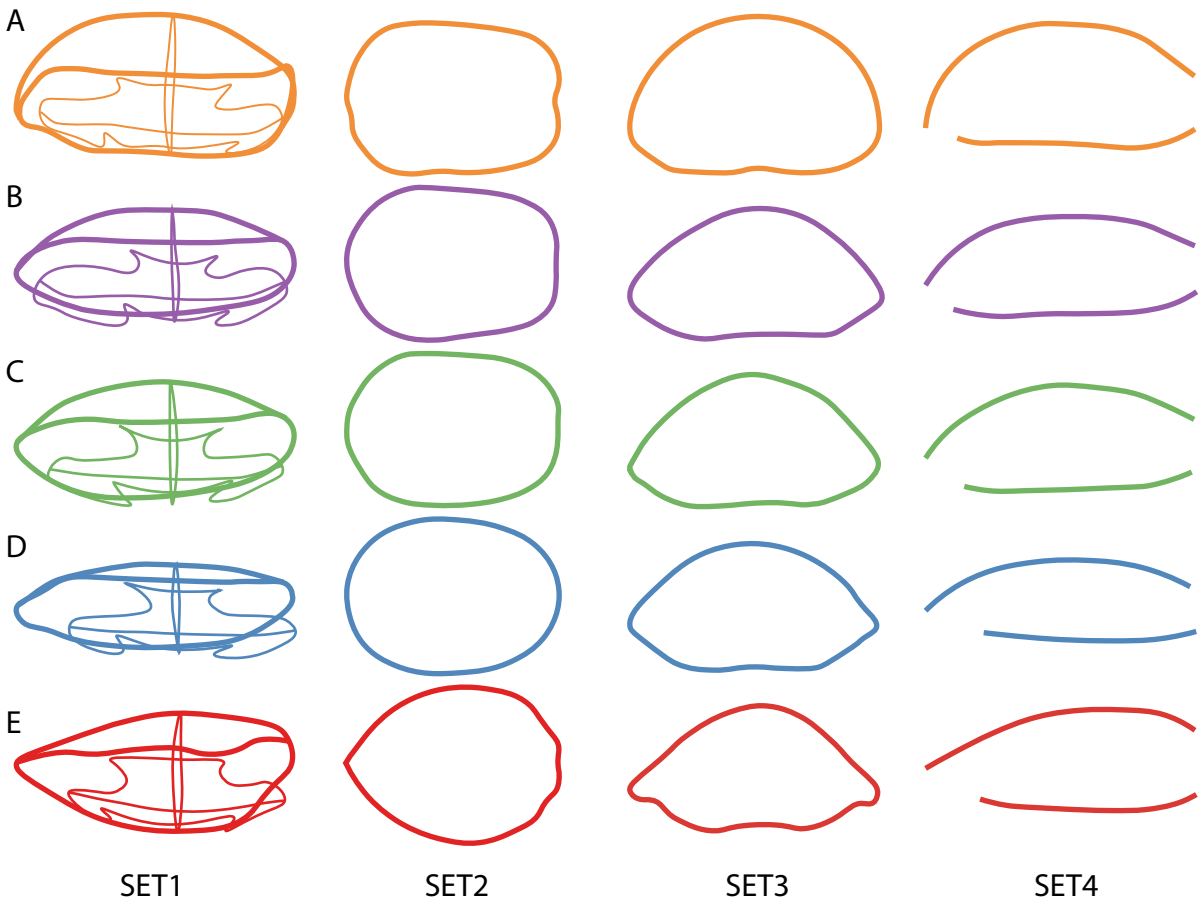

Supplement: FigureS2_LDA_MSHAPE.pdf [file FigureS2_LDA_MSHAPE.pdf]
