# Supplementary material for: The ecomorphology of the shell of extant turtles and its applications for fossil turtles
Source: PeerJ journal article supplement (doi:10.7717/peerj.10490), 2020-12-22

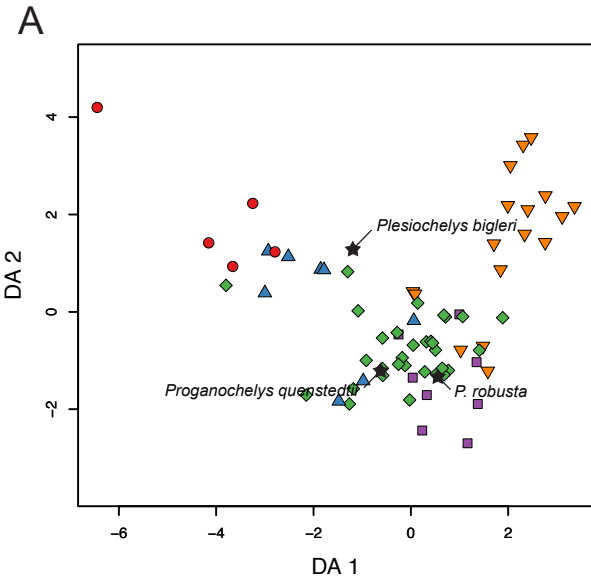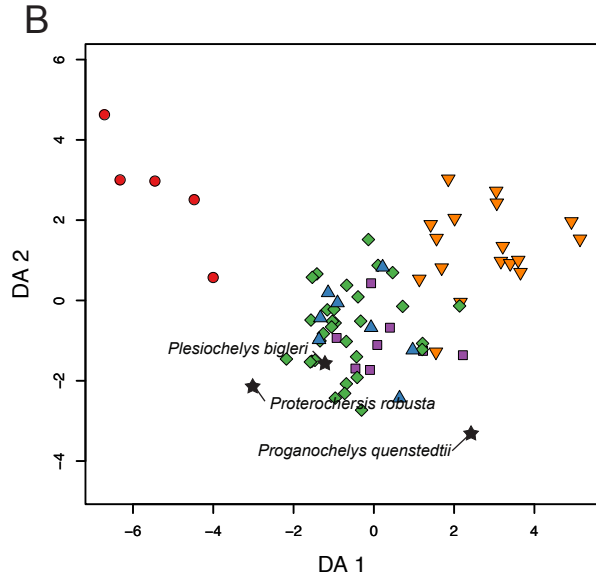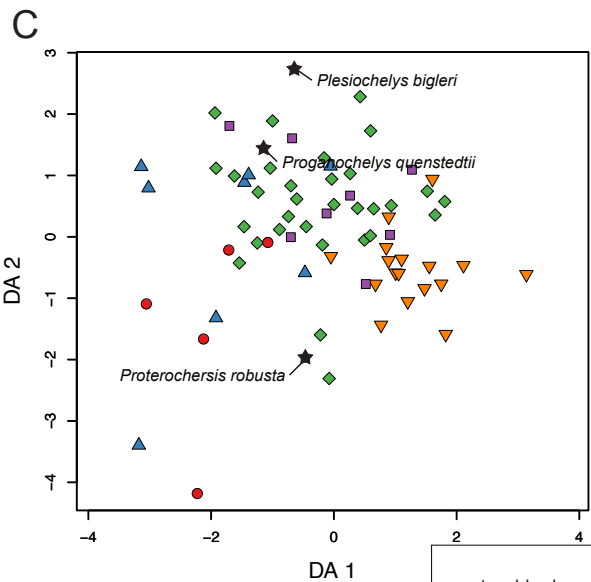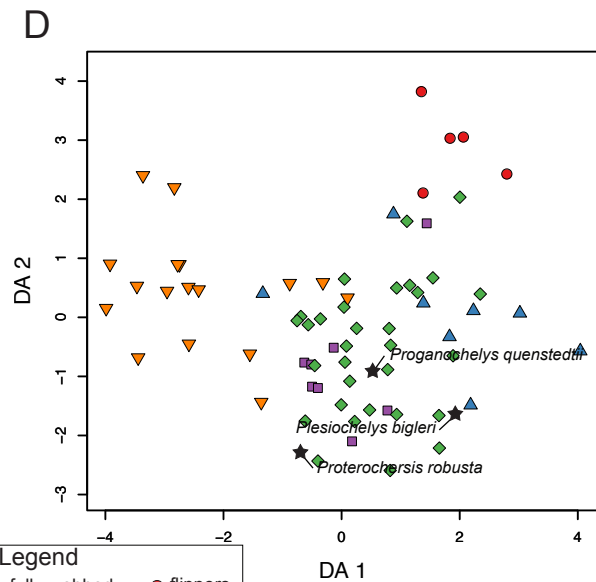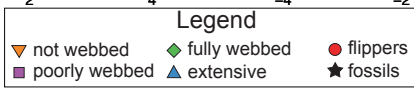

Supplement: FigureS4_pFDA_results_ultrametric.pdf [file FigureS4_pFDA_results_ultrametric.pdf]
