# Supplementary material for: The ecomorphology of the shell of extant turtles and its applications for fossil turtles
Source: PeerJ. 2020 Dec 22;8:e10490. doi: 10.7717/peerj.10490 (PMC7761203; doi:10.7717/peerj.10490)
Supplement: Supplemental Information 10 [file peerj-08-10490-s010.xlsx]

## Sheet: pca_SET1
species	ecology	Comp1	Comp2	Comp3	Comp4	Comp5	Comp6	Comp7	Comp8	Comp9	Comp10	Comp11	Comp12	Comp13	Comp14	Comp15	Comp16	Comp17	Comp18	Comp19	Comp20	Comp21	Comp22	Comp23	Comp24	Comp25	Comp26	Comp27	Comp28	Comp29	Comp30	Comp31	Comp32	Comp33	Comp34	Comp35	Comp36	Comp37	Comp38	Comp39	Comp40	Comp41	Comp42	Comp43	Comp44	Comp45	Comp46	Comp47	Comp48
Dermatemys_mawi	SEA	-0.0446805	-0.0380506	-0.0297386	0.0421093	-0.0405446	0.0461511	-0.0135908	0.00922797	-0.00260434	0.0179781	-0.0209612	0.00714612	-0.00376199	0.0116257	-0.014315	0.00239216	-0.00413198	0.00188725	-0.00481938	0.0135703	-0.00857062	0.00933169	-0.005955	0.00274704	-5.74e-05	-0.000913037	0.00944982	-0.00303202	-0.00918129	0.00233381	0.00213473	-0.00262883	-0.00292743	-0.00284167	0.0022284	0.00585454	0.0074258	-0.00591576	-0.00342457	-0.000321237	-0.00533523	0.00130652	0.000530149	0.002436	0.0043541	0.00227958	-0.00214934	-0.00550792
Staurotypus_triporcatus	SEA	0.0633293	0.0622586	-0.0605585	0.0125105	0.0190447	0.0847025	0.0232242	0.04293	-0.0203235	0.0124774	0.0345297	0.0176442	-0.0169953	-0.0158963	0.00039344	-0.0218401	0.00894142	-0.00796292	-0.00695244	0.00500782	-0.000169554	-0.0039026	-0.00552077	-0.00484598	-0.0136457	0.00174329	-0.00473895	0.00297798	0.00232536	0.0028053	-0.00286902	0.000304746	0.00483277	-0.0103585	0.00311389	0.0038819	-0.00698682	-0.00437576	-0.0011591	-0.00253798	0.00327392	-0.00194677	0.00297287	-0.00801977	0.00304501	0.0020764	-0.00102559	0.00195777
Claudius_angustatus	SEA	0.130864	0.131809	-0.150373	-0.0453719	-0.0120592	-0.0130349	-0.00844811	-0.00696577	-0.00769968	0.0166324	0.0122361	0.0103789	0.0141531	-0.0201728	-0.00600845	0.0286256	-0.00676067	0.00832184	0.0164389	0.00735195	-0.00807906	0.00908841	-0.0069491	0.000994861	0.00586453	-0.00582799	0.0021796	-0.00512729	0.00471454	-0.00497483	-0.00522323	0.00100102	-0.00575386	-0.00236574	-0.00368621	-0.00142945	-0.00525104	-0.00409441	0.00341881	0.00594728	0.000517479	0.00296892	0.00146155	-0.00225545	6.44e-05	-0.00410523	0.000734453	-0.00458342
Sacalia_quadriocellata	SEA	0.0291591	0.0192153	0.0624324	0.0240951	0.0159099	-0.00232422	0.00134619	0.0308776	0.00292456	-0.0085623	-0.0228203	0.021414	-0.00336245	8.33e-05	0.0109645	-0.00344011	0.00614956	0.0171089	-0.0081196	-0.000941742	-0.00765677	0.00154641	-0.00285197	0.00207067	-0.00115079	0.000890146	0.0052135	0.00616432	0.0039483	-0.00389047	0.00284784	0.00723511	-0.00474998	0.00118337	-0.0051614	7.6e-05	0.0017842	-0.00176229	0.00468104	0.00156296	0.00652838	-0.0029171	-0.00133398	0.00217181	0.00222322	-0.00385451	0.00108138	-0.000173878
Mauremys_reevesii	SEA	-0.0532179	0.0142466	-0.0257187	-0.0398531	0.0343653	-0.00725617	-0.0315045	-0.0253932	0.0223966	0.00498501	-0.00070487	0.00326094	0.0178805	-0.00291297	0.00808641	0.00405056	0.00231403	-0.00756684	-0.00199987	0.00658208	-0.00976663	0.00461946	-0.00970848	-0.00752054	-0.00199164	-0.00767043	-0.00323061	0.00121173	0.00504702	0.000872261	0.00187189	-4.77e-05	-1.49e-05	0.00649938	0.00197771	-0.0023212	-0.00279179	0.00243499	-3.75e-06	-0.002748	0.00141635	-0.000327021	-0.00257315	-0.00118073	0.000872144	0.0018679	0.000734512	0.000828156
Apalone_mutica	FUA	0.147815	-0.0936004	0.0476221	0.063701	-0.0277564	0.0327757	0.0448909	0.00358549	0.0209462	0.0348288	-0.0114197	0.0184738	0.00631382	-0.0119642	-0.000733187	0.00639882	-0.0200718	0.00546043	0.00107345	-0.0125743	0.00797015	-0.00493835	0.000575299	-0.00932216	-0.000368601	-0.00828488	-0.00380679	0.00829964	0.00325731	-0.00755408	0.00396278	0.0131689	0.00165922	-0.000484546	0.00768128	-0.00264608	-0.00119478	0.00577502	0.000860924	-0.00359416	-0.00265103	0.00512181	-0.00346121	-0.00144935	0.00208031	0.00144044	-0.00303345	-0.00446907
Pelusios_sinuatus	SET	-0.0718898	-0.00192409	0.0347413	0.00175725	-0.0101912	0.0274535	-0.0379511	-0.0311287	0.00917416	0.0141401	0.0141038	-0.00567175	-0.0117171	-0.0170129	-0.0162819	0.0130122	0.0046785	0.00487816	0.0146044	-0.0110083	0.0107783	-0.000101697	-0.00309725	-0.000110574	0.000138251	0.00153116	-0.00574496	-0.0091667	0.0141701	0.00436157	0.011529	-0.00188131	0.00408844	0.00117576	0.00243932	0.0010385	0.00485763	0.00121443	-0.00278248	0.00640528	0.0081387	-0.0016462	-0.000264911	0.00118114	-0.0034184	0.00212791	0.00183933	-0.000960348
Elseya_novaeguineae	SEA	-0.0380351	-0.0582985	-0.0381912	0.0113864	0.0654823	0.0094692	0.0347001	0.0400672	-0.0128415	0.0349181	-0.012027	-0.00215704	-0.011676	0.00726218	0.00424489	-0.0111814	0.00611488	0.0171691	-0.00454571	-0.00154743	-0.00106232	-0.00306869	-0.00396523	0.00746435	0.00987067	-0.00492429	0.00116876	0.00371179	0.00175298	-0.00339997	-0.00063678	-0.00561854	0.00638422	0.00913957	-0.00462138	-0.00203172	0.000267934	-0.00930664	-0.00641	0.00578144	0.00092588	-0.00532022	-0.000655176	-0.00100928	0.00401637	-0.000736968	-0.00142188	-0.00428524
Chelydra_serpentina	SEA	0.249063	0.0986046	0.0171923	0.074886	-0.0208457	-0.00766155	-0.0130051	-0.0397193	-0.0130536	0.016881	0.0289081	-0.0400307	-0.0164103	0.0280947	0.0167878	0.0116835	0.00415381	-0.00123921	-0.00426677	0.0140419	-5.62e-05	-0.0129349	0.000598645	0.00943381	0.00199849	0.00758757	0.00124974	0.00254129	-0.000316487	-0.0143971	0.00441099	-0.00377842	0.00616844	0.00404934	0.00157559	0.00170963	-0.00281068	0.00209608	0.00146956	-0.000555419	0.00154781	-0.00163617	-0.00125464	0.00192319	0.000375699	0.000218003	0.00197531	0.000975581
Carettochelys_insculpta	FME	0.0287879	0.0512721	0.0168403	0.0271399	-0.0118798	0.03599	0.015817	-0.0677535	-0.00614135	-0.0147865	-0.0335859	0.000501792	-0.0102827	-0.00949109	-0.00410897	0.00481211	-0.00587525	-0.00731297	-0.00827732	-0.00244312	0.00402935	-0.0107594	0.00277182	-0.00620423	-0.00376584	-0.015778	0.00462178	-0.00770321	-0.00943589	0.00052785	-0.0088657	0.00256141	0.00145237	0.00375541	0.00692287	0.00466868	0.00170414	-0.00495797	0.00435931	0.00360668	0.00215563	-0.00334821	-0.00900748	-0.00546763	0.00217662	-0.00107662	0.00323458	0.00255381
Emys_orbicularis	SET	0.0297356	0.0172183	0.0488674	-0.0650738	0.077696	0.0018548	0.00279842	-0.0049452	0.0037821	-0.00622706	-0.0117611	-0.00291736	0.0171187	0.000495055	-0.000206065	0.000313069	-0.00676383	0.00718538	-0.00597945	-0.00557734	-0.00705715	0.000450685	0.0136127	-0.00213809	0.00390686	-0.0015194	0.00360583	9.42e-05	0.00159883	-0.00227718	-0.00321421	0.00129237	0.00191046	-0.00031664	0.00218015	0.0028415	-0.00525299	0.00389831	-0.000306243	0.000811516	0.002273	-0.00207728	0.00406994	-0.00147697	-0.0019592	0.00375666	0.000857051	0.00286323
Pelomedusa_subrufa	SEA	0.0527494	-0.0110505	0.0162261	-0.0165346	-0.00912855	0.0416534	-0.00954709	0.0121888	-0.0144332	0.0263374	-0.0045751	-0.00497432	-0.00962328	-0.00555658	0.00957604	-0.0125994	0.00254913	-0.0323826	0.0127731	-0.0102527	-0.00897382	-0.0060213	0.000722072	-0.00170263	0.00792375	-0.0106508	-0.00643233	0.00262315	-0.00104581	0.000885747	-0.00141928	-0.00701362	-0.00800366	0.00199944	-0.00843593	0.00679507	-0.00730552	0.00363077	0.00364479	-0.00143961	-0.00531237	0.00114602	-0.000609793	0.00161442	-0.00470336	0.001382	0.00330793	-0.00611069
Psammobates_tentorius	TER	-0.0901775	0.0705844	0.0520688	0.0520058	0.0495638	-0.0469397	0.0270888	-0.00238435	0.00613721	0.0202325	-0.0105592	0.0244901	-0.00896875	0.0176084	0.00855453	-0.00447056	0.00451329	0.00543376	0.0113804	-0.000927203	0.0090195	0.0132014	-0.0120535	-0.00341517	-0.014297	-0.0113425	-0.00570704	-0.00380886	-0.00410465	-0.00681313	-0.00052112	-0.00588198	-0.00339242	-0.00383992	0.00598428	0.00200066	-0.00563719	0.00288068	-0.000361993	0.00272875	-0.00302812	-0.00382566	-0.00215315	0.0078491	-0.0056247	-0.00241105	-0.00154477	0.000757164
Homopus_femoralis	TER	-0.0421322	-0.0322638	0.0393186	0.00875436	0.0120631	-0.0285611	0.0213133	0.0251763	-0.028678	-0.00211355	0.018075	0.00412739	-0.00222494	0.0208748	-0.00483421	0.0132208	9.74e-06	0.00457598	0.0160083	-0.00314245	-1.59e-05	0.00323576	0.00108082	-0.00182051	-0.00626548	0.0025548	0.000487412	0.0064238	0.00112639	-0.00261794	-0.0015185	-0.00953404	0.00176646	-0.00662826	0.00711666	-0.00610129	0.00629859	-0.00303126	0.00891204	0.00231009	0.000580393	0.00652286	-0.000122003	-0.0028528	0.00551432	0.00775015	0.00340205	-0.00421781
Kinixys_belliana	TER	-0.0704435	0.00332029	0.0308239	-0.00677743	-0.0192388	-0.0468255	0.0482142	0.0269101	-0.000621631	-0.0227292	0.0296534	-0.00587829	-0.0263269	0.00685574	0.00400404	0.00498012	-0.00994775	0.0109112	-0.0143414	-0.00646532	0.00175527	0.000925242	-0.00121758	-0.0124046	0.00159028	0.00588889	0.00520234	-0.00248395	0.00169235	0.00385382	-0.0106819	-0.00302142	0.0027157	0.00146092	-0.00728528	0.00383817	-0.0083341	-0.000324583	0.00323985	0.000408808	-0.00365441	0.00537904	-0.00366627	0.00213758	0.000872731	0.00511497	-0.00199371	0.00159826
Rafetus_euphraticus	FUA	0.0360383	-0.095826	-0.053601	0.0017707	-0.0104018	-0.00572813	0.0507927	-0.0512322	0.0895021	0.00386563	0.0364845	0.00650829	0.00568578	-0.0207444	0.00813904	-0.00239936	5.36e-05	0.00214569	-0.00639327	-0.0172524	-0.0072225	-0.000372339	0.00363176	0.00337596	-0.00868445	0.00533089	-0.00517153	-0.00589923	-0.00528613	-0.0111079	-0.00323731	-0.00906135	-0.000704534	0.00214375	-0.00126337	0.00473977	0.00683339	-0.00363034	-4.62e-05	0.000320454	0.00105381	0.000866236	0.00510089	0.00366482	-0.00105217	-0.00205402	-0.00073442	0.00112554
Platysternon_megacephalum	SET	0.106176	0.00398051	0.00814427	-0.0322936	0.0367472	0.016901	0.0163364	0.0180537	0.0331203	-0.0443122	-0.00718579	0.00578227	0.0140925	0.0198177	-0.00962459	-0.00967228	-0.0224952	0.0104278	-0.00531965	0.010874	0.00268307	-0.00854961	-0.0106509	-0.0103245	0.0119172	0.00523672	-0.00795389	0.000713524	-0.00604943	0.00542236	-0.00180513	-0.00350529	-0.00102106	-0.00531155	-0.00304907	0.000904965	0.00285623	0.00318617	0.000905473	0.00677355	0.00293375	0.00118203	-0.00166608	-0.00235658	-0.00462816	-0.00388835	0.0017712	-0.000998011
Pelodiscus_sinensis	FUA	0.158893	-0.00407728	0.00508634	-0.0288646	-0.0293832	-0.0599481	0.0520162	-0.0445678	0.012539	0.00888268	-0.0257549	-0.0153826	-0.0211379	0.000591993	-0.00522632	-0.0127686	0.0119378	-0.00717849	-0.0120017	0.00353719	0.0100053	0.00972625	0.00676177	-0.00195452	0.00729863	0.000992753	-0.00327125	0.00106754	0.0118436	0.00864587	0.000579322	-0.00416158	-0.00438414	-0.00950292	0.00388545	-0.0056756	0.00514198	-0.00562121	0.00637472	-0.00271098	-0.00125864	-0.00383303	0.00222603	-0.00130831	-0.000713867	-0.00558247	-0.00138375	-0.00273156
Stigmochelys_pardalis	TER	-0.103675	0.060176	0.0130143	0.0121727	-0.04638	-0.0106568	0.0318374	0.00695213	0.0395122	0.00745591	0.00625144	-0.0122179	0.00454524	-0.00208896	-0.000886642	-0.00433107	0.0101438	0.00665647	0.00984088	0.00925336	0.00597157	0.000822061	-0.00510106	0.00474703	0.0154734	-0.00797749	0.00265513	0.0060464	-0.00792368	-0.00135052	-0.00439107	-0.00250995	-0.00255349	-6.63e-05	0.00293775	-0.00523252	-0.000163926	0.00892994	-0.00341151	-0.00808581	0.00451719	0.00510477	0.00231639	-0.000752414	0.00518665	-0.00315119	0.00369051	0.00481882
Dermochelys_coriacea	FME	-0.12895	-0.0955182	-0.129167	0.0550982	0.0687715	-0.00690743	0.056354	-0.0892299	-0.0507075	-0.0240621	0.0122164	-0.0101515	-0.00606693	-0.0102193	-0.0105622	-0.021914	-0.00817463	-0.00315384	0.0125647	0.00413612	-0.00494681	0.000903466	-0.0144831	0.00510601	0.00606232	0.00195559	0.00587366	0.00238725	-0.000248115	-0.00228663	0.00112647	0.00506726	0.00298255	-0.00260291	-0.000376461	-0.00258064	-0.00013875	0.00623576	0.00179759	0.000760454	0.000244823	-0.00198207	-0.00214236	0.00161053	-0.00149539	0.00167378	4.75e-05	0.000705666
Chelonoidis_carbonaria	TER	-0.0718012	0.0653633	0.0338297	0.00505627	-0.0202192	0.00762559	0.00573215	-0.0105197	0.0137588	-0.0122887	0.0188019	-0.0011117	0.027947	0.0119802	-0.0024958	-0.018378	-0.0050456	0.000579553	0.0206933	-0.00466948	0.00154414	0.00345213	0.0010857	-0.0085451	-0.00259446	0.00897238	-0.00258818	0.00214788	-0.000307827	0.00691056	-0.00611699	-0.00462538	0.00531198	0.0097789	0.00575638	0.00296746	0.00035395	-0.00525231	0.000374794	-0.00480023	0.00139715	-0.00407744	-0.0038507	-0.0010067	0.000392875	-0.00394356	-0.000311473	-0.00599515
Rhinoclemmys_annulata	SET	-0.0550195	-0.0148654	0.0120457	-0.0070315	-0.00113907	-0.0367275	-0.0224162	-0.00897171	0.017452	0.0130882	0.0209504	0.0160823	-0.00429959	-0.00545564	0.010427	-0.00165208	0.00414335	-0.0117492	-0.0148968	0.0172813	-0.00371088	-0.000302622	-0.0154557	-0.00156802	0.00448692	-0.00261589	-0.00344805	-0.00326889	0.00242729	0.00275227	-0.0021206	0.00062805	0.0025503	-0.000972508	0.00137687	-0.00538817	0.00283219	-0.00123823	-0.00361962	-0.00177751	-0.00520397	0.00121161	0.00174891	-0.0034474	-0.000427222	-0.000468297	0.00518901	-0.000710464
Emydura_macquarii	SEA	0.0137627	-0.0526679	-0.0331646	0.00694695	0.0450857	0.0350985	-0.00643453	0.0188966	0.0153864	0.0148325	-0.0218892	0.00399832	-0.0119803	0.00308208	0.00235256	-0.00579721	-0.0201671	0.00851648	0.0143299	-0.00412646	-0.00427283	-0.00760487	0.000675662	0.00615152	0.00563295	0.0065878	-0.00399275	-0.00300236	0.00213425	-0.000913082	-0.00227512	2.49e-05	0.00049147	-0.000403062	-0.0041331	-0.000168682	-0.00170908	-0.00215619	0.00412809	-0.0088945	0.00224227	-0.00360484	0.00652763	-0.000348578	0.000623983	0.000131644	-0.0021384	0.00415328
Astrochelys_radiata	TER	-0.118475	0.0815119	-0.0153523	0.0393771	-0.056333	-0.0329989	0.0222957	0.0107063	-0.0137045	0.00010562	-0.0105142	-0.0130685	0.00196316	-0.0207296	-0.00519918	0.00246623	-0.00178395	-0.00607436	-0.00949658	-0.0101406	-0.0119812	0.000599869	0.00150029	0.0109432	0.00812103	0.0108684	-0.0138316	0.0170977	-0.000953069	0.00363293	0.000896475	0.0019224	-0.00257436	0.00305886	0.00402058	-0.00103544	-0.000164418	-0.00576285	-0.0017676	0.000597521	0.00278021	0.00194395	-0.00478654	-0.00167487	-0.00785939	0.00359807	-0.000656697	0.00046628
Pyxis_arachnoides	TER	-0.122799	0.0262334	-0.0306555	0.0136177	-0.037931	-0.0346489	0.0360195	0.0107169	-0.00589503	-0.0072655	-0.0173573	-0.0147872	0.0136262	-0.0101819	0.00657808	0.0119761	-0.00506393	0.00565148	-0.0136499	0.0186741	0.00074479	-0.007697	-0.00306306	-0.00575503	-0.00371427	0.00358831	-0.00235547	-0.000879113	0.00610437	-0.00776777	0.00182039	0.00316297	-0.00593961	0.00155499	-0.00429337	0.00651951	0.00228639	-0.000961855	0.00258556	-0.00572589	-4.33e-05	-0.00361966	-0.00330498	0.00314889	-0.00201352	0.00373545	-0.00322663	-0.0021208
Phrynops_tuberosus	SEA	0.0529329	-0.0220901	-0.0281905	-0.0460251	-0.0326368	-0.00776746	-0.0101772	0.0170778	-0.0183203	-0.0133491	-0.0390346	-0.00181724	-0.00728458	-0.0125539	-0.010562	-0.000378304	0.0104172	0.00675617	0.0129968	0.00170938	0.0143238	-0.0107455	-0.0058568	0.000421512	-0.00673809	0.00131438	-0.0057312	-0.00205042	-0.00128821	0.000869296	-0.000393278	-0.0012033	0.00655457	0.0015235	-0.00180738	-0.000406244	-0.00450026	-0.00312218	0.00366624	-0.00303078	0.00100245	0.00491038	0.00263705	0.00285124	-0.00435989	-0.000993487	-0.00173026	0.00371082
Podocnemis_vogli	SEA	-0.0458728	-0.0334478	0.0114754	0.0085294	0.00739434	0.0434448	-0.00591516	0.00191187	0.00830511	0.0073342	-0.0143477	-0.00695947	-0.00698065	0.00747467	0.00268096	-0.00200348	-0.00858376	0.000605829	-0.00819134	0.00374864	0.000841244	-0.00607772	-0.00331924	0.00918003	0.00283908	-0.0033322	-0.00621484	0.0018785	0.0010339	0.00224667	0.00264981	0.000171716	0.00561046	0.00859627	0.000829657	0.00242543	0.0031231	0.00539156	0.00158599	0.00818033	-0.00514553	0.00745948	0.00406653	-0.00297662	-0.00152977	-0.00247567	0.0018083	-0.00393418
Lissemys_punctata	FUA	-0.0078236	-0.0591453	0.0617178	0.0135885	0.0600929	0.00572686	0.020134	-0.0656231	-0.0473041	0.0135895	-0.00490252	-0.0239614	0.0147197	0.00866449	-0.0008177	0.0139084	0.0235898	0.00608068	4.9e-05	0.00765305	-0.0061119	-0.000802617	0.00388123	-0.0129787	-0.0107666	0.00263168	-0.0135336	-0.002488	-0.00394205	0.00648581	-0.00455492	0.00622507	-0.00417313	0.00169375	-0.00782164	0.0040242	0.00341304	-0.00103355	-0.0019175	-0.0015729	-0.00126907	0.00534608	0.00693217	-0.00168851	0.00188247	-0.000161642	0.00249628	0.000440204
Chelodina_oblonga	FUA	0.0295064	-0.0437898	-0.132299	-0.0753582	0.00745309	0.0042679	0.00664942	0.0321275	-0.0312628	0.0239255	0.0221168	-0.00189497	0.00353079	0.0141979	0.0106947	0.0171881	0.000741155	0.0194434	-0.00667603	-0.00948806	-0.00309882	0.00283473	0.00848911	0.00165197	0.00180493	0.00201771	-0.0102334	-0.00584571	-0.00837574	0.00662566	0.00526039	0.00222655	-0.00359261	-0.00403729	0.00334919	0.00252781	0.00352718	0.00736491	-0.00149513	-0.00513315	5.18e-05	-0.00356133	-0.00838452	-0.00047562	0.000593585	-0.00246573	-0.000455021	-0.00106106
Mesoclemmys_dahli	SEA	0.0355183	-0.0255877	-0.0658312	-0.0399368	-0.0202083	-0.0404005	-0.0141133	0.0180912	-0.00141722	0.00489719	-0.032891	0.00421965	0.00301916	0.0103611	-0.011836	-0.0179255	0.0150704	0.00925687	-0.00285921	0.00161527	-0.000888425	0.00168873	0.00158407	-0.00402324	0.00228553	0.00686871	-0.00193512	-0.00474228	-0.00516738	-0.00320134	0.00469453	-0.000330399	0.00262393	0.00701013	0.00543899	0.000927581	-0.00528015	-0.000892792	0.00458841	-0.000258174	-0.00489404	-0.000601686	0.000936903	0.00201364	-0.000183677	0.000172164	0.00640647	0.000374327
Chersina_angulata	TER	-0.0936962	0.0487863	0.019588	0.0237148	-0.0194707	-0.0079673	0.0229502	0.0138846	-0.00474245	0.00349598	0.00050653	-0.00462436	-0.0131309	-0.00711318	-0.00416295	0.00826638	-0.00955832	0.0174791	-0.00368986	0.00384196	-0.0071705	0.00823328	0.005459	-1.15e-05	0.00217193	-0.00590865	-0.00342889	-0.00352999	0.00676593	-0.00113139	0.00450866	-0.00204486	0.00669144	-0.00275564	-0.000860675	0.00270693	-0.00116841	0.00277649	-0.00226057	0.00127934	-0.00554323	-0.000509465	0.00497583	-0.00410809	-0.00216533	-0.000274297	0.00237461	0.0036889
Gopherus_polyphemus	TER	-0.0708751	0.000447052	0.000497364	0.0226562	-0.0244347	-0.0615392	0.0103832	0.0123344	0.00431476	0.00964417	-0.00900545	-0.00494799	-0.00538954	0.00646399	-0.00594381	0.0128942	-0.00782216	-0.00832167	0.000447843	-0.00485916	-0.00979634	0.00314324	0.00177353	0.00760094	-0.00735062	-0.00756625	0.00572791	-0.00498855	-0.000337015	0.0103218	0.00760848	-0.0016984	0.00276821	0.00538581	0.00173156	0.00575378	-0.00515811	-0.000131133	0.00165596	0.000970323	-0.00114259	0.000176394	0.00277187	-0.00454328	0.00155072	-0.0048838	-0.00574823	0.00425847
Sternotherus_odoratus	SEA	0.061557	0.10096	-0.024746	-0.00632633	0.000212154	0.00270489	0.0223998	0.0144272	-0.007527	0.00282751	0.00750604	0.0164003	0.0182072	-0.00155396	0.005665	-0.0169242	0.00180147	0.000811407	-0.0060173	-0.00585188	-0.0014344	-0.00907639	4.75e-06	-0.00474521	-0.0026281	0.00245873	0.00188259	-0.010965	0.00765081	0.0025389	0.00616187	-0.00268198	-0.00203656	0.00434075	-0.000989893	0.00121198	0.00528559	0.00186223	-0.002004	0.00127513	-0.0017495	-0.00101949	-0.00354156	0.000835123	0.00411469	0.00324794	0.00485057	0.00316138
Graptemys_geographica	SEA	-0.0182643	-0.0442124	-0.00713786	0.00327655	0.00381797	0.0113947	-0.0370965	0.00302668	0.0122748	-0.00711039	-0.00747987	0.00592741	0.0161605	-0.00321899	0.000526514	0.00571676	0.0138259	0.00446892	-0.00794524	-0.00172811	0.0111926	-0.00625811	-0.0131074	-0.00186716	-0.00214094	0.00315864	0.00528423	0.0113527	-0.00384786	-0.00535165	0.00461845	-0.00903845	-0.00642101	-0.00344884	0.00332461	0.00507423	-0.00309192	-0.00276902	-0.00347949	-0.0035033	-0.000375731	0.00347917	0.00229013	-0.00425505	-0.00176831	-0.00192	-0.000516139	0.00148787
Clemmys_guttata	SET	0.0271035	-0.00216392	0.053499	-0.0393991	-0.000630513	-0.0227306	-0.0108996	0.00209799	-0.00447845	0.00840075	0.00592946	0.01187	0.01698	-0.000623883	-0.00316466	-0.0110201	-0.0118799	-0.0022977	-0.00704825	-0.00589413	-0.000186046	0.000500339	-0.00506532	0.00157256	0.00254388	0.00380641	0.0047296	-0.0076696	0.00235773	-0.00458797	0.00760867	-0.00235574	-0.00372438	0.000264011	0.000466783	-0.00215167	0.000459306	-0.00340451	0.0019116	0.00328558	-0.00159586	0.00577368	-0.000180912	-0.00256066	-0.00305154	0.00614375	0.00142227	0.00345488
Deirochelys_reticularia	SEA	-0.0859935	0.0125614	-0.0516711	-0.0370711	0.0143665	0.00584423	-0.00357253	-0.00306133	0.000985064	0.0161818	-0.00813181	-0.00509975	-0.0146799	0.003131	-0.00172729	0.01349	0.00928436	-0.00244646	-0.00926403	-0.0124581	0.00238409	-0.000667626	0.00685764	-0.00935453	0.00549308	0.00252373	-0.00130828	0.00409037	-0.000356081	-0.00121861	-0.0108234	-0.00107284	0.00264578	-0.0013194	0.00830994	-0.00183434	-0.00159893	0.00486981	-0.00131162	0.00556586	0.00141959	0.00185588	0.00109955	-0.000137784	0.00110778	-0.00295521	-0.000187358	0.00315318
Malaclemys_terrapin	SEA	0.00828552	-0.00370366	-0.0138959	-0.0193367	0.0273048	-0.0346162	-0.0252529	0.00130806	0.00829961	-0.00227347	-0.013859	0.0190604	0.0136125	0.00505645	-0.00363907	0.014988	0.0260856	-0.0160388	-0.00535699	-0.0168736	-0.0039197	-0.00622215	-0.00565667	0.00968335	0.00307814	0.00385692	0.00826948	0.00464018	0.000663936	-0.000703241	-0.00916339	-0.000715162	0.0113059	-0.00857745	-0.00484471	0.00578752	0.00521711	0.00639276	0.00337688	8.2e-05	-0.00241793	-0.00236939	-0.00216052	0.000941994	-0.00175321	0.00123075	-0.0033683	-0.00314946
Kinosternon_baurii	SEA	-0.0216111	0.0536947	-0.00268198	-0.0328382	-0.0202884	0.0512255	-0.0102597	-0.0169379	-0.036466	0.0306705	0.0147622	-0.00975628	0.0117768	0.00366805	0.0123678	-0.0241433	-0.00760919	-0.00204833	-0.0113463	-0.00539141	-0.000488972	0.00235549	0.0046264	0.00184661	-0.00516518	-0.00127286	0.00732815	0.00515275	-0.000218423	0.00403567	0.00450006	-0.00167165	-0.00372364	-0.00182996	0.00190098	-0.00519382	0.00591473	0.0031684	0.00366656	0.000708756	-0.00664623	0.00104441	0.00110907	0.00326787	-0.00346665	-0.00267332	-0.00379657	0.00523719
Emydoidea_blandingii	SET	-0.00840617	0.0163143	0.0784009	-0.0813711	-0.0147501	0.0502816	-0.00546263	-0.0353562	-0.0218959	0.00703129	0.00425559	-0.013305	0.0117747	-0.00941774	-0.000657245	0.0103452	-9.41e-05	0.0101611	-0.00127109	-0.00628387	-0.0017797	-0.00618595	-0.00973549	0.00507744	-4.01e-05	-0.00207322	0.00916357	0.00919945	0.00215805	0.00319879	-0.00457043	-0.00270311	-0.00143263	0.000934138	0.00118706	0.000612078	-0.000159999	-0.00614078	-0.000122191	0.00047012	0.00017975	-0.00306434	0.000721961	0.00269209	0.0021873	0.00041881	0.00015248	0.001426
Eretmochelys_imbricata	FME	0.0335334	-0.0606393	-0.01035	0.109078	-0.0434269	0.0519945	-0.0326225	-0.0223283	0.00742421	-0.0233357	-0.00546797	0.0266606	0.00961305	0.0123479	-0.00676029	0.000723623	0.0074401	0.0114163	-0.00421836	0.00822391	-0.0100395	-0.00321442	0.00949684	0.017275	-0.00909793	0.00919084	-0.00394412	-0.00527279	0.00822437	0.00510953	-0.012703	-0.00410944	-0.00746329	0.000399301	0.00324041	-0.00884468	-0.00827526	0.00468728	-0.00200695	0.00401765	-0.00278963	-0.00032642	-0.00268849	-0.00065258	-0.00183086	3.99e-05	-0.00181635	0.000269958
Geochelone_elegans	TER	-0.135019	0.0581162	-0.000316	0.0614413	-0.0227724	-0.0358491	0.00809672	0.0123241	-0.0149	0.0102602	-0.0153042	0.0056803	0.00188125	0.0096869	0.0126342	-0.00273825	-0.0143304	-0.00606105	-0.00703408	-0.0118083	0.00368856	-0.015606	-0.00189608	0.00693146	-0.00902742	-0.00145507	0.00456236	-0.00593627	0.00337169	0.00317814	-0.00284196	0.00176997	-0.00538687	-0.00562069	-0.00629936	-7.27e-05	0.00313065	0.00286418	-0.00258475	-0.00153335	0.00895457	0.00239815	0.00475547	-0.0014852	0.00209445	-0.00517122	0.00362009	-0.00409347
Chelonia_mydas	FME	0.0566557	-0.0263617	0.0131954	0.0724285	-0.0824315	0.00924817	-0.0318923	-0.0277663	-0.0393618	-0.0361367	0.00863668	0.0240416	0.00313142	-0.00573484	-0.0112819	-0.00673497	0.000932403	0.00711232	-0.00151851	-0.0029927	-0.00585292	0.015196	0.0131639	-0.00683202	0.0101631	-0.0114203	-0.00229342	0.00338872	-0.00189387	-0.00347853	0.00458808	-0.00918808	0.00571924	-0.00191466	-0.00792753	0.00710723	0.000989389	0.00051126	-0.00314931	-0.00516768	0.00291495	0.0013762	-0.000698019	-0.000782375	0.00139951	-0.0014309	0.000221876	0.000845538
Actinemys_marmorata	SEA	0.0606538	-0.0312954	0.085582	-0.0294754	0.0241777	-0.0095611	-0.00998776	-0.000888891	-0.0194493	0.00883276	-0.0029909	0.000697699	0.00993441	-0.00168582	-0.00186449	-0.00407239	0.00163814	0.00531752	-0.0027698	0.000353999	-0.00929424	0.001357	0.0017193	0.00222308	0.00995724	-0.00649688	-0.00325849	0.00165381	-0.00153886	0.00105001	-0.000498354	-0.00269774	0.000350006	-0.00201696	0.00341207	-0.000248092	-0.000726411	0.000624149	-0.00380132	0.00380478	0.0031166	-0.00204618	0.000186533	0.00448001	0.00396447	-9.38e-05	-0.00450057	0.00293294
Terrapene_carolina	TER	0.0051786	0.0788433	0.102726	-0.0281062	-0.00458692	0.0286454	-0.0115076	-0.0211615	-0.0223972	0.0391588	0.00753264	-3.75e-05	-0.00434698	-0.0032282	-0.0141534	0.000452624	-0.0199728	0.0076616	0.0055901	0.000326178	0.0115228	0.00705817	-0.0027861	0.00329948	0.00570642	0.0110122	0.00223569	-0.00537707	-0.00233302	-0.000465077	-0.0114216	0.00225992	-0.0011472	-0.00271114	-0.00447759	0.000232571	0.000204078	-0.000389443	-0.00476178	-0.00351582	-0.00253945	0.000390639	-0.000448374	0.0037726	-0.00246296	-0.00120656	-0.00160228	-0.000839981
Testudo_graeca	TER	-0.0419497	0.0216454	0.0374506	0.0387504	-0.00623958	-0.0286306	0.0113482	0.0235355	0.00707424	0.0237198	-0.00867008	-3.98e-05	0.0193554	0.0132224	-0.0124469	-0.00513346	0.00466822	-0.0156502	0.00810396	0.00104979	-0.00853248	-0.00568604	0.0124666	0.00342329	0.00720291	-0.00398647	-0.00237976	-0.0114815	-0.00756647	-0.00474725	-0.000670908	0.00241604	0.0038022	-0.00814885	-0.00242363	-0.00609941	0.00103087	-0.00272077	0.00111169	-0.0011998	0.00333142	-0.00361164	0.000324635	-0.00172088	-0.002314	0.00532253	0.00283007	0.00131682
Hydromedusa_tectifera	FUA	0.0727176	-0.0130677	-0.0344701	-0.0677208	-0.0800327	-0.0307588	0.00166054	0.0190605	-0.0413401	-0.00188523	-0.0121107	0.00619891	-0.00786468	-0.00469452	0.00904018	-0.00423471	-0.00239397	-0.00313317	0.00960451	0.0107879	0.00656477	-0.0061529	-0.00137555	-0.00478535	-0.0107352	0.000835205	0.00192609	0.000659673	-0.00675389	3.46e-05	-0.00256604	-0.006472	0.00144247	0.00561885	0.002451	-0.00178314	0.0064741	0.0092876	-0.00700961	0.00272048	0.00616716	-0.00303273	0.00373887	-0.00196674	-0.00327178	0.00453074	-0.00485776	-0.00173909
Orlitia_borneensis	SEA	-0.0797275	-0.0131609	-0.0409642	0.0059321	-0.0285876	0.0498981	-0.0192599	-0.00793338	7.03e-05	-0.00631739	-0.00988549	-0.00890767	0.00124106	0.00468854	-0.0102225	0.00555556	-0.0052935	-0.0014925	-0.00530685	0.000318384	-0.000525863	-0.00649194	0.00233401	-0.00529872	1.78e-05	0.00753476	0.00266757	-0.00346331	-0.00632852	-0.00119036	0.0100757	0.00431261	0.00226434	-0.0105313	0.0061738	0.00182551	-0.0058206	-0.00501364	-8.08e-06	0.00127223	0.00161525	0.00126622	0.00348429	0.00927976	-0.000189963	2.12e-06	0.0024893	-0.00116898
Cuora_amboinensis	SEA	-0.0471476	0.0544878	0.00748717	-0.0345458	0.0310193	0.0147298	-0.00611116	-0.0269844	0.0234231	-0.00989384	-0.0191178	-0.0247672	0.0144713	-0.0106178	0.00101581	-0.0084312	0.00335698	0.00196027	-0.00920219	-0.00119607	0.0191303	0.00994608	0.00602292	0.00891662	-0.00494796	0.00680723	0.00371745	-0.00721441	0.000822416	-0.00256349	0.00617778	-0.0016451	0.00898046	-0.00315921	-0.00530294	-0.00201958	-0.00676786	0.0048823	-0.00344686	-0.00416188	-0.00315545	0.00199598	-0.00413355	-0.00570157	0.00386987	9.79e-05	-0.00197289	-0.00743715
Notochelys_platynota	SEA	0.015782	0.00227992	0.0134686	-0.0276738	0.0196971	0.00681522	0.040197	0.0201321	-0.0122584	-0.0500056	-0.0118137	-0.00561867	0.00729653	-0.024347	0.0194012	0.0144953	-0.0166887	-0.0110076	0.000655118	0.00185089	0.00797957	0.00767219	0.0124269	0.00895411	-0.00697934	-0.00233044	-0.00262343	0.00701075	-0.00640729	-0.00236815	0.000217438	-0.00291779	-0.0016632	-0.00202667	0.00107631	-0.00430609	-0.00162412	-0.000688925	-0.00494319	0.00400435	-0.00508716	-0.00721153	0.00564238	0.00251864	0.00201982	0.00168272	0.00673889	-0.00228036
Cyclemys_dentata	SEA	0.032466	0.00356736	0.0623017	-0.0165841	-0.0109967	-0.0249474	-0.031412	-0.0175694	0.00010138	-0.0102586	0.00588166	0.0207736	-0.0199174	-0.00474656	-0.00205863	0.000699936	-0.00176882	0.0184325	0.0115605	-0.00440248	-0.000125301	0.00318261	-0.00501759	0.00866797	-0.00660315	0.00614059	0.000374674	0.00597637	-0.00708519	-0.000505065	0.00348761	0.00609191	-0.00205602	0.00151052	-0.00468272	0.00143946	0.00537382	0.00318149	0.00773453	-0.0023513	-0.00536331	-0.00659564	0.00125068	-0.00838841	-0.00146298	0.000368142	0.00298324	0.0012254
Batagur_dhongoka	FUA	-0.052705	-0.0278362	-0.0401725	0.0174576	0.0121643	0.0684037	-0.0182327	0.00541835	0.0442288	0.0010776	-0.0180015	-0.00241564	-0.0137995	0.00403817	0.0119061	0.0249355	-0.00293979	-0.00117806	0.00733508	0.00506628	0.00543374	-0.00456217	0.000590641	-0.00608012	0.00261975	-0.00467103	0.001389	0.000672367	0.00589665	0.00814307	-0.000375635	-0.00794928	0.000883459	-0.000138691	-0.00421179	-0.0060613	0.00479272	-0.00137938	-0.000507988	-0.00735288	-0.0044722	-0.00407963	-0.00488884	0.00186665	-0.00127091	0.00492952	0.00256183	0.00490751
Vijayachelys_silvatica	TER	0.0138111	-0.00510985	0.0343412	-0.0386661	0.0304647	0.0212758	0.0291639	0.024029	0.00515752	-0.0345649	0.0136122	0.00346176	-0.00422466	0.00466313	-0.00347813	0.00163071	0.00476911	-0.00500816	0.00504677	0.0189474	-0.00614371	-0.00602329	0.00848871	-8.8e-05	0.00251105	-0.00892068	0.00765533	-0.00273499	0.0102132	-0.00526483	-3.4e-05	0.00287099	0.00208796	-0.00297843	0.00400727	0.00488647	0.00676783	-0.000178088	-0.0033374	-0.00128902	-0.00138679	0.00226149	0.000229474	-0.000227706	-0.00839484	-0.00217294	-0.00588699	-0.000824496
Melanochelys_trijuga	SEA	-0.0658402	0.00823895	0.00230899	-0.0299049	-0.00449168	0.0160251	-0.028529	-0.00682452	0.0125936	-0.000116749	0.0108644	0.0169938	-0.00465213	-0.0028554	-0.00138885	0.00366481	-0.000832274	-0.00643999	-0.00737475	0.00748012	-0.00797481	0.00713358	-0.00106307	-0.00141723	-0.00129982	0.00378921	0.00731145	0.00617246	-0.000559445	0.00113978	0.00370229	0.00366676	0.00261874	-0.000417557	0.00162537	0.00220823	-0.00193759	0.00445558	0.0065483	-0.00010337	0.00346658	-0.0029502	0.000780633	0.00186212	0.000896806	-0.00168031	0.00449411	0.000644671
Caretta_caretta	FME	0.0532602	0.0435568	-0.0954535	0.051873	0.0403942	-0.0315658	-0.0110057	-0.0350463	-0.0195657	-0.0170223	0.0108183	0.03683	0.0146489	0.0210567	0.0185016	0.00685281	-0.00547892	-0.00497305	-0.00170548	-0.00512813	0.0241735	0.00110773	0.00712311	0.00354597	0.0111963	-0.00494628	0.0034677	0.00239569	0.00189728	0.00896317	0.00107114	0.00450472	-0.000105805	0.00734859	0.0024538	0.00126369	-0.000704211	-0.00528207	0.00128606	-0.00327482	0.000108754	0.00285979	0.00755031	0.00222147	-0.000493893	0.00423757	-0.00295203	0.000521126
Dogania_subplana	FUA	0.171639	-0.0875542	0.0167014	0.00529861	-0.0354693	-0.0401361	0.0569453	-0.0114119	0.0344506	0.0362606	-0.00509787	0.00955363	0.00624204	-0.00588312	-0.00132932	0.00229543	0.00370484	-0.00455835	0.00687511	0.00946617	-0.00411755	0.00529245	-0.000987719	-0.00301763	-0.0050542	0.00696184	0.0134642	0.00561804	-0.00151654	0.0149233	0.00290429	0.00452277	0.00306197	0.00031262	-0.00559734	0.000363355	-0.00601437	0.00166349	-0.00691588	0.00346916	0.00310075	-0.000187746	-0.00180031	0.00256991	-0.00108	0.00338529	0.00290118	0.00117458
Heosemys_spinosa	SEA	-0.0116193	0.00213653	0.0417368	-0.00702581	-0.016991	-0.0484421	-0.0558133	-0.00317625	0.0108551	-0.0127437	0.0241818	0.0207409	-0.0260658	-0.010211	0.00226564	-0.00372732	0.00332705	-0.00616193	-0.00378537	4.66e-05	0.00651081	-0.00678517	-0.0023923	0.000308478	0.01072	0.0039548	-0.00842739	-0.00529237	-0.00417286	0.00114741	-0.00357066	0.0116126	-0.00139928	-0.000229872	0.00469948	0.00363052	0.000594686	-0.00139535	-0.00685761	0.00100145	-0.00414606	-0.00396102	0.00184953	0.00278136	0.00384465	0.00203625	-0.000452348	-0.00223797
Chelus_fimbriata	SEA	0.058693	0.000154875	-0.0652075	-0.0426206	-0.0327013	-0.00642543	-0.0264428	-0.00957128	0.0278637	-0.0263951	-0.0202046	-0.0329236	-0.0113748	0.0411911	0.00533049	-0.0125236	-0.00778983	-0.00592695	0.013686	-0.0153956	-0.00391334	0.0127995	-0.00620962	0.00269884	-0.00633756	-0.00248083	-0.000959812	0.00557737	0.00889088	-0.00502255	-0.00280262	0.00857337	-0.00509781	-0.00491661	-0.00097474	0.00646499	0.00173803	-0.00284426	-0.0102198	0.00215708	-0.000545182	0.00212257	-0.0021128	-0.00266106	0.00220523	0.00274551	0.00221723	0.00388858
Macrochelys_temminckii	SEA	0.139006	0.125351	-0.00629544	0.058788	0.042036	0.0443749	0.0275636	0.0465531	0.0120426	-0.033642	0.00541037	-0.0180708	-0.00716985	0.00146387	-0.0393945	0.00861959	0.0126769	-0.00794287	-0.0118699	-0.0155289	-0.00471856	0.00911903	-0.0133522	-0.00173457	-0.00419336	-0.00310143	0.000306454	-0.00266349	-0.00529973	0.00284356	0.00242983	0.00309669	-0.00290269	0.00842324	-0.00156293	-0.00733617	0.00406293	0.00421435	-0.000821056	-0.00370806	-0.000199659	-0.00110477	0.00476714	0.00374802	-0.000149892	0.00230144	-0.00223962	-0.00113133
Malacochersus_tornieri	TER	-0.00187375	-0.112665	0.0327624	0.00708595	-0.0717405	-0.00713072	-0.0277988	0.0241039	-0.0107388	-0.0230213	0.0180042	-0.0321854	0.0136143	0.00728814	0.0121024	0.00272678	-0.010914	-0.00507639	-0.000872947	-0.00723769	-0.00961557	-0.000588818	-0.0111314	-0.0109	0.000916887	-0.00227634	0.00113108	-0.0051432	0.00659597	0.00197067	-0.00177175	0.00143955	0.00420353	0.000556881	0.0035682	-0.00478632	-0.00454609	0.00170408	0.00474619	-0.00157122	2.53e-05	-0.00668771	0.00548789	0.00143477	0.00213726	-0.00371144	-0.00127107	-0.00375506
Malayemys_subtrijuga	SEA	0.00560346	0.0209509	0.0168828	0.000810732	0.0387233	-0.0230967	-0.00513139	0.010103	-0.026392	-0.00844724	-0.0144779	0.0241104	0.00356258	-0.00634312	-0.00954324	0.000199637	0.00120114	-0.0118132	0.00523243	0.00344172	-0.00254129	-0.0034426	0.00290984	-0.00504598	-0.00420215	0.00754491	-0.0088701	0.00818741	0.014274	-0.00518322	0.00298993	-0.00167843	0.00188282	0.00066473	-0.00181392	-0.000193174	0.00153067	0.00238359	-0.00317963	-0.00132396	-0.00246897	0.00173171	-0.00318128	0.00623488	0.00797192	-0.00518228	0.00129315	0.00231846
Indotestudo_elongata	TER	-0.0942223	0.0264226	0.00332818	0.00260465	-0.0604104	0.0465107	0.0446683	0.0363366	0.0234888	-0.00783324	0.0184318	-0.0094319	0.0190587	-0.000612538	0.0070003	-0.00736163	0.0309822	0.0070197	0.0203364	0.00438105	0.00900092	-0.00409022	0.00748484	0.00359763	0.00513235	-0.001553	0.00176648	6.7e-05	0.00219391	9.91e-05	-0.000484711	0.0109815	-0.00218651	0.000447866	-0.000375885	0.00456544	0.000693491	-0.000212107	0.00429288	0.00645689	-0.00543895	-0.00144488	0.0014842	-0.000130514	0.00205344	-2.93e-05	-0.00165628	0.00152735
Pangshura_tentoria	SEA	-0.0850332	-0.0150012	0.0136408	0.00421522	0.019714	0.0368611	-0.0190829	-0.0129681	0.0197782	-0.000865514	0.0115337	-0.000668096	-0.0211591	0.0100394	0.00648049	-0.00496464	0.0132713	0.00387665	-0.00687923	0.00249885	0.00956485	0.00733737	0.0094991	-0.00805039	0.00344565	-0.0015599	0.00236476	0.00406269	-3.61e-05	0.000812362	0.00604685	-0.00116046	-0.0102551	0.00084836	-0.00503592	-4.22e-05	-0.00424164	0.00312526	0.00337593	0.00427299	0.00874018	-0.00171566	0.000357508	-0.000269721	-0.00231143	0.00336908	-0.000551781	-0.00499621
Morenia_petersi	SEA	-0.0828241	0.0178048	-0.0472573	-0.0311567	-0.0277351	0.0129445	-0.0243353	-0.00634054	0.00878316	0.0146835	0.009697	0.0155932	-0.0040233	0.0175902	-0.00499463	0.000324883	-0.00361719	-0.00807096	-0.00346338	0.00137096	-0.00070683	0.003002	0.0120064	-0.0135663	-0.00938741	-6.11e-05	0.00161238	0.00796583	-0.00452404	-0.0094025	-0.00188445	0.00797832	0.00814689	0.00462361	-0.00958202	-0.0127808	0.00212837	-0.00574706	-0.00196003	0.00163259	-0.000383975	0.000358329	-0.000134295	-0.000532185	-0.00497418	-0.00463126	-0.000605101	0.000151296
Geoemyda_spengleri	TER	0.00720831	-0.0337787	0.0443853	-0.0234023	0.0672127	-0.0343691	0.00932709	0.00530693	-0.00742499	-0.0173934	0.0265966	-0.00119738	-0.0118238	0.00374076	-0.00676657	0.00644572	0.00584049	0.00441832	0.00850141	-0.00520681	-0.00889933	-0.0144746	0.00734548	0.00332686	-0.00305328	-0.00202546	0.00957522	9.19e-05	-0.0022343	0.00253997	0.00753147	0.000970475	-0.00494121	0.00110758	0.00594817	-0.00295521	-0.0047137	-0.00514068	-0.00713552	-0.00758046	-0.00147843	0.00208619	-0.00337602	-0.00259166	-0.00577771	-0.00521392	0.0030821	-0.00364029
Manouria_impressa	TER	-0.0264095	-0.0216042	-0.00198294	-0.00300777	-0.005308	-0.0378301	-0.0112383	-0.0133911	0.00722761	-0.00801468	0.0193108	-0.00598308	0.00279264	0.000620152	-0.0197512	0.00485278	-0.00455979	-0.0102215	0.00541292	-0.00134276	0.00897764	-0.0171561	0.000335055	-0.00394379	0.00132674	-0.00222084	-0.00323475	0.00225638	-0.0063033	-0.000804069	0.00953779	-0.00391048	-0.00733674	-0.00322734	-0.00920308	-0.00596528	-0.00329365	-0.000977479	-2.84e-05	0.0071362	-0.00459381	-0.00309771	-0.00316368	-0.00272052	0.00726276	-0.00182598	-0.00754649	0.00368494
Platemys_platycephala	SET	0.0215274	-0.084353	0.000652328	-0.0743272	-0.0362454	0.00268328	-0.00321774	0.017179	-0.0227801	-0.0244952	0.0135124	-0.000715506	-0.0116333	-0.010465	0.00345672	-0.00988117	0.00923825	0.00578576	-0.00590033	-0.00354177	0.00513359	0.000786585	-0.00132829	0.0147104	-0.00414278	-0.0137692	0.000649602	-0.00762069	0.000185913	-0.00059249	-0.00422733	0.00294167	0.000406964	0.00178474	-0.00393218	-0.00583674	0.000426662	-0.00235331	0.00234621	-0.00206928	0.00318626	0.00685547	-0.00521573	0.00640622	0.000891964	-0.00086869	0.00382598	0.000205837
Trachemys_scripta	SEA	-0.0389349	-0.0548295	-0.0100046	-0.0329956	0.0280305	0.00353036	-0.00215531	0.0213455	-0.00179674	0.00875016	-0.0051602	0.000820435	-0.0163253	-0.00746569	-0.0196877	0.00026039	-0.00858257	-0.0227799	0.00377718	0.00911466	0.00194371	0.00630159	0.0126593	0.000319984	0.00180743	0.0134756	0.00850149	-0.00432112	0.00245751	-0.00718381	-0.00466511	-0.00183038	-0.00976105	0.00950162	0.00473277	0.00418358	0.00187763	0.00324429	0.00253818	-0.00173334	0.00213697	0.00179785	6.99e-05	-0.00180582	0.00473787	-0.00127049	-0.000394842	0.00095302
Glyptemys_insculpta	SET	0.00560982	-0.02784	0.0461532	-0.0425987	0.0279396	0.0207524	0.0059392	0.0152703	0.0173304	-9.56e-05	0.0168398	0.000938022	0.00680772	0.0128579	0.00327055	0.00726371	-0.0107688	-0.0201168	-0.00245153	0.0161091	0.00458149	0.0117069	-0.00335725	0.0184571	-0.00636807	-0.00206855	-0.0140025	0.00116419	-0.00512861	0.00467324	0.0028503	0.00255919	0.00454014	0.000293605	-0.000889978	0.00365409	-0.000492685	-0.0034017	0.00542651	-0.000544433	0.00645335	0.00242159	-0.00400279	0.00155397	0.00178257	-0.000806781	-0.00327881	0.0023819
Chrysemys_picta	SEA	-0.0133951	-0.0385478	0.017506	-0.0253799	0.00684027	-0.0224842	-0.0350858	-0.0145357	0.00177275	0.00466562	-0.00907605	-0.00803214	0.00842567	-0.00381298	0.00159634	-0.00691001	0.00606795	0.00634429	-0.00720499	0.00222529	-0.00422515	0.00558048	-0.00417395	-0.000506022	-0.000895642	-0.00716194	-0.00363239	-0.00400346	0.0013076	-0.00817894	-0.00356439	0.00256608	-0.0041731	0.00120803	0.00250673	-0.00515538	-0.00263387	-0.00167861	-0.000308155	-0.00323309	0.00249782	-0.00181815	0.00115346	-0.00440691	9.22e-05	0.00644323	-0.00611741	-0.000819064
Proganochelys_quenstedti	UKN	0.0591909	-0.0336918	-0.0500966	0.100687	0.0635525	-0.0676161	-0.0909025	0.0527427	0.0165296	0.0193698	0.0184892	-0.0419949	0.0123361	-0.0255849	-0.0139516	-0.0146686	-0.00957188	0.00999545	-0.00152482	0.00709538	0.0103419	-0.000178391	0.00972443	-0.00181452	-0.00880961	-0.0091029	0.00315334	0.00723566	0.000242478	0.00503112	-0.00814373	0.000811399	0.000293065	-0.00206539	0.000338525	0.00425116	0.00426694	-4.95e-05	0.00226943	0.00215885	-0.00056035	-3.27e-05	-0.0018022	0.00253442	-0.00197084	-1.54e-05	0.00266009	0.000667059
Proterochersis_robusta	UKN	0.022414	0.106455	0.0061882	0.0201746	0.0392882	-0.00845212	-0.0383374	-0.0127709	0.0257131	-0.018951	-0.0228084	-0.00736911	-0.0191774	-0.0237277	0.0370402	-0.0096304	0.0020706	0.00638492	0.0156284	0.00119083	-0.0216967	-0.0012824	0.0048853	-0.00649502	0.000220609	0.00642817	0.00163057	-0.00298078	-0.00801812	0.00581183	0.00397416	4.33e-05	0.00238657	-0.00271752	0.00132381	-0.00450067	0.00287889	-0.000653092	0.00140744	0.00140024	8.76e-05	0.0079293	-0.00113235	0.00248228	0.00363352	0.000822685	-0.00643558	-0.00199957
Plesiochelys_bigleri	UKN	0.0443137	-0.0889496	0.0333127	0.0938779	0.0193926	0.0232771	-0.00245429	0.0484415	-0.0381965	-0.00590358	-0.00568589	-0.00930735	0.00833769	-0.0129603	0.0289813	0.0111233	0.00962791	-0.0143124	0.00326114	-0.00654563	0.0095488	0.0167868	-0.0084901	-0.00653736	0.00905416	0.0132257	0.00472887	-0.00982175	-0.00326161	-0.00430277	0.00025213	0.00136205	-0.000586114	0.000285814	-0.000370227	-0.00178031	0.00194669	-0.00294615	-0.00142066	0.00306623	0.000792317	0.000540978	-0.0037097	-0.00469022	-0.00396322	-0.00529428	0.000265226	0.00515833
[truncated: 24 more columns]

## Sheet: pca_SET2
species	ecology	Comp1	Comp2	Comp3	Comp4	Comp5	Comp6	Comp7	Comp8	Comp9	Comp10	Comp11	Comp12	Comp13	Comp14	Comp15	Comp16	Comp17	Comp18	Comp19	Comp20	Comp21	Comp22	Comp23	Comp24	Comp25	Comp26	Comp27	Comp28	Comp29	Comp30	Comp31	Comp32	Comp33	Comp34	Comp35	Comp36	Comp37	Comp38	Comp39	Comp40	Comp41	Comp42	Comp43	Comp44	Comp45	Comp46	Comp47	Comp48
Dermatemys_mawi	SEA	-0.00138142	0.0471547	0.0348671	0.0163348	-0.00239502	0.0028346	-0.00234835	0.00299444	-0.00123823	0.00861197	-0.0060463	0.00113138	-0.00192595	0.00927207	-0.00332995	0.0030708	-0.000977609	0.00253931	-0.00185298	0.000105066	-0.000201661	0.00304426	-0.0011378	0.0037036	-0.00417848	0.00139931	-0.00102654	-0.00312594	0.00037188	0.00327815	-0.00117436	-0.00326436	0.00131576	0.00282715	0.00200133	-0.00082498	-0.000452102	-0.000414688	-0.0010839	0.000939667	0.00111856	0.000647535	0.00051123	0.000810985	-0.00129145	-0.00057919	-0.00146979	-0.000707956
Staurotypus_triporcatus	SEA	0.0657963	0.0388047	-0.0132775	0.00493513	0.0258009	-0.00871033	-0.0118378	-0.00679965	0.00516581	0.00329229	0.00528462	0.00531024	0.000270014	0.00168269	-0.00454479	-0.00268787	0.00419073	0.000461736	-0.00489832	0.00272282	0.000722515	-0.000898126	0.00239142	-0.0022208	0.000391964	-0.00276133	-0.000199557	0.000107202	-0.00207901	0.00224385	0.00128204	-0.0020159	-0.000160214	0.00191746	0.00135761	0.000829591	-0.00129406	-0.0026827	0.00332191	0.0011528	-0.00181821	-0.00103887	-0.00103019	0.00164977	0.000205302	0.000398868	-0.000538839	-0.000914134
Claudius_angustatus	SEA	0.0405191	0.0788418	0.000610874	0.0317612	-0.0102356	0.0056023	0.0057455	-0.000995901	-0.0053245	0.00357197	-0.00840942	0.00256481	0.00318161	-0.00173454	0.00350321	-0.00419185	-0.00661197	0.00528281	0.00281224	0.00156259	-0.00348417	-0.00403089	-0.001575	0.000504344	0.00120174	0.0043167	-0.00270148	0.00198447	0.00138459	0.00266391	-0.00257134	0.00111895	0.000726168	-0.00343966	-0.000399949	-0.000564641	-9.47e-05	-0.00197796	0.00361442	0.00069294	-0.000962235	0.00103429	0.000682844	-0.000463617	0.000585179	0.000613571	-0.000473533	-0.000496581
Sacalia_quadriocellata	SEA	-0.0723459	0.000784227	0.027834	-0.00672441	0.000192705	-0.00725998	-0.0262031	0.00202399	0.0030785	-0.00419905	0.00200283	0.00221161	-0.00604414	0.00384679	0.00110216	0.000613486	-0.00355652	-0.00108556	0.00304784	-0.00168526	-0.00477682	0.000387295	-0.000398339	-0.0013168	-0.00126389	0.00156389	-0.000651762	0.00405984	0.000722558	0.00183212	0.00216159	0.000690359	0.000740623	-0.00138519	-0.000730858	-0.00128807	-0.000702223	8.44e-05	-0.00103469	-4.47e-05	0.00154507	-0.000771242	-0.000773611	-0.000812136	0.0029503	7.68e-05	-0.000197219	-0.000793585
Mauremys_reevesii	SEA	0.0122799	0.0235884	-0.0016809	0.0123643	0.0167227	0.00809307	0.00494611	-0.000894743	-0.00385608	-0.00527262	-0.0146013	-0.00265118	0.000261678	0.000135785	0.00139622	0.00316811	-4.74e-05	6.39e-05	-0.0038482	0.00216204	0.00113739	-0.000193757	0.00143371	-0.00157711	-0.0036303	-0.00152349	-0.00196795	0.00152856	-0.000304961	0.0012663	0.00141909	-2.19e-05	0.00198157	0.000986185	-0.00139628	0.00213326	-0.00136908	0.00154846	-0.0021283	-0.000592654	0.00112325	0.000296049	-4.7e-05	-0.000589541	0.0010635	0.0030228	-0.000549768	0.00121911
Apalone_mutica	FUA	-0.0747552	0.00167214	0.0501093	-0.0163868	-0.0117262	0.0361158	-0.00953596	-0.0171486	-0.00324643	-0.0114411	-0.00197375	-0.00514007	0.0214695	-0.00361689	-0.00261611	-0.0109974	0.00490519	-0.00917156	0.00352292	0.00279532	0.000385328	0.00136363	0.000219819	0.00320222	0.00045433	0.00334059	-0.000495791	0.000848361	-0.00100922	-0.00101681	-7.1e-05	-0.00252875	0.000928241	0.00132469	0.00369691	-0.000321554	-0.000411017	9.41e-05	0.000152291	-4.87e-05	-0.00159762	-2.76e-06	-0.000246864	-0.000949938	0.000510366	0.00041328	-0.000915206	-0.000109094
Pelusios_sinuatus	SET	-0.00541424	0.0212415	-0.0186364	0.00704346	-0.0124683	0.013431	0.000683371	-0.00198514	-0.00688651	-0.000583383	-0.00114629	0.0020887	-0.000936092	-0.0024594	-0.00290482	0.00190875	-0.00132494	0.00167976	-0.0022635	0.00200833	0.000422797	-0.00311177	0.00169557	-0.00298811	0.000694657	0.000500259	-0.00470461	0.00011687	-0.00261216	-0.000949066	0.00031484	-0.00184242	-9.12e-05	0.000643284	0.000364364	0.00249022	0.000702857	0.00201775	-0.000189853	0.000460816	0.00167712	0.00261763	-0.00114732	0.000716057	-0.0022787	-0.000504749	-0.00183279	-0.000988257
Elseya_novaeguineae	SEA	0.00392133	0.0105047	0.0585893	-0.00110518	0.00779391	0.00199899	-0.00937343	0.00831032	-0.00682537	0.00164288	0.00582136	-0.000388963	-0.00284698	0.00205202	-0.000144517	-0.000660979	-0.000607481	0.00310689	0.00210072	-0.00365013	-0.00144239	-0.00228105	0.0016679	-0.000239152	-0.000511371	0.000800248	-0.000129698	-0.00116673	0.00386325	0.00299324	-0.000151769	0.00177412	-0.000441037	0.0023226	0.00288806	-0.000280591	-0.00167337	-0.000481529	-0.000214905	-0.00220164	-0.000536141	-0.00111212	0.00147003	0.000777444	0.000820513	-0.000859495	-0.000163592	0.00155371
Chelydra_serpentina	SEA	-0.101068	0.0294623	-0.0640984	0.0185887	-0.00735323	-0.00197255	-0.00190743	-0.00287711	0.000309175	0.00503332	0.00859931	0.00526247	-0.00736378	0.00635785	-0.00801225	-0.0114517	0.00901871	0.00611022	0.00253569	0.00277148	-0.000115027	0.0014109	-0.00102368	0.00287578	-0.00224381	0.00017514	0.00691232	0.00295126	-0.000325387	-0.00235101	-0.00344549	0.00139179	-0.00228987	0.00210374	-0.00172694	0.000484438	0.00116261	-0.000771057	-0.00137711	-4.38e-05	-0.000100955	0.00128329	0.000972167	-0.000547049	-0.000179656	0.00105168	-0.00152548	0.000156381
Carettochelys_insculpta	FME	-0.0291675	0.0637237	-0.0345339	-0.0172038	-0.0083331	0.0116748	0.00116973	0.00242819	-0.010272	-0.0039676	0.00885894	-0.00773364	-0.00092279	-0.00205541	0.000634312	0.00461378	0.00295675	-0.00456877	-0.00267106	-0.00565489	-0.00196916	-0.000281715	0.00307856	0.0021132	-0.00235134	0.00255981	0.00352756	-0.0013831	-0.00227112	0.000233352	0.00282269	-0.000396386	0.00124041	-0.00233319	-0.00153724	0.000588416	0.00210313	0.000360239	0.000609965	0.00461466	0.000499312	-0.00135004	0.000584253	-0.000449112	-0.000583372	0.00182655	0.000295068	0.000274514
Emys_orbicularis	SET	-0.024569	0.0201633	0.0136311	0.014594	-0.00128822	0.00222079	-0.00662477	0.013562	-0.00866708	-0.00486264	0.000717939	-0.00338656	-0.00142084	0.000262059	-0.000159919	-0.00220456	0.00109544	0.00243996	0.00203907	0.000277066	-0.00202693	-0.00249267	-0.000698978	-0.000865315	0.000263164	0.000988003	-0.00148336	0.00160085	0.000938626	-0.00219808	6.65e-05	0.00129399	0.000273538	-0.00136852	0.0010836	-0.00130069	0.000788661	-0.0018386	0.00140043	-0.000561701	0.0012176	0.00194593	-0.00199894	-0.00013478	-0.00114338	-0.00234161	-0.000125138	1.92e-05
Pelomedusa_subrufa	SEA	0.0040756	0.00515638	0.0225928	-0.00306134	0.0246191	0.00985348	0.0188348	0.00745654	0.00334161	2.5e-05	-0.000718066	0.00524736	0.000646428	-0.000431258	0.000750323	0.00582536	-0.00328148	4.73e-05	0.00336388	-0.00231957	0.00135726	-0.00465554	0.000802714	0.000932567	0.00172414	0.00167251	0.00121421	-0.00157808	-0.00214694	-0.00137002	-0.0018341	0.000387488	-0.000297866	0.0017501	-0.000245327	-2.2e-06	0.00424217	8.46e-05	0.00132811	-0.000267115	-0.00120708	0.00102045	0.00102419	0.000189857	-4.37e-05	-0.00129505	0.000376717	0.000618134
Psammobates_tentorius	TER	-0.0467183	-0.0518617	-0.0258622	-0.0090581	-0.0168333	0.0235534	-0.00213915	0.0128221	0.0115864	0.00712109	0.000555113	-0.00684506	-0.006727	0.00364341	0.00282054	0.000244562	0.00196235	-0.0086731	0.00265695	-0.00330472	0.00770301	-0.000314424	0.00214649	-0.00150307	0.00199751	0.000156216	0.00030955	-0.00106952	0.00397282	0.00373389	0.0016168	-0.000631814	-0.00120761	0.00241498	-0.00334966	-0.00146644	0.000927211	-0.000862983	0.0038429	-0.000880611	-0.00130066	0.000588876	-0.00195038	-0.00173804	-0.000574885	0.000331884	-0.000534165	0.000774148
Homopus_femoralis	TER	0.00802012	-0.0605462	0.0204436	-0.00116941	-0.0296382	-0.00634892	0.00404872	0.00886617	0.0138907	-0.00183895	0.000594561	-0.0112092	-0.00297841	-0.00182329	-0.00652904	0.00112813	0.00606917	0.00758389	0.00599637	0.00154807	-0.000826156	-0.00437987	-0.00580086	0.003817	0.00222962	-0.000732965	-0.00405163	-0.000143918	-0.000755084	0.000931901	0.00246736	0.00209523	0.0010186	-0.00208351	0.00129724	-0.000926887	-0.000725453	-0.00250923	-0.000628116	0.00198428	2.22e-05	-0.00045754	0.00136271	0.00140227	6.64e-05	0.00171078	0.000402299	-0.000371966
Kinixys_belliana	TER	0.0542408	-0.0985141	-0.0278056	-0.0266712	-0.0171855	-0.00815896	-0.0180034	0.00183307	-0.0275604	-0.000923248	-0.00449516	0.00153182	0.00401673	-0.00110378	-0.00516242	0.00744142	-0.00389384	0.0058403	0.00166334	0.00330893	0.00193774	-0.000949552	0.00198352	0.00187991	0.000797402	0.00180432	0.00561932	0.00204675	0.000537817	0.00229604	-0.00418293	-0.000632709	-0.00159104	-0.00214255	0.00113192	0.000611736	-0.00157795	0.000935709	0.0013336	-0.000242819	-0.00069611	-0.000665299	-0.00114784	-0.000680923	-0.00217637	0.0015491	0.000411358	0.000362051
Rafetus_euphraticus	FUA	0.0377368	0.00870077	0.0229896	-0.0138545	-0.0122952	-0.0398416	0.00949315	0.0133915	-0.0210183	0.0127563	-0.0152045	0.0170034	0.00185161	0.00090326	-0.00371438	-0.00141365	0.0116269	-0.0147893	0.0041199	-0.0047262	-0.00383748	-0.000287538	0.00093216	-0.000432715	0.00292999	-0.00289952	-0.000468015	-0.00011482	-8.45e-05	0.00100969	0.00153966	-0.000477452	-0.000977251	-0.00172527	0.00032509	-7.26e-05	0.000718688	-0.000993334	-0.000918253	0.000456361	8.43e-05	0.00115284	9.07e-05	9.22e-05	0.000319446	9.74e-06	-0.00027671	-0.000125191
Platysternon_megacephalum	SET	0.00756571	-0.0246471	-0.060852	-0.0131862	0.0301249	0.00714757	-0.000751088	0.0011303	-0.00382172	-0.00142012	-0.00123221	0.00415218	-0.000283523	0.00289972	0.00273217	-0.0058987	0.00407539	-0.000586089	-0.00104936	0.00145422	0.000412612	-0.00526909	-0.000565381	0.0025486	0.00223226	0.000633297	0.000126247	-0.00113484	0.000761393	-0.000324299	0.0023493	8.01e-06	0.0030128	-0.000103698	-0.000357147	0.00100089	-0.00543309	0.00260137	0.000893781	0.00122359	0.000564784	-0.000207114	-0.00178285	0.00112448	0.000372661	-0.00170927	-0.000474421	0.00182476
Pelodiscus_sinensis	FUA	-0.0279405	-0.0138386	0.0309256	-0.00525572	-0.0164151	-0.00055568	0.00904745	-0.0124656	0.00200373	0.00339714	0.0188038	0.0111558	-0.00858567	-0.00387503	0.00287131	-0.000323236	-0.00925661	-0.00289956	-0.00660829	-0.00359627	-0.00268513	0.00302966	-0.00310638	0.00578492	0.0025914	-0.000905384	0.00151137	0.00371	-0.000720897	0.00227988	0.00275237	-0.000426717	0.00155616	-0.001689	0.0027216	0.00117303	-0.0010127	0.00112055	0.000596013	-0.001081	-0.000804084	0.00251857	4.13e-05	-0.000553935	-0.000765287	0.0018764	-4.62e-05	-0.000119733
Stigmochelys_pardalis	TER	0.0684334	-0.0515495	-0.0467279	0.0230365	-0.00614678	0.0126464	0.00853339	0.00104299	0.00934936	-0.0120866	0.000246863	0.000509662	-0.00567642	-0.00710385	-0.002772	0.00431339	0.00434365	0.00104486	0.00400434	-0.000707373	-0.000201755	0.00613952	0.00647028	0.00509028	0.00133243	-0.00283576	-0.00416856	0.00207436	-0.0025412	0.00422188	-0.000971161	-0.00120706	0.000817482	-0.000318477	0.000677035	0.000527032	0.00207428	-0.000103561	-0.00260647	-9.64e-05	-0.00076206	-0.00112139	-2.11e-06	-0.000844549	0.000634365	-0.00162864	-0.00168268	0.0011556
Dermochelys_coriacea	FME	0.0754184	0.0468574	-0.0533855	-0.0923133	-0.00402075	-0.00964234	0.0259133	-0.0179267	0.00254185	0.0120132	0.00793058	-0.00961338	-0.00273167	0.00832969	-0.00356045	-0.000980682	-0.00495146	-0.000215917	0.00728188	0.00391716	0.00112258	0.00159549	-0.00220677	-0.000261869	0.000368745	-0.000955724	-0.0034143	0.00250113	0.00142661	-0.00163219	0.00124358	-0.000674843	-0.000552127	0.000936712	0.00145093	0.00144688	0.00105294	-0.000274731	0.000624037	-0.000501574	0.000613512	-0.000850796	-0.000510152	-0.000391618	0.000608676	-0.000130685	-0.000818284	-0.000522378
Chelonoidis_carbonaria	TER	0.0344751	0.00112233	-0.049511	0.00887266	-0.0326438	0.0103193	0.0134716	-0.00708993	-0.00172528	-0.0148308	-0.00992208	-0.00147507	-0.000558671	0.0074377	0.00183535	0.00500914	0.00107736	0.00167603	-0.00415241	-0.00471161	-0.00310657	0.000126326	-0.00565173	-0.001654	0.00195055	-0.00254262	0.00427371	0.00390655	0.00136955	-0.00130064	-0.00141996	-0.00197552	0.00198983	0.000229085	-0.000280086	-0.00310528	-0.00145291	0.000276573	-0.000678179	0.00159144	-0.0017253	-0.000748431	-0.000180998	0.000607575	1.76e-05	-0.00261721	0.000251225	-0.000290463
Rhinoclemmys_annulata	SET	0.00851097	-0.048213	-0.00259389	-0.0172181	0.035931	0.00645883	-0.0061849	-0.0159563	0.00176749	0.00876955	-0.00641388	0.00687276	0.000939056	0.00450338	0.00178701	0.00756394	0.0024475	0.0034791	-0.00600816	0.00184437	0.00222631	-0.000134808	-0.00308609	0.00189867	0.00299579	0.0016201	-0.00187803	-0.00104168	-0.00103329	-0.00291377	-0.000384491	-0.00222395	-0.000878976	-0.0024483	-0.00176294	0.00138632	-0.00138533	-0.00427627	-0.00143766	-0.00112655	-0.00226293	0.000633928	0.000145486	-0.00284464	0.00174075	0.000137651	-0.000358938	-0.000636088
Emydura_macquarii	SEA	-0.0368786	0.0354733	0.0353291	0.00493063	0.00236264	-0.00243022	-0.00537972	-0.000377273	-0.000581523	0.00172348	-0.00248642	0.00455285	-0.00269407	0.00215914	0.00279044	-0.000430922	0.00304973	0.000837995	-0.00263245	0.0028041	-0.00149892	-0.000621118	-0.00056011	0.000900491	0.00447112	-0.000783633	-0.000845282	0.000966125	0.000234812	0.000961799	-0.0019168	0.00355194	-0.00143475	0.000741389	-0.00209862	0.000718902	0.000246693	0.00116046	0.000244165	0.000800603	-0.00124135	-0.00173846	0.000902617	-0.00109692	-0.00159875	0.000331383	-0.00186984	0.000229578
Astrochelys_radiata	TER	0.0437593	-0.0288531	-0.0320253	0.0263337	-0.003654	-0.0155177	0.010219	-0.0152489	0.00301742	-0.00294598	0.0166997	0.0154543	0.0121291	-0.00259109	-0.000221203	0.00865119	0.0044065	-0.00141152	0.00242591	0.00275247	-0.0028612	-0.00191339	0.000926281	-0.00315794	-0.00725712	0.00372083	-0.002067	0.00280055	-0.000982689	-0.000436744	0.00280345	0.00348553	0.000197236	0.00196479	-0.00230559	-0.0036639	-0.000652641	-0.000123998	0.000670397	-0.0017325	-0.00014983	-0.000801966	-0.000473035	-0.000837616	-0.000813934	9.86e-05	-0.000720837	0.000424458
Pyxis_arachnoides	TER	0.0678577	-0.0181672	-0.0183689	0.0128789	-0.00368787	0.00590299	-0.0184685	-0.0244755	-0.000348666	0.00357752	0.00132314	0.00110535	0.00362571	0.00644575	0.00162071	-0.00267297	0.00239024	0.00538678	0.000255401	-0.0117808	0.000164539	0.000142039	-0.00559414	-0.00327434	0.00310544	0.000774266	0.00266127	-0.00575242	-0.00138158	-0.00010495	0.00209798	0.00129331	0.00262486	6.88e-05	0.00157175	0.000219587	0.00356982	-0.00048029	-0.000593452	-0.00157249	0.00197153	-0.00137488	-0.000650169	-0.00130348	-0.00113436	3.5e-05	-0.00103834	5.27e-06
Phrynops_tuberosus	SEA	-0.00488271	0.0159827	0.0371773	-0.00282144	-0.00316196	0.00604564	0.00253073	0.00268051	0.00210703	0.00569691	0.00933017	-0.00253682	0.00642531	-0.00106442	0.000934066	-0.000898771	0.00316349	0.00361114	-0.000714855	-0.000945623	0.00305066	0.00308269	0.00398692	-0.000397418	0.00149087	-0.000430418	-0.000471682	0.00242592	0.0012679	0.000409838	-0.00116976	-0.00150808	-0.00214841	-0.00308866	9.25e-05	-0.00126492	0.000385698	-1.5e-05	-0.00112428	-9e-05	0.0012974	-0.00330075	-0.00161284	0.000540347	-0.000146032	-0.000791237	0.000502442	-0.00129266
Podocnemis_vogli	SEA	0.0100357	0.00846291	-0.00108175	-0.00278029	0.0163007	-0.000117092	-0.0074445	-0.00186142	-0.000365933	0.0152881	-0.00707895	-0.0015044	0.00388327	-0.00390479	0.000607235	-0.00224877	-3.7e-05	0.00535006	-6.58e-05	0.00433467	0.00025817	0.00186429	8.77e-05	-0.000749914	-0.00191349	-0.00199084	0.000168219	-0.00208267	0.000698523	0.0021521	0.00158744	-0.00145049	0.00183359	-0.00135985	0.000436956	-0.00403709	0.000961854	0.00258152	-5.25e-05	-4.83e-05	0.000825724	0.000160543	0.0024241	-0.00223475	-0.000491014	-0.000192462	0.00061022	-7.94e-05
Lissemys_punctata	FUA	-0.0362811	0.0238847	0.00411691	-0.00207313	-0.0153908	0.0132917	0.00334724	-0.00358171	-0.00850279	0.0102988	0.0041605	-0.00172008	0.00104264	0.00167274	0.0013026	0.00456816	0.00393086	0.00316078	-0.00032802	0.000657136	-0.00137731	0.00350654	0.0026734	-0.00223745	0.00260032	0.00088217	-0.000273181	-0.000835425	9.7e-05	-0.00305431	0.000941787	0.000520884	-0.00195467	-0.00371514	0.000736547	-0.00130877	-0.00116545	0.00351425	-0.000662352	-0.00304994	0.000384602	3.72e-05	-0.000391558	0.0023989	0.000993998	-0.000554731	4.54e-05	-0.000291368
Chelodina_oblonga	FUA	0.0970031	0.0193926	0.0588406	0.0114344	0.0128266	-0.0014649	-0.0058703	0.00536965	-0.00524762	-0.00121503	0.0167178	-0.000437596	-0.00110994	0.0011647	-0.00530477	0.00103898	-0.00553101	-0.00323333	0.00531849	-0.00145048	0.00512167	-0.000653654	0.00252889	0.00240396	-0.00156709	0.00109711	0.00264397	-0.00240873	0.000214108	-0.000558264	-0.000817706	0.00277913	0.00136919	-0.0005761	0.000569905	0.00102038	-0.00215316	-0.000554993	-0.00257601	0.00178368	0.000386879	0.00228007	-0.000886455	-0.00234051	0.00096023	-0.00160074	0.00053411	-0.000200017
Mesoclemmys_dahli	SEA	0.000298427	0.0201882	0.0521857	0.0124948	-0.00351942	0.00171042	0.000527767	0.00384511	0.00164289	0.00735288	0.00332005	-0.000953897	-0.000993159	-0.00338649	0.00160981	-0.00141656	8.63e-05	-0.00115885	-0.00571428	0.00353845	0.0012302	0.00323709	0.000594767	-0.00013976	0.00176288	-0.00069718	0.00117718	0.000831601	-0.00164578	0.00017228	0.000444088	0.00106488	3.13e-05	-0.00107444	-0.00147519	-0.00134807	0.00028418	-0.000613259	0.00145837	0.00149832	-0.000358845	-0.0014286	0.000975801	6.37e-05	0.00090679	-0.00189685	-0.00139342	-0.00087205
Chersina_angulata	TER	0.03599	-0.0224837	-0.016726	0.015363	-0.00934032	0.00882604	-0.0244771	-0.00571533	-0.00175694	0.0150529	0.000693525	-0.00121357	-0.00276813	-0.00333406	-0.00232213	0.000274678	5.46e-05	-0.00316717	0.00048215	0.00218068	-0.000870189	0.00120405	-0.00154131	0.00168812	-0.0038801	0.00161917	-0.000108279	-0.000388431	0.00273266	-0.00330166	0.000495165	-0.00119037	0.000731859	0.000858653	-0.00130871	6.74e-05	0.000482823	-0.00288262	-0.0016814	0.00161443	-0.000725271	-0.000183386	0.000196693	0.00295053	0.000579398	-0.000595207	0.00155777	0.00159998
Gopherus_polyphemus	TER	-0.0140363	-0.0444272	0.022775	0.0169682	-0.0268185	0.00207766	0.00495191	-0.0109274	-0.00301261	0.00726078	-0.00412278	0.00110728	-0.00217783	0.000813733	0.00343123	-0.00106921	0.000115141	-0.00165287	-0.00366771	0.0026382	0.00471248	0.00185122	-0.00105173	0.00113716	-0.00640022	-0.00524665	-0.00300213	-0.00296701	0.00145321	-0.00113039	-0.000713659	0.00490929	0.00203958	-0.000180899	0.00114784	-0.000461334	0.000492652	0.000880311	0.00113849	0.00143704	-0.00212555	-3.07e-05	-0.00229782	0.000509396	-0.00090411	4.17e-05	0.000762927	-0.00193695
Sternotherus_odoratus	SEA	0.028079	0.0308561	-0.0196631	0.00514589	-0.00432329	0.00466885	-0.0152173	-0.000483779	-0.00961986	0.000588438	-0.00146178	0.0034886	-0.00363189	0.000854294	-0.00117954	0.000670484	-0.00497265	-0.0034339	0.00447939	0.00393077	-0.00322417	0.00092556	-0.000851781	0.00120649	-9.89e-05	-0.0011342	0.000348857	-0.0017689	-0.000992922	0.00033678	0.00107699	-0.00368336	-0.000668178	0.00144931	-0.00060474	-0.00140493	0.000874673	0.00117698	0.00079948	-0.000300774	3.98e-05	-0.00098056	-0.00144447	9.97e-05	0.000264506	0.000602971	0.00202763	0.000163177
Graptemys_geographica	SEA	-0.0234407	0.00507961	-0.000897937	-0.00357531	0.0205152	-0.00172879	0.00859306	0.0125186	0.00837102	-0.0016836	-0.0028546	-0.00250126	-0.00266521	0.00526052	-0.00291171	0.00327224	0.00486374	9.3e-05	0.000919172	0.00161922	-4.62e-05	-0.00134253	0.000244146	0.0018263	-0.000909768	0.000601241	0.0016063	0.000206829	0.000526973	-0.0023078	0.00148128	-0.000534234	0.00057978	-0.000551173	-3.06e-05	-0.00191615	1.24e-05	0.00190923	0.000610058	0.000246637	0.00120389	-0.000578301	-8.26e-05	-0.0018046	-0.000331844	0.00213738	0.00247499	-0.00101377
Clemmys_guttata	SET	-0.0133511	-0.0151489	0.0146072	-0.00679256	0.010062	0.00780169	0.00354379	0.00267382	-0.0013522	0.00293457	-0.00494396	0.000392843	-0.000265136	0.00347604	-0.000155265	-0.00227486	-5.89e-05	0.00568407	0.0022877	-0.0045387	0.00139796	-0.00319028	0.000482281	0.00263019	-0.00330893	-0.00134006	-0.00238395	0.000326224	0.00125846	0.0011516	-0.000618169	-9.69e-05	-0.0016241	0.00108732	9.24e-05	-0.00144845	-0.000334832	0.00143047	-0.00182157	-0.000417889	-0.000260506	0.00108499	-0.00157729	0.000433714	-0.000596736	0.000635326	-0.00021613	-0.00146338
Deirochelys_reticularia	SEA	0.055979	0.00805589	0.0129705	0.0144557	0.00067522	0.00344051	0.00290925	0.00584874	-0.00594761	0.00136845	-0.00216463	-0.00527081	0.0031876	-0.00631312	-0.000570617	0.00205785	0.00017736	-0.00240195	-0.00125285	0.00198485	0.00152142	0.00119569	-0.000665775	0.00263785	-0.000983813	-0.00365378	-7.23e-05	-0.00163689	-0.000212665	-0.00445436	-0.000911583	0.000897571	-4.26e-05	-0.000674989	-0.000798897	0.00173863	0.00183292	0.000991631	-0.00028607	-0.000237068	-8.57e-05	0.000304519	0.000726496	-0.00132769	-0.00054439	4.29e-05	-6.42e-05	-0.000127115
Malaclemys_terrapin	SEA	-0.0331075	-0.00273077	0.0170798	-0.00319695	-0.00445614	-0.00339698	0.0145137	0.0229396	0.00731209	0.0125804	-0.000941534	-0.00654395	0.0123173	-0.00596276	0.00571651	0.00124555	0.000460508	0.00282169	-0.00180484	0.00363329	-0.000106138	-0.00251784	-0.00775473	-0.0011088	-0.00298521	-0.00154715	0.0070486	0.00149215	-0.00247055	0.00451516	0.00162405	-0.000189392	-0.00065052	0.000440251	9.26e-05	0.00271967	0.00160925	-0.000253773	-0.00191853	-0.00109264	-0.000429696	0.000120266	-0.00269099	0.00010058	0.00175427	-0.000787388	-0.000107103	0.000635554
Kinosternon_baurii	SEA	0.0619299	0.0514124	-0.00455442	0.0110505	0.0240719	0.00177224	0.00406205	-0.00536192	0.00581679	-0.000740515	-0.000788538	0.000851932	0.00385092	0.00160962	0.00349278	-0.00169479	-0.0025853	-0.00262789	0.00211247	-5.02e-06	-0.000939012	0.00294298	-0.00079254	0.000848878	0.000797807	-0.00116162	-0.000512609	-0.000283069	0.00143253	0.00254427	-0.00412654	0.000897193	-0.000478002	-0.000363723	8.7e-05	-0.000784448	0.000677516	-0.000926732	-0.00098873	-0.00138822	8.72e-05	-0.00228643	0.000209596	0.00130118	-0.00166483	0.00206696	0.00132341	0.00180537
Emydoidea_blandingii	SET	0.0444447	0.0224303	0.00460998	0.0102629	0.00833069	0.00104004	0.00791677	0.00901571	-0.00926638	-0.00909748	0.00472621	-0.00357926	-0.00119851	-0.00235655	-0.000646729	0.00135441	0.000182682	-0.000371917	-0.00155511	-0.00170352	0.00312411	-0.00173613	0.000523279	0.00152677	-0.0019052	0.000469507	7.92e-05	0.00223404	0.00258927	-0.00235634	-0.000105969	-0.00231642	0.000104252	-0.00135504	-0.000658371	0.000670266	0.000630619	-0.00239304	5.36e-05	-0.000820157	0.000733797	-0.000321475	-0.000877066	0.000262839	-3.83e-05	-0.000724859	0.000237041	0.000496472
Eretmochelys_imbricata	FME	-0.0673717	0.0588985	-0.0120475	-0.00852694	-0.015522	-0.0473375	-0.0206088	-0.00428148	0.0305182	-0.00731377	-0.00178458	0.00914025	0.00931009	0.000219604	0.00133689	0.00508413	-0.00244753	0.00267643	0.00368349	0.00110012	0.00719396	-0.00106675	0.00402835	0.00030267	0.00177196	-0.00251313	0.00218956	-0.000569493	0.00348918	-0.00106617	-0.000328024	-0.00143443	0.00346256	-0.00207688	5.74e-05	0.00214755	0.000755202	0.00117234	4.27e-05	0.000704145	-0.000389015	0.000491221	-0.000134738	0.000949618	-0.000394121	-0.000389662	-0.00057793	0.000404644
Geochelone_elegans	TER	-0.000528154	-0.0301996	-0.032195	-0.00529961	-0.0051423	0.00562544	-0.00625419	-0.00443999	0.0102658	0.0073303	0.00612264	0.00553498	0.00366424	-0.0020631	0.00921528	-0.00254847	-0.00137755	-0.000502205	7.67e-05	-0.00336782	-0.00320619	-0.00384321	-0.00281455	0.00331879	-0.00324685	0.00273338	-0.00424045	-0.00174877	0.000738798	0.000309492	-0.00106217	-0.0017988	-0.00503298	-0.00228336	-0.00178473	0.00255261	0.000936593	0.00236109	4.07e-05	0.00276451	-7.28e-05	-0.000123375	0.00125965	0.000619728	-3.77e-05	-0.000883312	0.000420864	0.00146656
Chelonia_mydas	FME	-0.0543715	0.0445161	-0.00840499	-0.0324361	-0.0203206	0.0013215	-0.00790068	-0.00500711	0.00689046	-0.00226237	-0.00880887	-0.001535	-0.000774116	0.00171487	-0.0103797	0.0111481	0.00344389	-0.00135509	-0.00497642	-0.00347242	0.001371	0.00127661	-0.000335725	0.00305796	-0.00407874	0.0039264	-0.000794685	-0.00086229	-0.00256322	0.00216359	-0.00135101	0.00127082	-0.000180817	0.000979169	-1.85e-05	0.000896549	-0.000355273	0.0006106	0.00228006	-0.00273878	-0.000501841	0.000788629	0.00214162	0.00046385	0.00150549	-0.00175022	0.00190294	-0.000422929
Actinemys_marmorata	SEA	-0.0521977	-0.00839121	0.0328837	0.0078447	0.0135869	-0.000313573	0.000915562	0.0138681	-0.00328968	-0.000889542	0.00246556	5.01e-05	-0.00442625	-0.00254162	0.00294104	0.00163271	-0.000594398	0.00204123	0.00300429	0.00209638	5.29e-05	0.00199856	-0.000630968	0.00235198	0.00190902	0.00195163	-0.000695728	-0.000290407	-0.000719056	-0.00288955	0.000879478	-0.0029182	0.00272937	-0.00165713	-0.00207361	-0.00218522	0.00210594	-0.000226791	0.00130967	-0.00254811	-0.000697588	0.000138541	-0.000137994	0.000565788	-0.000897081	-3.88e-05	-0.000735748	0.000340637
Terrapene_carolina	TER	-0.00767704	-0.00278867	-0.0140906	0.0207693	0.00412259	0.0177827	0.00615184	0.00487564	-0.00494214	0.00612908	0.0048989	0.00300807	-0.00492534	0.00217341	0.00317955	0.00352667	-0.00260195	-0.0025193	0.00253405	-0.000133199	-0.00132954	0.000601311	0.00299068	-0.00232614	0.00163465	0.0015721	0.00207118	-0.00131564	0.00147156	-0.00119531	-0.000329177	-0.000202287	0.00281597	0.00114473	2.55e-05	0.00136597	0.000391723	0.00128145	-0.00190709	-0.000875473	-0.00370162	-0.00057565	0.000185886	0.0028674	0.0015783	0.00188832	-0.000737852	-0.00132668
Testudo_graeca	TER	-0.0160483	-0.0201183	0.00767252	0.0441606	-0.0263464	0.0106044	0.00985759	0.00524966	0.0134807	0.00203441	0.00262551	0.00280013	-0.0040737	0.000559749	0.00310264	0.00602243	0.00124498	-0.000836525	0.00656965	0.00388027	-0.006407	0.0026189	-7.09e-05	-0.00487356	-0.00110294	-0.00176023	0.00196415	-0.00456927	-0.000731282	-0.00147616	-0.00190285	-0.00360383	-0.00110121	0.000407758	0.00236565	0.0034797	-0.0036863	-0.00119101	0.0024311	4.66e-06	0.00265889	-0.000521439	0.000318599	-0.00187214	0.00016644	4.96e-05	-0.000218101	-0.000110351
Hydromedusa_tectifera	FUA	0.033534	-0.00883519	0.060434	-0.0102465	0.00168702	-0.00743713	0.00560722	-0.00614049	0.00174132	0.00318552	-0.00403799	-0.00744221	-0.00132402	0.000824341	0.00246313	0.00296835	0.00275875	-0.00424515	-0.00266418	-0.00209512	0.000847353	0.00487222	-0.00144827	-0.00214626	-0.000127442	0.00198991	0.000842494	0.00328248	0.00276198	-0.00210628	-0.00156472	0.00307515	-0.00194626	0.00108545	0.00142957	0.00242401	-0.00121721	0.00184005	0.000929991	0.00066172	0.000655566	-0.000507916	0.000883033	-0.000283302	-0.000678794	-0.000711734	-0.00047283	0.00210924
Orlitia_borneensis	SEA	0.0483211	0.0442757	-0.0155156	0.00972593	0.0069083	0.00278949	-0.00142193	-0.00771776	0.00161794	-0.0109423	0.00608712	0.0017143	0.000272738	0.00634008	0.00585911	-0.00279788	0.00103846	-0.00153079	0.000846165	0.000248433	-0.000439059	-3.06e-05	-0.000820221	0.000701895	0.00159445	-0.00401101	-0.000103669	-0.000525416	-0.00229836	0.00152397	-0.00352907	0.000706567	-0.00246948	0.000354241	-0.00108284	-0.00142944	-2.84e-05	0.00152414	0.000204665	0.00081931	-0.000246708	0.00106808	-0.00121843	-0.000992004	0.00222884	-0.000594017	0.00251507	-0.00164515
Cuora_amboinensis	SEA	0.0135039	0.0417794	-0.0366783	0.00830712	-0.00173304	0.00843473	0.0101174	0.00461371	-0.00723746	-0.00312458	-0.00268473	-0.00120202	0.000252767	0.000143576	0.000643255	0.00160802	-0.000265554	-0.00096276	-0.000431979	0.0030841	-0.00179469	-0.00573095	-0.00236614	0.000671305	0.000420639	-0.000929017	-0.000358958	0.00173898	0.004286	-0.000312062	0.000672349	0.000939521	0.00344664	0.00148398	0.00169895	0.000804804	0.00131953	0.000689127	-0.000312987	-0.000647946	-0.000238336	-0.000222349	0.00134325	-0.00141612	0.000269936	-0.000326086	-0.000156061	0.000751663
Notochelys_platynota	SEA	0.0170564	-0.0231521	-0.000258899	-0.02499	0.00342402	-0.0172452	0.0109265	0.00903924	-6.48e-05	-0.0127459	-0.00213196	-0.00347256	0.00404876	-0.00189449	0.0056751	-0.00149888	-0.00197166	-0.0045481	-0.000485569	-0.0042083	1.76e-05	0.00360044	-0.00292502	0.0017552	-0.00314345	0.00272169	0.000224819	-0.00328053	0.00107825	-0.0008173	-0.00403729	0.000269802	0.00155715	-0.000147333	-0.00285939	-0.000302798	-0.00175443	-0.00185889	0.00079818	-0.000589543	0.00200946	-0.000497725	-0.000118349	0.00141611	0.000950821	0.00198611	-0.00244704	-0.00228687
Cyclemys_dentata	SEA	-0.0616475	-0.0160746	0.0127699	-0.0171255	-0.00980813	-0.0189851	0.000268051	0.00517383	0.00225443	0.00150682	0.0114059	-0.00293137	-0.000744015	-0.00084637	-0.000254679	0.00143732	0.00189127	-0.00380626	-0.00495451	0.00377363	-0.001295	0.000619735	-0.00292729	-0.00740732	0.00529888	0.00473229	-0.00454003	-0.000529729	-0.000591625	0.00100257	-0.00488743	-0.00115694	0.00318499	0.00258127	0.000176613	-0.00132407	0.000614554	-0.00033201	-0.00312015	0.00168753	-0.000450681	0.000885162	-0.000808405	-0.000891702	-0.00120529	0.000458261	0.00223522	0.000748961
Batagur_dhongoka	FUA	0.00621265	0.0250764	-0.00548087	-0.00120632	0.0117635	0.000944905	-0.0183618	0.0074807	-0.0018639	-0.00297545	0.00241434	-0.00573158	-0.00610186	-0.00577218	-0.00286604	-1.33e-05	-0.000240922	-0.00308336	-0.00584384	0.00174204	-0.00153739	-0.00175717	-0.000369417	-0.00144996	-0.000386575	-0.00193977	0.000157787	0.00154688	-0.000143899	-0.000804831	0.00171793	0.00137315	0.000219336	-4.93e-05	0.00088943	0.00204637	-0.000299285	-0.00139823	0.000675838	-0.000616302	-3.22e-05	-0.00318881	0.00042878	-0.00105567	-0.0012387	-0.00034938	0.000126906	-0.000996152
Vijayachelys_silvatica	TER	0.0470184	-0.0358202	-0.0217276	-0.0144549	0.00508737	0.00164972	-0.0227805	0.00278745	0.0108121	0.00164649	-0.00751517	-0.00394594	-0.00457595	-0.00742139	0.00381844	0.000106151	-0.00395727	-0.00383427	0.00251004	-0.00168397	-0.0015293	-0.00374299	0.00168027	-0.00579721	-0.00186133	0.000791218	0.00110415	0.00336513	0.0016806	-0.00127526	-0.000546386	-0.000671964	-0.00196698	0.000708946	0.00175009	-0.00151148	0.000821696	0.00162676	-0.00168819	0.00102384	-0.00114969	0.000619953	0.00200953	-0.00109507	0.000483678	-6.09e-05	-0.00177278	-0.0026865
Melanochelys_trijuga	SEA	0.0319053	0.00475344	0.00832307	0.00110337	0.0161217	-0.00819978	-0.00215227	-0.0070361	0.00998469	-0.00413436	-0.0059927	-0.00358486	-0.0037078	-0.00027046	0.0038726	-0.0036055	0.000680959	-0.000479532	-0.00357959	-0.000387338	-0.000888456	0.00749395	-0.00078213	-0.000398313	-0.00368065	-0.0002764	0.000934083	0.00332437	0.00190226	5.86e-05	0.00170164	-0.00262937	-0.00112302	-0.000998831	-0.000168086	-0.00217278	1.37e-05	-0.00139131	-2.92e-05	-0.000185662	0.000847899	0.00327265	-0.000596078	0.000181089	-0.00162911	-0.000136317	0.000120685	0.00151543
Caretta_caretta	FME	-0.0502171	0.0539106	-0.0342567	-0.0569319	-0.0186877	0.00464731	0.00589318	0.00486947	0.00234139	0.00869834	-0.00413289	6.21e-05	-0.000985736	-0.0124514	0.00691672	-0.00365852	-0.00176522	0.00656664	-0.000727113	-0.00591097	-0.00353239	-0.00172624	0.00797854	-0.000193675	-0.00132469	-0.00225474	4.22e-05	-0.0022495	-0.00301716	-0.00167032	-0.00114914	0.00134101	0.000908817	0.00142504	-0.000310564	-0.00160114	-0.00383781	-0.0030398	-0.00162112	-0.000770509	-0.000895364	-3.5e-05	-0.00070721	-0.00118331	-0.00125299	-0.000238329	0.000569457	0.000843767
Dogania_subplana	FUA	-0.0487021	-0.0171249	0.0935774	0.00797478	-0.0212894	-0.0079697	0.00998548	-0.0206074	-0.0146795	-0.00728521	-0.000525462	0.00629387	-0.000658047	-0.00272989	0.00422393	-0.000364923	-0.00157118	0.00610164	0.000840603	-0.00331848	0.00493679	-0.00506416	0.00137411	-0.000582591	6.68e-05	-0.00382276	-0.000424908	0.00249963	0.00088394	-0.00176189	0.00196453	-0.00385429	-0.00188751	0.00429462	-0.00123685	0.000678408	0.00048975	-0.0013248	0.000204633	0.000479446	0.000797634	-0.00112968	0.00155752	-1.89e-05	0.000758552	0.000914022	0.00147917	0.000186691
Heosemys_spinosa	SEA	-0.0499063	-0.0479794	-0.0130306	-0.0191733	0.00870981	-0.00279006	-0.00252034	-0.0104933	-0.0101295	-0.000930212	-0.00362677	0.00174669	-0.00535792	0.000141252	0.00391087	0.0017899	-0.000186936	0.00247054	-0.0044905	0.00355856	0.000384667	-0.00134675	0.00483497	-0.00140289	-0.00038423	0.000251579	0.000125367	0.000120641	-0.00155174	0.000360865	-0.00259479	0.00210591	0.000691201	0.000237511	0.00322025	-0.00106795	0.00436301	-0.00117306	0.0015314	0.00172287	0.00364123	0.000477641	-0.00157018	0.00114099	0.00320689	0.000478637	-0.000865171	0.00151009
Chelus_fimbriata	SEA	5.86e-05	0.013205	-0.0112229	0.00572706	-0.0182528	0.00688269	0.0107558	0.00310666	0.0106017	-0.00747124	-0.00556858	0.00806099	-0.00691676	0.00490139	-0.00196942	-0.00367846	-0.00790909	-0.00922108	-0.00338238	0.00434403	0.00885959	-0.00589942	-0.00163985	-0.00155232	-0.000713222	0.00167814	0.00180361	-0.00267057	-0.00383286	-0.000776219	0.000946477	0.000381192	-0.00355995	-0.0030983	0.00300272	-0.003769	-0.00105493	-0.000954785	-0.0023141	-0.000998174	0.000566341	-0.00146989	0.000930826	0.000626782	-0.000549971	0.000390768	-0.000827021	0.00143414
Macrochelys_temminckii	SEA	-0.0281589	-0.0154794	-0.08547	0.0271857	-0.00587167	-0.000617782	-0.0124355	0.0353218	-0.00995578	0.00580922	0.00387908	0.00148668	0.0136051	0.00848951	0.0012472	-0.00129523	-0.00834525	0.00125541	-0.00135759	-0.00483609	0.00589558	0.00629287	-0.00131364	-0.000807165	0.001997	-0.00246883	-0.00470084	0.00372539	-0.00295642	-0.00198022	0.00106839	0.00114129	-0.000473074	0.00208959	0.00103124	0.000283711	-0.00101319	-0.000669155	0.000727701	0.000393629	0.000907687	0.000280106	0.0021373	-6.75e-05	0.000745822	0.000630754	0.000442015	0.000305385
Malacochersus_tornieri	TER	0.0084689	-0.0519879	-0.000892402	-0.014086	0.0109902	0.0135237	0.00121635	-0.0115241	-0.00224878	0.00122572	0.000801603	-0.00356155	0.00123961	0.00544405	0.00969799	-0.00203146	0.00213264	-0.00451402	0.00416758	0.00462258	0.00174791	-0.00140548	0.00344528	-0.000682387	0.00109721	-0.000382722	0.00345304	0.00260273	-0.00293862	0.00320151	0.000706368	0.00142953	0.0025861	-0.000341685	-0.00224067	0.00184088	-0.000575297	-0.00178897	-0.000572521	-0.00092393	0.00245133	0.00140426	0.00367088	0.00227176	-0.00233442	-0.00155882	0.00170046	-0.00205124
Malayemys_subtrijuga	SEA	-0.0388852	-0.0157037	0.00612036	-0.0069611	-0.00546245	0.00808812	-0.0125041	-0.00533629	0.0083456	-0.00332989	-0.0111122	0.00531602	-0.00133663	-0.00379023	0.000223861	-0.00060753	-0.00453023	-0.00312122	0.00288422	0.0033364	-0.00410297	0.00231274	-0.00187564	0.00606166	0.00484378	-0.00215419	-0.000361153	-0.000943326	0.000130531	-0.00213249	0.000519779	0.00400355	-2.71e-05	0.00217496	-0.00218291	3.72e-06	-0.000245749	0.000469091	-0.000191593	-0.000960827	0.00214829	-0.000592561	-0.000965028	-0.000138845	0.000339794	-0.000199853	0.000541373	0.000521318
Indotestudo_elongata	TER	0.117481	0.00562592	-0.0146084	0.0210075	-0.0330837	-0.00313353	0.00295685	-0.00316824	0.00268419	0.00330927	0.000833068	-0.00105847	-0.00286006	-0.0121443	-0.00751062	-0.0106196	0.00304043	0.00199272	-0.00553547	-0.000394003	0.0049501	-0.00155323	0.000417154	-0.00199249	0.00314062	0.00321099	-0.000282782	-0.000749708	0.00157116	0.00125272	-0.000644113	-0.00106769	0.000875759	0.000433543	-0.0039516	0.000836302	-0.000745123	0.00199392	3.42e-05	-0.00202313	0.00205401	0.000610843	0.000384412	-2.51e-05	0.00181814	0.000500102	0.000666292	-0.000393482
Pangshura_tentoria	SEA	0.01929	-0.00651144	-0.0212211	-0.0138825	0.0237086	-0.00845879	-0.01039	0.0125225	0.00743079	-0.00901066	0.00624838	0.00220857	-9.46e-05	-0.0105403	-0.0012442	0.0013828	0.00255302	-0.00184253	-0.00371914	-0.00131122	-0.00274954	-0.00290815	-0.0041393	0.00281801	0.00105425	-0.00152312	-0.000253599	-0.000568281	0.000155497	-0.000696508	-0.000554797	-0.000519029	-0.00287497	0.00269564	0.00250052	0.000277462	0.00109932	0.000547217	0.00029629	-0.00189723	0.000758294	0.000286028	-0.00067512	0.00183758	-0.00124557	5.18e-05	0.000366948	-0.00179872
Morenia_petersi	SEA	0.0645496	0.025796	0.0170375	0.0111759	-0.00787928	0.00739874	-0.0100279	-0.00693661	0.00866586	-0.00771731	-0.0052746	-0.011987	0.00411571	0.00211923	-0.0023721	0.00191989	-0.000477864	0.00142591	0.00155753	-0.000616457	-0.00343009	0.00062462	0.00294972	-0.00489899	0.0021224	-0.00153441	0.000968202	-0.000291699	-0.00175209	-0.000772802	0.00229203	0.00283186	-0.002619	-0.0011128	-0.000434276	0.000994361	0.000588458	-0.00131785	0.000251992	-0.000482279	-0.00194231	0.00318882	-0.000860742	0.00127427	0.000124528	0.0021325	0.000543596	0.00116859
Geoemyda_spengleri	TER	-0.0152199	-0.0450156	0.0122977	-0.0090846	-0.0123394	-0.0324889	-0.00729084	0.00546141	-0.00926954	-0.0121807	0.00614445	-0.00991544	-0.00366683	0.011774	0.00216197	-0.0107486	-0.000407979	-0.000389746	-0.00206393	0.00147089	-0.00417909	-0.00194361	0.00149611	-0.00141449	-0.00506728	-0.00264359	-0.00263895	-0.00268309	-0.00235255	7.14e-07	-0.000736295	-0.0016149	0.00101906	-0.0023867	-0.00125183	0.00212932	0.00130736	0.00119691	0.000278342	-0.00298285	-0.00250502	-0.00062164	0.000956299	-0.000806462	0.000140456	-0.000843087	-9.75e-05	0.00109543
Manouria_impressa	TER	0.00213131	-0.0383945	-0.0325005	0.00136947	-0.00556995	-0.0145189	0.0190448	0.00644131	-0.00049946	-0.00981526	-0.00157521	0.000732895	0.00708883	0.00429019	-0.000213624	-0.00359132	-0.0045291	0.00440816	-0.00729639	0.00475564	-0.00513365	0.0036138	0.00661793	0.00204792	0.00303787	0.00387687	0.0019777	-0.00539803	0.00563324	0.000664983	0.00470825	0.00101462	-0.00306513	0.00177887	0.00101195	5.12e-05	0.00125901	-0.00121582	-0.000936125	0.00097819	-0.000368697	0.000438603	0.000859304	-0.000491299	0.000159787	-0.000739551	0.000634718	-0.00121179
Platemys_platycephala	SET	0.0518545	-0.0053108	0.0577008	-0.0244724	0.00710233	-0.0121981	-0.00340236	0.00237691	-0.00480187	-0.00305887	0.00618114	-0.00815389	0.00152157	0.000196394	-0.00227323	0.00415459	-0.00210905	0.0040826	0.00118764	0.00177854	-0.000501288	0.000633987	-0.0022525	0.000106995	0.00243397	-0.00201838	0.00147598	-0.00268004	-0.00344727	-0.000305817	0.001017	-0.00088622	-0.00116162	0.00283826	-0.00318287	-0.00360288	-0.00194261	0.00229432	0.000735095	0.0020546	-0.000512388	0.00081101	0.000971753	0.00103695	0.000213664	9.7e-06	-0.00236235	0.00123565
Trachemys_scripta	SEA	0.0182262	-0.0288368	0.0439154	0.00523486	0.0100154	-0.00818669	0.0104724	0.00469075	0.0107627	0.0018178	-0.0159661	0.00609935	-0.003236	0.00290143	-0.00676747	-0.0077683	-0.00821248	0.00344998	0.00300871	-0.00276187	-0.00143644	0.0030671	0.00129329	-0.0017043	-0.00110644	0.00638234	0.000522122	0.00305481	-0.00450853	-0.0012453	0.00147677	0.000275609	0.000891618	0.00120263	-0.00133454	0.00260007	0.000628217	0.00123882	0.000189864	0.0012127	-0.000877714	-0.00227366	-0.00212182	0.000200117	-0.00104042	-0.000912498	0.00108567	-0.000599749
Glyptemys_insculpta	SET	0.0247243	-0.0527972	0.00470347	0.00286836	0.0270794	-0.00229496	0.0137401	0.00590918	0.0132912	0.00204224	0.00108582	0.00284287	-0.00114343	-0.00360192	-0.000474395	-0.00631562	0.00691572	0.00322386	0.000125879	-0.00403151	0.000773105	0.000977425	0.00169973	-0.00107807	-0.00051545	-0.000139097	0.00134996	0.00062096	-0.000897749	-0.00215374	-0.001646	-0.000147947	0.00202312	-0.000840088	0.00418621	-0.00117636	-0.000693218	0.00163897	0.00267396	0.00071353	-0.000915389	0.000502908	0.00145884	0.000204564	0.00106132	0.000912145	0.00124599	0.000703735
Chrysemys_picta	SEA	-0.0355242	0.015533	0.0267103	0.013825	0.0116836	0.00991299	0.000211744	0.00445491	0.00445144	-0.00339217	0.000613556	-0.00242153	-0.000345251	0.0108477	0.00199651	0.0039049	0.0083463	0.00236334	-0.00156974	-0.00164871	0.00141256	-0.00294933	0.00193975	0.00028741	0.00127168	0.00180426	-0.00278319	0.000717153	0.00101195	0.000815881	0.000804708	0.000266646	-0.00190971	-0.000881567	-0.000160061	0.00164003	-0.00121277	0.000525837	-0.00137807	0.000488676	0.000558154	3.12e-05	-0.000968516	-0.000167235	-0.00100285	0.000830307	-3.02e-05	-0.000507512
Proganochelys_quenstedti	UKN	-0.130366	-0.0243076	-0.0442767	0.0675596	0.029348	-0.0328006	0.0140755	-0.0274387	-0.00281988	0.0112352	-0.00168042	-0.0210758	0.00283758	-0.00412803	-0.00778585	0.00178524	-0.0070414	-0.00655402	0.000615143	-0.00443818	-0.0016002	-0.00370084	0.00176895	0.00163192	0.00207362	-0.00127832	0.000137007	-7.75e-05	-0.000375868	0.00077521	-0.00107896	-0.000519972	-0.00098413	-0.000434174	-9.28e-05	-0.000921088	-0.00150183	1.53e-05	-1.72e-05	-0.000247913	0.000249203	-0.000255313	-0.000360329	9.29e-05	-4.56e-05	-0.000642109	-0.000242995	-0.000243686
Proterochersis_robusta	UKN	-0.0851858	0.0357509	-0.0450799	0.00200629	0.0202777	-0.0120484	0.00309501	-0.00822107	-0.0201733	-0.0140692	-0.00310705	0.00188692	-0.00840688	-0.0127972	0.00441422	-0.000280918	0.0032309	0.00409885	0.00796346	0.00102285	0.00710965	0.00718561	-0.00641293	-0.0043513	-0.000394198	0.00262215	-0.000914708	-0.00299528	7.11e-05	0.00221016	0.00255779	0.00128655	-0.00199208	-0.000578552	0.0011258	0.00135852	-0.000872966	5.1e-05	-0.000255531	0.000786504	-0.00163943	4.95e-05	0.000383083	8.03e-05	-1.71e-05	-0.000693308	0.00057744	-0.000349601
Plesiochelys_bigleri	UKN	-0.0833605	-0.0323078	0.0148094	-0.0333695	0.0226928	0.0360363	0.00952397	0.00152504	0.000977167	-0.00617055	0.00433727	0.0117439	0.00511159	-0.00175416	-0.0169643	-0.00156367	-0.00569092	0.000336412	-0.000834394	-0.00196989	-0.00287295	0.00108556	-0.00219704	-0.00708701	-0.00163041	-0.00614758	-0.000399857	-0.00143802	0.00352759	0.00163067	-0.00109251	0.000442506	0.000338836	-0.00311864	-0.00286173	0.000617962	0.000398707	-0.000532683	1.78e-05	0.000934782	0.000586455	0.000294064	0.000844741	0.000588852	-0.000235816	-0.000366877	-5.12e-05	0.000323133
[truncated: 24 more columns]

## Sheet: pca_SET3
species	ecology	Comp1	Comp2	Comp3	Comp4	Comp5	Comp6	Comp7	Comp8	Comp9	Comp10	Comp11	Comp12	Comp13	Comp14	Comp15	Comp16	Comp17	Comp18	Comp19	Comp20	Comp21	Comp22	Comp23	Comp24	Comp25	Comp26	Comp27	Comp28	Comp29	Comp30	Comp31	Comp32	Comp33	Comp34	Comp35	Comp36	Comp37	Comp38	Comp39	Comp40	Comp41	Comp42	Comp43	Comp44	Comp45	Comp46	Comp47	Comp48
Dermatemys_mawi	SEA	-0.0101956	-0.02979	-0.00967544	-0.0261147	-0.0115617	0.000366565	-0.00110378	0.00431514	-0.0129318	0.0114944	-0.00172923	0.00459636	-0.00241648	0.0018485	0.00953047	-0.000118356	0.00157873	-0.00584935	0.00436882	-0.000234201	0.00510214	-0.000295235	0.000932282	-0.00270976	0.00079917	-0.000369917	0.00293099	-0.00162817	0.00348367	0.000350335	0.00301459	-0.00221887	0.000436414	0.00177387	0.000893257	-0.00123656	-0.00136769	0.00104472	0.0011973	0.00175489	0.000212078	-0.001826	-0.000513888	-0.000292606	-0.000144392	-9.78e-05	-0.000669626	-0.00121172
Staurotypus_triporcatus	SEA	0.0082045	-0.00151782	0.00539507	0.00617764	0.00228958	-0.000668006	-0.0119816	-0.0122755	-0.0142304	0.0180805	-0.0102066	-0.015325	0.000144737	0.00438494	-0.0046569	-0.00746823	-0.00246511	0.00545369	0.000736527	-0.000276022	-0.00571958	-0.00317001	-0.00495446	-0.00419887	0.00334331	0.00270075	0.00446293	-0.000154537	0.00334495	-0.000640349	-0.00121581	0.00155852	0.00238876	-0.00231241	-0.00127356	-0.000753412	-0.00148919	-0.00197983	-0.00109879	-4.01e-05	-0.000303854	0.00082397	0.000438201	-0.000683253	-0.000676363	-3.1e-05	0.000710887	-0.000502226
Claudius_angustatus	SEA	0.043401	0.0236383	0.0125756	-0.020914	0.00364186	-0.0197922	-0.0290916	0.0373918	0.0129338	0.00361125	-0.000471136	-0.00349094	0.00397405	0.0105449	0.0022312	-0.0035068	-0.000125339	0.000945597	-0.00342969	-0.000541556	-0.00244758	0.00264636	-0.00340967	-0.000260648	0.00136166	-0.00419371	-0.000920338	0.00263625	-0.00233368	-0.00433405	0.000663349	-0.00065028	0.000414793	-0.000738814	-0.000132399	-0.00124809	0.000196442	-0.000732329	0.000835489	0.000740057	0.00125293	-0.000411429	0.000291242	-0.000153807	0.000489084	4.59e-05	0.000960703	0.000465376
Sacalia_quadriocellata	SEA	-0.0453956	-0.0638408	0.0434011	-0.0135189	-0.0124456	0.000608489	0.0130184	-0.00498897	-0.0102271	0.00335528	0.0051105	0.00723481	0.00162299	-0.0034821	-0.000466078	0.00318759	-0.000513651	-0.00221592	-0.000167805	0.00608661	-0.000672909	-0.00565169	0.00133599	0.00384229	0.00175037	-0.00150794	0.0013612	0.00132783	0.00223073	-0.00180241	-0.00100513	0.000561786	-0.00035657	-0.000400649	0.00146833	0.000421352	-0.000203322	2.67e-05	-0.000160107	-0.000165545	-0.000561034	-0.000342827	-0.00163618	0.000629138	0.000341326	4.19e-05	0.0013709	0.00103804
Mauremys_reevesii	SEA	0.100225	0.0194526	0.000984891	-0.00471019	0.00167398	0.000982166	0.00197889	-0.000791969	0.00130738	0.0103035	0.00485061	-0.00277426	-0.00470687	-0.00325148	0.00018425	-0.00247577	-0.00230065	0.00270607	0.000807843	0.00228675	-0.00194242	0.00267721	0.00223784	-0.00187959	0.0011943	-0.00138571	-0.000885506	-0.000579902	-0.00157081	0.00150719	-0.00240021	-0.00257716	-0.00146108	0.00136574	-0.00269373	-0.000265593	-0.000354572	0.00138416	0.00229517	-0.00368689	-0.000344214	6.61e-05	-0.000375427	-0.000122616	0.000681164	-0.000263212	0.00117593	-3.05e-05
Apalone_mutica	FUA	-0.290097	-0.0276901	-0.00940705	-0.0116767	0.0113471	-0.00957074	-0.0118048	0.000431743	-0.0057958	0.0045001	-2.68e-05	0.0056374	0.0105779	-0.0136839	-0.0010052	-0.000639001	-0.00380283	-0.00430857	0.000292862	-0.00212743	-0.000552111	0.00281185	0.00172611	-0.00131251	0.00234264	0.000596786	-0.002693	-6.78e-05	-0.0013499	0.00351614	0.0011761	-0.00138078	0.000530081	-0.00185046	-0.000350316	0.00012396	0.0012461	-0.000996996	0.000189967	0.0017522	0.000961699	0.00115735	0.000341035	0.000850109	0.000972055	0.00142158	0.000336256	1.22e-05
Pelusios_sinuatus	SET	0.0765606	-0.0112567	0.00959142	0.0181782	0.00699358	-0.00498715	-0.0107439	0.00270295	-0.00447747	-0.0056844	-0.00439233	0.000471756	-0.00208502	0.000132113	-0.00119597	-0.00239644	-0.00181572	-0.00220238	0.000431535	0.0028577	-0.000474785	0.00111899	-0.00058055	-0.0027608	0.000737536	0.00178264	-0.00191819	-0.000503199	0.000117266	0.00302025	0.000716478	-0.00243791	-6.89e-05	-0.000616901	0.000311364	0.000690912	-0.00120075	-0.000456939	0.000955707	-0.00055621	-0.000418613	-0.000507924	-0.0004437	0.00125464	-6.34e-05	-0.000679906	-0.000946479	-9.35e-05
Elseya_novaeguineae	SEA	0.000687313	0.11791	0.0136493	-0.0205434	0.000912365	-0.0122074	0.00378194	-0.00221229	-0.00303752	0.00145813	-0.00218878	0.00151124	-0.000647535	0.00144533	-0.000371815	-0.0019609	0.00248815	0.000516556	-0.00350702	0.000980183	0.00153753	0.00138914	0.00180588	4.8e-05	-0.00113016	-0.000968253	0.00116842	-0.00263776	0.00194936	-0.00180846	0.000314161	0.000395592	-0.000615264	0.00306204	-0.000471659	0.00120714	0.000682209	-0.000302668	-0.00039671	0.000575839	0.000320056	0.00118278	0.000764821	-0.0016831	-0.00081544	-0.000136631	-0.00021733	-0.000582732
Chelydra_serpentina	SEA	-0.157017	-0.0658851	0.0323886	0.0534013	-0.00523593	-0.00232235	-0.0163934	0.0243893	0.000944707	0.0199867	-0.00256571	0.00337872	-0.00042991	0.00618473	-0.00655543	0.00618103	0.00410438	0.00855628	0.00453982	-0.00435506	0.0043635	-0.0066063	0.00407281	0.00285693	0.000754621	0.00103997	-4.44e-05	-0.00118789	0.000466468	0.000497063	-0.00168096	-0.000893692	0.00116475	-2.71e-05	-2.86e-05	0.000418593	0.00218242	0.000738944	-0.000544272	-0.000307105	0.000937876	0.000929063	0.000336918	-0.000362345	0.000220506	-0.000192926	-0.000830168	-0.000679374
Carettochelys_insculpta	FME	0.0533416	-0.0965563	0.0353024	-0.00919705	-0.00782931	-0.00175634	-0.0131304	0.00259726	-0.0086931	-0.00678036	-0.00116302	0.0019023	-0.000262718	0.000239736	-0.0036038	0.000291195	-0.00654919	0.00150462	-0.000580971	0.00171984	-0.000942522	-0.00252544	-0.00108962	-0.000622387	-0.00187729	-0.00387931	-0.00171579	0.000691305	0.000320513	0.000976398	-0.000813837	-0.00033955	4.36e-05	0.00129053	-0.0024991	0.00220557	-0.000288771	-0.00154321	3.98e-05	0.00139621	-0.00038084	0.000304722	-0.000739896	0.000169482	0.00027426	-0.00200503	-0.000748596	0.000793777
Emys_orbicularis	SET	0.0440323	-0.0155882	-0.0186178	-0.0251236	0.00539593	-0.00191174	0.0068133	-0.00891759	-0.0118482	-0.00744692	0.00156954	0.00348535	0.00433377	0.00516434	-0.00151343	0.00571185	0.00368896	0.00313204	0.00525425	-0.00184824	-0.00546932	0.00307465	0.00158672	-0.000358994	-0.00179538	-0.00359698	0.0016018	-0.000254274	0.000390647	-0.00258336	-0.00113669	0.00166182	0.000151879	-0.000226433	-0.000201193	0.000927708	0.000807715	0.000654626	-0.0010677	-0.000214339	-0.00150686	-0.000448479	0.000417016	0.000863655	0.00180443	0.00109234	0.000399616	-0.00192897
Pelomedusa_subrufa	SEA	-0.0286718	-0.0388526	-0.0380383	0.0281513	0.027723	0.00585976	0.00770631	0.00490006	0.00141999	0.00822587	-0.00555881	-0.00729913	-0.00713613	-0.000774552	0.00109441	-0.00324303	-0.00245659	-0.000806588	-0.000300666	0.00036873	0.00616086	-0.00236683	-0.00319737	0.0005025	0.00191012	-0.00114656	0.000739712	0.00163921	-0.000603278	0.000736926	-0.00182078	-0.00151184	-0.00201788	0.001379	0.00133501	-7.54e-05	-0.000850733	0.00182603	-0.000282107	0.000248211	-0.0024343	0.000271386	0.000215251	0.00155456	-0.000377722	0.00109318	0.000755684	0.000322171
Psammobates_tentorius	TER	0.161053	0.0316108	0.0677814	0.00962241	-0.0243062	0.0097402	0.0170022	0.00227995	-0.0063793	-0.00562837	0.0194569	0.00381333	0.00093887	-0.00479077	0.00385077	-0.0130117	-0.00267744	-0.00129362	0.00133424	-0.00667059	-0.00225534	-0.00706952	-0.00109845	-0.000330885	-6.61e-05	-0.000453161	-0.00424302	-0.000865984	0.00063178	-0.00134006	0.000892475	1.37e-05	9.1e-05	-0.00105087	0.0022288	-0.000662713	0.000565957	-0.00104791	-0.000745496	-0.00192081	0.000952394	-0.000185654	0.000732405	0.00122174	-0.000647779	0.000744325	-0.000330209	-0.000390715
Homopus_femoralis	TER	-0.00808042	0.0504195	0.0224218	0.0109522	0.0144941	0.00448673	0.0124853	-0.0021213	-0.00189559	0.0165413	-0.00383614	0.0102003	0.00713867	0.000400901	0.000956809	-0.00318772	-0.00249298	0.000874034	-0.00401662	0.00347421	0.00144637	0.00454671	-0.00232594	0.00156728	-0.00468852	0.00185979	-0.00133466	0.000561095	0.00101495	-0.000739673	-0.00162513	0.000192073	-0.000914692	-0.00176222	3.38e-05	-0.00187882	0.0010502	0.000425753	0.00180751	-8.24e-05	0.000456207	0.000715106	0.000991698	-0.000297439	0.000752947	-0.000286926	-0.00160705	-0.00100031
Kinixys_belliana	TER	0.0801187	0.0528122	-0.000459856	0.0193238	0.0137769	-0.00624835	-0.00117206	0.00214447	-0.0010172	-0.00196222	-0.00068754	0.00640234	0.00155474	0.00184622	-0.0048943	0.000409243	0.00544193	0.00384923	-0.00204926	0.00212154	0.00118457	0.000633813	0.00207237	0.00237128	0.00463137	-8.76e-05	0.000599154	-0.000526115	0.00190094	-0.00031869	0.000702915	-0.000798461	-0.00175935	-0.00116963	0.000126198	-0.00307489	-0.000854589	0.000221948	-0.000204299	0.000276558	0.000725232	0.00106552	-0.00126063	0.00105089	-0.000126099	0.000900167	0.000279918	0.000139099
Rafetus_euphraticus	FUA	-0.136522	0.108797	-0.00593877	-0.00812962	0.0198166	0.00760397	-0.0127988	0.00539146	-0.00584376	-0.011848	0.00312792	0.00166807	0.0094989	0.00457775	-0.0058398	-0.00670702	-0.00420209	-0.00313376	0.00517124	-0.000380206	0.00202912	0.00440122	0.00216327	0.00251031	0.00456803	-0.00513622	0.00184099	0.000935115	0.00270796	0.00128779	0.00118411	-0.000916072	0.000234959	-0.000182195	-0.000451788	0.00144005	-0.000651154	0.000601545	-0.000282153	-0.000795364	-0.000748919	0.000925203	0.00173156	0.000498094	-0.001077	0.000361342	-0.000506947	0.000397654
Platysternon_megacephalum	SET	-0.127026	-0.0266838	-0.00648229	-0.0348143	-0.0302267	-0.0111822	0.007895	0.00543779	0.00122116	-0.00255368	2.82e-05	0.000193318	0.00148776	0.000458161	0.00136141	0.00941918	0.0033793	-0.00623733	0.000768207	0.000263852	-0.00138971	-0.000619115	-0.00176073	-0.000841111	0.000817733	-0.00199073	0.00295042	0.00137086	-0.00241324	0.000732361	0.0032902	-0.000960389	0.000715987	-0.00131324	0.000231998	-0.000947472	-6.35e-05	-0.00101556	0.000293696	-0.00135362	0.000716827	3.74e-05	4.18e-05	-0.00126744	-0.000331049	0.000103541	0.000562252	-0.000848005
Pelodiscus_sinensis	FUA	-0.139652	0.0128042	0.0299147	0.019567	0.0249092	0.0455942	-0.0283588	-0.0113848	-0.0116936	-0.00289252	0.00303563	-0.00144487	-0.0169879	0.0028265	0.00402259	-0.00249205	0.00943395	-0.00493266	0.00331928	0.0015267	-0.00356176	0.000689874	-0.000620608	0.00227983	-0.00215485	0.000978432	0.00174653	0.00315598	-0.00190833	-0.000400774	0.00122534	0.0011891	-0.00125637	0.00197448	-0.00199262	-0.000509418	0.000448248	-0.000548094	-0.000233403	-0.000112092	0.00233345	-0.000195787	0.000801322	0.00120742	0.000550386	2.04e-05	-0.000247269	0.000210749
Stigmochelys_pardalis	TER	0.187367	0.0180996	-0.0144205	0.0131698	-0.001104	0.013758	0.00585259	-0.00627807	0.00965412	0.0117927	0.00212308	0.00105601	0.00740228	-0.0085047	0.00580285	0.00577494	0.00710664	-0.00414409	-0.00149262	-0.00526802	-0.00143227	-0.00113921	0.00161135	0.00317585	0.00396753	-0.000396531	-0.00241345	0.00343187	0.00166957	0.000430918	0.00171595	-0.000492782	0.00184499	-0.000214273	-0.00266413	-0.000849528	-0.000413213	-7.76e-05	-0.00138854	0.000863941	-0.00163493	-0.000584252	0.000420893	-3.4e-05	-0.000333812	-0.00168077	0.000571249	-0.000285388
Dermochelys_coriacea	FME	0.0303505	0.262597	0.00934713	-0.00974594	-0.0225236	0.0268659	-0.0280405	-0.00859303	6.46e-05	0.00231306	0.00459614	0.00130204	-0.00234471	0.000334762	0.00333315	0.0160269	-0.0112287	0.00480515	-0.00369437	-0.00145674	0.00306208	-0.00389758	5.8e-05	-0.000841697	-0.000150859	-0.00019986	0.000901588	-0.00123871	-0.00256551	0.00122501	-0.000493705	0.00122006	-0.000561667	-0.00124774	0.000510778	-0.000124346	-0.00103069	0.000337749	-0.000204438	0.000496858	8.42e-05	-0.000308753	-0.00022095	0.000302062	0.000104636	-4.8e-05	0.000128204	0.000236704
Chelonoidis_carbonaria	TER	0.130665	-0.00572048	-0.00866692	0.0248735	0.0159701	-0.00586495	-0.00950514	0.00793537	0.00355498	0.00325745	0.00260121	0.00133204	-0.00206961	-0.00557843	-0.0015701	0.00100063	0.00226521	-0.00515173	-0.00224319	-0.00182103	-0.000479851	-0.000162672	-0.00199008	0.000313041	0.000296226	-0.00065345	0.00214819	-0.000613963	-0.000915309	-0.000537332	-0.000483894	0.00103706	-0.00155423	-0.001686	0.000139335	0.00118395	0.00195367	0.000689865	0.000787288	-0.00109373	-0.00100924	0.000514295	0.000310186	-0.000116252	-0.00137252	-0.0013813	-0.000295509	-0.000309607
Rhinoclemmys_annulata	SET	0.0431842	0.0187802	0.0164784	0.0233969	-0.0186968	-0.00736713	0.00781291	-0.00686437	0.00491822	0.00363887	-0.00841256	0.001313	0.00366495	0.00620923	-0.00278977	0.00114531	0.00082916	0.000912601	0.000737896	0.000168922	0.000597094	-0.000233938	0.00149595	-0.00254846	-0.000177052	0.00087535	-0.00193858	0.00348066	9.12e-05	0.00248158	0.0036302	0.00036673	0.000749488	-0.000348692	0.000157366	0.000906048	-0.000980529	-0.00156941	0.000307658	-0.000736817	-0.00113669	-0.000191813	0.000908208	0.000797085	0.00198593	-1.48e-05	-0.000835623	0.00086891
Emydura_macquarii	SEA	-0.0570991	0.0266125	-0.0189548	-0.0649145	0.0280001	-0.00484818	0.00669635	0.004134	-0.00139773	0.000896926	-0.00487855	-0.00049523	-0.00216118	-0.00696827	-0.00955143	-0.000912471	0.00110314	-3.72e-05	-0.00786049	-0.00714938	0.00152874	-0.000381106	0.000429403	0.0022749	-0.00229797	0.00174504	0.000517606	0.00371503	0.00112789	-0.00299759	-0.00175567	-0.000890075	0.00034086	0.000570264	0.00142017	-0.000269555	-0.00132419	-0.000923872	0.000326792	-0.00096712	-0.000675493	-0.000931415	8.35e-05	0.000125956	-4.33e-05	-0.000739546	-0.00105977	0.000907609
Astrochelys_radiata	TER	0.185367	0.00897184	-0.0431598	0.00559185	-0.00327854	0.0127951	-0.00977648	0.001485	-0.00399719	0.00866042	-0.00309044	0.00121467	-0.00203203	-0.012848	0.00777267	-0.00162126	0.00348773	0.00183697	-0.00256106	0.00516636	-0.00378238	0.000530032	-0.000681374	0.00393197	0.000816801	-0.0017247	0.00195239	-0.00165733	-0.00153858	0.000926031	-0.00022347	-0.00233264	0.00156298	0.000725155	0.000948393	-0.000110134	0.00165487	-0.00226751	-0.000293642	-0.000667671	-0.00118231	0.000544591	-0.000315191	-0.00199313	0.00104787	0.0022293	-0.000974159	0.00125296
Pyxis_arachnoides	TER	0.14856	0.0342091	-0.00582262	0.00345729	-0.00649365	-0.000451555	-0.00647628	0.0106824	0.00185086	0.00112389	-0.00173302	-0.00313838	0.00231747	-0.00756801	0.000922145	-0.00742019	0.000643971	-0.00136452	0.00346938	-0.000921539	-0.00228848	0.00294124	0.0019433	-0.000795208	-0.00260015	0.00181803	0.00212421	-0.00491311	-0.00271735	0.00193431	-0.000578859	0.000115923	0.000498062	-0.000445002	0.00026729	0.00092353	0.00136805	0.000576304	-0.00118695	0.00157944	-0.000191101	-0.000780566	-0.000824048	0.000773973	-0.00125926	-0.000898956	0.00102907	0.00039244
Phrynops_tuberosus	SEA	-0.0856238	-0.033699	0.0201865	-0.0247532	0.00931029	0.0201674	-0.00275664	0.00343007	0.0172984	-0.00658796	-0.00340008	0.00169514	-0.00961666	-0.00796596	4.01e-05	-0.0036505	-0.00450427	0.000555568	8.02e-05	-0.00131598	-0.00331875	-0.00302516	0.00454495	0.00244773	-0.000877478	-0.00156579	0.000698263	0.00209246	0.0026608	0.0013887	4.19e-05	0.0026293	0.0030669	-0.000807648	-0.000168954	-6.23e-05	-0.0011891	0.00284397	0.00128665	0.000143475	0.000319573	0.000238249	-0.000787751	-0.00165246	-0.00045348	0.00121409	-0.000586791	-0.000607335
Podocnemis_vogli	SEA	0.0165005	-0.0148857	0.00341051	-0.00882613	0.00597481	-0.0031599	-0.000629506	-0.0095505	-0.00417436	0.00830131	-0.00220207	0.00877622	-0.000745792	0.00538188	-0.00510772	0.00402019	0.00552692	0.00453593	0.000935813	-0.00526379	-0.00728247	0.000293501	0.00395383	0.000305279	-0.00167666	0.00157864	-0.000227129	-0.00105797	-0.000170349	-0.00127092	0.000727812	-0.00142897	-0.00321898	-0.000563077	0.000314108	0.000747457	-0.00128495	-0.000648146	0.000361061	0.000934115	-0.000987006	-0.000223135	-0.00102489	0.000456832	-0.000545587	0.000158351	-0.000705935	0.000839509
Lissemys_punctata	FUA	-0.0515872	0.0243846	0.065303	0.0167381	-0.0102634	-0.0185188	0.00770639	0.0116842	-0.0145035	0.00184308	-0.00166459	-0.000923087	0.000140677	-0.0021673	0.00193799	-0.00262995	0.00309712	-0.00476075	-0.00216265	-0.00168659	0.0049808	0.000689823	-0.00270435	0.00187117	-0.00115055	0.00390921	0.000141688	2.18e-05	0.000819003	0.00157611	0.00118912	0.00114972	-0.00327777	0.0012106	-0.000932107	0.000285505	-0.0021905	0.00026795	-0.000842408	-0.000389769	0.000216725	-0.000319273	0.000530149	-0.00209344	0.00110214	0.000264673	0.00157728	0.000405862
Chelodina_oblonga	FUA	-0.0467848	0.13107	-0.0152971	-0.0180664	0.0180249	-0.0137012	0.00151665	-0.0154968	-0.00757774	-0.0081559	-0.000910171	-0.0147337	0.0121952	-0.00625326	-0.00251805	0.00052727	0.0064514	0.00246834	0.0029663	0.00143127	0.000395547	-0.00649315	-0.00491305	0.000930726	-0.00117646	0.000476435	-0.00175718	0.000733787	0.00157165	-0.000785859	0.00010743	-0.00287045	0.000181397	0.00149881	-0.000106998	0.00180477	0.00143009	0.00167873	0.000781552	0.000396758	0.00129854	0.000295206	-0.000560319	7.53e-05	0.000469153	-4.39e-06	0.000296936	-0.000151373
Mesoclemmys_dahli	SEA	-0.0657745	0.0175534	0.0135223	-0.0225685	0.00954678	-0.00881655	0.00374763	0.0143852	0.00466985	-0.00988808	-0.00517399	-0.00170396	-0.00459891	-0.000765215	-0.0036379	-0.00207339	-0.00536527	-0.00266013	-0.00652983	0.00254007	-0.00147967	-0.000701461	0.00338605	0.00196053	0.00198373	0.00176128	-0.00138383	-0.000947504	0.000983406	0.0016514	-0.00213719	0.00260199	-0.00114015	0.00174705	-0.0020368	-0.000218182	0.00183302	-0.00154223	-0.00255652	0.000843044	-0.000335428	-0.00134962	2.82e-05	0.000720116	0.000939036	0.000335017	0.000395402	-0.00128438
Chersina_angulata	TER	0.149461	-0.00244551	-0.0145809	0.00523469	0.00674918	-0.00144583	-0.00944132	0.00271193	0.00228037	-0.00171711	0.0034284	0.00407619	0.0010225	-0.00381767	0.000870699	-0.00282645	0.00222511	0.00187991	0.00153772	-0.000743846	0.000556563	0.00138607	0.000677061	-0.00173232	0.00270773	-0.00131032	0.00122273	0.000858745	0.000111501	-0.0010057	0.000612178	0.00237072	-0.00177847	-0.00247493	0.000237865	0.00180911	1.34e-05	0.001977	-0.000714752	-0.00034526	-0.00045134	-0.00148026	0.000443441	-0.000639819	0.00104921	-0.000802919	0.000272066	-0.000247947
Gopherus_polyphemus	TER	0.055761	0.0417873	-0.0148156	0.0186896	0.00547639	-0.00130202	-0.00101566	0.00351616	-0.000233057	0.0018011	-0.00140463	0.000466256	-0.00288855	-0.0010413	0.0023066	0.000796277	0.00457013	0.00291953	0.000338431	0.000342361	-0.000398022	0.000821416	0.00277003	0.000304257	0.000772826	7.34e-05	-0.00118358	0.00015608	0.00063927	0.000518862	-0.00077065	-0.000252816	-0.00119114	0.000145175	0.000599167	0.000160984	-0.000690942	-0.00114463	0.000498564	-0.000255131	-0.000382963	-0.00128175	-0.000413904	0.000156616	0.000915368	3.7e-05	0.0005215	-0.00110256
Sternotherus_odoratus	SEA	0.049391	-0.0100367	0.0229102	0.012827	0.018177	-0.00997741	-0.00622406	-0.00140398	-0.0112522	-0.00136329	0.00401349	-0.000177216	0.00696131	0.00141739	-0.000788583	-0.0022859	0.00519922	0.00181851	-0.000478235	-0.00381893	0.000845847	0.00149403	0.00231156	-0.00326278	-0.00393689	-0.00269568	0.00251341	0.00026112	-0.00173667	0.00321136	-0.00179087	-0.000121484	0.00232986	0.00094418	0.00254989	-0.000443068	0.00034412	0.00130215	-0.00139794	0.000274389	0.000473597	-0.0015754	0.000288143	-0.000847752	0.00076863	-0.000484585	6.04e-06	0.00118013
Graptemys_geographica	SEA	-0.071388	-0.0291229	0.031406	-0.0238562	-0.0148222	-0.00942634	0.00670818	-0.00114176	-0.00580254	0.00783029	0.00468252	0.00394532	-0.000227564	-0.0049196	-0.000336114	0.00117778	-0.000969104	-0.000414005	-0.000548673	0.00729758	-0.0019627	-3.13e-05	0.00165674	0.00326852	-0.000326809	-0.00176864	0.00267067	0.000611279	-0.000702275	-0.000682391	-0.000968661	-0.000680197	-0.00130837	-0.00151663	0.00208675	-0.0008913	0.000153121	6.72e-05	-1.85e-05	6.81e-05	0.00127878	0.000661788	0.000334529	0.00107517	-0.000516044	-0.00164304	0.000871212	-0.000399671
Clemmys_guttata	SET	-0.0155908	0.00503077	-0.01921	0.0174418	0.00589421	-0.00514188	0.0053854	-0.00802843	-0.00986352	-0.00576388	0.000397745	0.00985368	-0.00864946	-0.00189078	0.00277855	-0.00264251	-0.00388945	0.00545914	-0.00170293	0.00552701	0.0018074	0.00137323	-0.000835675	-0.00503158	0.00114258	-0.00158791	-0.000679905	0.00181006	0.00109945	-0.000553832	-0.000553102	4.84e-05	0.000508384	-0.00202452	0.00178817	-2.43e-05	0.000951343	-0.000102461	-0.000244341	0.000573991	0.00046966	-0.000237861	0.00112664	6.61e-05	-0.000118011	-0.000408556	-0.000141187	-8.23e-05
Deirochelys_reticularia	SEA	0.17195	0.0265663	0.000462272	-0.0203754	-0.00764116	-0.0110826	3.93e-05	0.000230968	0.00970065	-0.0075717	-0.00241207	-0.00187849	-0.001397	0.00481226	-0.00442739	-0.00551857	0.00455808	0.00474316	-0.000492666	0.00558142	-0.000329023	-0.00309684	0.00312263	-0.000568822	0.00152528	0.00307429	0.000391832	-0.00176962	0.00179677	-0.000140905	0.00224561	0.000578461	0.000838219	0.00136689	0.000604467	-0.00109251	0.00120466	0.000358323	0.00192179	0.00180342	0.000666659	-0.000611354	-0.00032093	0.000583712	0.000256444	5.24e-05	5.19e-05	0.00108953
Malaclemys_terrapin	SEA	-0.0257583	-0.00943493	0.0264117	-0.0190227	-0.004473	0.00773036	0.0189439	2.32e-06	0.00419095	-0.00277882	0.0117843	-0.00144731	0.0019368	0.00755743	0.0135911	0.00214328	-0.00234217	0.00063769	0.00129535	-0.00572082	-0.00223442	0.00647724	-0.00533858	0.0039674	0.00471095	0.00330237	0.00180536	-0.00217043	0.00296144	0.0018285	-0.00338858	0.000375475	0.00107888	0.000397083	-0.000456784	0.000422111	0.000961361	0.000355768	0.00140511	0.000482483	0.000443702	0.000789701	-0.000919836	0.000586244	0.00128984	-0.00112331	-0.000727888	0.000677427
Kinosternon_baurii	SEA	0.12665	-0.0151709	-0.0329043	0.0146324	0.0093292	-0.00430512	0.000410512	-0.0026539	-0.00340322	-0.0100422	-0.00410176	0.00976987	-0.00611413	-0.00275492	0.00202703	0.00174295	0.00124551	-0.000437747	-0.00376492	-0.00585697	0.00021301	-0.000190928	-0.00176953	-0.00269083	0.00119477	0.00352481	-0.000832736	0.0014271	0.000773965	0.00156545	-0.000720337	0.000442019	-0.00117449	-0.00124195	-0.000280237	0.000206525	0.000657072	-0.000547	0.00159687	0.00182569	0.000893832	-0.000502574	0.000595422	-0.000394342	-0.00114899	0.000975735	0.000659283	-0.000628506
Emydoidea_blandingii	SET	0.076841	-0.0731324	0.002426	-0.000558152	-0.00401547	-0.00569088	-0.0123821	-0.00437576	0.00176447	0.00764621	0.00555502	0.00327501	0.00553096	0.00307816	0.000744878	0.00609809	-0.00340952	-0.00739601	-0.0012323	0.00208166	0.0011683	-0.00490214	-0.00267883	-0.0015234	0.00218296	-0.00109655	-0.0016483	5.92e-05	0.000300467	-0.000807133	-0.00336961	0.00073287	0.00132438	0.00222356	-0.00120817	0.000294044	0.000260335	0.000818727	-4.11e-05	7.85e-05	0.000689091	-0.00189506	0.00134558	0.000630434	-0.00035217	0.00150706	-0.00044347	0.00104476
Eretmochelys_imbricata	FME	-0.191804	-0.0664536	0.0273715	-0.0128637	-0.0394331	0.0260015	-0.0200648	-0.00516436	0.0247387	-0.00748649	3.49e-05	0.00015768	0.00444189	-0.00920043	-0.00401388	-0.00198892	0.00802414	0.00759473	-0.00141693	-0.00113595	0.00179939	0.00122192	-0.00574387	-0.00314765	-0.00412676	-0.00364643	0.000933405	-0.00191894	0.00387425	0.00212965	-0.000305337	-4.26e-05	-0.00246844	7.22e-05	-0.000707721	-0.00230318	0.000261952	-0.000151823	0.000154491	-0.000129815	-0.00120665	-0.000537266	0.000608822	0.000464385	-6.79e-05	0.00010005	0.000287846	0.000162136
Geochelone_elegans	TER	0.148664	0.00310608	0.0178048	0.0145734	0.00375717	-0.0109445	-0.00650381	-0.00517675	0.00165174	-0.00441982	0.00676773	0.00587846	0.00159804	-0.00236986	-0.00464866	-0.00222037	0.000326396	-0.00202761	-0.00175686	0.00102199	0.00142427	0.000254288	-0.00220771	-0.00265437	0.000602378	-0.00088531	-0.00100851	-0.000454674	-0.00151645	-0.000633015	0.00127297	0.00143961	0.000514895	0.00248108	0.00011824	-0.000753056	-0.00053221	0.000642687	-0.00161329	-0.000940526	0.000356636	0.00102908	-0.0016199	-0.00115044	0.000580006	-0.000567785	-0.00148521	-0.000986393
Chelonia_mydas	FME	-0.152894	-0.0584023	0.047453	0.0130482	0.0327426	0.00503674	0.00478044	0.00606476	-0.0160501	-0.00831562	-0.000244645	0.00269549	0.00848117	-0.00494636	0.00604724	0.00369765	-0.00383542	0.00770732	-0.00123748	-0.00267901	-0.000623953	-0.000177077	-0.000195883	-0.00356667	0.00170937	0.00120937	0.00068384	-0.0017482	-0.00389667	-0.00355769	0.00290979	0.00334451	0.000847532	0.00258313	-0.000781939	-0.00185532	0.000181483	0.000314118	0.00219295	-0.000298296	-0.00205991	0.000354972	-0.000494251	0.000320321	-0.000721593	0.000395809	0.000373165	0.000406749
Actinemys_marmorata	SEA	-0.0968806	0.00507186	-0.00548721	0.0218526	-0.0118202	-0.000707376	0.0113461	-0.00625659	0.0118014	0.000859962	0.00522896	0.00149983	-0.0102584	0.0052452	-0.000975606	0.000908099	-0.00237311	-0.00187299	-0.00217207	-0.0011661	0.000152362	0.0041903	-0.000235141	-0.00398041	0.00317905	-0.00209344	0.000901367	-0.0016178	0.00110436	-0.00201301	-0.000222573	-0.00070072	0.000384193	0.00155398	0.00219607	-0.000735234	-0.000756041	0.00028953	-0.00233797	0.00075953	-0.000400055	0.00106865	-0.000111258	-2.38e-05	0.000935693	5.91e-05	-9.53e-05	0.000733324
Terrapene_carolina	TER	0.131836	-0.0622241	-0.015784	0.00555629	0.0032392	-0.0173568	-0.0188676	0.00349764	0.00147916	-0.0136747	0.00487312	-0.000851253	-0.0033693	-0.00119814	-0.00460387	0.0102383	0.00172082	-0.00908421	-0.00159931	-0.00112217	-0.00107369	-0.00197247	-0.0022557	-0.00157362	0.000291776	0.00216389	0.00363373	-0.00177488	0.00224158	-0.000629635	0.000757569	-0.000260155	-0.00150009	-9.7e-05	0.000677483	0.000904667	0.00103008	-0.000277267	-4.44e-05	-0.000995442	-0.00015396	0.00208885	4.34e-05	0.000290588	-5.01e-05	0.000471299	-0.000829854	-4.2e-05
Testudo_graeca	TER	0.0733476	-0.00337597	-0.00159369	0.0324252	0.0103614	0.00288843	0.00347339	-0.00144587	0.00269853	-0.0016555	-0.00384438	0.00140271	-0.00314879	-0.000789322	0.00703377	0.0033524	-2.67e-05	0.00202597	-0.00318922	-0.00223997	-0.00100828	0.00319541	0.000782899	0.000520536	-0.00424787	-0.00223041	-0.00122271	0.00298574	0.00171824	0.000183153	0.000760296	-0.00164461	0.00310773	0.00251548	0.00107515	-9.49e-05	-0.000294561	-0.000301062	-0.000948186	0.000436136	0.00111291	0.00215872	-5.51e-05	0.000705324	-0.00111033	-0.000729798	0.00154939	4.83e-05
Hydromedusa_tectifera	FUA	-0.118457	-0.0110277	-0.00740707	0.0118093	0.0141487	-0.0206972	0.00283379	0.00365733	0.00210028	-0.00606816	0.00354267	-0.00970242	7.17e-05	0.000479624	0.00312207	0.00457842	0.00301846	-0.00233309	-0.000164067	-0.000131322	-0.0028508	-0.00191376	0.00360451	0.000154053	-0.00196003	-0.00206267	-0.0011211	-0.00287944	0.000293277	0.00390294	-0.00237171	0.00250288	-0.000439293	-0.000110825	0.00222446	0.000525913	-0.00326145	-0.00166293	0.00200004	-0.000289151	0.000306482	0.00120454	0.00100015	-0.000205688	-9.45e-05	-0.0003112	0.000327715	0.000117932
Orlitia_borneensis	SEA	0.0811045	-0.0352668	-0.0241147	-0.0291791	-0.00673741	-0.00368418	0.000227458	0.00148209	-0.00360058	0.00395643	-0.00401969	0.00211415	0.00363755	0.00296087	0.00494021	0.000452752	-0.000196211	-0.003479	-0.00056366	0.00276576	0.00106409	-0.00160746	-0.00147036	0.000842767	-0.00712481	0.00196813	-0.00132777	-0.00132714	-0.00152094	-0.00101552	-0.000708011	3.85e-05	0.000854795	-0.000761856	-0.00111021	-0.00115895	-0.00109985	0.00157943	-0.00146916	0.00115195	-0.00157156	0.00199373	0.00121862	0.00143409	0.000263427	0.000507873	-3.51e-05	-0.000526718
Cuora_amboinensis	SEA	0.144993	-0.0637987	-0.00812089	-0.0147549	0.00813107	-0.00659637	-0.0153219	-0.000416324	-0.00249811	-0.00322522	0.00258156	0.00671457	-0.00367723	0.00134973	-0.000470858	0.00326536	-0.00330388	0.0014369	0.00104593	0.00273774	5.02e-05	0.00173024	-0.000749798	-0.00071045	-0.00128972	0.000535479	-0.00111015	-0.000356599	0.00121906	-0.00119755	0.000389375	-0.00222207	0.000607596	-0.00150484	-0.00221508	0.000831238	-0.00128794	0.00101872	0.000671943	-0.00023623	0.00100429	-0.00058766	9.92e-05	-0.000272057	-0.000265975	-0.000159633	0.000250349	0.000343256
Notochelys_platynota	SEA	-0.0197506	-0.0664835	-0.0564485	-0.00999831	-0.0271723	-0.0133698	-0.0137106	-0.0101872	-0.012641	-0.021483	-0.00498992	0.0049214	0.000812308	0.003719	-0.000680789	-0.000865772	0.000371468	0.00808661	0.00212824	0.000145099	0.000346697	0.000171827	-0.00208995	0.00653496	0.00386827	0.00227364	-0.00237566	0.00110736	-0.00346128	0.00236838	-0.00191085	-0.000608585	9.91e-05	0.00120075	0.000747695	-0.00288556	-0.000813331	0.000505245	-0.00108021	-0.000556249	-0.000112713	-0.00025408	0.000768224	-0.00114822	-0.000936922	-0.000940617	-0.000338989	-0.00044543
Cyclemys_dentata	SEA	-0.0449843	-0.0329096	0.0251448	-0.0198261	-0.0157311	0.0166831	0.0089814	-0.00371197	0.00306962	0.00526248	-0.012861	-0.00729189	0.0021236	0.000569623	-0.0030773	0.00235732	-0.00130975	0.00102625	-0.00470463	0.000586791	-0.000380685	0.00173686	0.000404362	-0.00471748	0.00290574	0.00106222	0.000427421	0.00330863	-0.00182125	0.00203665	0.000328312	-0.0013424	-0.000267617	0.00245162	0.00173561	0.00164823	0.00223924	0.000227307	0.00026328	-0.000883868	0.000405958	0.000150663	-0.00113544	0.000858923	-0.000534163	-0.000291121	-1.5e-05	-0.00162641
Batagur_dhongoka	FUA	0.0768117	-0.0734285	-0.0297486	-0.0642308	0.00886561	0.0263267	-3.99e-05	0.00614204	-0.00693557	0.0141179	-0.00986375	-0.0101842	-0.00530515	-0.00337692	0.00356322	0.00129193	0.00128725	0.0037258	0.00272255	-0.000150252	0.00286909	0.00147776	-0.00131706	0.000257539	0.00259128	-0.00230582	-0.00692293	-0.00339068	-0.000135746	-0.000511783	0.00236714	0.00324094	-0.00176817	-0.000377472	0.00174334	0.00166874	-0.00058434	3.6e-05	-0.000965114	-0.000123126	0.00124315	0.000832877	0.00035881	-0.000215245	-2.23e-05	-0.000427428	-0.000539185	0.000354227
Vijayachelys_silvatica	TER	-0.00337715	-0.0100439	-0.00850533	0.0218445	0.0043542	-0.000540388	0.0239991	-0.0010833	0.00161857	-0.00658078	0.00286709	-0.0119043	-0.000491838	-0.00678203	-0.00377783	0.00689899	-0.0019767	-0.000372603	0.00534869	-0.0013043	-0.000768311	0.00189225	0.00287135	-0.00504292	-8.01e-05	-0.00106912	-0.00373845	0.000289971	0.000566477	-0.00273552	-0.0023478	-0.00197341	-0.0018611	-0.00111886	-0.00222245	-0.00246786	-4.31e-05	0.000370856	-0.00111414	0.000675093	0.0019209	0.000431944	-0.000767711	-0.00124563	5.2e-05	0.000367222	-0.00017199	0.000619338
Melanochelys_trijuga	SEA	0.106105	-0.019589	-8.78e-05	-0.0180448	-0.00025371	0.000990796	0.00359418	-0.00982389	0.0123509	0.00905476	0.00110114	0.0102535	-0.000437224	0.00996473	-0.00941487	2.13e-05	-0.00219675	0.000736003	3.42e-05	-0.0024799	-0.00387932	0.00206509	-0.00243751	0.000924068	-0.00120687	0.00235497	-0.00229064	-0.00154997	-0.000736424	0.00158265	0.000528315	-0.00027012	0.00116187	0.00147377	0.00104774	0.00156356	-0.000496489	0.00102927	0.00030234	-0.00100126	0.00102533	-9.31e-05	0.000782153	-0.000360816	-0.000264152	0.00151343	0.00176944	-0.00014692
Caretta_caretta	FME	-0.0356652	0.0466764	0.0515302	-0.0175489	-0.0403629	0.00205616	-0.0100503	0.0107005	-0.00630166	-0.00833946	0.00164557	-0.00589142	-0.00712928	0.00195155	0.00111657	-0.00495305	0.00955638	-0.00304113	0.000107654	-0.000143362	0.00263466	0.00194633	0.00121248	-0.00195892	0.000517349	0.00231079	-0.00227402	0.0019211	-0.00277358	-0.00157945	-0.00320028	-0.0015018	0.00237418	-0.00222585	-0.000307141	0.00146886	-0.00154462	0.000722438	0.000417876	0.000719365	-0.00178392	0.00123802	-0.00158054	0.000184945	-7.24e-05	0.000988943	-0.00043029	-0.00047781
Dogania_subplana	FUA	-0.303686	0.0282184	0.020759	0.00518515	0.0143007	-0.00961978	-0.00835924	-0.0151122	0.0116506	0.00790155	0.00726514	0.00538465	-0.000575906	-0.00213561	-0.00442716	0.00282732	0.00653119	-0.00371961	0.00246248	0.00585023	0.00123945	0.00503455	-0.00175892	-3.32e-05	0.00104889	0.00465507	-0.00359531	-0.00073998	-0.000502755	-0.00165505	0.000106549	0.00223923	0.00209044	-0.00101004	0.000743928	0.000917622	0.000602986	6.58e-05	-0.000980523	-0.000615801	-0.000818919	-0.00101136	-0.000655573	-0.00051201	-0.00132664	-0.000367754	0.00019323	0.000862847
Heosemys_spinosa	SEA	-0.0196507	-0.014012	0.0307432	0.0214566	-0.0038362	0.00318331	0.0179854	-0.00173515	0.00315477	-0.0058857	-0.00786149	0.00419414	-0.00458064	-0.00291279	-0.00457191	-0.00222604	-0.00813084	0.00148712	0.00100882	0.00114764	-0.00190016	-0.00249177	-0.00228499	0.00193184	-0.000463199	0.000561631	0.00143943	0.000941437	-0.00139675	0.000411656	0.0025746	-0.000544517	-0.000253456	-0.00127231	-0.000867405	0.00173476	0.000349321	0.00167024	8.7e-05	0.00143812	-0.000660258	0.0012888	0.000389824	-0.00146872	0.00124509	-0.00055886	0.000493636	0.00053026
Chelus_fimbriata	SEA	-0.0701982	-0.0171451	-0.0509112	-0.0206809	0.0120101	-0.00996717	0.0167705	0.00845122	-0.00396527	0.00852011	0.0414811	-0.0100038	-0.0061804	0.00668491	-0.00250266	-0.000220214	-0.000257151	0.00702864	-0.00358274	0.00226957	0.000602139	-0.000806953	-0.000445032	-0.000134122	-0.00246069	0.000571019	0.000300679	0.00197376	-0.000465613	0.00387553	0.00328417	-1.86e-05	-9.53e-05	-0.000559129	-0.00174621	-0.000185278	0.000802958	-2.97e-05	-0.000625405	0.000566858	-0.000944521	-7.83e-05	-0.000352668	-0.000127714	-0.000686522	0.000349879	-0.000454476	-0.000172965
Macrochelys_temminckii	SEA	-0.00736692	-0.0764891	-0.00530951	0.0342775	-0.0262024	-0.0241695	-0.0282884	-0.0307811	-0.00532704	0.00254626	0.00257166	-0.0169897	-0.00200057	0.00169989	0.000194937	-0.0036046	-0.00868574	-0.0017133	-0.00397319	-0.00496177	0.00497564	0.00470201	0.00330404	0.00602963	-0.00227023	-0.00191457	-0.00108537	-0.000633117	0.000978583	-0.00279759	0.00180604	0.000472981	-0.000227021	-0.000912758	0.000432514	0.000168454	0.00150343	-0.000284242	0.00132539	6.95e-05	-0.000214043	-0.000759855	-0.0009997	-2.13e-05	0.000246634	0.00052744	0.00039945	-0.000388114
Malacochersus_tornieri	TER	-0.189365	0.0121857	-0.13158	0.0519364	-0.0442664	0.0363752	0.00333391	0.0175796	-0.00854009	1.14e-05	0.00572148	-0.00013078	0.00774931	-0.00180237	-0.00743026	-0.00372193	-0.00158622	-0.00429372	-0.00362513	0.00113371	-0.00495128	-0.000329764	0.000279814	-0.000398047	-0.000788996	0.0023719	-0.000441141	-0.000596776	0.00058629	-0.00280442	4.77e-05	0.00135984	0.000445988	0.00148496	0.000626273	0.000717257	-0.00126402	0.000918424	0.00117539	0.000118311	0.000721013	-0.000385976	-0.000145372	7.92e-05	0.000708714	-0.000842675	3.31e-05	2.16e-05
Malayemys_subtrijuga	SEA	0.00367418	-0.0109827	0.0203015	-0.0146502	-0.0168106	0.00173	0.0116937	0.00863232	-0.00535415	-0.00567832	-0.0100443	-0.0136874	-0.00253714	-0.00100911	0.00225267	0.00540146	-0.00444875	-0.000309542	5.42e-05	-8.72e-05	-0.00168396	0.0028294	0.00417534	-0.000589051	-0.00132993	0.00494781	0.00236358	0.00017502	0.000911583	-0.000400696	0.00119301	-0.00129301	0.00044352	-0.00114165	0.000151961	-0.00129503	0.00153632	0.00152092	-0.00117572	-0.00172321	0.000168087	-0.00116983	0.00223472	0.000368776	-0.000346367	6.18e-05	-0.000645091	0.00135219
Indotestudo_elongata	TER	0.123842	-0.0239347	0.00520849	0.0408274	0.0124399	0.00200331	0.0126092	0.00945996	0.0107638	-0.0102769	-0.0051446	-0.0109777	0.00860631	0.00182576	0.00548195	0.00571642	0.00264929	0.00440132	0.000329717	0.00505092	0.00113578	0.00187479	-0.00336987	0.00280354	-0.00182968	0.00025476	0.000898103	0.00270251	0.000359031	0.000432935	0.000322746	0.00296735	8.84e-05	-0.00168626	0.00138208	0.00139617	-0.000931187	2.12e-07	-0.000356682	-7.64e-05	0.00103617	-0.000993682	-0.00104129	0.000515067	-0.000240153	0.000999049	-0.000600175	-0.000357858
Pangshura_tentoria	SEA	0.104231	-0.00879668	0.0219479	-0.00236533	-0.0122408	0.0060155	0.0139933	-0.0103097	0.00760613	0.0109081	0.000146128	-0.00369784	0.00720319	0.00171984	-0.00641506	-0.00391576	-0.00344536	-0.00448726	0.00413601	-0.00155284	-0.00190255	0.00147267	-0.000482001	0.00144349	0.000692102	-0.00157194	0.00333423	0.0030003	-0.00454367	0.000932995	-0.00119564	0.00124014	-0.00329559	0.000983825	0.000298141	-0.000643839	-0.000865368	-5.86e-05	0.000164456	0.0021833	0.000744034	-5e-05	-0.00023498	-0.000427378	-0.00118264	0.000742339	-0.0012366	0.000222588
Morenia_petersi	SEA	0.155704	0.0200973	-0.0109711	-0.00207032	-0.0182531	-0.00585489	0.0057715	-0.00923978	0.0130613	-0.00119176	-0.000257719	-0.00399813	0.00121711	0.00267523	0.000842173	-0.0019063	0.00408396	-0.00250746	0.00336499	0.00286501	0.00324195	-0.00129725	0.00501845	-0.000547428	0.0012937	0.000601722	-0.000713888	0.000647779	-0.000961	-0.000894827	0.000252724	0.00296536	0.000174068	0.00117929	-0.00108429	-0.00118214	0.00101535	-0.000399009	0.00173916	-3.77e-05	-0.000860512	0.00184265	0.00185154	0.000272774	-0.000109067	-0.000529356	0.000210667	0.000282031
Geoemyda_spengleri	TER	-0.0437846	0.0587919	0.0164053	0.0180171	0.00544451	-0.00514522	0.0150483	0.00970408	0.00865308	-0.00335859	0.000162681	-0.00299808	-0.012421	-0.00423868	-0.00627214	0.00447554	-0.00401979	0.000157468	0.00969173	-0.000334489	-0.00110831	0.000139235	-0.00490995	0.00343718	-0.00100103	-0.000821947	-0.00131942	-0.00155685	-0.000983116	-0.00219519	0.000619456	-0.00241522	0.00103244	0.0011938	0.00141251	-0.000203562	0.00040019	-0.001943	0.00115888	0.00123474	-0.00165623	-0.00158864	0.00122153	-0.000161175	6.41e-05	-0.000317518	-3.23e-05	-0.000889253
Manouria_impressa	TER	0.00285109	0.0447375	0.0121119	0.0227344	-0.000404317	-0.00721253	0.00293208	0.00823155	-0.000294154	0.00250953	-0.0109515	0.00210285	0.00378058	0.000771425	0.000177186	0.000829952	-0.00576639	-0.00162554	0.00114774	0.00294736	-0.00236038	0.00222062	-0.00034325	0.00225006	-0.00237451	-0.00111095	-0.000883447	-0.00247052	0.00188591	0.000968251	0.00164037	-0.000156839	0.00057498	0.000797754	-0.00202106	-0.000844113	-0.00155665	-0.000272362	-0.00117583	-0.00152939	5.55e-06	-0.000878835	-0.00162846	0.000794819	-0.00149434	0.000467469	-0.000729519	-0.000348732
Platemys_platycephala	SET	-0.148688	0.0249949	-0.0074562	0.00868904	0.0125648	0.018682	0.0157143	-0.00551505	-0.00425677	-0.00615105	-0.01371	-0.000676185	-0.000359914	0.0198529	0.00426515	-0.00193286	0.00394021	-0.00755709	-0.0053615	-0.000658174	-0.00307969	-0.00483711	-0.000856825	3.28e-05	-0.000517237	-0.00453532	-0.00346456	-0.00241437	-0.000464921	0.00143857	0.000427635	-0.00107575	-0.0009851	-0.00253035	-6.39e-05	-0.0010328	0.00251183	0.000845254	0.000164907	-0.000140337	-0.0011744	-0.000548187	-0.000866022	-0.00123582	-0.000530774	-0.000357111	0.000104378	0.00053246
Trachemys_scripta	SEA	0.0353417	0.0202059	-0.0551583	-0.0218902	0.0195509	-0.00402756	0.00699648	-0.00243614	0.00385066	0.000644628	-0.00730227	0.00348075	-0.00522949	-7.93e-05	-0.0074229	-0.00290991	-0.00204541	-0.00509506	0.00545246	-0.00430044	0.00600746	-0.00232946	-0.00220664	-3.2e-05	-0.0018177	-0.00029716	0.0023433	-0.000866858	-0.00176799	0.00149339	0.000276933	0.00233824	0.00235903	-0.00142182	-0.000480284	-0.00265223	0.00050659	-0.000803256	0.000154923	-0.00128873	0.00100889	0.000249294	-0.00202633	0.00111475	0.00148495	-0.000706787	0.000523454	0.000359837
Glyptemys_insculpta	SET	-0.0173099	-0.000170702	-0.0319767	0.0004257	-0.0278163	0.0101922	0.0319067	0.00250709	-0.00593531	-0.0047509	-0.00528074	0.0101541	-0.00129788	0.00149836	-0.00037845	-0.000700747	0.00412205	0.00516799	-0.000274159	-0.00196109	0.00819184	0.00178867	3.82e-05	0.000644538	-0.000883523	-0.00207297	0.00287954	-0.000617485	-0.000740931	-0.00129077	-0.000764643	0.000464681	0.000577626	-0.000470646	-0.0029322	0.00301433	0.000570052	-0.00203014	3.6e-05	-0.000661147	0.00113661	-5.77e-05	-0.000140845	0.000404334	-0.00114562	0.000837697	0.000247803	0.000816974
Chrysemys_picta	SEA	-0.0326613	0.00625902	-0.000778261	0.00759016	0.0056204	-0.00612057	0.0106348	-0.00793167	-0.00258286	0.0039371	0.00129818	-0.000977193	-0.000260791	-0.000555467	0.00163855	0.000215631	0.000594745	-0.00281275	0.000251848	0.00273328	0.00154863	-0.000874762	0.00159589	-0.00283588	-0.000371893	-0.0023683	0.000313995	-0.000148421	-0.000272483	0.000182979	-0.00306996	0.0011964	0.00170825	-1.3e-06	-0.000753773	-0.000152337	-0.000119945	-0.00129206	0.00130776	0.000141351	-2.95e-05	-0.00122636	0.000610711	-0.000889458	-0.000401052	-0.000262249	-0.000284853	-0.000521043
Proganochelys_quenstedti	UKN	-0.159158	0.0344094	-0.0543376	-0.0135635	-0.00623857	-0.0242359	-0.0156783	0.00279335	0.0126049	0.00223853	-0.00279564	0.00769108	0.00194669	0.00320291	0.0162442	-0.00503247	-0.00672133	0.0015162	0.00874193	-0.000880841	-0.00165654	-0.00322178	0.00131191	-0.00275379	-0.00306812	0.00295796	-0.000249069	0.00449683	0.00184326	-0.000792828	-0.000864062	0.000692777	-0.00292194	0.00119074	0.000675046	0.000697058	0.00130797	-0.000919475	-0.000898721	-0.000975931	-0.000643564	0.000464091	-0.00126641	-0.000725405	-0.000366114	-1.03e-06	6.04e-05	0.00048942
Proterochersis_robusta	UKN	0.0951682	-0.0807684	0.0134256	-0.0117364	0.034838	0.0581312	-0.00775164	-0.00204416	0.0101377	-0.010273	0.00931995	-0.00153966	0.012334	0.00747041	-0.000777225	-0.00115733	-0.00486115	-0.00178458	0.00117896	0.00262081	0.00590059	-0.000769834	0.00365063	-0.000172965	-0.000986319	0.00445785	0.00109779	-0.0010373	-0.0002214	-0.00148914	-0.000436055	-0.00318489	-0.000267716	-0.000703915	0.00113575	0.000108847	-0.000587479	-0.00244191	-0.000505753	-9.03e-05	-0.000381177	0.000122953	-8.95e-05	-0.00153651	0.000237532	-0.000315836	0.000899589	-0.000642648
Plesiochelys_bigleri	UKN	-0.2054	-0.0312485	-0.0132488	0.00715748	0.0147002	-0.0208582	0.00733615	-0.0156326	0.0237924	-0.00165052	-0.00158857	-0.000882526	0.000330936	-0.00206462	0.0104117	-0.00603811	0.00164563	0.00325391	-0.00515695	-0.000952504	-0.000519697	-0.00475152	0.00116539	0.000582855	0.00207023	0.000346421	0.00292322	-0.00365293	-0.00403923	-0.00235925	0.00101449	-0.00273512	6.3e-05	-0.000708478	-0.00143368	0.00163799	-0.00231721	0.00035871	-0.00100949	-0.000319453	0.0014579	-0.000630041	0.000863274	0.000903607	0.000539443	-0.000377318	-0.000858036	-0.000590965
[truncated: 24 more columns]

## Sheet: pca_SET4
species	ecology	Comp1	Comp2	Comp3	Comp4	Comp5	Comp6	Comp7	Comp8	Comp9	Comp10	Comp11	Comp12	Comp13	Comp14	Comp15	Comp16	Comp17	Comp18	Comp19	Comp20	Comp21	Comp22	Comp23	Comp24	Comp25	Comp26	Comp27	Comp28	Comp29	Comp30	Comp31	Comp32	Comp33	Comp34	Comp35	Comp36	Comp37	Comp38	Comp39	Comp40	Comp41	Comp42	Comp43	Comp44	Comp45	Comp46	Comp47	Comp48
Dermatemys_mawi	SEA	-0.00497176	-0.0308055	0.0165526	0.030483	-0.00524421	0.0453147	-0.0118819	0.00516661	-0.00716644	0.0052456	-0.00397782	0.00208401	-0.000227212	-0.00577628	-0.00258198	0.00332009	-0.00320785	0.000632238	-0.00157908	0.00233948	-0.00152256	0.00119109	-0.0056671	0.00103865	-0.00181952	0.00134132	-0.00333032	-0.000277003	0.00220519	0.000676876	-0.000558015	7.63e-05	0.00127324	0.0002312	-0.00128968	-0.000712748	-0.00024235	0.000812726	0.000519349	0.00088212	-0.000954569	-0.000976661	-0.000768863	-0.000158368	0.000245019	0.000634856	0.00110201	0.000884072
Staurotypus_triporcatus	SEA	0.0163728	0.0595654	0.095036	0.0742152	-0.0489189	-0.00861051	0.0197802	-0.000118909	0.00513067	0.00280424	-0.00620245	0.00158806	0.00249394	0.00951687	-0.00202967	0.00340167	-0.00259488	0.00191407	0.000121662	0.00146516	0.00188669	0.000408507	0.00124952	-0.00125217	-0.00170615	0.00330819	-0.00374893	-0.00019775	-0.000446895	-0.00220608	0.00279986	-0.000530113	0.000272986	0.000472981	-0.00141525	-0.000228952	-0.000417637	0.000145601	0.00215428	0.000224431	0.00133148	0.00189889	-0.000676792	0.00109211	9.36e-05	0.000990364	-0.00048102	0.00114167
Claudius_angustatus	SEA	-0.0498264	0.0746758	0.141854	0.0650647	-0.0282859	-0.035915	0.00640076	0.00379761	-0.0149364	0.0017551	0.00021385	-0.00386043	0.00131387	0.000750439	-0.00322671	-0.00414446	-0.00237424	-0.00272977	-0.00350456	-0.000626611	-0.00225632	-0.00467543	-0.00324121	-0.00238563	0.00120349	0.0012556	0.000921973	-0.000255277	-0.00132036	0.000164295	0.000295073	-0.000389055	-0.00125242	0.000688395	-0.00115739	-0.000240951	-7.6e-05	-0.000586675	-0.00201215	-0.000220025	-0.000632133	-0.000645584	-0.000817034	-0.000972953	-8.94e-05	-0.000546731	-2.8e-06	-0.000183269
Sacalia_quadriocellata	SEA	-0.038493	0.0101429	-0.00267944	0.0359516	0.0169589	0.00666585	-0.0188334	-0.0130649	0.00298364	-0.011066	-0.00158982	0.00429984	0.00402216	-0.00112776	-0.000694045	0.00229858	-0.000657308	0.00270133	-0.000838964	-0.00289205	-0.00118428	0.00122885	0.00143394	-0.00604772	-0.00320417	0.00108511	-0.00128733	0.00190267	0.00174597	0.00234718	-0.00248077	0.000848615	-0.00129863	0.000419952	0.000471203	0.000214825	-0.00154222	0.00044863	-0.00095958	-0.00154919	0.00228836	-0.000450793	0.000526699	-0.000599204	0.00075377	7.53e-05	0.000949635	-0.000546457
Mauremys_reevesii	SEA	-0.1015	-0.0149827	0.0293107	-0.0374556	-0.0248399	-0.028775	-0.00847836	-0.0102903	0.0042299	0.00244421	0.0122358	0.00386173	0.00134811	-0.0130991	-0.0007901	-0.00230091	-0.00759201	-0.0139912	0.000399229	0.00133928	-0.00108609	-0.0023591	0.00114343	-0.0014635	0.000462778	-0.00305864	-0.0020529	-0.000688701	0.00153522	-0.00175573	0.000952608	-0.000871968	0.00113291	-0.00114553	-0.000225633	0.00040592	0.000674112	0.000610366	0.000332948	0.00246022	-0.000662967	0.000384479	0.00108783	0.000236507	0.000560372	-0.00075298	-0.00013161	-0.000566831
Apalone_mutica	FUA	0.308443	0.0303239	0.0147846	0.0312486	-0.0600069	0.00746336	-0.00472615	-0.0170985	-0.00652293	0.005646	-0.000699262	-0.0165793	0.00598332	-0.00204368	-2.47e-05	0.00423624	0.00306374	0.000689138	0.00174884	-0.00823818	-0.000759459	0.00356351	0.00118732	-0.00076846	0.00183472	-0.00196451	-0.000477895	0.00174258	0.000757965	0.00132909	0.000632389	-0.000535181	0.000370041	0.0020148	-0.000200733	0.0023388	-0.000957164	0.000379947	0.000934947	0.00117846	-0.000184384	4.02e-05	-0.000548741	-0.000132894	-0.000676289	-0.00088632	-0.000969402	0.000223675
Pelusios_sinuatus	SET	-0.0303565	-0.0221276	-0.0261928	-0.0347342	-0.0634557	-0.00485327	-0.0029937	0.00526694	0.000972632	-0.000842305	-0.00531622	0.00658151	-0.00254451	0.0019708	0.0071769	0.000209487	-0.00140029	-0.00193335	0.00258959	-0.00323684	0.000187424	-0.00400175	0.00233173	-0.00121129	0.00162185	-0.0017323	-0.000402316	-0.000785028	0.00141335	-0.00121454	0.000817602	-0.00106222	0.000841117	-0.000568236	0.0018251	0.0022446	-0.00188166	-0.000114971	0.00101234	-0.00163286	-0.00144845	0.0027344	-0.000345703	-0.00227598	-0.000802265	-0.000157517	0.000395588	-0.0010936
Elseya_novaeguineae	SEA	-0.0161169	0.0127874	0.0117919	-0.0172802	-0.0107952	0.0205647	-0.0124159	-0.0113973	0.00360499	-0.00575072	-4.52e-05	0.00523719	-0.00333151	0.00591941	-0.000962162	-0.00245576	0.00385946	0.000486259	0.00126245	-4.3e-05	0.000214511	0.00278268	-0.000908111	-0.000482898	0.0018454	0.000103144	-0.000970395	-0.000198791	0.00167001	-0.00200039	-0.00086359	-0.00121497	-0.000239271	0.000402676	0.000294488	0.000823087	0.00156737	0.000532451	0.00121553	0.000852181	-0.000570046	-0.0012692	-0.000995993	-0.000212822	0.00224843	-0.000216404	-0.00133486	-0.00114487
Chelydra_serpentina	SEA	0.159905	0.0665961	0.00833267	-0.0503024	-0.00246977	-0.00735316	0.0214145	-0.0083924	0.0144906	-0.0122231	-0.0120423	0.00234105	-0.000360015	-0.00112126	-0.0019812	0.00270009	0.00222653	0.00481377	-0.00455783	0.00355512	0.000486111	-0.00156588	-0.00489075	0.00107165	-0.000557936	0.00219853	0.00191154	0.00292153	-0.000844189	-0.000411136	-0.00164259	1.47e-05	-3.84e-05	0.000941016	-0.00121734	-0.000332541	8.62e-06	0.000924789	-0.000938364	0.00211058	-0.000257996	0.00066584	0.00236825	-0.00157173	-0.000710451	-0.00143728	-0.000509689	-0.00210413
Carettochelys_insculpta	FME	0.0372545	0.0487558	0.00841408	-0.00842881	-0.00735301	0.0283653	-0.0176007	0.00479795	0.00972392	0.0106109	0.00396177	0.00829631	0.00588331	-0.00552471	-0.0044651	0.00183887	0.00443239	-0.000637826	-0.00269026	0.00152029	-0.00261958	0.0013956	0.00174841	0.00264546	0.00179948	0.000768729	-0.000697504	0.000556438	-0.00137878	0.00354566	4.34e-05	-0.000960665	-0.000368647	0.00187028	-0.000809645	-0.000950615	-5.72e-05	-0.000576488	-0.00027467	0.00101629	-0.00280728	-0.000556084	-0.00109258	-0.00129963	0.00188723	0.000686241	-0.00056704	0.000563513
Emys_orbicularis	SET	-0.107225	-0.0671793	0.0150158	-0.0239094	0.0195859	-0.00193797	0.00550162	0.00319865	-0.00599895	0.00354365	0.00650192	0.00288791	-0.000445734	0.00596131	0.00301288	0.00153951	0.00451643	0.00390301	-0.00031937	-0.00256575	-0.000450134	-0.000166804	0.00270638	-0.00321649	0.00141343	0.000620124	-0.000321775	-0.000339918	-0.00174072	-0.000614895	-0.00176398	-0.000196664	0.00204037	0.000190356	0.00234337	0.00221431	-0.00125235	-0.00303967	-0.00087056	0.00306753	0.000548899	0.000103701	0.000565905	0.000289183	0.000197251	-0.00120673	-0.000316809	0.00124293
Pelomedusa_subrufa	SEA	0.0843196	-0.056798	-0.0098012	0.0314112	-0.0440805	-0.0106086	-0.0102526	0.0123541	-0.00822932	-0.00526453	-0.0105577	-0.00542705	-0.00451298	0.00359668	-0.00205494	0.000622514	0.00126987	-0.00348329	-0.000781347	0.004217	-0.00454605	0.000356898	0.00200184	0.00311312	-0.00321311	-0.00327114	0.000673669	0.000592909	-0.00341732	0.00251287	0.000543437	-0.00254107	-0.00151647	-0.00208483	-3.5e-05	0.00172173	-0.000819136	-0.000839031	-0.00200931	0.000773812	0.000290794	-0.000442988	0.00274638	0.000401367	0.00182282	0.00138141	0.000557143	0.000764866
Psammobates_tentorius	TER	-0.106473	0.190628	-0.0505103	-0.00741762	-0.00866765	0.00954219	-0.00499493	-0.00909502	-0.00159018	0.0153057	-0.0116393	-0.00625488	0.00470463	-0.00507549	0.0194298	0.00149598	0.000309001	-0.000849587	-0.010842	0.00253659	0.00298029	0.00413632	-0.000905797	-0.00118146	-0.000602847	-0.00129771	-0.000538837	-0.000415138	-0.00169185	-0.0039178	-0.00114274	6.44e-05	-0.0020951	-0.000888112	0.000147191	-0.000134509	0.00234256	-0.001178	-0.000906529	-0.000254951	3.33e-06	0.000339184	-0.000391423	-0.000184939	0.00025579	0.000154909	0.000220656	0.000255815
Homopus_femoralis	TER	-0.0234266	0.0107257	-0.0329689	0.0329882	0.0167631	0.00946025	0.0245544	-0.0166161	0.000455499	0.0120073	0.00356719	0.00712775	0.00181776	-0.000412242	-0.00125649	-0.00414431	-0.000138175	-0.000104774	-0.00222978	-0.00461857	-0.00158461	-0.000928223	0.00339098	0.00244465	-0.000790794	-0.000745102	-0.00116801	-0.000804361	0.00159954	0.00409734	-0.000657795	-0.00117147	-0.00187998	-0.00134654	0.000309722	-0.00428944	-0.00187467	-0.00213831	-6.73e-05	0.000485277	0.000659568	-1.39e-05	0.000308303	0.000383837	-0.00122172	-0.00108095	-0.000857051	8.79e-05
Kinixys_belliana	TER	-0.0167741	0.0521862	-0.0756503	0.00311533	0.0281755	0.00261051	0.019178	-0.0133546	0.0124133	0.00903878	-0.00615143	-0.00700866	0.00187625	-0.0057302	-0.0122665	0.00363738	-9.81e-05	-0.00136909	0.00180519	-0.00200207	-0.00290302	-0.00358943	-0.000561037	-0.000913798	-0.000790903	0.00247476	0.00149484	-0.00475289	0.001724	-0.000966393	-0.000720613	-0.00341821	-0.00145359	0.00176945	0.00135939	0.000174177	0.00189192	-5.86e-05	0.000435967	-1.8e-05	0.000557721	0.00111839	0.00129856	0.000787006	0.000891545	0.000588564	-6.75e-05	0.000361432
Rafetus_euphraticus	FUA	0.233389	0.0744974	0.00797672	-0.084124	-0.0346449	-0.0275471	0.00735743	-0.00707295	-0.00290346	0.00662408	0.00488883	0.000217202	-0.00787351	0.00180055	-0.00624227	-0.00680148	-0.00617588	0.00635543	-0.00483893	-0.000264181	0.00153817	0.00052835	0.00168271	0.00141639	-0.00295521	-0.00301011	0.00290077	-0.0012169	0.00269473	-0.000808762	-0.00331552	0.00303425	0.000885208	-0.00111901	-0.000298708	-3.18e-05	1.85e-05	-0.000610274	-3.18e-05	-0.000383176	0.000680767	0.000822724	-0.00120643	0.000648229	0.00158774	0.00052311	-0.000298036	0.0006876
Platysternon_megacephalum	SET	0.0981591	0.0111871	0.0614155	-0.0201195	0.0419823	0.0116784	0.012849	-0.0067385	-0.00185865	0.00739248	0.00783337	0.0102286	0.00139507	-0.00315421	-0.00112018	0.00303261	0.00152816	0.000329545	0.00239838	0.000917859	0.00229436	0.00271246	-0.00036216	-0.00386304	-0.000902394	-0.00187876	-0.000987453	0.00219918	-0.00117324	-0.000327931	0.0018794	-0.002036	0.00231818	0.000204813	0.001837	0.00259849	0.00161869	-0.00140837	-0.00134135	-0.00153865	0.00134706	6.56e-05	0.000642237	-0.000696056	-3.42e-05	-0.000373082	0.000525123	0.000397996
Pelodiscus_sinensis	FUA	0.197508	0.0887582	-0.0536549	-0.0557303	0.0258821	0.01464	-0.0169881	0.00337054	-0.00916618	-0.000183285	-0.00153387	0.008274	0.0112346	0.0110826	0.00179239	-0.0044467	-0.00856052	-0.00535796	0.00290748	0.00231066	4.16e-05	-0.00129161	0.00101378	-0.002844	0.00152583	0.00303501	-0.00367625	0.00355197	-0.00164504	0.00188187	0.000717605	0.000866011	-0.00294612	-0.0012804	-0.000723735	-0.000386	9.52e-05	0.00030995	0.000782973	0.000258787	0.000447552	0.000674143	0.00120815	0.00056583	-0.000696525	0.000651624	-0.000646447	7.09e-05
Stigmochelys_pardalis	TER	-0.0200845	0.114671	-0.0703659	0.00549076	0.00693945	0.00946953	-0.00610758	0.0373825	0.00829749	-0.00359993	-0.00573063	-0.000661592	-0.000336433	0.00252528	-0.00578033	-0.00868413	0.00316291	-0.00101644	-0.00086229	-0.000168639	-0.00570071	0.00470305	0.00190582	-0.00420839	-0.00157401	-0.00110967	-0.00314216	-0.0012671	0.00165868	-0.000845468	0.000203273	0.00138899	0.00267501	0.00422609	0.000557566	-0.000737414	0.000378455	0.00036916	-0.0012297	0.000249939	-0.00151116	0.00159056	8.89e-05	0.000443618	-0.000318228	-0.000727314	0.000377735	-0.000179567
Dermochelys_coriacea	FME	-0.00256138	0.100764	0.0458623	-0.114501	-0.00595458	0.0441195	0.0105707	-0.00230978	-0.000465722	-0.00114197	0.00795622	-0.00231341	-0.00691769	0.00919665	0.00252537	-0.00108353	0.00365646	-0.00352825	0.00118931	-0.00174836	-0.00251097	-0.000944573	-0.00533255	0.00324926	0.00167931	0.000494835	-0.00239763	-0.0037683	0.000342176	-0.00126901	0.00318111	-0.00210384	-0.00205384	0.000131737	-0.000304474	-0.000356601	-0.00169736	0.000182579	-0.00141606	-0.000622014	0.00144375	-0.000681428	-0.000160364	-0.00105061	-6.09e-05	0.000146609	0.000653684	0.000307791
Chelonoidis_carbonaria	TER	-0.0448163	0.0599267	-0.0381116	0.0184782	0.00963397	-0.000496936	0.028906	0.00403416	-0.00360025	0.0083711	0.00721091	0.00250242	-0.000513203	0.00367944	0.000774377	-0.00685285	0.00325357	0.00275693	9.84e-05	-0.00336143	0.000507032	0.000583219	-0.0016862	0.000539195	0.00218815	0.00202696	0.00252826	0.00430276	0.0025661	-0.00263971	0.00208945	0.000194173	0.00126692	4.74e-05	0.00015969	4.1e-05	7.65e-05	0.000649415	0.00261691	0.0013431	0.000431508	-0.00112424	0.00183874	-0.00122616	0.00102747	0.00229679	0.000699075	-0.000280426
Rhinoclemmys_annulata	SET	-0.0716093	-0.0101147	-0.0326905	-0.0296591	-0.0117376	-0.00890234	-0.010806	0.00997984	0.00325192	0.00646449	-0.0143413	0.00213146	-0.000704446	0.00355055	-0.00735188	-0.00131223	-0.00163294	-0.00297128	-0.00330465	-0.000605935	0.00590871	0.000989782	-0.00397485	-0.00161082	-0.00425384	-0.00160379	0.000877357	0.000567108	0.00224827	0.00072405	0.0002911	-0.0019798	0.00227626	-0.000528107	0.000328951	-8.55e-05	-0.00150195	-0.00114162	-0.00158675	0.000674462	0.000558266	-0.00203688	-0.000640793	-0.000983803	-0.00251341	0.0007329	-0.00122392	0.000270519
Emydura_macquarii	SEA	0.0409233	-0.0202255	0.0503622	-0.0212301	-0.0267674	0.0131891	0.00614353	-0.000319514	0.0031617	-0.00480391	0.00688135	-0.00887898	0.000553992	0.00240678	0.00124145	0.00354412	0.000460227	0.00113724	0.00120423	0.00442172	-0.00175169	-0.00294362	0.00351723	-0.00678868	-0.0047308	0.00181472	-0.00242174	-0.0020651	0.000335436	-0.00115621	0.00150076	0.0014443	0.00147593	-0.00149453	0.000868025	-0.00156966	0.00130742	0.00112413	-0.000762159	0.000921312	0.000334024	-0.00121731	0.000832261	0.000494357	5.57e-05	0.000614354	-0.000287589	-0.000804414
Astrochelys_radiata	TER	-0.0893166	0.118127	-0.0636446	0.0324957	0.00298656	-0.014621	-0.00356951	0.00673042	-0.014721	-0.00545336	0.0010213	-0.00335643	-0.00472575	-0.00714272	-0.00203145	0.000126136	0.00272155	-0.00125431	0.00384139	0.00189699	0.00346141	0.00123513	-0.00235416	0.00121866	-0.00286318	0.00248331	-0.00191464	-0.00231415	-0.00154062	0.0022358	-0.00129046	0.00210228	0.00338034	-0.00333051	-0.000673075	0.00108157	0.000100093	0.000321183	0.00165204	0.00106662	0.00163405	0.000167345	-0.000181306	-0.00190789	0.000478175	-0.000257811	-8.05e-05	0.000550658
Pyxis_arachnoides	TER	-0.0285155	0.0961589	-0.0528913	-0.000218	0.0304148	-0.0212231	-0.0118593	0.00574463	-0.00804075	-0.00809547	0.0178435	-0.00892555	-0.00760595	-0.00413615	-0.00540369	0.00253574	0.00157134	0.00377925	-0.00189486	0.0071407	0.0065501	0.000124061	0.00312181	0.00145988	0.00146116	-0.00328486	-0.0032814	0.00344993	0.00158723	-0.00198787	0.000637758	-0.00235051	-0.00267397	0.00175285	9.84e-05	0.00013279	-0.00253807	-0.000168063	-0.000425066	0.000569528	0.00032422	0.000197029	-0.000847577	0.000422731	-0.000602764	0.000975823	-0.00016985	-0.000925067
Phrynops_tuberosus	SEA	0.074291	-0.0337548	-0.003547	0.0325042	0.00410247	-0.0248311	-0.0139687	-0.00482697	0.00451835	-0.0111156	-0.00227458	-0.00274703	0.00803715	-0.00370953	-0.000509971	0.00556156	0.00041325	0.00127075	0.00565475	0.000296341	-0.00200233	0.00380593	0.00118119	0.0013748	0.00046432	0.00277297	0.00053411	0.00135474	0.000665059	-0.00327256	0.00331852	-0.000287705	0.000908181	-0.00187582	0.00191454	-0.00339787	0.00129484	-0.00228276	8.37e-05	0.000337245	-0.000534028	-0.000730127	-0.00183685	-0.000897542	-0.000571469	0.000438096	0.000204308	-0.000185584
Podocnemis_vogli	SEA	0.0107114	-0.0351899	-0.015387	-0.0300949	-0.0137427	0.0149098	-0.00652051	-0.00404456	0.0119854	-0.000743549	0.00490954	0.00485693	-0.00725969	-0.00403622	-0.000874597	0.00228269	-0.00479596	0.000611676	-0.00168339	-0.00222099	-0.00490279	0.000689316	0.00102319	0.00215848	5.72e-05	0.000306128	0.000427088	-0.00206159	-0.00366386	-8.71e-05	-8.9e-05	0.000837237	0.00180332	-0.000811542	0.000695498	-5.97e-07	-0.000536288	-0.000576887	0.000122753	-0.000199116	0.00165196	-0.000125641	-0.00066629	-0.000471622	-0.000505578	0.00074546	0.000202986	-0.000870956
Lissemys_punctata	FUA	-0.0394321	-0.0738528	-0.0444078	-0.068812	-0.00290015	0.0318332	-0.00211935	-0.00581484	-0.0186357	-0.0102566	0.00186205	-0.00712945	0.0101364	-0.00467578	-0.000174718	-0.0052972	-0.00656846	0.00542575	0.00438239	0.00109611	-0.000572194	-0.00124284	-0.00254985	-0.00236663	-0.00104716	0.00113716	-0.000193147	-0.00209756	-0.000489803	0.000469151	-0.00164926	-0.00168171	-0.000442002	0.000509988	-0.000345729	-7.88e-06	0.00138959	-0.000420391	-0.00033303	0.00020095	0.00042701	0.00149274	-0.00177089	-0.000406073	-0.000271001	0.000284203	-0.000835664	0.000208521
Chelodina_oblonga	FUA	-0.0434631	-0.0860452	0.083642	0.0437172	-0.0041976	0.00342953	0.00680486	0.00326866	-0.00167234	-0.00292414	0.00500881	-0.00150195	0.00241317	-0.0019432	0.00266318	-0.00119802	0.00360832	0.00165892	-0.00348168	-0.00309058	-0.000777087	0.00118935	-0.00318663	-0.00192606	-0.00121718	-0.000280421	-0.000298564	0.000482784	0.00134965	-0.000964802	-0.000201268	0.00289942	-0.0016001	-0.000714981	0.00227657	-0.00196049	-0.000239182	-0.000773055	-0.00139207	0.00145619	0.000284823	0.000242401	0.00044013	0.000331841	0.00029439	0.000246828	-0.000386813	-0.00064313
Mesoclemmys_dahli	SEA	0.0280183	-0.00697965	0.0156866	0.013408	0.0262566	-0.000119035	-0.00872436	-0.0192549	-0.000669756	-0.00529508	0.00626684	0.00206492	0.000424814	-0.00377829	0.000152195	0.0010406	0.000896204	-0.00278898	-0.00286327	0.000170091	0.000766804	0.00393469	0.00395301	0.0018274	-0.000732523	-0.00162844	-0.00089343	-0.00256141	0.00135887	0.000569005	-0.000249573	0.00217998	-9.73e-06	0.000593632	0.000875075	-0.000267202	0.00101359	0.000639238	-0.000565619	-0.000857507	-0.00104226	0.000591593	0.00161445	-0.000268625	-0.00115754	0.0011073	0.00104046	8.42e-05
Chersina_angulata	TER	-0.0586778	0.0853856	-0.0360482	0.0131242	-0.0057477	0.000194694	0.00727981	0.00282754	0.0052967	-0.000588839	0.00156123	-0.00400415	0.00217837	0.000459498	-0.00142543	0.00687494	-0.00302223	-0.00104168	-0.000144193	-0.0010943	-0.0035816	-0.00474711	-0.00407051	0.000925558	-0.00518961	-0.000532861	0.00100651	0.00395698	-0.00169042	0.000500218	-0.00122762	-0.00173877	9.01e-05	-0.000556448	0.0031735	-0.000415687	-0.00210451	-0.00128366	0.00168995	-0.00127864	-0.00151834	0.000430138	-0.00136028	0.000698449	0.000523328	0.000146206	0.00137524	-0.000700233
Gopherus_polyphemus	TER	-0.0392923	0.0617298	-0.0495508	0.0174489	0.0284189	-0.00356168	0.00616436	0.0075793	-0.00868378	0.00242807	0.00119538	0.000683356	-0.00207624	-0.0114731	0.000346196	0.000780704	0.00176725	0.00216796	0.00288697	-0.00335258	0.000146336	0.00221403	-0.00402701	0.00170773	-0.000183085	-0.000176677	-0.000217748	0.00054447	-0.00507111	0.00152971	0.00299789	0.000921601	0.000322906	-0.001625	0.000268889	-0.000259941	-0.000206885	0.00122055	0.000158534	-0.000291433	6.45e-05	0.00124624	0.000943445	0.000843179	0.000221892	-0.000598929	-0.0021743	-0.000381871
Sternotherus_odoratus	SEA	-0.00428872	0.0950926	0.0579417	0.0588085	0.00451943	-0.0114513	0.0101626	-0.00580565	-0.000478182	-0.00140748	0.00479738	0.000476033	-0.00464809	-0.000267857	-0.00326737	0.00188174	-0.00455799	-0.00273521	0.000880842	0.00738119	0.000894751	-0.000581717	-0.00181472	-0.000920231	0.00301944	-0.00188591	0.00218893	0.00122267	-0.000149238	0.000122112	-0.00308811	-0.00146021	0.000617469	0.00102553	0.00169436	-0.000888546	0.0017905	-3.54e-05	0.00152551	-0.00119225	-0.000783494	0.000264137	0.000755006	-0.000231965	-0.000767215	-0.000766352	-0.000708718	0.00113885
Graptemys_geographica	SEA	-0.067727	-0.0815281	0.0236357	-0.00681502	0.0125493	-0.000574988	-0.0265379	0.00976747	-0.00661243	0.00241615	-0.00264732	-0.00185997	0.00245339	-0.00845158	-0.00378372	-0.00404028	-0.000554806	0.00393129	0.000382268	-0.00270686	0.00284409	-0.00280867	-0.00270659	-0.00322451	0.00152995	0.00151163	0.00204476	-0.000986993	0.0010877	-0.00264083	0.00128923	0.00039034	-0.00266895	-0.00142094	0.000931786	0.000637367	-0.00177905	0.000835966	5.56e-05	-0.00131131	-0.00169851	-0.00082718	0.000772135	0.00022206	0.00144233	-0.000787932	-0.000730943	0.000292889
Clemmys_guttata	SET	-0.0294758	-0.057381	-0.0136564	0.0215026	0.00491	0.00105232	0.0116318	-0.00704664	-0.0098999	-0.00139325	0.000615868	0.00441163	-0.0127478	0.00344488	-0.00294034	0.00513451	-0.00261911	0.000761647	0.00187437	0.00119678	-0.00331651	0.000723932	-0.00203155	-0.00388304	0.00399637	-0.00194009	0.00133542	-0.00104981	-0.00401346	-0.000278998	-0.0017478	0.00168262	-0.000828074	0.000807586	-0.00250703	-0.000747072	0.000124593	0.000473584	-0.00113517	0.000495564	-0.00053473	0.000101103	-0.00160306	5.94e-05	-0.000286125	0.00125827	-1.03e-05	-0.00103283
Deirochelys_reticularia	SEA	-0.110128	-0.00519584	-0.010763	-0.0117902	-0.0170719	-0.00525841	-0.00870085	-0.0142527	-0.00214062	-0.00170842	0.000112674	0.00207229	-0.00197441	0.00370506	-0.00373132	-0.000508324	-0.000398428	-0.000641344	-0.00472047	-0.00601587	-0.000240055	0.00268433	0.00104766	0.00283728	0.000327087	-0.00103751	0.000523179	0.00127673	0.000217622	0.00132261	-0.000165105	-0.000175514	0.000639868	-0.00126712	0.00140381	0.000402057	0.00166927	0.00276489	0.000185315	-0.00102321	0.000162477	-0.000685693	-0.000405266	-0.000120012	-0.000374759	0.00106328	-0.000303889	-0.000282604
Malaclemys_terrapin	SEA	-0.0945828	-0.0257517	0.00337702	0.0114335	0.0279103	-0.0114117	-0.0373406	-0.0318192	0.00339099	0.0121255	-0.00959768	-0.00121044	-0.00923264	0.00104431	0.00883784	-0.0037546	-0.00110851	0.00861342	0.0057722	0.00358143	-0.0053972	-0.00714591	0.00015609	0.00156598	-0.00126577	-0.00310205	-0.000980909	0.00327796	0.0014272	0.000737967	0.00254268	0.000113133	0.00252453	0.0021523	-0.00133737	-0.0010635	-1.05e-05	0.000339789	-0.000619792	0.000594015	0.000491676	0.000604917	0.000334257	-0.000117238	0.000397512	-0.000105436	-0.000182831	0.000434608
Kinosternon_baurii	SEA	-0.0649931	-0.0519161	0.0022309	0.0291458	-0.0316818	0.0127847	0.0277507	0.0127029	-0.00810722	-0.00234133	0.0066347	0.00903128	-0.00133059	0.00221558	0.00728293	0.00183574	-0.00130245	0.00460628	0.0046036	0.00316564	-0.00226987	0.00507782	-0.00395268	0.00370215	-0.00476683	-0.0045149	0.000927373	-0.00162185	0.00363084	0.000500136	0.00169388	-0.000253194	-0.000956853	0.000202301	-0.000938549	0.000259198	0.000504357	0.000293843	8.23e-05	-0.000759497	-0.0013719	0.000651205	0.00081868	0.00129524	-0.000665941	-0.000584121	-0.000532612	-0.000210782
Emydoidea_blandingii	SET	-0.0703016	-0.135659	-0.0452034	0.0149454	-0.035446	-0.00224638	0.000191264	0.0131708	-0.0164675	-0.000781448	0.000937672	0.00626711	0.00374433	0.00582535	-5.75e-05	-0.000588822	-0.00213753	0.00195104	-0.0024361	0.000282716	0.00208079	-0.000631959	0.00214248	0.000568227	-0.000141735	0.00237876	0.00230084	0.00390675	0.00125618	0.0014022	-0.000467599	-0.00301336	-3.52e-05	0.00123593	0.000792576	-0.000522938	0.00344417	0.00129549	-0.000822919	-0.000786803	0.000906575	-0.000140799	-4.75e-05	-0.000479974	0.000536709	-0.00102743	0.000482179	5.79e-05
Eretmochelys_imbricata	FME	0.100258	-0.0581937	0.0532384	0.0110061	0.0216844	0.0378564	-0.00233821	-0.0114257	0.0121529	0.00687695	0.00610048	-0.00601704	-0.00996905	-4.89e-05	0.000969187	-0.00535685	-0.00287748	-2.92e-05	0.00129657	0.00101287	0.0090921	0.00384351	0.00217437	-0.000167311	-0.00534286	0.00479751	0.00198146	0.000386753	-0.00198695	0.000869251	0.000829482	-0.00224846	0.000409215	-0.00141193	-0.000641135	-0.000162811	-0.000903911	0.00193426	-0.000696811	-0.000259001	-0.00211195	0.000524098	-0.000308258	-3.1e-05	5.59e-05	-0.00143641	0.000985825	-5.79e-05
Geochelone_elegans	TER	-0.100896	0.120463	-0.0555118	0.0167043	0.00826259	-0.00346903	0.0152742	-0.00375358	-0.00686274	0.00472207	0.00138716	-0.0062943	-0.00255412	0.00211607	0.00245428	-0.00238982	0.00311177	0.000647303	0.000359114	0.00172002	-0.00532355	0.0013866	0.00513827	-0.00736138	0.00121182	0.000535232	0.00591942	-0.000972548	8.7e-05	0.00241596	0.00179866	-0.00100128	-0.000545569	-0.00156638	-0.00121775	0.000870601	-0.00118803	0.00164657	0.000307919	0.000505032	-0.000497842	-0.000970212	-0.0010847	0.000718225	-0.000730759	-0.000464449	0.000833086	-0.000265159
Chelonia_mydas	FME	0.0649889	-0.0964247	0.0303769	0.0549949	0.0292146	0.0501337	0.00100183	0.0100158	-0.00288503	0.00458401	-0.00658788	-0.0175776	-0.0062484	0.00453373	0.000317169	-0.00783182	0.000912263	-0.00633345	-0.0029833	0.00387353	0.000371132	-0.00289438	-0.000334969	0.00281768	0.00357732	-0.00141956	-0.000507732	0.000728125	-0.000991503	0.000777605	-0.000417519	0.00167351	0.00207968	0.000568841	0.002586	-0.000152851	0.000738418	-0.000656146	0.00151683	-0.00133128	0.00126973	-0.000189397	-0.000152391	0.000431436	-0.00042336	-0.000239262	-0.000340192	-0.00113371
Actinemys_marmorata	SEA	-0.0391415	-0.126756	-0.0192176	0.0016016	0.00403444	0.00323271	-0.00927668	0.00140238	-0.00271061	0.0086511	0.00822135	0.00018866	-0.00249413	0.00439028	0.00303122	0.00448133	-0.00443043	-0.00537516	-0.00319815	-0.00249667	-0.000814019	0.00212875	-0.00345979	0.000840545	0.00156016	0.00279005	0.000300045	0.00307612	0.00114571	0.000346093	-0.00153095	0.00125624	0.000500433	0.000639949	0.00111289	0.000708038	-0.000863298	0.000876777	-0.000859266	0.00244691	-0.000307643	0.00125918	-0.000380654	0.00156168	-0.000300906	0.00044799	-3.58e-05	4.63e-05
Terrapene_carolina	TER	-0.08231	-0.0175031	-0.0667256	0.0301238	-0.061014	0.0199428	0.017792	-0.00779152	-0.00307997	0.0142827	-0.00197238	-0.000376955	0.00211768	-0.00426084	-0.000208041	0.00497095	-0.00145811	-0.00146381	0.00875228	0.00380697	0.00505491	-0.000731398	0.00276746	0.00190895	0.0032818	0.00482696	-0.000133577	-0.00121806	0.00148454	-0.000260608	-0.00198023	0.00275762	0.000504055	0.00220866	-0.000533619	0.000651555	-0.00117492	-0.000942142	-0.00260573	-0.00156483	0.000203752	-0.00133181	0.00115322	2.78e-05	0.000138164	0.000454966	-0.00022042	-0.000875115
Testudo_graeca	TER	-0.0371618	0.0566182	-0.0411463	0.0405802	0.0298884	0.0142032	-0.00453154	0.00628222	0.0185655	-0.00926086	0.00673394	-0.00817711	0.00221231	0.010422	-0.000827937	0.00743818	-0.00943448	1.26e-05	-0.00276566	-0.000411287	-0.00138463	0.000646176	-0.00139609	-0.000153031	0.00361003	-0.00288227	0.00174079	-0.000436341	0.00441289	0.00195103	0.00270301	0.0021311	0.00033655	-0.00226878	-0.00175393	0.00106242	0.000508359	-0.00116658	-0.000916109	-0.00130836	0.000407284	-0.000520719	0.000316948	-0.00124862	0.00121149	-0.00153693	-0.000773931	0.000609921
Hydromedusa_tectifera	FUA	0.111161	-0.0394888	-0.0189262	0.0739443	0.00269503	-0.00695932	0.00985057	0.00940776	0.0170592	-0.00619898	-0.00366325	0.00535784	-0.00159579	-0.0110849	0.00501127	-0.00528511	-0.00184855	0.00459048	-0.0045818	0.00283518	-0.00415005	-0.00182008	0.000832304	0.00253556	0.00464599	0.00502809	-0.00213431	-0.000521113	0.0032565	-0.000268123	-0.000511147	-0.00183559	-0.00020088	-0.00346119	8.92e-05	0.00290165	-0.000530772	0.00126951	-0.00111845	0.000559674	0.000572652	-9.78e-06	-0.00106305	0.00102573	-0.00104993	0.000384623	0.000102436	0.000322955
Orlitia_borneensis	SEA	-0.0436471	-0.0289929	0.0283091	0.0135342	-0.0055604	0.0180353	-0.00380679	-0.00312901	0.000984877	-0.00857572	0.00559867	-0.0024091	0.00915862	0.00267227	0.00438381	0.00141474	0.00579944	-6.63e-05	-0.00303543	0.000233985	-9.21e-05	-0.00239383	0.000976444	0.000846889	-0.000923947	-0.000373096	0.00231679	-0.00152249	-0.000366932	0.00410898	-0.00130897	0.0001983	-2.62e-05	-0.00050105	-4.75e-05	5.75e-05	0.000347171	0.000125666	0.00127836	0.0002794	-0.000191121	0.0018574	-8.06e-07	-0.00044228	0.000547329	0.000828565	-0.000166454	-0.000875821
Cuora_amboinensis	SEA	-0.0678626	0.0174792	-0.0197499	-0.0432946	0.00599074	-0.0246936	-0.0111682	-0.0117537	0.00248335	-0.00152466	-0.00227862	-0.00363651	0.00334247	0.0103966	-0.00412114	-0.000204503	0.00268575	-0.00186113	0.002561	-0.00155722	0.000353022	-0.000750003	-0.000915023	0.00386533	0.000189566	0.00207248	0.00240589	-0.000598643	-0.000886823	2.27e-05	0.00108605	0.000532497	0.000662027	-0.00130805	-0.0018265	0.00130374	0.00275937	-0.00100224	-0.000598333	0.00132823	-0.00168226	-0.000632154	-0.000284835	0.00172912	-0.00141508	-0.000318414	0.000809081	-0.00030222
Notochelys_platynota	SEA	0.0416216	-0.0072075	0.0222131	0.0277237	0.0250458	-0.0478141	-0.00457016	-0.000922489	-0.00462837	0.00926567	0.0062074	0.00258828	0.00482876	-0.00151627	-0.000555478	-0.00472024	0.000794554	-0.00262025	-0.00118516	0.00183284	-0.00320116	0.00141781	-0.000162698	0.00339793	-0.00518568	0.00337843	-0.000550798	-0.000731502	-0.00012025	0.00160341	0.00220796	0.00271887	-0.00229323	0.00321147	-0.000925628	0.00321209	0.000565844	-0.00131828	0.000611629	-0.00133478	0.000685173	-0.00063141	-0.00107096	-0.000982595	-0.000186233	-0.000407491	1.01e-05	-0.00124246
Cyclemys_dentata	SEA	0.00862181	-0.0230954	-0.0330578	0.00287538	-0.0308805	0.0062959	0.000870959	-0.00263384	0.00137287	0.000274937	-0.00314895	0.00673624	0.000257227	-0.00360188	-0.00323572	-0.00157057	0.00242573	0.000696748	-0.00145432	-0.0017531	0.00298737	-0.00163704	-0.00253467	-0.00167724	0.00115226	-0.00313304	-0.00451606	0.000156385	-0.000449763	0.000316723	-5.33e-05	-0.000223115	-1.76e-05	-0.000683144	-0.00234521	-0.00018162	0.000796961	-0.00152816	0.00218901	-9.15e-05	0.00144555	-0.00150717	-0.000403981	0.00236212	0.000770253	-0.00215005	0.00195005	-0.00129039
Batagur_dhongoka	FUA	0.0322103	-0.0107331	0.0403306	-0.0324998	-0.024934	0.000938688	-0.0279042	0.0155938	0.00763323	-0.000318494	0.00725556	0.00145992	-0.00222768	-0.00424707	0.00189239	0.00102385	0.00813622	0.00433894	-0.00177068	0.00299784	0.0015103	-0.00300856	0.00110799	-0.000276527	0.00182342	0.00175855	0.000685279	-0.0017622	0.000579999	0.00216219	-0.000673777	-0.00116389	0.000365824	-0.000691186	-0.00145027	0.000202084	0.00097613	-0.0027358	0.00101707	-0.00119592	-0.000285068	0.000262936	0.00074621	0.000789257	-0.000974823	0.000583705	-0.000678109	-3.45e-05
Vijayachelys_silvatica	TER	0.0437445	-0.00200724	0.024445	0.0247059	0.0382545	-0.0075777	-0.00132341	-0.000302202	0.00931729	0.00767257	-0.00358835	0.0108245	-0.00381279	0.0080874	-0.00111153	0.0036326	0.00214498	0.00258219	0.00257982	0.00152795	0.00218084	0.000898962	-0.00288434	-0.0043891	0.00199983	-0.00193891	-0.00167491	-0.0012777	-0.00160482	0.00151828	-0.00165196	0.000115522	-0.00105818	-0.00112199	0.000752971	0.00187237	0.000824665	-1.06e-05	0.000589183	-0.000184542	-0.0012809	-6.79e-05	-0.000644237	9.39e-05	-0.000345674	0.000820529	3.51e-05	4.08e-05
Melanochelys_trijuga	SEA	-0.100066	-0.0362561	0.00658353	0.00341153	-0.0226234	-0.000734803	-0.00256506	0.00284728	0.00379932	0.00232106	-0.00497443	0.00363456	-0.000563915	0.0015431	-0.00373932	-0.00140735	0.00156787	0.000550098	-0.00301349	-0.00227364	0.0042722	-0.000615966	0.00460174	-0.00190342	0.000294562	-0.00251761	-1.69e-05	-0.000341413	-0.00171752	-2.22e-06	0.00233747	-0.000587441	0.000369243	-0.00100778	-0.000762542	-0.00161345	0.00046301	0.000440802	0.000408934	-0.00156657	-0.000224627	-0.000249714	0.000326519	0.000361256	-0.000109127	0.000935386	-0.00136382	-0.000710512
Caretta_caretta	FME	-0.0894026	0.0641356	0.0991385	-0.000501646	0.0338661	0.040961	-0.0048453	0.0195491	0.00120229	0.00622662	-0.00370393	0.00186133	0.00459581	-0.00385413	-0.00376128	0.00362071	0.00370271	-0.00330672	0.00597422	-0.0030184	-0.00367014	-0.00164301	0.00568056	0.00324893	-0.00282661	-0.00265838	0.00223761	0.00388857	0.0010964	-0.00473565	-0.00414478	0.000513226	-0.00110943	-0.00208133	-0.0036306	0.000835419	0.000239714	0.00113674	-3.69e-05	9.37e-05	0.00136048	0.000433043	-0.00055027	-0.000318061	-0.000855551	-0.000328018	-0.000362381	-3.46e-06
Dogania_subplana	FUA	0.303448	0.0599044	-0.0272111	-0.0104476	-0.0162597	-0.00596432	-0.0140958	0.0126373	-0.0122727	0.00876089	0.00158656	0.0030361	-0.000177046	-0.00295747	0.00109927	0.000498794	0.00380592	0.000383264	0.00603755	0.00014361	-0.000729179	-0.00159442	-0.00169781	-0.000440068	0.00241775	-0.00224249	0.00286013	-1.02e-05	0.0013478	-0.000493497	-0.000342053	0.00173992	-0.000229817	-0.00216433	0.00173817	-0.00250784	0.000586504	0.000331189	-0.000687515	-0.000335449	-0.000427184	-0.00045249	0.000424596	-6.66e-07	-0.000475913	-0.000303298	0.00136835	0.000253107
Heosemys_spinosa	SEA	-0.0677782	-0.0513298	-0.0364669	-0.00929006	-0.021546	-0.00347817	-0.0104902	-0.00043802	0.0150795	-0.00215313	-0.00831739	-0.00036163	-0.0045208	0.00318144	-0.00361254	0.00285145	0.00147472	-0.00236493	0.0029983	0.00138463	0.0042277	0.00326152	0.000764031	0.000804566	6.05e-05	0.000388107	0.00153501	0.00161792	-0.00100094	-0.0014709	0.00145837	0.00319479	-0.00273321	0.000141911	0.000843139	-5.01e-05	-0.00100978	-0.00039542	-7.92e-05	0.000308857	0.000668108	0.00151778	-0.000414471	0.000903752	0.000938881	-0.000880143	0.000100896	0.000492565
Chelus_fimbriata	SEA	0.103748	-0.0171528	-0.0154755	-0.0515059	0.032279	-0.00301509	0.0281059	-0.0110683	-0.0108833	-0.0200693	-0.01013	0.00358136	-0.0106346	-0.00519298	0.00786841	0.00174851	0.00436831	-0.00886429	-0.000372705	-0.00164891	-0.00194069	-0.00143078	0.00182001	-0.00117167	-0.00230208	0.00227991	-0.00062806	0.00278089	0.00233266	-0.000169875	-0.000410243	0.000317926	0.00115481	0.000814429	-0.000562963	0.000362446	-0.000439217	-0.00111819	0.00010033	-0.00193827	-0.00164094	-0.00157095	-0.000856241	0.00138181	0.000892551	0.000269042	-0.0014323	0.000832863
Macrochelys_temminckii	SEA	0.0347274	0.11693	0.0832301	0.00307591	0.0470838	0.00366996	-0.00465795	0.00658071	-0.0159345	-0.00910523	-0.0147272	0.0102185	0.00664234	-0.00123248	0.00258363	0.00329223	-0.00515743	-0.000170676	-0.000505219	0.000146346	0.00551223	-1.65e-05	0.00334585	0.00396028	0.00265064	-0.000839573	0.00456284	-0.00456633	0.000744063	0.00100507	0.0021454	-0.000948425	0.00210083	0.00212308	0.00141233	-0.000443677	-0.00157608	0.000506685	-0.000415186	0.00164174	0.00116206	0.000276149	-0.000743755	0.00125413	0.00109661	-2.75e-05	0.000650763	-0.000898068
Malacochersus_tornieri	TER	0.114577	-0.186731	-0.0634197	-0.00684089	0.0445609	-0.0217191	0.0239873	0.00304133	-0.00303349	0.00958608	0.000679596	-0.00241042	0.0159872	0.00681839	0.000583476	0.00383747	-0.000454311	0.00221412	-0.00431179	0.00362641	-0.000629609	-0.00193619	0.00261327	0.00182634	-0.000686452	-0.00352378	-0.00295109	-0.0023966	-0.00253035	-0.00354026	-0.000693134	-0.000262374	0.00204118	-0.000836491	-0.00129519	-0.000169522	-0.00191699	0.00167585	0.00029517	-0.000487352	-0.00134659	-0.00114022	-0.000245815	-0.000887922	0.000670099	-0.000562324	-0.00018209	-0.000192281
Malayemys_subtrijuga	SEA	-0.0968481	0.0317469	0.0311218	0.0191146	0.0150306	-0.00665209	-0.00560144	-0.0155736	-0.0159987	-0.00696952	-0.0102348	-0.00216367	-0.003351	0.00614183	-0.00442742	0.00059821	0.00161617	0.00352364	0.000186484	-0.00289666	0.00115362	-0.00109297	0.00120596	0.00263746	0.000629415	0.00011314	-0.00565299	-0.00259778	0.00180392	-0.00035981	-0.00171615	0.00144137	-0.00182099	-0.000930944	0.00154831	0.000614237	-0.000268098	0.000911836	0.00108434	0.000224967	-0.00208841	-0.000200759	0.00130874	-0.000652678	-0.000950558	-0.000520899	0.000631479	0.000648714
Indotestudo_elongata	TER	0.078755	0.0723184	-0.0503275	0.0847587	0.00771304	-0.00856184	-0.00559999	0.0184478	0.00964426	-0.0100939	0.0106797	-0.00113909	-0.00629744	0.00468255	0.00989396	-0.00136127	-0.00484403	0.000828271	0.00369465	-0.010545	0.00534325	-0.00550095	0.00150379	0.00210496	-0.00228771	-2.38e-05	-0.00115074	-0.00172817	-0.00275198	-0.00142921	-0.00212686	-0.00125324	-0.000314341	0.00227432	-0.00119091	-0.000595176	0.00168941	-0.000443568	-0.000928328	0.000852747	-0.000532941	-0.00123159	0.000308605	-0.000185268	0.000192465	0.0002382	-2.59e-05	0.000196053
Pangshura_tentoria	SEA	-0.0367494	-0.0202679	-0.0129647	-0.0405864	-0.0308388	0.0200795	-0.0100045	0.00325226	0.00424587	-0.00782874	0.00333657	0.00318265	0.00102499	-0.00481164	0.00286158	0.00368698	-0.00300889	0.00185329	-0.00386034	0.00318971	-0.00113891	-0.00113695	0.00125359	-0.000330432	-0.00112855	-0.000452128	0.00366541	-0.000797764	-0.00222807	-0.000375842	0.000722484	0.00179627	-0.00139263	0.00354054	0.000712018	0.000334219	-0.000862079	0.00127985	0.00343447	0.000959911	0.000681481	-0.00272386	0.000790516	1.93e-05	-0.00169309	-0.000729273	-3.4e-05	0.00158914
Morenia_petersi	SEA	-0.0736758	-0.00692032	0.00680795	0.0262875	-0.024828	0.0129802	0.0171206	-0.0174402	0.00565879	-0.0173773	9.78e-05	-0.000143206	0.00912795	-0.00572289	-0.00263245	-0.0101565	-0.000732953	0.000109971	0.000825891	-0.000660187	0.00125884	0.00330629	-0.000359964	-4.01e-05	0.00391624	-0.00280402	0.000177906	0.00263451	-0.00338739	-0.000549309	-3.55e-05	0.000366186	0.00168004	0.000369202	-0.00251958	-0.000476908	-0.00134611	-0.00126404	-0.00080267	-0.000694964	-0.000718645	0.000467299	0.000461304	-0.000412437	-8.63e-05	0.000440812	0.00111863	0.0012055
Geoemyda_spengleri	TER	-0.058009	-0.0403177	0.00899169	-0.0309176	0.0239695	0.0015332	0.0131115	0.000366835	0.0121002	-0.00238575	0.00105174	-0.00206268	0.0101964	0.00204634	0.00170575	-0.00607869	0.00185607	-0.000895094	0.00295118	0.00228715	0.00457395	-0.00433566	-0.00240622	-0.00014998	-0.00171792	-0.000709258	0.00310053	-2.24e-06	0.00102298	0.000506469	-0.000272294	0.00259323	-0.000461549	-2.87e-05	-7.86e-06	0.00105984	-0.000742292	-0.00141001	0.000479416	0.000420325	-0.000834101	0.000289115	-0.00031658	0.000378044	-3.83e-05	0.00129952	0.000359233	0.00048824
Manouria_impressa	TER	-0.00155378	0.0161987	0.00302509	-0.0288225	0.00221359	0.00274645	0.00215932	-0.000544822	0.00300175	-0.00150578	0.00338146	-0.000709639	0.00563616	-0.00481137	-0.00492215	0.000960534	0.0013519	0.0038612	-0.00283507	-0.00373336	-0.00111581	-0.00385276	-0.00199862	0.0018428	0.00058688	-0.0010952	-0.000756131	0.00116882	-0.00281789	-0.00155481	0.00191532	0.00124803	0.000575941	0.00109616	0.00147823	0.00145731	0.00120395	0.00204942	-0.00217877	-0.0018633	0.000519353	8.01e-06	-0.000149471	0.00167297	-0.000728484	0.000342133	0.000143073	0.000759841
Platemys_platycephala	SET	0.0844527	-0.15749	-0.0232565	0.0279964	0.0095265	-0.0170173	0.0129427	0.000977845	0.0136753	-0.00171776	-0.00754842	-0.000404583	-0.00182992	-0.00484539	0.00299194	-0.00367845	0.00374881	-0.00466227	0.00541232	0.000406233	0.00227107	0.000687073	-0.00144535	-0.00160225	-0.000407388	-0.00540537	0.00047211	-0.00175055	0.000467513	0.00122078	0.000271994	-0.000733472	-0.00358334	0.00104469	0.000894585	-0.000137752	0.00116941	0.00149354	0.000120489	0.00151617	0.00180168	-0.000144721	-0.00142943	-0.00136904	-9.16e-05	0.00041593	0.000112948	0.000612777
Trachemys_scripta	SEA	-0.0318143	-0.050907	0.00406576	-0.0195013	0.00200538	0.0023523	0.0055348	0.00450055	-0.00206806	-0.000539192	-0.0034573	0.00318165	-0.00872085	0.00175505	-0.00342414	-0.00468645	-0.00476479	0.00279555	0.000376005	0.00161544	-0.00553532	0.003081	0.00435277	0.00252893	0.00038078	0.00306854	0.000437415	-0.000117776	-0.0030287	-0.00317742	-3.28e-05	0.000128591	-0.00207092	-0.00043851	0.00189433	-0.000314526	0.0005064	-0.00191498	0.000786281	-2.9e-05	-7.29e-05	-0.000218994	3.34e-05	-0.00115778	0.000107951	-0.00101642	-1.82e-05	0.000160455
Glyptemys_insculpta	SET	0.0318524	-0.0511581	-0.0263062	-0.0102475	0.00488663	-0.0183674	0.00285764	0.00718863	-0.0018238	0.00256045	0.00194103	0.0049149	-0.00674088	-0.000685441	-0.000171149	0.00512835	0.00581163	-0.0040931	-0.00586742	-0.00129332	0.00205559	-0.00547107	-0.000107559	-0.00160274	0.000951819	0.00332835	0.000371807	-0.000116676	6.2e-06	0.000357955	0.00163017	0.00195058	0.000431143	0.000804781	-0.00190953	-0.00227601	-0.000116433	0.00133502	-0.000103434	-0.000699532	0.000486475	0.00186213	-0.000535802	-0.00113506	0.000206712	-0.000637696	0.000550995	0.00143226
Chrysemys_picta	SEA	-0.0434492	-0.0895895	-0.0257671	-0.0359154	0.00378333	-0.0110695	0.000367947	-0.00335066	-0.0101153	-0.0056646	0.00446456	-0.0056352	0.000577654	0.00404688	-0.00168571	0.00258639	0.00718622	-0.00138748	-0.00176236	0.00229096	0.00045595	0.00153999	2.93e-05	0.00234077	0.00119774	0.000996802	-0.000270393	0.000374799	0.00160854	-0.00052341	-0.000499805	-0.00191491	5.66e-05	-5.11e-05	-0.00140812	-0.000899669	0.000715237	-0.000141164	-0.000207739	-0.000120928	0.00107939	0.00137257	-0.000275921	-2.06e-06	1.05e-05	-0.000739022	0.000476961	0.000471111
Proganochelys_quenstedti	UKN	-0.0926098	-0.0549778	0.0879909	-0.125704	0.0220677	-0.035118	0.0229671	0.0260514	0.0063092	0.00629875	-0.00832525	-0.0137738	-0.00312107	-0.00785928	0.00394863	0.00424708	-0.00697439	0.00416146	0.00251995	-0.00408648	0.000744435	0.00365445	0.00203397	-0.000221437	0.00288772	0.000261317	-0.00302485	0.00197187	0.000576144	0.00482738	-0.000379339	2.42e-05	-0.000501332	0.000590565	-0.000954819	-0.000801528	0.000993928	-0.000167581	0.000947078	-0.000178496	-0.000397674	-0.00038158	0.000544871	-0.000216815	0.000194991	0.000559105	0.000903883	-0.0001849
Proterochersis_robusta	UKN	-0.0822601	0.0813925	0.0368348	-0.0320223	-0.0196372	-0.0488067	-0.00862342	0.000595174	0.0157086	0.000326822	0.00459984	-0.000787083	0.00766356	0.00721402	0.0061526	-0.00366622	0.00406251	-0.00168749	0.00572825	0.00283496	-0.00191857	0.00356991	-0.00211465	0.00207362	0.00151641	0.0016005	-0.00108758	-0.000660185	-0.00125966	0.00101618	-0.00389482	-0.00109866	0.00135488	0.000187032	0.00179583	-0.00166836	-0.00190903	0.00283389	-0.000419107	-0.00158976	0.00115591	-0.00104378	-0.000329957	0.000870386	0.000615406	-0.000686155	-0.000568067	0.000368297
Plesiochelys_bigleri	UKN	0.0762041	-0.110887	0.00332958	0.0213003	0.0300859	-0.0209323	-0.0297627	-0.00101679	-0.00303797	0.00163521	-0.000336653	-0.0024902	-0.00115592	0.000712438	0.00248023	5.76e-05	-0.00179669	-0.0020304	-0.00118122	-0.00337065	-0.00262876	0.00580621	-0.00409904	-0.00240055	0.000345264	0.00173299	0.00309041	-0.002743	0.000356562	-0.00341708	-0.0015363	-0.00251326	0.000979114	0.00110365	-0.00302163	-0.000755212	-0.00181369	-0.00107478	0.00162607	-0.00166379	0.000783645	0.000586967	0.00200019	0.000512552	-0.000388816	0.00073411	8.31e-05	-0.0003561
[truncated: 24 more columns]
