# Supplementary material for: The ecomorphology of the shell of extant turtles and its applications for fossil turtles
Source: PeerJ. 2020 Dec 22;8:e10490. doi: 10.7717/peerj.10490 (PMC7761203; doi:10.7717/peerj.10490)
Supplement: Supplemental Information 17 [file peerj-08-10490-s017.xlsx]

## Sheet: SET1_resampled
	V1	V2	V3	V4	V5	V6	V7	V8	V9	V10	V11	V12	V13	V14	V15	V16	V17	V18	V19	V20	V21	V22	V23	V24	V25	V26	V27	V28	V29	V30	V31	V32	V33	V34	V35	V36	V37	V38	V39	V40	V41	V42	V43	V44	V45	V46	V47	V48	V49
Dermatemys_mawi	-0.353	-2.16	11.4	-0.478	3.16	-12.3	-0.581	0.367	-8.6	-0.212	-5.78	9.69	-6	0.381	-5.74	-5.19	-2.62	6.42	5.28	-0.0342	-5.82	5.46	-3.33	6.11	-7.36	-2.75	-0.0311	6.76	-3.06	-0.0666	0.0012	-2.08	11.4	0.824989	-2.2522	11.1675	1.62238	-2.52815	10.9398	2.38802	-2.82009	10.6332	3.14899	-3.06732	10.288	3.89849	-3.15952	9.8491	4.60868
Staurotypus_triporcatus	-8.66	3	-2.78	9.85	-0.297	5.46	5.83	-2.85	2.4	-6.37	-0.134	-2.84	5.02	0.266	-3.31	-1.28	1.21	-6.17	0.142	-3.1	5.6	-6.15	-2.07	2.91	1.85	0.201	-5.09	-3.17	-3.2	4.55	-8.72	2.96	-2.7	-9.03043	2.62928	-2.11885	-9.28421	2.24159	-1.54738	-9.48986	1.76028	-1.03024	-9.62	1.16767	-0.624484	-9.5665	0.577384	-0.192335	-9.38723
Claudius_angustatus	4.86	0.805	1.63	-4.02	2.21	-1.24	-2.56	-0.39	-1.16	3.44	-0.853	0.823	-1.98	0.105	2.03	-0.257	-0.399	2.64	0.147	0.978	-3.03	1.81	0.657	-2.42	-1.09	-0.216	2.24	0.904	0.749	-2.66	4.87	0.809	1.58	4.92949	0.825899	1.25253	4.97146	0.797666	0.921767	4.99	0.717995	0.592892	4.90677	0.63516	0.277801	4.7882	0.60409	-0.0362438	4.65024
Sacalia_quadriocellata	2.82	-0.771	1.6	-3.25	1.37	-2.19	-2.41	0.471	-2.06	2.4	-2.04	0.646	-2.27	-1.08	0.824	0.249	-2.09	1.74	0.537	0.937	-2.64	2.67	-0.439	-1.12	-1.24	-1.91	1.29	1.8	0.0703	-2.28	2.87	-0.767	1.56	3.05095	-0.764905	1.32905	3.19275	-0.762275	1.07176	3.30081	-0.755797	0.797807	3.37266	-0.727937	0.516117	3.42	-0.674622	0.239506	3.43706
Mauremys_reevesii	-5.4	3.07	0.0947	6.61	2.32	1.8	6.1	0.0254	0.955	-5.29	0.573	-0.833	2.6	2.32	-2.48	-2.38	2.66	-3.26	1.61	0.0206	3.72	-3.22	0.131	3	0.572	1.8	-3.23	-0.573	-0.786	3.43	-5.41	3	0.189	-5.45849	2.73056	0.549817	-5.48	2.45131	0.906299	-5.54	2.20438	1.2758	-5.53312	1.95936	1.6544	-5.43556	1.70556	2.00555	-5.28972
Apalone_mutica	3.69	3.78	-4.26	-1.98	-1.87	5.24	0.0678	-0.765	2.32	3.65	2.42	-4.9	4.05	-0.455	2.52	6.23	0.928	-1.52	-2.81	1.15	-0.117	-0.621	2.67	-4.48	5.76	0.0322	0.37	-2.15	2	-2.89	3.62	3.8	-4.27	3.117	3.83	-4.329	2.61654	3.81776	-4.41224	2.13421	3.69903	-4.51	1.63651	3.6173	-4.55	1.1422	3.51073	-4.52037	0.663902
Pelusios_situatus	-14.3	3.55	-5.17	16.7	-2.44	5.05	13.3	-5.73	2.58	-15.3	0.897	-6.86	9.47	0.674	-7.5	-6.87	2.13	-12.8	2.38	-6.51	8.52	-13	-4.87	1.82	2.76	-0.0553	-11.9	-4.82	-8.1	5.88	-14.4	3.44	-5.02	-15.0785	2.82368	-4.16014	-15.4	2.10692	-3.20647	-15.7	1.34459	-2.29247	-15.9	0.518018	-1.40002	-15.8052	-0.421344	-0.590981	-15.6868
Elseya_novaeguineae	-5.68	4.71	-2.78	6.36	-4.36	4.65	4.44	-4.58	1.94	-5.87	2.19	-5.16	5.51	0.674	-0.839	-1.35	4.32	-4.04	-0.978	-3.57	4.32	-6.08	1.11	-0.192	2.44	2.68	-3.97	-4.73	-2.33	2.04	-5.81	4.61	-2.69	-6.17188	4.25406	-2.39723	-6.54641	3.91937	-2.09203	-6.80501	3.47748	-1.80623	-7.00124	3.0219	-1.48314	-7.11986	2.54151	-1.16096	-7.09202
Chelydra_serpentina	1.23	0.45	-12.2	0.877	-0.244	11.5	0.928	3.54	6.72	1.33	6.35	-12.6	-9.15	4.3	2.88	-9.12	6.78	-3.44	11.5	4.92	2.44	11.2	6.51	-2.86	-9.8	6.31	-1.47	11.8	6.05	-1.07	1.32	0.46	-12.2	2.36622	0.856733	-12.1	3.36774	1.37734	-12	4.4165	1.83354	-12.0471	5.41845	2.31845	-12.2	6.31672	2.98836	-12.0833	7.27708
Carettochelys_insculpta	-12.1	-19.1	30.5	7.8	13.5	59.9	-1.01	10	54.1	-20.5	-14.4	30.1	-9.1	-2.08	57.1	-21.1	-12	48.9	0.0254	7.77	38.8	-9.15	0.424	26.3	-18.2	-6.58	53.3	-6.65	5.55	30.3	-12.1	-19	30.3	-11.8501	-17.9501	28.9003	-11.9	-16.6561	27.7561	-11.773	-15.373	26.8	-10.8177	-14.2177	26.1177	-9.85254	-12.9751	25.4751	-9.10908
Emys_orbicularis	-4.08	3.08	0.289	6.5	0.805	1.08	5.86	-0.376	0.292	-4.1	1.06	-1.09	2.37	2.59	-2.62	-0.8	2.81	-3	1.06	-0.766	2.89	-1.85	-0.45	2.24	0.493	2.09	-3.13	-0.619	-1.07	2.13	-4.09	3.02	0.361	-4.14242	2.75546	0.668208	-4.18505	2.47968	0.967352	-4.21	2.18956	1.25363	-4.18208	1.85834	1.48375	-4.11355	1.53419	1.71936	-3.97072
Pelomedusa_subrufa	-5.02	2.3	-0.583	5.4	-0.375	2.69	3.53	-0.791	1.63	-4.96	1.39	-0.808	2.23	1.47	-1.54	-1.38	2.37	-2.69	0.0146	-0.829	3.97	-3.85	0.159	2.97	0.17	0.883	-2.73	-2.17	-1.39	3.26	-5.03	2.26	-0.537	-5.24098	2.14935	-0.19944	-5.42519	1.99481	0.139857	-5.55393	1.81214	0.48473	-5.62	1.62444	0.849395	-5.61552	1.44209	1.22135	-5.55097
Psammobates_tentorius	-0.19	3.96	-3.74	-0.21	-2.45	3.61	-0.205	-2.14	2.17	-0.329	2.14	-5.05	3.18	-0.628	0.544	2.28	1.92	-3.88	-3.49	-0.417	0.697	-2.91	1.89	-3.81	3.41	0.312	-2	-3.87	0.465	-1.87	-0.227	3.96	-3.74	-0.513733	3.97	-3.67573	-0.854604	3.99728	-3.89544	-1.1934	3.8483	-4.07	-1.5244	3.7076	-4.0272	-1.86499	3.63167	-4.24249	-2.25067
Homopus_femoralis	-0.555	5.02	-2.47	1.44	-1.58	2.96	1.09	-0.963	2.12	-0.551	3.58	-3.4	3.42	1.17	0.716	1.99	3.4	-2.5	-2.07	0.365	1.81	-2.43	2.4	-1.75	3	2.2	-1.32	-2.69	1.31	-0.308	-0.599	5.01	-2.47	-0.891335	4.90621	-2.45621	-1.22255	4.84248	-2.51	-1.52584	4.68805	-2.54195	-1.81044	4.50978	-2.59	-2.07922	4.30539	-2.54	-2.36944
Kinixys_belliana	-0.783	4.93	-4.12	0.694	-3.42	5.01	0.54	-2.69	3.8	-0.898	2.83	-5.92	4.24	0.463	1.55	2.5	1.82	-3.97	-4.03	-0.313	2.22	-3.77	1.41	-3.34	3.7	0.776	-1.22	-4.1	0.173	-0.508	-0.81	4.92	-4.14	-1.18164	4.93	-4.42082	-1.65933	4.93	-4.60983	-2.14028	4.81	-4.70514	-2.56783	4.58217	-4.74406	-2.90861	4.21139	-4.76241	-3.29644
Rafetus_euphraticus	-5.35	-4.21	10.6	7.68	13.6	-11.3	4.63	5.49	-9.49	-6.22	-10.4	8.26	-6.91	7.7	-5.3	-11.5	-2.22	1.39	10.2	1.72	0.158	4.79	-8.36	6.68	-8.8	4.56	-3	9.08	-1.66	2.46	-5.27	-4.25	10.6	-4.30879	-4.6517	10.9	-3.16404	-4.94228	10.9	-2.11069	-5.1531	10.7	-1.03104	-5.40061	10.547	0.0168459	-5.57	10.2	1.12136
Platysternon_megacephalum	3.89	0.568	-2.32	-5.28	-1.44	3.27	-3.28	0.277	3.21	4.03	3.14	-0.288	-2.19	2.61	-0.849	0.252	3.43	-1.76	1.14	-1.13	3.51	3.12	0.0865	2.43	-1.28	3.18	-1.24	2.2	-0.399	3.01	3.96	0.532	-2.25	4.23744	0.41353	-1.93505	4.54079	0.296016	-1.63921	4.8292	0.245448	-1.31264	5.10512	0.242493	-0.97689	5.37628	0.235186	-0.632762	5.54639
Pelodiscus_sinensis	-0.793	-0.0735	3.81	2.16	5.27	-7.43	1.42	3.27	-4.99	-1.36	-3.27	3.35	-3.64	3.34	-3.2	-4.66	1.51	-1.35	5.16	1.7	-1.78	4.63	-0.659	0.912	-4.15	2.04	-2.26	5.05	0.488	-0.576	-0.705	-0.0953	3.88	-0.260746	-0.222414	4	0.182798	-0.356663	4.05657	0.65284	-0.450246	4.09786	1.12205	-0.545166	3.9951	1.58224	-0.626202	3.85011	2.02153
Stigmochelys_pardalis	0.174	8.17	-5.81	-0.81	-6.32	9.14	-0.404	-5.06	5.77	0.479	5.8	-8.41	5.92	-1.68	3.47	5.19	3.89	-4.47	-6.63	-2.05	2.34	-4.49	4.23	-5.33	6.03	0.24	0.0757	-6.17	-0.267	-1.17	0.118	8.17	-5.86	-0.555472	8.12702	-6.3749	-1.36031	7.97981	-6.57006	-2.07023	7.70391	-6.94414	-2.67798	7.35401	-7.4	-3.26657	7.10718	-7.71282	-3.98155
Dermochelys_coriacea	3.82	3.3	0.758	-7.68	1.37	2.7	-5.47	-0.72	1.99	4.95	-0.325	-0.179	-4.17	0.774	4.19	3.03	0.856	3.81	-4.87	1.21	-0.247	1.93	2.3	-2.44	0.258	0.699	4.91	-0.805	2	-2.68	3.82	3.31	0.669	3.83	3.36	0.257998	3.83407	3.37203	-0.151888	3.93	3.37178	-0.548227	3.78504	3.13672	-0.830626	3.52194	2.97	-1.08806	3.21969
Chelonoidis_carbonaria	-2.06	3.99	-4.64	2.2	-3.67	6.41	1.66	-3.49	4.84	-2.11	1.37	-5.45	4.1	-1.93	0.238	1.92	1.12	-4.95	-3.15	-2.37	2.61	-4.89	-0.244	-2.45	3.67	-1.09	-2.06	-4.31	-1.55	0.606	-2.11	3.97	-4.64	-2.65189	3.88969	-4.68031	-3.15075	3.71444	-4.66963	-3.59451	3.46032	-4.50032	-3.99545	3.13682	-4.33227	-4.47138	2.87917	-4.29	-4.92321
Rhinoclemmys_annulata	2.79	0.00974	5.99	-4.5	1.91	-7.62	-3.83	-0.277	-6.84	3.24	-2.61	5.9	-6.03	-0.244	-0.53	-2.18	-2.12	5.61	2.7	0.456	-5.1	5.98	-1.46	1.59	-5.19	-1.8	2.19	4.62	-1.1	-2.97	2.88	0.00989	6	3.51262	-0.0184152	5.9586	4.13599	-0.036503	5.84234	4.7216	-0.131641	5.6192	5.24571	-0.36895	5.36238	5.62672	-0.682951	5.00328	6.01793
Emydura_macquarii	-0.0915	6.04	-4.32	0.387	-4.57	7.16	0.459	-4.73	3.61	0.101	3.63	-6.13	4.39	-1.19	2.31	4.1	3.16	-3.07	-3.94	-1.53	2.26	-3.53	2.89	-2.93	4.78	0.157	-1.04	-4.51	0.0538	-1.2	-0.179	6.04	-4.33	-0.759655	5.96549	-4.33	-1.33027	5.82589	-4.33	-1.88929	5.65828	-4.3	-2.41456	5.40597	-4.24649	-2.89872	5.0894	-4.15376	-3.35805
Astrochelys_radiata	5.37	1.2	0.538	-4.19	-0.13	-1.37	-3.18	-0.509	-1.48	5.28	-0.432	-0.663	-1.9	-1.22	1.27	3.19	-1.57	1.4	-1.64	1.89	-2.84	3.72	1.6	-2.93	0.611	-1.99	1.65	0.796	1.61	-3.5	5.37	1.22	0.402	5.42092	1.29729	0.062909	5.59909	1.46455	-0.218103	5.66003	1.57992	-0.564931	5.52793	1.62896	-0.877443	5.56294	1.65411	-1.26351	5.49542
Pyxis_arachnoides	-5.38	1.5	1.96	5.77	-0.223	-1.12	4.53	-0.929	-1.54	-5.72	-1.06	0.407	2.29	2.03	-2.83	-3.79	1.29	-1.62	3.53	-0.957	2.43	-2.83	-1.59	3.08	-0.931	1.46	-3.08	0.302	-1.93	3.09	-5.39	1.46	2.01	-5.42118	1.22291	2.37354	-5.47756	0.805757	2.49732	-5.43998	0.413955	2.71004	-5.28	0.0545099	2.90376	-5.21357	-0.363689	3.05643	-5.03892
Phrynops_tuberosus	-2.18	-3.44	15.9	1.76	6.58	-16.8	0.998	1.29	-12.8	-1.75	-9.27	12.6	-8.57	2.15	-6.33	-9.79	-2.14	4.79	8.97	2.59	-4.29	7.55	-1.55	6.92	-10.2	-1.78	-1.67	9.72	-1.45	0.415	-1.95	-3.5	15.9	-0.776193	-3.65219	16.2	0.458346	-3.67	16.4	1.69232	-3.67705	16.2432	2.8532	-3.74851	15.8	3.91244	-3.75	15.1813	4.92882
Podocnemis_vogli	3.22	12.6	5	-1.9	-15.1	-5.17	-4.22	-11	-4.9	-1.42	14.7	3.23	1.13	-2.87	-8.69	2.41	10.6	-3.75	-5.2	-6.64	4.34	-3.97	7.19	7.88	0.684	4.86	-8.7	-7.62	0.358	7.2	3.12	12.7	5.13	2.41186	12.7881	6.0134	1.53821	12.8	6.76884	0.586897	12.8	7.43451	-0.206866	12.4186	8.10514	-1.0097	11.8878	8.67219	-1.79488
Lissemys_punctata	-1.75	3.06	-2.64	5.01	-1.78	5.85	4.53	-2.26	4.89	-2.68	1.12	-4.13	5.71	-0.649	0.54	2.33	1.47	-4.13	-0.107	-1.63	4.62	-3.91	-0.143	0.665	3.93	0.272	-3.1	-3.3	-1.01	1.82	-1.79	3.05	-2.62	-2.18005	2.91399	-2.41798	-2.60886	2.82623	-2.27934	-3.04	2.77159	-2.15664	-3.14866	2.51925	-1.91209	-3.39202	2.29747	-1.59646	-3.55573
Chelodina_oblonga	-5.07	7.54	-4.98	6.22	-2.73	7.58	4.68	-4.01	4.07	-4.22	3.75	-5.9	6.98	1.98	0.38	2.55	4.92	-3.62	-1.31	-1.73	6.68	-4.87	1.59	1.09	4.66	3.03	-2.39	-3.93	-0.234	2.94	-5.19	7.5	-4.89	-5.64189	7.19811	-4.52165	-6.05941	6.87379	-4.13059	-6.4266	6.52675	-3.71011	-6.64394	6.1301	-3.23615	-6.79018	5.70892	-2.75874	-6.86273
Mesoclemmys_dahli	-5.14	0.523	5.94	6.53	5.34	-6.29	4.49	3	-5.53	-5.22	-2.85	3.16	-1.22	5.58	-4.92	-5.06	3.73	-0.0177	6.18	1.01	0.221	1.42	-0.763	4.47	-3.52	4.14	-3.86	4.47	-0.903	1.58	-5.07	0.469	5.99	-4.60666	0.147163	6.285	-4.11098	-0.140823	6.57314	-3.58023	-0.459091	6.73773	-3.01444	-0.755359	6.79	-2.42875	-1.00472	6.77	-1.81069
Chersina_angulata	1.95	-0.58	3.85	-1.57	3.41	-4.69	-1.1	2.3	-4.03	1.76	-2.2	2.76	-3.18	1.32	-1.25	-0.907	-1.49	1.97	2.43	2.34	-3.08	3.41	-0.621	0.621	-2.45	-0.558	0.256	3.27	0.614	-1.62	2	-0.577	3.82	2.34592	-0.685572	3.71204	2.68007	-0.825029	3.57996	2.94429	-0.954144	3.33571	3.19324	-1.06883	3.06794	3.44669	-1.13	2.78414	3.68915
Gopherus_polyphemus	-3.65	-0.928	6.87	3.85	0.977	-7.8	3.06	-0.143	-6.45	-3.65	-4.68	5.51	-2.83	2.16	-5.24	-6.21	-1.45	1.62	6.37	0.0246	-1.11	1.6	-2.86	5.37	-5.37	-0.286	-2.86	5.08	-2.6	2.13	-3.62	-0.913	6.83	-3.00197	-1.10682	6.85561	-2.50481	-1.42139	7.20139	-2.02821	-1.74089	7.56854	-1.41042	-1.87319	7.49681	-0.845258	-2.20122	7.52092	-0.284697
Sternotherus_odoratus	-2.09	3.62	-2.23	2.73	-2.27	3.44	1.88	-2.18	1.39	-1.45	1.47	-3.05	3.21	0.423	-0.614	1.74	1.92	-2.55	-1.54	-1.67	1.32	-2.96	-0.344	-0.561	2.66	0.989	-1.74	-2.44	-1.21	0.363	-2.14	3.6	-2.23	-2.43894	3.43737	-2.2	-2.69909	3.21818	-2.15	-2.93205	2.96726	-2.12	-3.1407	2.69395	-2.12	-3.28365	2.38722	-2.05635	-3.38084
Graptemys_geographica	-4.64	4.12	-4.68	5.88	-1.42	9.14	5.41	-3.52	6.49	-4.1	0.874	-6.07	6.46	1.2	1.52	1.03	3.37	-5.37	-1.9	-2.78	6.04	-6.53	-0.166	-1.02	4.88	1.49	-2.79	-4.21	-2.98	2.98	-4.73	4.09	-4.65	-5.28653	3.7226	-4.4013	-5.8011	3.24779	-4.27223	-6.40359	2.8976	-4.1488	-6.84323	2.47602	-3.78527	-7.27214	2.06755	-3.39725	-7.59928
Clemmys_guttata	3.83	2.8	-1.14	-4.97	-0.79	2.43	-3.99	-1.01	1.83	3.81	1.05	-1.58	0.119	-0.619	3.52	3.29	0.133	1.92	-2.58	0.891	-1.82	0.552	1.5	-3.34	1.82	-0.71	2.76	-1.33	0.848	-2.98	3.81	2.81	-1.18	3.62654	2.86551	-1.50795	3.48432	2.84432	-1.86271	3.41121	2.8	-2.23514	3.225	2.76833	-2.56667	2.98718	2.72	-2.86282	2.71228
Deirochelys_reticularia	1.87	5.34	-8.13	-1.27	-4.04	8.82	-1.09	-5.44	6.6	1.79	1.88	-9.54	4.89	-1.9	4.13	6.14	1.35	-4.43	-5.77	-1.24	2.62	-3.55	2.06	-5.68	5.54	-1.77	-0.767	-4.59	-1.2	-2.16	1.77	5.33	-8.17	1.10432	5.2417	-8.3483	0.422786	5.15	-8.46742	-0.269141	5.06835	-8.52	-0.952599	4.9313	-8.4871	-1.59427	4.69143	-8.35858	-2.17456
Malaclemys_terrapin	3.19	0.509	2.87	-3.94	2.66	-2.25	-3.29	1.41	-2.47	2.9	-1.24	1.85	-2.83	0.976	1.55	-0.158	-0.677	3.31	0.519	2.44	-2.53	3.22	0.898	-0.544	-1.81	-0.329	2.26	1.77	1.35	-2	3.24	0.518	2.81	3.41603	0.563803	2.51397	3.65703	0.597266	2.26015	3.82403	0.640508	1.95492	3.94897	0.693833	1.63756	4.02785	0.816263	1.32076	4.02085
Kinosternon_baurii	5.5	0.927	1.82	-3.63	0.492	-1.91	-2.66	-0.15	-1.77	5.09	-0.192	1.36	-1.17	-0.972	1.44	2.25	-0.723	2.91	0.472	0.212	-3.05	4.06	0.346	-1.87	0.719	-1.45	2.24	2.45	-0.176	-2.6	5.51	0.938	1.77	5.6273	0.976487	1.44783	5.7397	0.98106	1.1212	5.81471	0.942229	0.785789	5.8381	0.877902	0.449227	5.81961	0.794646	0.114094	5.74058
Emydoidea_blandingii	-3.25	4.29	-3.9	2.68	-3.25	5.65	2.28	-3.38	4.67	-3.19	3.62	-4.33	3.33	-0.29	-0.0442	1.48	1.63	-3.41	-2.79	-1.44	2.32	-4.73	0.0849	-0.635	2.28	0.34	-2.36	-3.88	-1.1	0.185	-3.32	4.27	-3.87	-3.72793	4.12089	-3.68089	-4.14207	4.00448	-3.46345	-4.49889	3.83407	-3.20407	-4.82096	3.54484	-2.99323	-5.11024	3.23976	-2.75381	-5.35184
Eretmochelys_imbricata	-19.5	0.301	-57.9	17	-1.31	-57	10.2	2.86	-54.4	-17.6	7.01	-53.8	5.2	-2.01	-45.7	-13.4	1.12	-46.4	6.98	8.64	-62.9	-12.1	11.5	-62.2	-3.7	-2.08	-42.2	-2.19	12.6	-64.4	-19.5	0.431	-58.1	-19.7	1.65668	-59.187	-19.8	3.17943	-59.7	-19.1	4.52954	-59.9595	-17.9754	5.73703	-60.1	-16.877	6.65069	-60.923	-16.0103
Geochelone_elegans	-1.17	4.14	-1.81	0.592	-1.9	2.84	0.417	-1.5	2.12	-1.12	2.8	-2.85	2.18	0.195	1.29	1.06	2.89	-2.46	-1.83	-0.398	2.39	-2.72	2.31	-1.57	2.24	1.13	-1.06	-3.03	0.401	0.0663	-1.21	4.13	-1.8	-1.50142	4.07286	-1.87714	-1.78187	3.97813	-1.94	-2.01845	3.80078	-1.98	-2.30118	3.71941	-2.02	-2.5044	3.53187	-2.02626	-2.74933
Chelonia_mydas	34.5	-7.45	-113	31.9	31.6	-211	38.6	27	-191	44.3	7.28	-115	61.5	6.62	-183	66.7	-5.64	-142	18.3	45.7	-170	22.8	34.5	-126	69.5	-2.9	-163	16.5	45.3	-146	34.1	-7.04	-113	32.2881	-3.96273	-111.441	30.9	-0.734645	-110	30.3	3.69951	-110	29.5021	6.66353	-110	27.321	9.82484	-111	24.8684
Actinemys_marmorata	4.84	1.11	2.6	-3.63	1.88	-2.31	-2.97	1.14	-2.07	4.84	-0.266	2.28	-1.71	0.305	2.3	1.25	-0.214	3.77	1.43	1.42	-3.18	4.33	0.862	-1.44	-0.148	-0.411	3.4	3.14	0.777	-2.58	4.89	1.13	2.54	5.07414	1.15604	2.19982	5.31574	1.23	1.89995	5.47	1.20756	1.55511	5.59254	1.20254	1.21239	5.7	1.19688	0.839533	5.74
Terrapene_carolina	3.56	0.996	3.33	-3.67	0.26	-4.23	-3.09	0.249	-3.47	3.51	0.398	3.16	-2.98	-0.894	0.813	-0.161	-1.15	3.41	1.68	-0.118	-3.39	3.84	-0.316	-0.614	-1.41	-1.6	2.37	3.08	-0.719	-1.92	3.62	0.996	3.3	3.95025	1.05504	3.07992	4.31481	1.04104	2.94519	4.5861	0.918296	2.6739	4.84741	0.852865	2.3691	5.0678	0.77466	2.02908	5.22486
Testudo_graeca	4.7	4.98	-2.1	-6.73	-3.46	5.68	-4.83	-2.72	4.32	4.63	1.85	-3.43	0.876	-2.31	6.36	6.23	0.659	1.3	-6.31	0.921	-0.395	-0.032	3.48	-4.79	3.89	-2.07	3.75	-3.84	1.41	-3.59	4.6	4.93	-2.13	4.29871	5.10477	-2.70258	3.96604	5.2	-3.25396	3.52714	5.19	-3.748	3.08876	5.11	-4.17478	2.64229	5.0578	-4.67551	2.07766
Hydromedusa_tectifera	-7.46	0.882	2.33	8.9	2.28	-3.05	5.82	1.11	-2.59	-6.53	-0.642	0.975	1.73	4.4	-4.56	-3.46	3.54	-3.36	4.73	-0.539	2.6	-0.0113	-1.55	3.71	-1.09	3.63	-4.93	2.18	-1.86	3.29	-7.45	0.819	2.39	-7.31398	0.390952	2.80805	-7.10936	0.0141936	3.24596	-6.75906	-0.294916	3.64141	-6.37281	-0.603229	3.98544	-5.89378	-0.913496	4.20311	-5.37565
Orlitia_borneensis	-11	5.98	-3.18	15.3	-3.03	6.99	11.8	-4.74	3.51	-10.1	1.02	-5.73	10.7	1.32	-2.22	-2.59	4.18	-8.14	4.46	-4.68	7.68	-8.82	-1.89	2.35	4.41	1.23	-7.16	-2.15	-5.6	4.54	-11.1	5.87	-3.03	-11.131	5.23276	-2.25966	-11.4	4.54166	-1.5586	-11.7416	3.82843	-0.976048	-12	3.0608	-0.497025	-12.3	2.21615	-0.00951362	-12.2
Cuora_amboinensis	-4.37	4.95	-3.96	7.39	-2.67	7.79	6.34	-4.66	5.71	-5.24	1.14	-6.09	5.94	-1.09	-1.03	1.08	1.71	-5.75	-1.26	-3.01	5.2	-5.78	-0.0492	0.0701	3.78	-0.735	-3.61	-3.43	-2.66	2.73	-4.47	4.9	-3.89	-5.00727	4.73636	-3.52091	-5.5152	4.45485	-3.17987	-5.9812	4.0788	-2.86904	-6.40156	3.68844	-2.51822	-6.7503	3.33364	-2.06546	-6.97766
Notochelys_platynota	8.88	5.91	-4.75	-11.4	-5.25	8.15	-8.14	-7.05	3.98	8.55	0.674	-7.14	1.33	-4.94	6.69	7.67	-3.09	1.21	-7.38	0.555	-2.53	-0.785	2.24	-7.69	5.72	-4.11	3.51	-3.56	1.41	-5.83	8.81	5.94	-4.8	8.0523	6.19885	-5.37712	7.45433	6.26	-6.20701	6.91204	6.27228	-6.99	6.1	6.36	-7.25333	5.347	6.46	-7.7916	4.88058
Cyclemys_dentata	-4.79	0.512	6.23	3.49	4.75	-8.72	2.36	2.95	-7.31	-4.85	-1.62	5.54	-4.79	2.7	-5.08	-7.33	0.0907	-0.299	4.99	0.655	-0.479	1.53	-1.63	3.77	-6.5	1.29	-3.93	3.97	-1.13	1.55	-4.71	0.487	6.25	-4.15342	0.293969	6.47658	-3.62796	0.100233	6.94204	-3.0051	-0.058066	7.01007	-2.40165	-0.39973	7.16278	-1.73718	-0.675891	7.28809	-1.03568
Batagur_dhongoka	1.19	5.44	-9.08	-0.814	-0.838	8.63	-0.269	-3.39	4.42	1.34	2.45	-10.4	4.98	-0.65	2.35	5.05	2.42	-6.79	-4.86	-0.304	1.13	-3.36	2.4	-7.63	4.76	-0.856	-2.67	-4.18	-0.486	-3.6	1.07	5.41	-9.12	0.419933	5.26299	-9.27525	-0.229772	5.07631	-9.38342	-0.874921	4.85361	-9.43	-1.49882	4.57559	-9.39712	-2.088	4.2512	-9.2756	-2.63313
Vijayachelys_silvatica	-2.96	3.43	-1.29	5.47	-3.29	3	3.72	-3.25	1.34	-2.96	1.29	-2.93	3.68	0.417	-1.35	0.919	1.8	-3.4	-0.729	-2.32	2.26	-3.13	-0.833	0.291	2.2	0.78	-2.84	-2.18	-1.91	1.14	-3.05	3.42	-1.26	-3.43264	3.24488	-1.17248	-3.73275	2.93633	-1.11454	-3.92078	2.54383	-1.1	-4.18134	2.19731	-1.06289	-4.33432	1.82946	-0.970218	-4.48234
Melanochelys_trijuga	-1.71	7.04	-4.21	1.89	-4.57	7.34	1.64	-5.27	4.8	-1.55	4.84	-5.6	4.96	-0.643	1.35	3.43	3.83	-3.82	-3.77	-2.27	2.47	-5.07	2.12	-2.73	4.49	0.34	-1.35	-4.31	-1.31	-0.343	-1.8	7.04	-4.22	-2.37392	6.79804	-4.23799	-2.89652	6.46956	-4.28	-3.45422	6.22289	-4.38711	-3.89907	5.81093	-4.43	-4.36277	5.40945	-4.33389	-4.86482
Caretta_caretta	-16.1	4.88	-96.1	17.7	-17	-87.3	11.3	-17.7	-96.3	-14.9	-3.05	-106	12.5	-4.73	-101	-1.19	3.57	-108	-0.236	-20.3	-88	-15.2	-14.1	-93.6	6.14	1.18	-106	-9.93	-18.5	-90.5	-16.3	4.63	-96	-17.2904	3.51792	-95.5548	-18.0971	2.23432	-95.3014	-18.8668	0.907127	-95.3668	-19.2	-0.548535	-95.4368	-19.3	-1.9302	-94.8408	-19.1
Dogania_subplana	4.27	1.51	1.27	-13.2	0.0365	0.154	-8.26	-0.32	-0.19	5.25	-0.226	-0.702	-5.48	-3.76	4.94	0.244	-3.89	4.87	-5.39	5.13	-3.69	-0.151	5.17	-3.91	-2.77	-4.24	5.19	-2.86	5.3	-4.06	4.25	1.64	1.16	4.0826	2.11376	0.708462	3.94355	2.67225	0.355942	3.71328	3.15914	-0.0498779	3.40189	3.58679	-0.471265	3.03131	3.95982	-0.897786	2.63548
Heosemys_spinosa	-2.63	-2.97	6.95	3.25	4.86	-6.86	2.96	5.88	-4.94	-2.59	-0.938	8.25	6.05	1.57	0.543	3.33	-0.133	6.96	-4.5	4.29	-2.76	-6.41	1.94	4.45	6.21	1.67	3.51	-5.75	4.48	-0.204	-2.69	-2.95	6.92	-3.30833	-2.7431	6.7769	-4.0223	-2.58885	6.95	-4.6705	-2.26158	6.94842	-5.31014	-2.02973	6.98945	-5.72269	-1.64785	6.71054	-6.30235
Chelus_fimbriata	-1.49	7.49	-5.91	1.16	-5.15	9.38	0.746	-5.06	6.02	-1.66	3.19	-9.53	5.78	-1.12	1.97	4.7	2.11	-3.09	-5.56	-2.02	3.2	-6.26	1.28	-1.89	5.4	-0.935	-0.872	-5.85	-1.75	0.427	-1.58	7.43	-5.93	-2.23436	7.01969	-5.81344	-3.01701	6.89525	-5.82525	-3.77079	6.95461	-5.66651	-4.18148	6.61272	-5.45	-4.65797	5.99553	-5.5035	-5.30915
Macrochelys_temminckii	-2.83	-7.61	-69.4	38.6	6.55	-93	27.2	12.7	-85.2	-2.63	9.22	-67.5	27.8	5.84	-65.8	16.5	6.75	-59.4	9.23	12	-93	-1.8	10.5	-85	21.9	7.29	-61.5	3.6	12.6	-88.1	-3.35	-7.11	-69.8	-4.78459	-5.53489	-70.9041	-6.35454	-4.21316	-72.0974	-8.2001	-3.643	-73.494	-9.69055	-2.22674	-74.2162	-10.6842	-0.359918	-75.2842	-11.4423
Malacochersus_tornieri	5.38	1.9	0.627	-6.96	-0.279	0.394	-5.86	-0.313	0.349	5.93	0.478	-0.58	-2.46	-1.95	3.72	3.91	-1.5	2.8	-3.32	2.91	-2.54	3	2.77	-2.75	0.497	-2.46	3.32	-0.35	2.57	-3.44	5.38	1.94	0.548	5.399	2.25599	0.132616	5.44225	2.51	-0.320815	5.47869	2.58	-0.835014	5.41806	2.69194	-1.3418	5.28089	2.88548	-1.81096	5.04554
Malayemys_subtrijuga	4	-1.52	2.57	-4.83	1.36	-2.84	-3.78	-0.261	-3.13	3.46	-3.43	0.708	-3.24	-1.78	0.691	0.182	-3.41	2.69	0.0897	1.13	-3.38	3.78	-0.594	-1.84	-1.68	-3.43	1.8	2.33	-0.0281	-3.15	4.05	-1.49	2.52	4.27708	-1.36858	2.20151	4.55297	-1.3	1.89244	4.78003	-1.32	1.53995	4.93266	-1.32	1.14874	5.04715	-1.29643	0.746699	5.12287
Indotestudo_elongata	-11.4	-1.15	11	10.3	0.0187	-9.76	6.19	-1.29	-6.18	-10.6	-4.83	8.21	-2.69	0.869	-8.47	-11.6	-1.25	1.99	7.51	-3.54	2.84	-3.5	-5.12	10.3	-6.71	-0.684	-4.55	3.4	-4.91	5.97	-11.3	-1.13	11.1	-10.5165	-1.33339	11.4835	-10.1689	-2.07488	11.9	-9.41899	-2.67501	12.23	-8.7091	-3.39972	12.5	-7.97257	-4.15772	12.6971	-7.00637
Pangshura_tentoria	5.03	5.35	-5.78	-6.81	-2.14	10.9	-5.63	-3.78	8.05	5.46	2.2	-7.56	2.9	-3.05	7.39	8.02	0.541	-1.98	-8.09	-0.251	0.88	-0.945	2.74	-7.23	5.22	-3.13	2.65	-5.09	-0.409	-3.54	4.94	5.36	-5.85	4.28277	5.38	-6.31633	3.66212	5.35801	-6.83192	2.99404	5.19846	-7.24442	2.31415	4.98924	-7.62434	1.61681	4.69491	-7.89905	0.911034
Morenia_petersi	-2.29	5.98	-3.49	3.83	-4.18	6.99	3.32	-4.28	4.83	-2.16	3.22	-4.49	5.69	-0.953	1.55	2.53	3.16	-3.63	-1.48	-2.06	4.19	-4.35	1.17	-0.876	4.57	0.0796	-1.44	-2.95	-1.77	1.42	-2.33	5.97	-3.48	-2.81819	5.74727	-3.4	-3.301	5.50383	-3.44967	-3.71596	5.15404	-3.36161	-4.02204	4.7366	-3.1866	-4.08535	4.35441	-2.83221	-4.41714
Geoemyda_spengleri	-3.93	2.9	-0.101	4.19	0.558	1.5	3.4	-0.423	0.865	-4.17	0.994	-0.831	1.53	2.09	-1.85	-1.67	2	-2.68	-0.0812	0.133	3.19	-3.02	0.325	1.92	-0.0506	1.74	-2.79	-1.65	-0.259	2.76	-3.94	2.89	-0.0673	-3.94	2.6307	0.173085	-4.09477	2.43569	0.414989	-4.12	2.23123	0.71235	-4.23262	2.04738	0.997132	-4.18213	1.84936	1.27276	-4.27926
Manouria_impressa	12.2	2.63	1.89	-13.5	-0.669	-1.16	-9.85	-3.55	-1.98	13.1	-2.95	-0.263	-4.42	-3.68	7.22	7.42	-4.34	7.03	-3.84	2.85	-7.59	8.23	1.54	-7.18	0.77	-5.8	7.41	1.62	1.33	-9.23	12.2	2.66	1.82	12.2739	2.76478	0.667798	12.9224	2.85447	-0.383491	13.6534	3.10069	-1.3181	13.4	3.25172	-2.23655	13.1	3.15729	-3.19744	13.2
Platemys_platycephala	-2.75	5.05	-3.16	6.73	-3.91	4.58	5.56	-3.76	2.91	-2.88	3.39	-4.27	5.96	0.869	-0.733	2.95	3	-3.55	0.253	-1.99	3.56	-3.13	0.815	-0.0319	4.9	1.86	-2.49	-1.86	-1.47	2.03	-2.82	5.02	-3.12	-3.22077	4.79948	-2.88948	-3.581	4.5692	-2.589	-3.88609	4.26934	-2.29238	-4.12671	3.90994	-1.99994	-4.32496	3.53843	-1.69008	-4.43691
Trachemys_scripta	3.38	5.52	-8.67	-1.72	-2.4	9.59	-1.55	-4.1	6.65	3.15	1.88	-10.1	4.91	-0.807	4.33	7.48	1.95	-4.48	-5.48	0.352	1.91	-2.74	3.15	-7.13	6.55	-1.61	-0.445	-4.68	0.332	-3.35	3.32	5.52	-8.7	2.7331	5.55509	-9.08981	1.98647	5.45	-9.42456	1.31485	5.3401	-9.45	0.629934	5.15835	-9.79055	-0.179709	4.96364	-9.78773	-0.956572
Glyptemys_insculpta	-7.79	3.57	-1.88	9.04	-0.872	1.58	7.01	-1.97	0.425	-8.19	1	-3.38	2.95	1.61	-5.17	-3.14	2.14	-6.51	0.571	-2.25	3.88	-5.87	-1.93	1.86	0.0523	1.93	-6.19	-2.93	-2.59	3.07	-7.81	3.52	-1.82	-8.04194	3.09408	-1.34612	-8.36546	2.70681	-0.841246	-8.67696	2.26152	-0.39834	-8.97902	1.80229	0.0587081	-9.151	1.3535	0.583498	-9.108
Chrysemys_picta	1.93	-2.04	6.06	-1.44	5.28	-4.27	-1.64	3.75	-4.51	1.84	-4.24	4.81	-4.31	1.47	-0.163	-2.44	-1.98	3.98	3.35	2.37	-2.22	4.37	-0.979	2.34	-3.99	-0.854	1.45	4.51	0.0771	-0.758	1.99	-2.04	6.05	2.4656	-2.02	5.92813	2.90486	-2.02503	5.71006	3.33475	-1.98	5.47728	3.75466	-1.98	5.22356	4.15431	-1.96	4.93569	4.48722
Proganochelys_quenstedti	-22	7.79	20.5	27.5	23.3	-0.383	26.4	7.99	-12.7	-24	-8.39	9.88	2.83	23.8	-18.9	-25	11.5	-0.757	26.9	-2.27	19.1	-11.7	-7.01	26.1	-11.9	19.1	-16.9	12.6	-9.72	22.5	-21.5	6.92	21.5	-21.2	3.73797	22.388	-22.5485	1.6688	24.2	-22	-0.802056	25.1588	-21.0696	-3.09733	26.7	-20.1	-5.41593	28.9815	-17.7059
Proterochersis_robusta	-1.83	9.43	-72.5	-1.12	6.69	-36.3	-0.968	-2.59	-40.3	-1.36	0.813	-72.4	11.7	0.992	-51.3	9.4	2.4	-64.1	-13.4	0.309	-51.7	-12.8	1.12	-63.7	10.9	-1.09	-56.6	-13.6	-2.03	-57	-1.93	9.41	-72.5	-3.31069	8.70599	-72.4	-4.89842	8.39039	-72.5	-6.39052	8.19895	-72.4	-7.72925	7.6705	-71.9	-9.17055	7.03315	-71.9	-10.327
Plesiochelys_bigleri	171	21.4	-21.5	-257	-12.9	24.9	-198	-32.3	-22.2	160	-11	-91.6	-117	-140	58	137	-109	9.29	-144	120	-77.1	113	115	-110	44.6	-161	22.9	2.34	134	-119	172	23.9	-23.7	172.134	40.975	-34.3607	180	57.9307	-42.1327	175.627	75.5963	-48.8722	168.684	90.9839	-59.8313	161.343	104.657	-72.9544	147.576
[truncated: 746 more columns]

## Sheet: SET2_resampled
	V1	V2	V3	V4	V5	V6	V7	V8	V9	V10	V11	V12	V13	V14	V15	V16	V17	V18	V19	V20	V21	V22	V23	V24	V25	V26	V27	V28	V29	V30	V31	V32	V33	V34	V35	V36	V37	V38	V39	V40	V41	V42	V43	V44	V45	V46	V47	V48	V49
Dermatemys_mawi	-0.353	-2.16	11.4	-0.478	3.16	-12.3	0.0012	-2.08	11.4	0.824989	-2.2522	11.1675	1.62238	-2.52815	10.9398	2.38802	-2.82009	10.6332	3.14899	-3.06732	10.288	3.89849	-3.15952	9.8491	4.60868	-3.15248	9.34035	5.27341	-3.06725	8.77788	5.87421	-2.94338	8.1547	6.39399	-2.82842	7.46284	6.83111	-2.74315	6.71238	7.19283	-2.6861	5.91931	7.48467	-2.64543	5.0959	7.70628	-2.60439	4.25049	7.87823
Staurotypus_triporcatus	-8.66	3	-2.78	9.85	-0.297	5.46	-8.72	2.96	-2.7	-9.03043	2.62928	-2.11885	-9.28421	2.24159	-1.54738	-9.48986	1.76028	-1.03024	-9.62	1.16767	-0.624484	-9.5665	0.577384	-0.192335	-9.38723	0.150116	0.38038	-9.14244	-0.217028	0.970102	-8.80635	-0.634379	1.47711	-8.38767	-0.984674	1.97233	-7.91555	-1.21482	2.48951	-7.38489	-1.39837	2.96898	-6.8319	-1.56143	3.43048	-6.2565	-1.7027	3.8708	-5.66459
Claudius_angustatus	4.86	0.805	1.63	-4.02	2.21	-1.24	4.87	0.809	1.58	4.92949	0.825899	1.25253	4.97146	0.797666	0.921767	4.99	0.717995	0.592892	4.90677	0.63516	0.277801	4.7882	0.60409	-0.0362438	4.65024	0.625439	-0.344926	4.50268	0.658331	-0.647449	4.3195	0.699625	-0.928798	4.13635	0.740517	-1.21153	3.91643	0.789554	-1.46357	3.68213	0.854361	-1.69787	3.43938	0.913092	-1.92546	3.16626	0.904477	-2.12149	2.86163
Sacalia_quadriocellata	2.82	-0.771	1.6	-3.25	1.37	-2.19	2.87	-0.767	1.56	3.05095	-0.764905	1.32905	3.19275	-0.762275	1.07176	3.30081	-0.755797	0.797807	3.37266	-0.727937	0.516117	3.42	-0.674622	0.239506	3.43706	-0.613705	-0.0483235	3.41186	-0.548354	-0.334142	3.3809	-0.466887	-0.6158	3.31994	-0.36482	-0.885411	3.22713	-0.243038	-1.13573	3.12526	-0.11516	-1.37949	2.99983	0.00763465	-1.61521	2.85077	0.128483	-1.83904	2.69964
Mauremys_reevesii	-5.4	3.07	0.0947	6.61	2.32	1.8	-5.41	3	0.189	-5.45849	2.73056	0.549817	-5.48	2.45131	0.906299	-5.54	2.20438	1.2758	-5.53312	1.95936	1.6544	-5.43556	1.70556	2.00555	-5.28972	1.46972	2.34535	-5.07519	1.23639	2.66361	-4.79473	0.996734	2.92316	-4.47263	0.796894	3.15895	-4.14305	0.631525	3.41848	-3.74603	0.485608	3.57698	-3.32796	0.383592	3.72068	-2.92582	0.352	3.91894	-2.48934
Apalone_mutica	3.69	3.78	-4.26	-1.98	-1.87	5.24	3.62	3.8	-4.27	3.117	3.83	-4.329	2.61654	3.81776	-4.41224	2.13421	3.69903	-4.51	1.63651	3.6173	-4.55	1.1422	3.51073	-4.52037	0.663902	3.35304	-4.48	0.201052	3.29854	-4.53	0.0375408	3.70205	-4.4824	-0.100444	3.64956	-4.60492	-0.230949	3.16452	-4.51397	0.0382758	3.25333	-4.48598	-0.352886	3.0913	-4.50456	-0.791208	2.87845	-4.35807	-1.20713
Pelusios_situatus	-14.3	3.55	-5.17	16.7	-2.44	5.05	-14.4	3.44	-5.02	-15.0785	2.82368	-4.16014	-15.4	2.10692	-3.20647	-15.7	1.34459	-2.29247	-15.9	0.518018	-1.40002	-15.8052	-0.421344	-0.590981	-15.6868	-1.28717	0.143984	-15.2993	-2.14104	0.957066	-14.6785	-2.87073	1.71073	-14.1576	-3.67509	2.49086	-13.4963	-4.50484	3.18409	-12.7398	-5.22813	3.88113	-11.7847	-5.76074	4.46535	-10.8548	-6.26808	5.14894	-9.84632
Elseya_novaeguineae	-5.68	4.71	-2.78	6.36	-4.36	4.65	-5.81	4.61	-2.69	-6.17188	4.25406	-2.39723	-6.54641	3.91937	-2.09203	-6.80501	3.47748	-1.80623	-7.00124	3.0219	-1.48314	-7.11986	2.54151	-1.16096	-7.09202	2.07809	-0.801862	-7.07796	1.65166	-0.393085	-7.00663	1.22651	0.0126683	-6.89436	0.806421	0.413426	-6.79991	0.4111	0.842927	-6.58292	0.0356816	1.24392	-6.26874	-0.324736	1.59205	-5.94035	-0.686907	1.92624	-5.63867
Chelydra_serpentina	1.23	0.45	-12.2	0.877	-0.244	11.5	1.32	0.46	-12.2	2.36622	0.856733	-12.1	3.36774	1.37734	-12	4.4165	1.83354	-12.0471	5.41845	2.31845	-12.2	6.31672	2.98836	-12.0833	7.27708	3.34613	-11.7129	8.23446	3.58735	-11.2711	9.00489	3.96326	-10.7	9.73089	4.37324	-10.0382	10.3515	4.73061	-9.21332	10.8	5.13939	-8.28334	11.1	5.52568	-7.28486	11.2	5.82988	-6.20054	11.4
Carettochelys_insculpta	-12.1	-19.1	30.5	7.8	13.5	59.9	-12.1	-19	30.3	-11.8501	-17.9501	28.9003	-11.9	-16.6561	27.7561	-11.773	-15.373	26.8	-10.8177	-14.2177	26.1177	-9.85254	-12.9751	25.4751	-9.10908	-11.5558	24.8	-8.26831	-10.1139	24.3	-7.76816	-8.50604	23.8816	-7.73	-6.80805	23.5	-7.90097	-4.98175	23.5	-7.96967	-3.22705	23.8	-7.63227	-1.49293	24.1	-7.15215	0.185715	24.5	-6.72844
Emys_orbicularis	-4.08	3.08	0.289	6.5	0.805	1.08	-4.09	3.02	0.361	-4.14242	2.75546	0.668208	-4.18505	2.47968	0.967352	-4.21	2.18956	1.25363	-4.18208	1.85834	1.48375	-4.11355	1.53419	1.71936	-3.97072	1.23787	1.9557	-3.75342	0.973422	2.17658	-3.50753	0.724589	2.38685	-3.2346	0.504218	2.59405	-2.94413	0.275424	2.76235	-2.62975	0.0372192	2.8681	-2.28756	-0.163722	2.95874	-1.91157	-0.313479	3.01369	-1.54179
Pelomedusa_subrufa	-5.02	2.3	-0.583	5.4	-0.375	2.69	-5.03	2.26	-0.537	-5.24098	2.14935	-0.19944	-5.42519	1.99481	0.139857	-5.55393	1.81214	0.48473	-5.62	1.62444	0.849395	-5.61552	1.44209	1.22135	-5.55097	1.24194	1.5816	-5.38654	1.01238	1.88385	-5.23315	0.811778	2.2137	-5.0455	0.630215	2.53812	-4.80909	0.451478	2.83068	-4.49411	0.274467	3.03794	-4.20853	0.0764219	3.26688	-3.88507	-0.0918215	3.46794	-3.53311
Psammobates_tentorius	-0.19	3.96	-3.74	-0.21	-2.45	3.61	-0.227	3.96	-3.74	-0.513733	3.97	-3.67573	-0.854604	3.99728	-3.89544	-1.1934	3.8483	-4.07	-1.5244	3.7076	-4.0272	-1.86499	3.63167	-4.24249	-2.25067	3.53233	-4.33	-2.52237	3.33527	-4.21763	-2.86532	3.15575	-4.10681	-3.16218	2.91673	-3.94782	-3.36622	2.63511	-3.73756	-3.56994	2.35013	-3.5351	-3.74854	2.07218	-3.29291	-3.88	1.83951	-2.97963	-3.90574
Homopus_femoralis	-0.555	5.02	-2.47	1.44	-1.58	2.96	-0.599	5.01	-2.47	-0.891335	4.90621	-2.45621	-1.22255	4.84248	-2.51	-1.52584	4.68805	-2.54195	-1.81044	4.50978	-2.59	-2.07922	4.30539	-2.54	-2.36944	4.12042	-2.49014	-2.60998	3.90003	-2.39001	-2.79541	3.64918	-2.24459	-2.84	3.39924	-2.03308	-2.97547	3.15358	-1.83905	-3.0316	2.90521	-1.60521	-3.03278	2.66834	-1.35112	-2.97193	2.44966	-1.08966	-2.94
Kinixys_belliana	-0.783	4.93	-4.12	0.694	-3.42	5.01	-0.81	4.92	-4.14	-1.18164	4.93	-4.42082	-1.65933	4.93	-4.60983	-2.14028	4.81	-4.70514	-2.56783	4.58217	-4.74406	-2.90861	4.21139	-4.76241	-3.29644	3.93267	-4.95911	-3.68365	3.58781	-4.91927	-3.99588	3.23117	-4.74117	-4.22794	2.90309	-4.41309	-4.40944	2.53141	-4.09141	-4.52	2.14941	-3.74927	-4.49	1.79525	-3.37034	-4.47691	1.63618	-2.87854	-4.51
Rafetus_euphraticus	-5.35	-4.21	10.6	7.68	13.6	-11.3	-5.27	-4.25	10.6	-4.30879	-4.6517	10.9	-3.16404	-4.94228	10.9	-2.11069	-5.1531	10.7	-1.03104	-5.40061	10.547	0.0168459	-5.57	10.2	1.12136	-5.60836	9.91343	2.20489	-5.51093	9.45232	3.2693	-5.25195	9.00486	4.2888	-5.07902	8.43316	5.24496	-4.88223	7.76669	6.06958	-4.65261	6.96042	6.78207	-4.33196	6.08391	7.53353	-3.78539	5.36755	8.24645
Platysternon_megacephalum	3.89	0.568	-2.32	-5.28	-1.44	3.27	3.96	0.532	-2.25	4.23744	0.41353	-1.93505	4.54079	0.296016	-1.63921	4.8292	0.245448	-1.31264	5.10512	0.242493	-0.97689	5.37628	0.235186	-0.632762	5.54639	0.193845	-0.232502	5.52578	0.0502478	0.174027	5.38932	-0.0189462	0.579533	5.27567	-0.151756	0.977224	5.03838	-0.31302	1.30953	4.75742	-0.40831	1.63258	4.48058	-0.531357	1.94942	4.17538	-0.639655	2.24654	3.8427
Pelodiscus_sinensis	-0.793	-0.0735	3.81	2.16	5.27	-7.43	-0.705	-0.0953	3.88	-0.260746	-0.222414	4	0.182798	-0.356663	4.05657	0.65284	-0.450246	4.09786	1.12205	-0.545166	3.9951	1.58224	-0.626202	3.85011	2.02153	-0.700187	3.64915	2.43595	-0.736473	3.39053	2.79999	-0.722001	3.0625	3.13916	-0.683345	2.71084	3.46954	-0.647061	2.35061	3.7674	-0.598229	1.9668	4.04532	-0.514539	1.57535	4.38537	-0.363267	1.2578	4.69855
Stigmochelys_pardalis	0.174	8.17	-5.81	-0.81	-6.32	9.14	0.118	8.17	-5.86	-0.555472	8.12702	-6.3749	-1.36031	7.97981	-6.57006	-2.07023	7.70391	-6.94414	-2.67798	7.35401	-7.4	-3.26657	7.10718	-7.71282	-3.98155	6.70204	-7.94359	-4.71656	6.28172	-7.94724	-5.3388	5.7812	-7.65747	-5.28	5.4027	-7.05539	-5.43959	4.74821	-6.65301	-5.74683	4.11634	-6.16528	-5.99152	3.55087	-5.57935	-5.96911	2.96792	-4.95792	-6.05116
Dermochelys_coriacea	3.82	3.3	0.758	-7.68	1.37	2.7	3.82	3.31	0.669	3.83	3.36	0.257998	3.83407	3.37203	-0.151888	3.93	3.37178	-0.548227	3.78504	3.13672	-0.830626	3.52194	2.97	-1.08806	3.21969	3.01147	-1.36736	2.8834	3.01049	-1.60757	2.54865	2.93546	-1.83681	2.25028	2.76028	-2.05972	2.05091	2.49091	-2.29909	1.7481	2.29905	-2.50095	1.39456	2.14819	-2.65272	1.01116	2.09	-2.78687	0.602074
Chelonoidis_carbonaria	-2.06	3.99	-4.64	2.2	-3.67	6.41	-2.11	3.97	-4.64	-2.65189	3.88969	-4.68031	-3.15075	3.71444	-4.66963	-3.59451	3.46032	-4.50032	-3.99545	3.13682	-4.33227	-4.47138	2.87917	-4.29	-4.92321	2.5984	-4.1584	-5.24515	2.27314	-3.85485	-5.45609	1.85794	-3.58196	-5.75432	1.50705	-3.28705	-5.87	1.13403	-2.90323	-5.84773	0.753336	-2.52319	-5.734	0.425196	-2.226	-5.62306	0.0125743	-1.87919	-5.50662
Rhinoclemmys_annulata	2.79	0.00974	5.99	-4.5	1.91	-7.62	2.88	0.00989	6	3.51262	-0.0184152	5.9586	4.13599	-0.036503	5.84234	4.7216	-0.131641	5.6192	5.24571	-0.36895	5.36238	5.62672	-0.682951	5.00328	6.01793	-0.803497	4.51972	6.18637	-0.875183	3.91817	6.49432	-0.890864	3.36514	6.71015	-0.904672	2.76954	6.83334	-0.941674	2.14658	6.77	-0.813676	1.54841	6.62839	-0.492777	1.0233	6.34667	-0.306335	0.490894	6.23369
Emydura_macquarii	-0.0915	6.04	-4.32	0.387	-4.57	7.16	-0.179	6.04	-4.33	-0.759655	5.96549	-4.33	-1.33027	5.82589	-4.33	-1.88929	5.65828	-4.3	-2.41456	5.40597	-4.24649	-2.89872	5.0894	-4.15376	-3.35805	4.74195	-4.04639	-3.74548	4.33452	-3.88226	-4.09652	3.91348	-3.67878	-4.43041	3.52946	-3.38959	-4.72691	3.14745	-3.05745	-5.00292	2.7661	-2.7061	-5.2301	2.37979	-2.32732	-5.40369	1.98354	-1.93262	-5.58181
Astrochelys_radiata	5.37	1.2	0.538	-4.19	-0.13	-1.37	5.37	1.22	0.402	5.42092	1.29729	0.062909	5.59909	1.46455	-0.218103	5.66003	1.57992	-0.564931	5.52793	1.62896	-0.877443	5.56294	1.65411	-1.26351	5.49542	1.70729	-1.64561	5.33816	1.72796	-1.9998	5.06102	1.8098	-2.20817	4.87827	1.77304	-2.5526	4.59232	1.80282	-2.81205	4.2275	1.80438	-2.94562	3.86557	1.76	-3.08685	3.51209	1.78358	-3.25396	3.13282
Pyxis_arachnoides	-5.38	1.5	1.96	5.77	-0.223	-1.12	-5.39	1.46	2.01	-5.42118	1.22291	2.37354	-5.47756	0.805757	2.49732	-5.43998	0.413955	2.71004	-5.28	0.0545099	2.90376	-5.21357	-0.363689	3.05643	-5.03892	-0.757136	3.19405	-4.76527	-1.06978	3.36484	-4.39433	-1.26567	3.49853	-4.06775	-1.52135	3.6709	-3.66385	-1.68538	3.77769	-3.22596	-1.62599	3.79	-2.79884	-1.64423	3.69423	-2.3652	-1.75747	3.74	-1.94202
Phrynops_tuberosus	-2.18	-3.44	15.9	1.76	6.58	-16.8	-1.95	-3.5	15.9	-0.776193	-3.65219	16.2	0.458346	-3.67	16.4	1.69232	-3.67705	16.2432	2.8532	-3.74851	15.8	3.91244	-3.75	15.1813	4.92882	-3.75	14.4151	5.9802	-3.64245	13.7061	6.98937	-3.35354	13.0339	7.83849	-3.1343	12.1287	8.50135	-3.04239	11.0477	9.23165	-2.90179	10.0119	9.892	-2.75582	8.93545	10.48	-2.57799	7.82197	10.842
Podocnemis_vogli	3.22	12.6	5	-1.9	-15.1	-5.17	3.12	12.7	5.13	2.41186	12.7881	6.0134	1.53821	12.8	6.76884	0.586897	12.8	7.43451	-0.206866	12.4186	8.10514	-1.0097	11.8878	8.67219	-1.79488	11.2347	9.20182	-2.533	10.456	9.5976	-3.13291	9.50332	9.87189	-3.64763	8.47334	10.0069	-4.12529	7.45213	10.2	-4.59538	6.4277	10.4	-5.00876	5.34235	10.4	-5.40648	4.25122	10.4	-5.80243
Lissemys_punctata	-1.75	3.06	-2.64	5.01	-1.78	5.85	-1.79	3.05	-2.62	-2.18005	2.91399	-2.41798	-2.60886	2.82623	-2.27934	-3.04	2.77159	-2.15664	-3.14866	2.51925	-1.91209	-3.39202	2.29747	-1.59646	-3.55573	2.06712	-1.2314	-3.66418	1.81746	-0.858411	-3.7533	1.56675	-0.480799	-3.8	1.30284	-0.105166	-3.83511	1.00323	0.243259	-3.87	0.661645	0.551927	-3.87	0.306607	0.846506	-3.78962	-0.00844185	1.17268	-3.68857
Chelodina_oblonga	-5.07	7.54	-4.98	6.22	-2.73	7.58	-5.19	7.5	-4.89	-5.64189	7.19811	-4.52165	-6.05941	6.87379	-4.13059	-6.4266	6.52675	-3.71011	-6.64394	6.1301	-3.23615	-6.79018	5.70892	-2.75874	-6.86273	5.2836	-2.26813	-6.87846	4.88077	-1.74923	-6.78089	4.47536	-1.24625	-6.65556	4.12113	-0.708079	-6.45051	3.78103	-0.184642	-6.1994	3.43921	0.318211	-5.96455	3.07796	0.811875	-5.72808	2.69164	1.28932	-5.48853
Mesoclemmys_dahli	-5.14	0.523	5.94	6.53	5.34	-6.29	-5.07	0.469	5.99	-4.60666	0.147163	6.285	-4.11098	-0.140823	6.57314	-3.58023	-0.459091	6.73773	-3.01444	-0.755359	6.79	-2.42875	-1.00472	6.77	-1.81069	-1.15983	6.75339	-1.19497	-1.26154	6.61691	-0.60775	-1.36064	6.37808	-0.028853	-1.43145	6.1242	0.56503	-1.45638	5.88534	1.11745	-1.46	5.55953	1.6462	-1.41451	5.20028	2.19671	-1.35166	4.88081	2.7619
Chersina_angulata	1.95	-0.58	3.85	-1.57	3.41	-4.69	2	-0.577	3.82	2.34592	-0.685572	3.71204	2.68007	-0.825029	3.57996	2.94429	-0.954144	3.33571	3.19324	-1.06883	3.06794	3.44669	-1.13	2.78414	3.68915	-1.13695	2.48475	3.88927	-1.07382	2.16146	4.01756	-0.95305	1.81732	4.09575	-0.812774	1.4655	4.15	-0.659563	1.1157	4.12329	-0.500938	0.766498	4.04903	-0.333931	0.426316	4.01	-0.126543	0.101616	3.99244
Gopherus_polyphemus	-3.65	-0.928	6.87	3.85	0.977	-7.8	-3.62	-0.913	6.83	-3.00197	-1.10682	6.85561	-2.50481	-1.42139	7.20139	-2.02821	-1.74089	7.56854	-1.41042	-1.87319	7.49681	-0.845258	-2.20122	7.52092	-0.284697	-2.54317	7.70159	0.362995	-2.73029	7.68	0.86136	-2.82	7.3566	1.40443	-3.03407	7.10779	2.01036	-3.12434	6.80265	2.57097	-3.13	6.42886	2.91517	-3.08212	5.88059	3.44501	-2.975	5.46249	3.92063
Sternotherus_odoratus	-2.09	3.62	-2.23	2.73	-2.27	3.44	-2.14	3.6	-2.23	-2.43894	3.43737	-2.2	-2.69909	3.21818	-2.15	-2.93205	2.96726	-2.12	-3.1407	2.69395	-2.12	-3.28365	2.38722	-2.05635	-3.38084	2.08205	-1.92832	-3.46313	1.78905	-1.76531	-3.53797	1.49219	-1.60812	-3.57	1.1994	-1.4296	-3.54185	0.913576	-1.23925	-3.49991	0.625668	-1.06036	-3.43805	0.339956	-0.877044	-3.37837	0.0675194	-0.672802	-3.29943
Graptemys_geographica	-4.64	4.12	-4.68	5.88	-1.42	9.14	-4.73	4.09	-4.65	-5.28653	3.7226	-4.4013	-5.8011	3.24779	-4.27223	-6.40359	2.8976	-4.1488	-6.84323	2.47602	-3.78527	-7.27214	2.06755	-3.39725	-7.59928	1.649	-2.92729	-7.78566	1.19736	-2.41453	-7.91192	0.754881	-1.86944	-7.93171	0.282476	-1.33885	-7.85327	-0.172552	-0.79674	-7.67333	-0.601557	-0.257442	-7.47001	-0.95649	0.325483	-7.16707	-1.26341	0.893485	-6.87473
Clemmys_guttata	3.83	2.8	-1.14	-4.97	-0.79	2.43	3.81	2.81	-1.18	3.62654	2.86551	-1.50795	3.48432	2.84432	-1.86271	3.41121	2.8	-2.23514	3.225	2.76833	-2.56667	2.98718	2.72	-2.86282	2.71228	2.68076	-3.12772	2.38851	2.63	-3.3269	2.05925	2.59308	-3.51692	1.72744	2.47581	-3.65419	1.36081	2.41016	-3.74	0.985123	2.33752	-3.78248	0.616059	2.23019	-3.78	0.253249	2.10626	-3.74084	-0.0963113
Deirochelys_reticularia	1.87	5.34	-8.13	-1.27	-4.04	8.82	1.77	5.33	-8.17	1.10432	5.2417	-8.3483	0.422786	5.15	-8.46742	-0.269141	5.06835	-8.52	-0.952599	4.9313	-8.4871	-1.59427	4.69143	-8.35858	-2.17456	4.37635	-8.13908	-2.71409	4.03994	-7.85195	-3.21328	3.70098	-7.50148	-3.63355	3.32753	-7.08861	-3.95622	2.91529	-6.6268	-4.23834	2.56166	-6.095	-4.50032	2.2746	-5.51428	-4.75173	1.97231	-4.93654	-4.97243
Malaclemys_terrapin	3.19	0.509	2.87	-3.94	2.66	-2.25	3.24	0.518	2.81	3.41603	0.563803	2.51397	3.65703	0.597266	2.26015	3.82403	0.640508	1.95492	3.94897	0.693833	1.63756	4.02785	0.816263	1.32076	4.02085	0.918273	0.985825	4.0357	0.974696	0.643117	4.00632	1.03579	0.307372	3.8635	1.10433	-0.00578666	3.71409	1.17591	-0.310076	3.58924	1.25538	-0.62775	3.40481	1.33259	-0.912821	3.25065	1.40974	-1.21884	3.07587
Kinosternon_baurii	5.5	0.927	1.82	-3.63	0.492	-1.91	5.51	0.938	1.77	5.6273	0.976487	1.44783	5.7397	0.98106	1.1212	5.81471	0.942229	0.785789	5.8381	0.877902	0.449227	5.81961	0.794646	0.114094	5.74058	0.74629	-0.220211	5.58536	0.75375	-0.529645	5.42272	0.796183	-0.833641	5.2167	0.827711	-1.10948	4.97509	0.843936	-1.35618	4.71304	0.845576	-1.58484	4.43388	0.829876	-1.79074	4.15127	0.789228	-1.98899	3.87108
Emydoidea_blandingii	-3.25	4.29	-3.9	2.68	-3.25	5.65	-3.32	4.27	-3.87	-3.72793	4.12089	-3.68089	-4.14207	4.00448	-3.46345	-4.49889	3.83407	-3.20407	-4.82096	3.54484	-2.99323	-5.11024	3.23976	-2.75381	-5.35184	2.9127	-2.4927	-5.54	2.57971	-2.19981	-5.64437	2.24407	-1.87407	-5.69	1.88949	-1.54949	-5.67139	1.52976	-1.22837	-5.55667	1.17836	-0.916856	-5.44438	0.814074	-0.618885	-5.31771	0.486344	-0.287886	-5.09127
Eretmochelys_imbricata	-19.5	0.301	-57.9	17	-1.31	-57	-19.5	0.431	-58.1	-19.7	1.65668	-59.187	-19.8	3.17943	-59.7	-19.1	4.52954	-59.9595	-17.9754	5.73703	-60.1	-16.877	6.65069	-60.923	-16.0103	7.84448	-61.7897	-15.1887	9.09702	-62.5	-14.2263	10.2737	-63.1737	-13.1143	11.2928	-63.7928	-11.9414	12.2293	-64.4293	-10.5063	12.8	-65.0937	-9.05145	13.2	-65.8	-7.53508	13.4	-66.2277	-6.05697
Geochelone_elegans	-1.17	4.14	-1.81	0.592	-1.9	2.84	-1.21	4.13	-1.8	-1.50142	4.07286	-1.87714	-1.78187	3.97813	-1.94	-2.01845	3.80078	-1.98	-2.30118	3.71941	-2.02	-2.5044	3.53187	-2.02626	-2.74933	3.34756	-2.04689	-2.9436	3.1364	-1.95093	-3.15312	2.92688	-1.86229	-3.31181	2.69639	-1.73819	-3.41876	2.45249	-1.57687	-3.48834	2.22752	-1.38752	-3.51863	2.00687	-1.17687	-3.55212	1.77728	-0.966613	-3.54443
Chelonia_mydas	34.5	-7.45	-113	31.9	31.6	-211	34.1	-7.04	-113	32.2881	-3.96273	-111.441	30.9	-0.734645	-110	30.3	3.69951	-110	29.5021	6.66353	-110	27.321	9.82484	-111	24.8684	12.8071	-112	23.2815	16.4554	-113	21.9452	20.2417	-114	20.7017	24.2948	-114.491	19.8	28.4149	-115	19.1963	31.5642	-117	18.7595	34.6027	-119	18.6	37.4279	-121.57	18.0594
Actinemys_marmorata	4.84	1.11	2.6	-3.63	1.88	-2.31	4.89	1.13	2.54	5.07414	1.15604	2.19982	5.31574	1.23	1.89995	5.47	1.20756	1.55511	5.59254	1.20254	1.21239	5.7	1.19688	0.839533	5.74	1.19278	0.455719	5.65411	1.25	0.0823644	5.55087	1.27913	-0.290476	5.43529	1.26764	-0.66554	5.22548	1.25	-0.99627	5.00971	1.25014	-1.32058	4.7941	1.28	-1.64508	4.53696	1.28217	-1.94304	4.26814
Terrapene_carolina	3.56	0.996	3.33	-3.67	0.26	-4.23	3.62	0.996	3.3	3.95025	1.05504	3.07992	4.31481	1.04104	2.94519	4.5861	0.918296	2.6739	4.84741	0.852865	2.3691	5.0678	0.77466	2.02908	5.22486	0.707884	1.65541	5.23768	0.697536	1.24841	5.20854	0.674102	0.837525	5.17994	0.619947	0.428372	5.10383	0.522064	0.0371108	4.97581	0.435841	-0.3466	4.81205	0.360615	-0.719044	4.60971	0.281873	-1.07041	4.38156
Testudo_graeca	4.7	4.98	-2.1	-6.73	-3.46	5.68	4.6	4.93	-2.13	4.29871	5.10477	-2.70258	3.96604	5.2	-3.25396	3.52714	5.19	-3.748	3.08876	5.11	-4.17478	2.64229	5.0578	-4.67551	2.07766	4.97	-5.02706	1.43259	4.82086	-5.14	0.871472	4.54523	-5.18216	0.23302	4.36926	-5.3	-0.402665	4.14237	-5.25619	-1.00137	3.88519	-5.08259	-1.58179	3.56218	-4.97205	-2.00745	3.10255	-4.73109	-2.49385
Hydromedusa_tectifera	-7.46	0.882	2.33	8.9	2.28	-3.05	-7.45	0.819	2.39	-7.31398	0.390952	2.80805	-7.10936	0.0141936	3.24596	-6.75906	-0.294916	3.64141	-6.37281	-0.603229	3.98544	-5.89378	-0.913496	4.20311	-5.37565	-1.18718	4.38288	-4.85614	-1.43395	4.59193	-4.33188	-1.65604	4.81604	-3.76132	-1.83067	4.95533	-3.15946	-1.91405	5.00595	-2.55146	-1.97	4.95629	-1.95077	-2.04981	4.8851	-1.34546	-2.09	4.81943	-0.738499
Orlitia_borneensis	-11	5.98	-3.18	15.3	-3.03	6.99	-11.1	5.87	-3.03	-11.131	5.23276	-2.25966	-11.4	4.54166	-1.5586	-11.7416	3.82843	-0.976048	-12	3.0608	-0.497025	-12.3	2.21615	-0.00951362	-12.2	1.38145	0.597355	-12	0.66165	1.28441	-11.5111	0.0709521	1.85662	-11.1338	-0.577819	2.54942	-10.5457	-1.21569	3.14256	-9.85506	-1.82494	3.63095	-9.10293	-2.38499	4.08582	-8.26938	-2.8519	4.5419	-7.42686
Cuora_amboinensis	-4.37	4.95	-3.96	7.39	-2.67	7.79	-4.47	4.9	-3.89	-5.00727	4.73636	-3.52091	-5.5152	4.45485	-3.17987	-5.9812	4.0788	-2.86904	-6.40156	3.68844	-2.51822	-6.7503	3.33364	-2.06546	-6.97766	2.92213	-1.58703	-7.04	2.46155	-1.10155	-7.06	2.01657	-0.595931	-7.04142	1.54137	-0.118225	-6.94671	1.07456	0.357659	-6.74026	0.632383	0.821571	-6.48029	0.227006	1.29347	-6.21054	-0.170101	1.76496	-5.89498
Notochelys_platynota	8.88	5.91	-4.75	-11.4	-5.25	8.15	8.81	5.94	-4.8	8.0523	6.19885	-5.37712	7.45433	6.26	-6.20701	6.91204	6.27228	-6.99	6.1	6.36	-7.25333	5.347	6.46	-7.7916	4.88058	6.47	-8.65965	3.91559	6.43093	-8.96093	2.96453	6.28487	-8.9653	2.10809	6.06582	-9.48709	1.11537	5.75179	-9.50119	0.237122	5.41073	-9.13	-0.690588	4.94443	-9.01666	-1.61045	4.54161	-8.71794	-2.45992
Cyclemys_dentata	-4.79	0.512	6.23	3.49	4.75	-8.72	-4.71	0.487	6.25	-4.15342	0.293969	6.47658	-3.62796	0.100233	6.94204	-3.0051	-0.058066	7.01007	-2.40165	-0.39973	7.16278	-1.73718	-0.675891	7.28809	-1.03568	-0.877755	7.28491	-0.545276	-1.02156	6.89	0.120222	-1.24812	6.71281	0.80079	-1.35	6.46579	1.42611	-1.43846	6.10926	2.00406	-1.53	5.67062	2.57564	-1.57391	5.2174	3.05838	-1.61129	4.68904	3.62732
Batagur_dhongoka	1.19	5.44	-9.08	-0.814	-0.838	8.63	1.07	5.41	-9.12	0.419933	5.26299	-9.27525	-0.229772	5.07631	-9.38342	-0.874921	4.85361	-9.43	-1.49882	4.57559	-9.39712	-2.088	4.2512	-9.2756	-2.63313	3.8968	-9.06344	-3.12734	3.52541	-8.77178	-3.56159	3.13841	-8.4115	-3.9483	2.7617	-7.99194	-4.31241	2.43466	-7.51345	-4.63542	2.19966	-6.95916	-4.91337	2.0093	-6.36326	-5.17057	1.81943	-5.75859	-5.41691
Vijayachelys_silvatica	-2.96	3.43	-1.29	5.47	-3.29	3	-3.05	3.42	-1.26	-3.43264	3.24488	-1.17248	-3.73275	2.93633	-1.11454	-3.92078	2.54383	-1.1	-4.18134	2.19731	-1.06289	-4.33432	1.82946	-0.970218	-4.48234	1.44828	-0.819842	-4.51795	1.07181	-0.602656	-4.43433	0.765028	-0.304793	-4.38216	0.504858	0.0372023	-4.25345	0.191625	0.313755	-4.05651	-0.109659	0.56061	-3.86645	-0.370143	0.856208	-3.6196	-0.5782	1.1504	-3.30386
Melanochelys_trijuga	-1.71	7.04	-4.21	1.89	-4.57	7.34	-1.8	7.04	-4.22	-2.37392	6.79804	-4.23799	-2.89652	6.46956	-4.28	-3.45422	6.22289	-4.38711	-3.89907	5.81093	-4.43	-4.36277	5.40945	-4.33389	-4.86482	5.09099	-4.1842	-5.27103	4.71056	-3.90476	-5.51135	4.2473	-3.56298	-5.69757	3.78094	-3.18851	-5.82564	3.29746	-2.81028	-5.93632	2.85946	-2.37841	-5.99	2.39748	-1.9607	-5.98	1.95739	-1.51529	-5.91431
Caretta_caretta	-16.1	4.88	-96.1	17.7	-17	-87.3	-16.3	4.63	-96	-17.2904	3.51792	-95.5548	-18.0971	2.23432	-95.3014	-18.8668	0.907127	-95.3668	-19.2	-0.548535	-95.4368	-19.3	-1.9302	-94.8408	-19.1	-3.21741	-94.0639	-19	-4.66331	-93.5247	-18.8	-6.11589	-93.0979	-18.5721	-7.58525	-92.8	-18.4	-9.08295	-92.6	-18.2	-10.5781	-92.374	-17.7945	-12.0165	-92.1945	-17.3542	-13.4375	-91.8542	-16.74
Dogania_subplana	4.27	1.51	1.27	-13.2	0.0365	0.154	4.25	1.64	1.16	4.0826	2.11376	0.708462	3.94355	2.67225	0.355942	3.71328	3.15914	-0.0498779	3.40189	3.58679	-0.471265	3.03131	3.95982	-0.897786	2.63548	4.26874	-1.3517	2.24236	4.5262	-1.83813	1.80667	4.67897	-2.33333	1.35917	4.89882	-2.79083	0.88558	5.17387	-3.18742	0.343642	5.39337	-3.52506	-0.257994	5.53096	-3.80192	-0.901336	5.63191	-3.98287	-1.55764
Heosemys_spinosa	-2.63	-2.97	6.95	3.25	4.86	-6.86	-2.69	-2.95	6.92	-3.30833	-2.7431	6.7769	-4.0223	-2.58885	6.95	-4.6705	-2.26158	6.94842	-5.31014	-2.02973	6.98945	-5.72269	-1.64785	6.71054	-6.30235	-1.19059	6.66588	-6.8058	-0.662254	6.4721	-7.0965	-0.191873	6.06975	-7.3427	0.303746	5.6473	-7.63108	0.81701	5.17731	-7.68412	1.32175	4.63118	-7.49017	1.73933	4.131	-7.6925	2.0825	3.495	-7.68169
Chelus_fimbriata	-1.49	7.49	-5.91	1.16	-5.15	9.38	-1.58	7.43	-5.93	-2.23436	7.01969	-5.81344	-3.01701	6.89525	-5.82525	-3.77079	6.95461	-5.66651	-4.18148	6.61272	-5.45	-4.65797	5.99553	-5.5035	-5.30915	5.61543	-5.51181	-5.99006	5.44	-5.21982	-6.14027	4.91906	-4.89987	-6.54968	4.26639	-4.73213	-7.01824	3.79176	-4.3196	-7.2	3.30857	-3.78786	-7.39009	2.77312	-3.24312	-7.61284	2.2672	-2.6772	-7.70717
Macrochelys_temminckii	-2.83	-7.61	-69.4	38.6	6.55	-93	-3.35	-7.11	-69.8	-4.78459	-5.53489	-70.9041	-6.35454	-4.21316	-72.0974	-8.2001	-3.643	-73.494	-9.69055	-2.22674	-74.2162	-10.6842	-0.359918	-75.2842	-11.4423	1.04185	-77.0268	-11.1844	2.42908	-78.8625	-10.7629	3.69155	-80.8483	-9.90215	4.50602	-82.9026	-8.63914	6.12065	-84.0006	-7.14184	7.2312	-85.4727	-5.42166	8.50275	-86.3262	-3.98369	10.0547	-87.3924	-2.18402
Malacochersus_tornieri	5.38	1.9	0.627	-6.96	-0.279	0.394	5.38	1.94	0.548	5.399	2.25599	0.132616	5.44225	2.51	-0.320815	5.47869	2.58	-0.835014	5.41806	2.69194	-1.3418	5.28089	2.88548	-1.81096	5.04554	3.04289	-2.25313	4.64379	3.11095	-2.5681	4.19089	2.95137	-2.39797	4.43405	3.07392	-2.60304	4.36571	3.09428	-2.68713	3.98693	3.13288	-2.98154	3.51782	3.21913	-3.18826	3.01103	3.26263	-3.3079	2.50196
Malayemys_subtrijuga	4	-1.52	2.57	-4.83	1.36	-2.84	4.05	-1.49	2.52	4.27708	-1.36858	2.20151	4.55297	-1.3	1.89244	4.78003	-1.32	1.53995	4.93266	-1.32	1.14874	5.04715	-1.29643	0.746699	5.12287	-1.24427	0.337927	5.17	-1.14261	-0.0676317	5.1038	-0.986594	-0.452084	4.93898	-0.849772	-0.812377	4.81318	-0.692405	-1.18046	4.70024	-0.449995	-1.50293	4.46586	-0.235928	-1.77725	4.19635	-0.0417479	-2.03365	3.95369
Indotestudo_elongata	-11.4	-1.15	11	10.3	0.0187	-9.76	-11.3	-1.13	11.1	-10.5165	-1.33339	11.4835	-10.1689	-2.07488	11.9	-9.41899	-2.67501	12.23	-8.7091	-3.39972	12.5	-7.97257	-4.15772	12.6971	-7.00637	-4.74983	12.7	-5.98266	-5.13347	12.6	-5.02377	-5.46649	12.3	-4.09067	-5.70351	11.8824	-3.15367	-5.82063	11.3937	-2.20225	-5.82602	10.9	-1.2546	-5.73851	10.3851	-0.346904	-5.63845	9.73073	0.521774
Pangshura_tentoria	5.03	5.35	-5.78	-6.81	-2.14	10.9	4.94	5.36	-5.85	4.28277	5.38	-6.31633	3.66212	5.35801	-6.83192	2.99404	5.19846	-7.24442	2.31415	4.98924	-7.62434	1.61681	4.69491	-7.89905	0.911034	4.34002	-8.05399	0.17777	4.01431	-8.08	-0.576217	3.75556	-7.99	-1.32302	3.57425	-7.76137	-1.98633	3.32184	-7.38306	-2.60266	3.0815	-6.923	-3.18603	2.87479	-6.41199	-3.7563	2.66185	-5.8837	-4.30438
Morenia_petersi	-2.29	5.98	-3.49	3.83	-4.18	6.99	-2.33	5.97	-3.48	-2.81819	5.74727	-3.4	-3.301	5.50383	-3.44967	-3.71596	5.15404	-3.36161	-4.02204	4.7366	-3.1866	-4.08535	4.35441	-2.83221	-4.41714	3.9781	-2.64286	-4.73398	3.59631	-2.40088	-4.93826	3.20871	-2.06871	-5.01	2.80653	-1.69653	-5.02909	2.42092	-1.30092	-5.00469	2.06816	-0.876668	-4.91558	1.7579	-0.427847	-4.80293	1.42114	-0.00380057	-4.68755
Geoemyda_spengleri	-3.93	2.9	-0.101	4.19	0.558	1.5	-3.94	2.89	-0.0673	-3.94	2.6307	0.173085	-4.09477	2.43569	0.414989	-4.12	2.23123	0.71235	-4.23262	2.04738	0.997132	-4.18213	1.84936	1.27276	-4.27926	1.61185	1.52815	-4.33723	1.35661	1.77616	-4.06883	1.19441	1.87	-3.9304	0.969727	2.07879	-3.71923	0.770073	2.29077	-3.43158	0.644211	2.42	-3.12636	0.527951	2.57182	-2.8187	0.43661	2.72	-2.48501
Manouria_impressa	12.2	2.63	1.89	-13.5	-0.669	-1.16	12.2	2.66	1.82	12.2739	2.76478	0.667798	12.9224	2.85447	-0.383491	13.6534	3.10069	-1.3181	13.4	3.25172	-2.23655	13.1	3.15729	-3.19744	13.2	3.21	-4.44879	12.8344	3.31	-5.59877	12.171	3.3813	-6.54449	11.5	2.81294	-6.72119	10.7009	2.81	-7.51947	9.67525	2.82	-8.231	8.43993	2.74496	-8.45832	7.45518	2.39707	-8.60827	6.22992
Platemys_platycephala	-2.75	5.05	-3.16	6.73	-3.91	4.58	-2.82	5.02	-3.12	-3.22077	4.79948	-2.88948	-3.581	4.5692	-2.589	-3.88609	4.26934	-2.29238	-4.12671	3.90994	-1.99994	-4.32496	3.53843	-1.69008	-4.43691	3.14161	-1.36852	-4.46	2.74163	-1.0331	-4.40049	2.3318	-0.716178	-4.3045	1.9325	-0.392605	-4.20819	1.55547	-0.0442741	-4.04777	1.16944	0.270895	-3.88179	0.810806	0.613119	-3.73724	0.483207	0.994441	-3.50497
Trachemys_scripta	3.38	5.52	-8.67	-1.72	-2.4	9.59	3.32	5.52	-8.7	2.7331	5.55509	-9.08981	1.98647	5.45	-9.42456	1.31485	5.3401	-9.45	0.629934	5.15835	-9.79055	-0.179709	4.96364	-9.78773	-0.956572	4.7656	-9.62399	-1.71441	4.6124	-9.386	-2.43673	4.45904	-8.99519	-3.07641	4.36519	-8.46877	-3.66271	4.30061	-7.8879	-4.19472	4.19459	-7.2514	-4.65028	4.03977	-6.56936	-5.03534	3.84977	-5.85421	-5.36857
Glyptemys_insculpta	-7.79	3.57	-1.88	9.04	-0.872	1.58	-7.81	3.52	-1.82	-8.04194	3.09408	-1.34612	-8.36546	2.70681	-0.841246	-8.67696	2.26152	-0.39834	-8.97902	1.80229	0.0587081	-9.151	1.3535	0.583498	-9.108	0.923601	1.142	-8.69767	0.589804	1.61699	-8.46498	0.195979	2.16503	-8.02348	-0.0756112	2.65652	-7.44137	-0.260356	3.01123	-6.81406	-0.468955	3.26826	-6.16135	-0.642063	3.50533	-5.50879	-0.772711	3.76795	-4.87149
Chrysemys_picta	1.93	-2.04	6.06	-1.44	5.28	-4.27	1.99	-2.04	6.05	2.4656	-2.02	5.92813	2.90486	-2.02503	5.71006	3.33475	-1.98	5.47728	3.75466	-1.98	5.22356	4.15431	-1.96	4.93569	4.48722	-1.85759	4.59278	4.77131	-1.69934	4.2218	5.02825	-1.54705	3.8288	5.23739	-1.37261	3.41891	5.38308	-1.16383	3.00458	5.45948	-0.941415	2.57262	5.49	-0.695518	2.14586	5.47	-0.448039	1.71929	5.43732
Proganochelys_quenstedti	-22	7.79	20.5	27.5	23.3	-0.383	-21.5	6.92	21.5	-21.2	3.73797	22.388	-22.5485	1.6688	24.2	-22	-0.802056	25.1588	-21.0696	-3.09733	26.7	-20.1	-5.41593	28.9815	-17.7059	-7.04412	30.1	-15.926	-9.19623	32.148	-13.167	-10.633	32.667	-11.0261	-12.9	32.2739	-7.99121	-14.2467	32.6	-4.88202	-14.8	31.4117	-1.59509	-15.186	30.286	1.5367	-14.5605	28.9605	4.81783
Proterochersis_robusta	-1.83	9.43	-72.5	-1.12	6.69	-36.3	-1.93	9.41	-72.5	-3.31069	8.70599	-72.4	-4.89842	8.39039	-72.5	-6.39052	8.19895	-72.4	-7.72925	7.6705	-71.9	-9.17055	7.03315	-71.9	-10.327	6.30651	-71.173	-11.3205	5.80192	-70.4	-12.5	5.12437	-69.8146	-13.5	4.53976	-68.8663	-14.3311	3.85135	-67.7689	-15.3	2.87871	-67.3	-15.7529	2.04299	-66.0471	-16.2446	1.42772	-64.6554	-16.6
Plesiochelys_bigleri	171	21.4	-21.5	-257	-12.9	24.9	172	23.9	-23.7	172.134	40.975	-34.3607	180	57.9307	-42.1327	175.627	75.5963	-48.8722	168.684	90.9839	-59.8313	161.343	104.657	-72.9544	147.576	111.808	-85.9394	133.546	119.636	-96.3543	121.728	130.181	-105.181	107.59	142.205	-111	90.1347	150.803	-114.803	75.8298	150.912	-113.365	78.8728	153.881	-115.083	79.5583	154.291	-113.328	74.7445
[truncated: 197 more columns]

## Sheet: SET3_resampled
	V1	V2	V3	V4	V5	V6	V7	V8	V9	V10	V11	V12	V13	V14	V15	V16	V17	V18	V19	V20	V21	V22	V23	V24	V25	V26	V27	V28	V29	V30	V31	V32	V33	V34	V35	V36	V37	V38	V39	V40	V41	V42	V43	V44	V45	V46	V47	V48	V49
Dermatemys_mawi	-7.36	-2.75	-0.0311	6.76	-3.06	-0.0666	-7.3	-2.88	-0.0461	-6.3652	-3.23103	-0.130309	-5.37065	-3.45987	-0.18597	-4.38676	-3.73108	-0.24818	-3.39275	-3.95572	-0.305	-2.37425	-4.05083	-0.320083	-1.35274	-4.10919	-0.324459	-0.333704	-4.19	-0.33768	0.689043	-4.21	-0.338742	1.70934	-4.14295	-0.324443	2.72777	-4.04945	-0.315945	3.7451	-3.94499	-0.307997	4.75018	-3.76262	-0.266524	5.74235	-3.52071	-0.208142	6.7
Staurotypus_triporcatus	1.85	0.201	-5.09	-3.17	-3.2	4.55	1.81	0.139	-5	1.50656	-0.312854	-4.3985	1.18836	-0.725755	-3.77672	0.870324	-1.13563	-3.15265	0.549324	-1.54478	-2.53043	0.206112	-1.87667	-1.87445	-0.154229	-2.15355	-1.2029	-0.520339	-2.35525	-0.508848	-0.859188	-2.62546	0.174977	-1.19391	-2.81696	0.889683	-1.54011	-2.9667	1.60857	-1.91608	-3.06031	2.32185	-2.29575	-3.14368	3.03414	-2.69109	-3.21158	3.73901	-3.1
Claudius_angustatus	-1.09	-0.216	2.24	0.904	0.749	-2.66	-1.07	-0.211	2.21	-0.836215	-0.38648	1.9113	-0.643837	-0.559351	1.58094	-0.461575	-0.71285	1.2362	-0.306249	-0.852947	0.879588	-0.158626	-0.813813	0.487941	-0.0230692	-0.734268	0.0976942	0.105904	-0.642081	-0.291701	0.235294	-0.578353	-0.686488	0.371354	-0.496823	-1.07589	0.519876	-0.392992	-1.45469	0.651199	-0.157271	-1.77266	0.722146	0.133728	-2.06487	0.794498	0.416743	-2.36437	0.893
Sacalia_quadriocellata	-1.24	-1.91	1.29	1.8	0.0703	-2.28	-1.21	-1.9	1.23	-1.03412	-1.86353	0.920057	-0.844128	-1.77618	0.628838	-0.638166	-1.64441	0.366153	-0.425093	-1.49834	0.117344	-0.205428	-1.35616	-0.128341	0.0154319	-1.21355	-0.372679	0.233838	-1.06707	-0.617423	0.450472	-0.932786	-0.869602	0.665736	-0.805106	-1.12789	0.884829	-0.668125	-1.37775	1.09996	-0.538525	-1.63495	1.31935	-0.393489	-1.87935	1.54168	-0.19749	-2.08168	1.76
Mauremys_reevesii	0.572	1.8	-3.23	-0.573	-0.786	3.43	0.563	1.75	-3.21	0.481456	1.28364	-2.95091	0.397617	0.873928	-2.60847	0.303476	0.570837	-2.1712	0.208792	0.324039	-1.69881	0.118015	0.101537	-1.21294	0.0311239	-0.133934	-0.732611	-0.0442282	-0.343533	-0.245592	-0.11992	-0.542189	0.249837	-0.194442	-0.673176	0.770361	-0.285194	-0.822202	1.2837	-0.380959	-0.960414	1.79911	-0.462025	-1.05	2.32684	-0.530932	-0.973402	2.85799	-0.571
Apalone_mutica	5.76	0.0322	0.37	-2.15	2	-2.89	5.7	0.0141	0.328	5.14668	0.0143477	0.0396399	4.5917	0.023804	-0.244605	4.02992	0.078612	-0.510038	3.46207	0.160189	-0.75517	2.8864	0.24754	-0.979047	2.31734	0.345856	-1.21295	1.75882	0.462086	-1.46194	1.2079	0.651329	-1.68454	0.663551	0.835636	-1.92435	0.113712	1.0098	-2.1598	-0.450056	1.20109	-2.34109	-1.00216	1.42831	-2.51623	-1.53186	1.71106	-2.68053	-2.07
Pelusios_situatus	2.76	-0.0553	-11.9	-4.82	-8.1	5.88	2.73	-0.227	-11.9	2.33224	-1.44014	-11.1075	1.87185	-2.48661	-10.1062	1.30266	-3.16208	-8.87058	0.728741	-3.77482	-7.58208	0.158127	-4.34486	-6.27279	-0.383339	-4.95122	-4.96755	-0.898749	-5.6216	-3.68313	-1.43621	-6.19621	-2.36711	-1.98139	-6.78139	-1.05481	-2.5273	-7.36657	0.258221	-3.08143	-7.91715	1.58144	-3.63162	-8.43054	2.84396	-4.2	-8.415	4.26999	-4.75
Elseya_novaeguineae	2.44	2.68	-3.97	-4.73	-2.33	2.04	2.39	2.59	-4	1.99428	1.83857	-4.21429	1.54233	1.09389	-4.31	1.05373	0.367492	-4.28275	0.508479	-0.262197	-4.01973	-0.0764819	-0.787797	-3.63261	-0.671992	-1.25936	-3.19477	-1.25692	-1.69985	-2.71446	-1.83773	-2.08515	-2.18227	-2.41514	-2.42108	-1.61337	-2.98367	-2.67947	-1.00207	-3.50727	-2.78068	-0.313373	-3.93916	-2.72028	0.444384	-4.34797	-2.58469	1.20594	-4.7
Chelydra_serpentina	-9.8	6.31	-1.47	11.8	6.05	-1.07	-9.75	6.25	-1.5	-8.21725	6.28909	-1.63	-6.65854	6.33	-1.80768	-5.12598	6.46	-2.1055	-3.57018	6.55	-2.27442	-2.02224	6.34064	-2.3	-0.536883	5.87246	-2.44377	0.957009	5.44557	-2.58	2.4821	5.74602	-2.44	3.98365	6.17012	-2.28329	5.52241	6.36	-2.06952	7.06026	6.31997	-1.74995	8.59697	6.1853	-1.45061	10.144	6.12	-1.1956	11.7
Carettochelys_insculpta	-18.2	-6.58	53.3	-6.65	5.55	30.3	-18.1	-6.49	53.1	-17.4234	-5.54341	51.5468	-16.7063	-4.59507	50.0063	-16.1	-3.66078	48.451	-15.3199	-2.79791	46.8398	-14.4609	-1.97696	45.2218	-13.6408	-1.19299	43.5815	-12.7914	-0.413872	41.9743	-12.0449	0.45238	40.3347	-11.3418	1.32816	38.6837	-10.5879	2.22209	37.0758	-9.72585	3.07203	35.4788	-8.78028	3.85407	33.8861	-7.84595	4.6188	32.278	-6.86
Emys_orbicularis	0.493	2.09	-3.13	-0.619	-1.07	2.13	0.489	2.04	-3.11	0.454625	1.6215	-2.92575	0.410141	1.23284	-2.68428	0.360009	0.90055	-2.37339	0.304994	0.658121	-1.98711	0.225543	0.432739	-1.59417	0.111808	0.200214	-1.21369	-0.0163098	-0.026516	-0.834165	-0.140557	-0.248821	-0.450575	-0.262429	-0.482486	-0.0730816	-0.383562	-0.714222	0.305839	-0.486815	-0.906867	0.710549	-0.560234	-1.03279	1.14676	-0.604606	-1.09	1.6006	-0.62
Pelomedusa_subrufa	0.17	0.883	-2.73	-2.17	-1.39	3.26	0.155	0.84	-2.72	-0.0225494	0.495487	-2.41081	-0.211711	0.301844	-1.98822	-0.39208	0.188496	-1.53248	-0.567539	0.0955114	-1.07009	-0.715135	0.0677417	-0.601574	-0.862019	-0.0348966	-0.131136	-1.01846	-0.186582	0.322239	-1.18337	-0.405747	0.741771	-1.35155	-0.725412	1.08541	-1.5143	-0.979156	1.47859	-1.68893	-1.23524	1.87417	-1.86214	-1.44214	2.2975	-2.02796	-1.54	2.75491	-2.16
Psammobates_tentorius	3.41	0.312	-2	-3.87	0.465	-1.87	3.37	0.282	-2.01	2.99492	-0.0953068	-2.16902	2.52038	-0.37842	-2.29392	1.99024	-0.565627	-2.38	1.42554	-0.619	-2.39	0.856537	-0.611122	-2.37	0.290367	-0.59343	-2.34	-0.273904	-0.545541	-2.32	-0.83733	-0.595874	-2.34	-1.40161	-0.596	-2.32	-1.96939	-0.582606	-2.29	-2.5325	-0.520287	-2.24964	-3.05722	-0.326667	-2.14759	-3.51423	-0.0112666	-2.03144	-3.84
Homopus_femoralis	3	2.2	-1.32	-2.69	1.31	-0.308	2.98	2.14	-1.36	2.64995	1.88998	-1.50335	2.2772	1.66594	-1.58469	1.86221	1.51492	-1.59	1.4341	1.42082	-1.53082	1.00543	1.34513	-1.44513	0.581552	1.25562	-1.35041	0.156827	1.17783	-1.25522	-0.268117	1.09037	-1.17056	-0.699053	1.0119	-1.1019	-1.13065	0.934902	-1.03322	-1.56189	0.901089	-0.937801	-1.97802	0.932505	-0.792991	-2.33975	1.07487	-0.58081	-2.65
Kinixys_belliana	3.7	0.776	-1.22	-4.1	0.173	-0.508	3.66	0.719	-1.24	3.26565	0.286328	-1.37812	2.79211	-0.0691507	-1.48798	2.22996	-0.276677	-1.52889	1.63444	-0.373396	-1.52	1.03411	-0.395907	-1.46473	0.436543	-0.436162	-1.38784	-0.159628	-0.488098	-1.31195	-0.75489	-0.549606	-1.24415	-1.35165	-0.627374	-1.19604	-1.9516	-0.66102	-1.14	-2.55186	-0.647111	-1.08352	-3.12552	-0.518513	-0.956233	-3.63693	-0.25693	-0.770272	-4.06
Rafetus_euphraticus	-8.8	4.56	-3	9.08	-1.66	2.46	-8.69	4.41	-3.1	-7.7436	3.29254	-3.70426	-6.67303	2.22529	-4.17566	-5.42326	1.31365	-4.38039	-4.06243	0.538595	-4.31373	-2.62972	-0.0217969	-3.98789	-1.19877	-0.583483	-3.6533	0.243599	-1.10646	-3.26265	1.65768	-1.72256	-2.92744	3.05064	-2.15758	-2.33452	4.41747	-2.51566	-1.6482	5.77068	-2.73089	-0.878996	6.97721	-2.64173	0.118442	8.03402	-2.26479	1.23402	9.01
Platysternon_megacephalum	-1.28	3.18	-1.24	2.2	-0.399	3.01	-1.22	3.17	-1.14	-0.995021	3.11167	-0.729875	-0.757362	2.99888	-0.338616	-0.516203	2.86006	0.0329764	-0.258242	2.62335	0.348976	-0.00302097	2.37541	0.658502	0.247332	2.12325	0.968938	0.49409	1.88291	1.29064	0.747523	1.59236	1.55764	1.01242	1.30758	1.82242	1.27745	1.04255	2.10745	1.52846	0.761576	2.39058	1.76282	0.449665	2.65282	1.96855	0.0669465	2.83391	2.17
Pelodiscus_sinensis	-4.15	2.04	-2.26	5.05	0.488	-0.576	-4.07	1.99	-2.27	-3.46618	1.66809	-2.3	-2.85588	1.36294	-2.33	-2.21877	1.11626	-2.31875	-1.55736	0.963776	-2.22304	-0.892658	0.853358	-2.09504	-0.226811	0.775444	-1.95111	0.437638	0.702351	-1.79753	1.09357	0.525928	-1.71607	1.75349	0.356152	-1.6395	2.41766	0.213756	-1.54904	3.0845	0.137	-1.42388	3.7262	0.200838	-1.18908	4.3526	0.298705	-0.92675	4.96
Stigmochelys_pardalis	6.03	0.24	0.0757	-6.17	-0.267	-1.17	5.99	0.165	0.022	5.59784	-0.515105	-0.472673	4.78294	-0.879658	-0.785199	3.87759	-1.04	-0.986138	2.92724	-1.01	-1.03	1.98827	-1.03686	-1.11686	1.06386	-1.00929	-1.17	0.128227	-0.974722	-1.20216	-0.763906	-1.06564	-1.30282	-1.70117	-1.09302	-1.38954	-2.64319	-1.16155	-1.51309	-3.58275	-1.24909	-1.64909	-4.52771	-1.18807	-1.69	-5.42356	-0.89883	-1.57858	-6.11
Dermochelys_coriacea	0.258	0.699	4.91	-0.805	2	-2.68	0.259	0.541	4.85	0.244939	-0.128796	4.49286	0.225143	-0.794116	4.13065	0.156406	-1.26232	3.53899	0.0762619	-1.69188	2.91921	-0.062021	-1.81	2.2069	-0.207812	-1.81	1.46167	-0.318068	-1.82525	0.726238	-0.409975	-1.48459	0.113662	-0.525644	-1.17839	-0.569705	-0.630565	-0.81843	-1.22469	-0.685491	-0.184568	-1.63243	-0.739815	0.426965	-2.07815	-0.772392	1.11405	-2.37714	-0.801
Chelonoidis_carbonaria	3.67	-1.09	-2.06	-4.31	-1.55	0.606	3.6	-1.15	-2.07	3.08033	-1.47763	-2.08	2.50307	-1.66962	-2.00077	1.91481	-1.74	-1.83056	1.33043	-1.76663	-1.63348	0.748156	-1.79442	-1.4321	0.170615	-1.81	-1.21419	-0.375412	-1.78451	-0.991637	-0.940034	-1.89167	-0.825823	-1.526	-1.969	-0.653651	-2.10775	-2.00878	-0.455409	-2.68674	-2.06667	-0.245307	-3.26179	-2.06711	-0.0210518	-3.7911	-1.91284	0.252018	-4.24
Rhinoclemmys_annulata	-5.19	-1.8	2.19	4.62	-1.1	-2.97	-5.15	-1.87	2.15	-4.61191	-2.37206	1.77493	-3.95682	-2.64864	1.36697	-3.22967	-2.69	0.975772	-2.49267	-2.62908	0.603334	-1.75877	-2.5361	0.232192	-1.02724	-2.45198	-0.145438	-0.312431	-2.44806	-0.560147	0.38781	-2.36222	-0.957017	1.11112	-2.29563	-1.35056	1.84589	-2.25	-1.72795	2.58237	-2.19252	-2.10119	3.31714	-2.05796	-2.45306	4.00654	-1.7123	-2.73885	4.57
Emydura_macquarii	4.78	0.157	-1.04	-4.51	0.0538	-1.2	4.71	0.12	-1.09	4.15976	-0.179095	-1.42634	3.5683	-0.445222	-1.72085	2.95003	-0.70299	-1.95999	2.28069	-0.894832	-2.0999	1.582	-1.00008	-2.1776	0.871941	-1.02582	-2.2	0.16077	-1.04	-2.21	-0.547829	-1.08	-2.22	-1.25895	-1.09	-2.18789	-1.95864	-1.01591	-2.09591	-2.61981	-0.824934	-1.9172	-3.26438	-0.599883	-1.71732	-3.87331	-0.317677	-1.48334	-4.45
Astrochelys_radiata	0.611	-1.99	1.65	0.796	1.61	-3.5	0.6	-1.94	1.6	0.578401	-2.05	1.16761	0.562395	-1.95198	0.7141	0.560746	-1.75254	0.300191	0.602722	-1.52834	-0.102719	0.609313	-1.23458	-0.463063	0.650972	-1.03021	-0.874728	0.652663	-0.809505	-1.28229	0.655456	-0.51937	-1.64674	0.724597	-0.213028	-1.98597	0.742097	0.0678651	-2.35487	0.747	0.338969	-2.73371	0.759365	0.696655	-3.03388	0.78055	1.07374	-3.30187	0.797
Pyxis_arachnoides	-0.931	1.46	-3.08	0.302	-1.93	3.09	-0.92	1.37	-3.05	-0.859695	0.877058	-2.84798	-0.793918	0.39829	-2.60891	-0.707233	0.00464441	-2.25479	-0.611025	-0.306831	-1.82466	-0.522946	-0.614189	-1.38973	-0.450896	-0.899917	-0.938373	-0.388779	-1.15158	-0.472545	-0.316339	-1.42189	-0.016243	-0.230799	-1.64911	0.463003	-0.133693	-1.8428	0.956537	-0.0341962	-2.02403	1.45412	0.0721051	-2.097	1.97403	0.179909	-2.03745	2.49891	0.286
Phrynops_tuberosus	-10.2	-1.78	-1.67	9.72	-1.45	0.415	-10.1	-1.87	-1.67	-8.78227	-2.51387	-1.67484	-7.45353	-3.12882	-1.7761	-6.00298	-3.32588	-1.70824	-4.54045	-3.28442	-1.56325	-3.08784	-3.16943	-1.36414	-1.6443	-3.01962	-1.12405	-0.198557	-2.89826	-0.898259	1.26348	-3.00312	-0.77721	2.72606	-3.12528	-0.679037	4.19295	-3.19132	-0.592891	5.65923	-3.16003	-0.488065	7.07556	-2.86111	-0.280889	8.32895	-2.19587	0.103616	9.61
Podocnemis_vogli	0.684	4.86	-8.7	-7.62	0.358	7.2	0.554	4.84	-8.6	-0.514188	4.70768	-7.82151	-1.39665	4.495	-6.84835	-2.19742	4.27753	-5.80595	-2.92813	4.0482	-4.71553	-3.57284	3.78358	-3.57979	-4.16598	3.48947	-2.42296	-4.73289	3.19325	-1.25566	-5.34658	2.89186	-0.111805	-5.94387	2.57806	1.03774	-6.47696	2.25587	2.21523	-6.90599	1.87881	3.41836	-7.36588	1.46695	4.59199	-7.52597	0.971128	5.81718	-7.6
Lissemys_punctata	3.93	0.272	-3.1	-3.3	-1.01	1.82	3.89	0.218	-3.1	3.41674	-0.216722	-2.93558	2.90389	-0.566924	-2.70695	2.36731	-0.825257	-2.41275	1.8277	-1.02216	-2.08011	1.28794	-1.09916	-1.7071	0.743414	-1.17728	-1.34696	0.217836	-1.33278	-0.981891	-0.297958	-1.45038	-0.58638	-0.800132	-1.59338	-0.177235	-1.33614	-1.72	0.192539	-1.86123	-1.69554	0.596428	-2.37739	-1.59932	1.00298	-2.86775	-1.41535	1.4062	-3.27
Chelodina_oblonga	4.66	3.03	-2.39	-3.93	-0.234	2.94	4.61	2.88	-2.43	4.21689	2.10849	-2.53	3.70853	1.39709	-2.52285	3.17283	0.708183	-2.4687	2.53629	0.165549	-2.28598	1.80618	-0.150967	-1.92179	1.0646	-0.420374	-1.54247	0.330744	-0.680276	-1.14288	-0.370888	-0.917464	-0.676387	-1.06696	-1.15281	-0.200412	-1.76231	-1.34678	0.294133	-2.38645	-1.29613	0.876455	-2.91419	-1.03817	1.52457	-3.42402	-0.73352	2.16625	-3.84
Mesoclemmys_dahli	-3.52	4.14	-3.86	4.47	-0.903	1.58	-3.49	4.04	-3.87	-3.1523	3.28613	-3.82846	-2.75779	2.55802	-3.74	-2.25966	1.9431	-3.56483	-1.63156	1.56578	-3.17578	-1.00297	1.19149	-2.78149	-0.389137	0.795665	-2.38185	0.226433	0.413479	-1.97261	0.846196	0.0606217	-1.548	1.47175	-0.265424	-1.1055	2.0998	-0.630447	-0.697848	2.72024	-1.00842	-0.289399	3.32269	-1.14676	0.241227	3.86303	-1.03337	0.864343	4.4
Chersina_angulata	-2.45	-0.558	0.256	3.27	0.614	-1.62	-2.41	-0.579	0.229	-2.06034	-0.730847	-0.0126621	-1.68177	-0.815823	-0.244116	-1.27929	-0.779886	-0.443314	-0.872325	-0.700433	-0.623974	-0.451312	-0.626462	-0.772777	-0.022321	-0.5534	-0.89752	0.399637	-0.437661	-1.00861	0.808943	-0.381172	-1.18242	1.22578	-0.303773	-1.33859	1.64999	-0.219002	-1.464	2.07557	-0.113189	-1.57139	2.491	0.0439098	-1.65517	2.87948	0.272587	-1.6681	3.22
Gopherus_polyphemus	-5.37	-0.286	-2.86	5.08	-2.6	2.13	-5.31	-0.445	-2.89	-4.75966	-1.13848	-2.78797	-4.15065	-1.7624	-2.6388	-3.39436	-2.11188	-2.33218	-2.59998	-2.30385	-1.97845	-1.81348	-2.42807	-1.57674	-1.04364	-2.58344	-1.16656	-0.271869	-2.76786	-0.771811	0.517468	-2.95737	-0.413806	1.31478	-3.16136	-0.0774875	2.11099	-3.35291	0.273851	2.89905	-3.45409	0.676934	3.67929	-3.41658	1.10245	4.36911	-3.1248	1.5752	5
Sternotherus_odoratus	2.66	0.989	-1.74	-2.44	-1.21	0.363	2.61	0.957	-1.73	2.30022	0.657455	-1.7	1.98867	0.367385	-1.66	1.65752	0.111011	-1.57251	1.29477	-0.0622377	-1.41791	0.910527	-0.177199	-1.25892	0.526914	-0.299655	-1.10041	0.154455	-0.444782	-0.942236	-0.21039	-0.636303	-0.811988	-0.578229	-0.825805	-0.682337	-0.946075	-1.01209	-0.548328	-1.32321	-1.14464	-0.386717	-1.69251	-1.17	-0.169992	-2.04383	-1.18	0.078338	-2.39
Graptemys_geographica	4.88	1.49	-2.79	-4.21	-2.98	2.98	4.79	1.39	-2.75	4.20581	0.860759	-2.45545	3.63728	0.292798	-2.20324	3.02725	-0.178505	-1.86435	2.39062	-0.553043	-1.46237	1.77482	-0.96025	-1.10937	1.1368	-1.36213	-0.749115	0.483653	-1.67449	-0.327602	-0.177775	-1.96503	0.094742	-0.846788	-2.208	0.536392	-1.52867	-2.46717	0.939352	-2.21492	-2.72746	1.34932	-2.87688	-2.93738	1.81951	-3.48283	-2.86	2.35426	-4.12
Clemmys_guttata	1.82	-0.71	2.76	-1.33	0.848	-2.98	1.81	-0.741	2.72	1.6461	-0.911819	2.28524	1.4494	-0.996647	1.84234	1.19935	-0.927741	1.41914	0.940345	-0.799607	1.01558	0.691247	-0.668013	0.60493	0.451088	-0.561336	0.1818	0.211273	-0.412851	-0.223768	-0.0204484	-0.310797	-0.642034	-0.257654	-0.194338	-1.06426	-0.478606	-0.120676	-1.50427	-0.684072	-0.0176333	-1.94425	-0.883847	0.143399	-2.3688	-1.09365	0.459205	-2.68365	-1.3
Deirochelys_reticularia	5.54	-1.77	-0.767	-4.59	-1.2	-2.16	5.46	-1.84	-0.811	4.88663	-2.28891	-1.11076	4.24745	-2.6617	-1.38085	3.57472	-2.98611	-1.62306	2.82144	-3.11	-1.80078	2.04387	-3.11	-1.92419	1.26563	-3.07371	-2.04258	0.48818	-3.02245	-2.16511	-0.287466	-2.9427	-2.2773	-1.06521	-2.86062	-2.37938	-1.84456	-2.76818	-2.44	-2.61671	-2.61855	-2.43618	-3.30475	-2.24893	-2.37316	-3.92977	-1.77895	-2.28128	-4.52
Malaclemys_terrapin	-1.81	-0.329	2.26	1.77	1.35	-2	-1.78	-0.317	2.21	-1.62131	-0.501901	1.83262	-1.43611	-0.669539	1.46018	-1.18778	-0.680296	1.11778	-0.881787	-0.480411	0.85427	-0.592947	-0.306213	0.553567	-0.326044	-0.139417	0.23026	-0.0569545	-0.0127641	-0.107928	0.220363	0.07665	-0.451065	0.499598	0.177794	-0.791609	0.769051	0.272079	-1.14184	1.04097	0.353325	-1.49162	1.30762	0.543703	-1.77508	1.54448	0.901759	-1.91298	1.75
Kinosternon_baurii	0.719	-1.45	2.24	2.45	-0.176	-2.6	0.732	-1.49	2.21	0.873584	-1.64099	1.87703	0.994985	-1.72	1.51412	1.12133	-1.60867	1.16312	1.23558	-1.48884	0.806076	1.34564	-1.35436	0.453201	1.45943	-1.23057	0.0970337	1.57875	-1.13094	-0.265653	1.70207	-1.04698	-0.630483	1.82527	-0.976892	-0.99802	1.95009	-0.937949	-1.37023	2.07379	-0.865451	-1.73791	2.20211	-0.761684	-2.09421	2.31807	-0.515418	-2.37226	2.44
Emydoidea_blandingii	2.28	0.34	-2.36	-3.88	-1.1	0.185	2.18	0.312	-2.33	1.8042	0.081235	-2.26168	1.35089	0.00633402	-2.10436	0.901682	-0.073007	-1.9394	0.457467	-0.195122	-1.78554	0.0303983	-0.321478	-1.5936	-0.377045	-0.440704	-1.36648	-0.799059	-0.468993	-1.13997	-1.23838	-0.569597	-0.990485	-1.67857	-0.654857	-0.811621	-2.1096	-0.730921	-0.601191	-2.53133	-0.849651	-0.391964	-2.9719	-0.971841	-0.228064	-3.40074	-1.08	-0.0365106	-3.82
Eretmochelys_imbricata	-3.7	-2.08	-42.2	-2.19	12.6	-64.4	-3.7	-1.96	-42.6	-3.5992	-0.657706	-44.012	-3.50143	0.590341	-45.4786	-3.39119	1.94126	-46.8321	-3.26469	3.32373	-48.1531	-3.21868	4.28868	-49.6736	-3.25	4.81745	-51.5055	-3.24	5.68301	-53.21	-3.0796	6.8676	-54.652	-2.89272	8.1423	-56	-2.78486	9.52971	-57.1486	-2.70114	10.2	-58.8886	-2.53417	10.8722	-60.6444	-2.37476	11.6016	-62.4033	-2.22
Geochelone_elegans	2.24	1.13	-1.06	-3.03	0.401	0.0663	2.18	1.1	-1.08	1.89823	0.85784	-1.2	1.52157	0.715915	-1.18974	1.13585	0.596706	-1.16512	0.746114	0.511412	-1.1	0.355979	0.430168	-1.03234	-0.0319728	0.371042	-0.937447	-0.415951	0.32451	-0.836009	-0.804522	0.254526	-0.756255	-1.19578	0.22337	-0.657633	-1.5924	0.171633	-0.589393	-1.98376	0.170437	-0.482434	-2.36664	0.185931	-0.349344	-2.73938	0.217938	-0.192473	-3.02
Chelonia_mydas	69.5	-2.9	-163	16.5	45.3	-146	69.5	-2.41	-163	67.5696	2.54694	-162	64.889	7.0587	-161	61.1628	10.8779	-160	56.8601	13.82	-158.9	52.7926	16.3037	-157	47.4851	18.9537	-157	43.6271	21.5864	-155.068	40.1208	25.439	-154	37.3352	29.9747	-153	34.6987	33.7013	-151	31.4462	37.7538	-150	27.3491	41.317	-149	22.4706	43.8269	-148	17.2
Actinemys_marmorata	-0.148	-0.411	3.4	3.14	0.777	-2.58	-0.127	-0.431	3.37	0.0365744	-0.730556	3.00148	0.265514	-0.816656	2.54932	0.510391	-0.725036	2.10307	0.758403	-0.598067	1.66689	1.00037	-0.478253	1.22515	1.23769	-0.347914	0.784333	1.46507	-0.179958	0.352024	1.71106	-0.132894	-0.0990313	1.9589	-0.0848507	-0.550897	2.20582	-0.0256834	-1.00212	2.46169	0.0317346	-1.44753	2.71635	0.121017	-1.88794	2.95708	0.352906	-2.27561	3.13
Terrapene_carolina	-1.41	-1.6	2.37	3.08	-0.719	-1.92	-1.34	-1.63	2.3	-1.04814	-1.73598	1.98814	-0.723221	-1.73848	1.69089	-0.402904	-1.69288	1.39019	-0.0855334	-1.62621	1.09105	0.228673	-1.54605	0.79192	0.54268	-1.45975	0.494346	0.854619	-1.35354	0.202496	1.17732	-1.31378	-0.0931342	1.51031	-1.25661	-0.377927	1.83625	-1.2	-0.670417	2.15223	-1.14463	-0.97223	2.46064	-1.07645	-1.28064	2.75861	-0.972745	-1.58861	3.03
Testudo_graeca	3.89	-2.07	3.75	-3.84	1.41	-3.59	3.87	-2.15	3.67	3.4909	-2.5039	3.02699	2.96277	-2.54319	2.37277	2.3808	-2.293	1.8156	1.80028	-1.87143	1.36771	1.23354	-1.50824	0.872539	0.6499	-1.13113	0.389617	0.0739449	-0.809889	-0.130726	-0.496486	-0.640369	-0.730993	-1.04477	-0.514332	-1.36334	-1.58733	-0.361845	-1.99522	-2.1571	-0.228391	-2.5971	-2.75585	0.0961666	-3.0993	-3.31446	0.628008	-3.44048	-3.78
Hydromedusa_tectifera	-1.09	3.63	-4.93	2.18	-1.86	3.29	-1.05	3.57	-4.88	-0.800954	2.92524	-4.54572	-0.577964	2.21418	-4.35282	-0.332193	1.80577	-3.75539	-0.0925641	1.48255	-3.09765	0.127466	1.15033	-2.43946	0.335248	0.824371	-1.76973	0.551303	0.416256	-1.15863	0.767113	-0.0104792	-0.55742	0.988148	-0.511501	-0.0127673	1.21284	-0.970682	0.565099	1.4536	-1.416	1.1472	1.70324	-1.78549	1.77423	1.8907	-1.71643	2.51496	2.15
Orlitia_borneensis	4.41	1.23	-7.16	-2.15	-5.6	4.54	4.35	1.13	-7.06	3.96938	0.274879	-6.49289	3.55163	-0.522227	-5.85745	3.08385	-1.22661	-5.15339	2.57796	-1.84204	-4.39595	2.08963	-2.33822	-3.55318	1.64247	-2.85753	-2.73245	1.15648	-3.37693	-1.90966	0.691748	-3.6165	-1.0135	0.23976	-4.24249	-0.377519	-0.235347	-4.70555	0.496298	-0.707213	-5.07454	1.40344	-1.18018	-5.35008	2.36035	-1.63127	-5.50516	3.35286	-2.07
Cuora_amboinensis	3.78	-0.735	-3.61	-3.43	-2.66	2.73	3.71	-0.764	-3.54	3.22837	-1.09582	-3.21628	2.71464	-1.32801	-2.80332	2.19317	-1.54473	-2.39053	1.66329	-1.71934	-1.97263	1.14004	-1.88999	-1.54503	0.620202	-2.02997	-1.10017	0.111714	-2.13398	-0.643103	-0.406319	-2.29534	-0.211118	-0.927392	-2.41174	0.239783	-1.44845	-2.53169	0.688945	-1.96085	-2.62017	1.15068	-2.46233	-2.68748	1.63233	-2.93888	-2.72	2.14203	-3.37
Notochelys_platynota	5.72	-4.11	3.51	-3.56	1.41	-5.83	5.59	-4.04	3.46	4.83955	-3.76	3.07717	4.11259	-3.66452	2.36485	3.4355	-3.39275	1.65004	2.80138	-3.02297	0.939046	2.21539	-2.62577	0.198466	1.60606	-2.2084	-0.508405	0.963067	-1.84752	-1.21242	0.317209	-1.42109	-1.83426	-0.344578	-1.03823	-2.51411	-0.994943	-0.685372	-3.22169	-1.643	-0.28413	-3.903	-2.27361	0.175849	-4.56361	-2.88899	0.725067	-5.16899	-3.47
Cyclemys_dentata	-6.5	1.29	-3.93	3.97	-1.13	1.55	-6.46	1.21	-3.94	-5.8264	0.649718	-3.7252	-5.12817	0.182289	-3.47908	-4.36281	-0.0393768	-3.10792	-3.5803	-0.212698	-2.74515	-2.80395	-0.358059	-2.35697	-2.02564	-0.496762	-1.96782	-1.25774	-0.640686	-1.56402	-0.494281	-0.817496	-1.17566	0.272599	-0.974695	-0.770609	1.04477	-1.15675	-0.388193	1.81854	-1.33571	-0.00655343	2.58182	-1.46576	0.410367	3.2885	-1.39471	0.920919	3.9
Batagur_dhongoka	4.76	-0.856	-2.67	-4.18	-0.486	-3.6	4.66	-0.878	-2.7	4.04331	-0.973605	-2.84801	3.43528	-1.09342	-2.99894	2.81563	-1.18	-3.12644	2.18137	-1.18	-3.19096	1.54716	-1.21	-3.26587	0.91252	-1.21	-3.35522	0.292971	-1.18	-3.45616	-0.339344	-1.13121	-3.54	-0.973179	-1.11	-3.6	-1.60927	-1.11	-3.64785	-2.2432	-1.06904	-3.67	-2.85581	-0.887964	-3.65	-3.47151	-0.710699	-3.63	-4.08
Vijayachelys_silvatica	2.2	0.78	-2.84	-2.18	-1.91	1.14	2.19	0.742	-2.85	1.95395	0.312906	-2.83197	1.67901	-0.0474704	-2.65267	1.38965	-0.254243	-2.31448	1.09377	-0.399364	-1.94377	0.779385	-0.541419	-1.58671	0.444436	-0.688823	-1.25041	0.105504	-0.743024	-0.90455	-0.230818	-1.01644	-0.677014	-0.596296	-1.24657	-0.430882	-0.948591	-1.52353	-0.217337	-1.30558	-1.78846	0.00633934	-1.65605	-2.01042	0.277011	-1.95134	-2.03	0.669017	-2.17
Melanochelys_trijuga	4.49	0.34	-1.35	-4.31	-1.31	-0.343	4.47	0.298	-1.38	3.94851	-0.0579331	-1.5823	3.34863	-0.322972	-1.67438	2.69637	-0.465623	-1.64974	2.04258	-0.603431	-1.62	1.38948	-0.74655	-1.6	0.736516	-0.891997	-1.59	0.105372	-0.999	-1.47805	-0.528725	-1.12525	-1.46475	-1.16876	-1.21	-1.30966	-1.81197	-1.30723	-1.16416	-2.45765	-1.40961	-1.03039	-3.10441	-1.50068	-0.891016	-3.72917	-1.50771	-0.666645	-4.29
Caretta_caretta	6.14	1.18	-106	-9.93	-18.5	-90.5	5.95	0.847	-106	4.56135	-1.34787	-106	3.33575	-3.27022	-106.471	2.53344	-4.50084	-106	1.135	-6.68701	-106	0.0635467	-8.14968	-105.002	-1.11183	-9.47351	-104	-2.26915	-10.8559	-103	-3.1454	-12.0794	-101.603	-4.2435	-13.6058	-100.647	-5.34101	-15.1246	-99.2754	-6.45266	-16.3855	-97.3289	-7.61475	-17.0942	-95.2117	-8.76003	-17.6846	-93.0461	-9.8
Dogania_subplana	-2.77	-4.24	5.19	-2.86	5.3	-4.06	-2.76	-4.21	5.02	-2.7309	-3.87542	4.12354	-2.70238	-3.44908	3.26338	-2.69	-2.96347	2.43485	-2.71207	-2.37756	1.67549	-2.73174	-1.7361	0.961057	-2.75	-1.01591	0.326723	-2.76	-0.271871	-0.280887	-2.76738	0.421527	-0.946003	-2.77	1.08801	-1.63801	-2.76	1.80532	-2.27532	-2.77	2.56558	-2.85865	-2.79989	3.38915	-3.34958	-2.82	4.27557	-3.71798	-2.85
Heosemys_spinosa	6.21	1.67	3.51	-5.75	4.48	-0.204	6.18	1.76	3.52	5.58076	2.50363	3.49439	4.77594	2.96081	3.28838	3.88999	3.13667	2.97666	2.99802	3.24133	2.64601	2.08417	3.34948	2.38156	1.17729	3.50182	2.11637	0.280618	3.68293	1.83707	-0.592782	3.94025	1.56987	-1.46031	4.24344	1.29656	-2.34567	4.54088	1.08608	-3.22538	4.86327	0.88527	-4.10478	5.12164	0.605239	-4.9708	5.01307	0.243526	-5.68
Chelus_fimbriata	5.4	-0.935	-0.872	-5.85	-1.75	0.427	5.26	-1.01	-0.892	4.45778	-1.29095	-0.943643	3.65849	-1.58076	-1.00022	3.06015	-2.05002	-1.14004	2.24278	-1.92	-0.968133	1.40044	-1.87511	-0.8656	0.559974	-1.8619	-0.748795	-0.277494	-1.88019	-0.637884	-1.11757	-2.01454	-0.588122	-1.95843	-2.13979	-0.528157	-2.79569	-2.25734	-0.429798	-3.57772	-2.58	-0.40697	-4.19221	-2.17593	-0.133743	-4.97756	-1.96124	0.102418	-5.76
Macrochelys_temminckii	21.9	7.29	-61.5	3.6	12.6	-88.1	21.8	7.39	-61.8	20.7767	7.13	-63.835	19.7017	7.11009	-65.8974	18.578	7.41307	-67.8441	17.4388	8.21737	-69.6837	16.1073	8.79855	-71.4891	14.7861	9.10556	-73.3708	13.4062	9.35815	-75.2407	11.9924	9.70227	-77.0613	10.6091	10.0954	-78.8909	9.35605	10.6	-80.7512	8.0522	10.9	-82.6268	6.66699	11.2	-84.4472	5.20877	11.5956	-86.1912	3.8
Malacochersus_tornieri	0.497	-2.46	3.32	-0.35	2.57	-3.44	0.487	-2.47	3.15	0.43308	-2.30632	2.5708	0.370823	-1.99614	2.05817	0.300525	-1.56078	1.64894	0.253342	-1.24006	1.1401	0.208281	-0.818554	0.712762	0.163	-0.337551	0.349368	0.121701	0.118774	-0.0445375	0.0828414	0.364533	-0.592111	0.0270365	0.580893	-1.15417	-0.00421349	0.944441	-1.63026	-0.0719175	1.25106	-2.14075	-0.186873	1.53038	-2.66357	-0.271044	1.91696	-3.11696	-0.333
Malayemys_subtrijuga	-1.68	-3.43	1.8	2.33	-0.0281	-3.15	-1.66	-3.45	1.74	-1.45775	-3.48	1.24292	-1.24535	-3.5	0.746158	-0.968462	-3.35397	0.321653	-0.670504	-3.10081	-0.0522416	-0.374173	-2.8147	-0.405886	-0.0730661	-2.54214	-0.766623	0.231467	-2.24406	-1.09875	0.536249	-2.04024	-1.48976	0.855092	-1.76865	-1.83202	1.17872	-1.53752	-2.19872	1.47554	-1.32446	-2.59554	1.77762	-0.999956	-2.89381	2.05335	-0.557641	-3.02778	2.3
Indotestudo_elongata	-6.71	-0.684	-4.55	3.4	-4.91	5.97	-6.66	-0.788	-4.54	-6.08358	-1.80284	-4.27343	-5.40165	-2.61022	-3.78165	-4.57519	-2.85	-2.95959	-3.82317	-2.74772	-2.03476	-3.12313	-2.6	-1.07545	-2.38261	-2.62831	-0.13722	-1.602	-2.92511	0.716709	-0.82801	-3.4213	1.4813	-0.10773	-4.12159	2.12579	0.566223	-4.924	2.70644	1.26143	-5.63555	3.37143	2.03647	-6	4.1983	2.72467	-5.59955	5.06201	3.34
Pangshura_tentoria	5.22	-3.13	2.65	-5.09	-0.409	-3.54	5.15	-3.18	2.58	4.50769	-3.46712	1.99577	3.76972	-3.54863	1.48383	2.98534	-3.37845	1.04221	2.18696	-3.20087	0.630848	1.38482	-3.05096	0.213697	0.604739	-2.96217	-0.259403	-0.0375573	-2.79084	-0.700423	-0.776751	-2.60731	-1.19484	-1.51859	-2.35047	-1.66906	-2.26095	-2.11302	-2.15136	-3.00356	-1.93433	-2.65745	-3.74755	-1.70049	-3.12853	-4.43529	-1.20034	-3.42655	-5.02
Morenia_petersi	4.57	0.0796	-1.44	-2.95	-1.77	1.42	4.52	0.0256	-1.47	4.08151	-0.405486	-1.5837	3.60596	-0.806936	-1.60649	3.06497	-1.07584	-1.47832	2.49572	-1.24238	-1.28286	1.93959	-1.39612	-1.04184	1.38252	-1.56624	-0.809132	0.809015	-1.66112	-0.57829	0.226293	-1.79587	-0.397866	-0.356804	-1.90462	-0.195987	-0.93204	-2.01653	0.0167417	-1.49641	-2.1288	0.258444	-2.03185	-2.15704	0.57678	-2.49505	-2.02247	0.96756	-2.91
Geoemyda_spengleri	-0.0506	1.74	-2.79	-1.65	-0.259	2.76	-0.0604	1.64	-2.78	-0.113157	1.19306	-2.63948	-0.194467	0.824328	-2.35511	-0.31194	0.588414	-1.96353	-0.449967	0.424033	-1.54101	-0.587398	0.284589	-1.10888	-0.728543	0.143912	-0.678463	-0.865493	0.00955752	-0.245649	-1.0089	-0.167666	0.167288	-1.14824	-0.352659	0.580674	-1.27666	-0.510996	1.00866	-1.3952	-0.648327	1.44602	-1.49054	-0.708676	1.90378	-1.58004	-0.588874	2.35027	-1.65
Manouria_impressa	0.77	-5.8	7.41	1.62	1.33	-9.23	0.763	-5.93	7.27	0.814463	-6.5061	6.01684	0.909079	-6.6556	4.64822	1.01034	-6.32863	3.3059	1.12759	-5.84964	2.00893	1.21418	-5.35908	0.713949	1.28	-4.83596	-0.569695	1.35	-4.29145	-1.8418	1.42309	-3.68215	-3.0857	1.52252	-3.12985	-4.35535	1.62234	-2.5489	-5.6122	1.69924	-1.96534	-6.86933	1.74	-1.20649	-8.02351	1.72019	-0.085673	-8.82905	1.63
Platemys_platycephala	4.9	1.86	-2.49	-1.86	-1.47	2.03	4.85	1.79	-2.5	4.5074	1.24836	-2.52548	4.11444	0.743369	-2.49148	3.63065	0.440138	-2.20752	3.13263	0.2365	-1.85553	2.63873	0.0721295	-1.47748	2.1413	-0.0906707	-1.10093	1.64622	-0.297892	-0.74346	1.15832	-0.547819	-0.404971	0.679805	-0.853582	-0.100506	0.208684	-1.19417	0.179783	-0.276217	-1.50724	0.466057	-0.768874	-1.76514	0.788506	-1.22808	-1.78596	1.21808	-1.63
Trachemys_scripta	6.55	-1.61	-0.445	-4.68	0.332	-3.35	6.47	-1.69	-0.483	5.72986	-2.06369	-0.757594	4.93075	-2.297	-1.02525	4.11013	-2.42248	-1.28745	3.28384	-2.35548	-1.55904	2.45394	-2.24739	-1.80782	1.61757	-2.13751	-2.03748	0.784701	-2.00193	-2.25807	-0.0408219	-1.82694	-2.47306	-0.870199	-1.64043	-2.67957	-1.70263	-1.4711	-2.8889	-2.52215	-1.22558	-3.07331	-3.31649	-0.907189	-3.25027	-4.01811	-0.395134	-3.33	-4.63
Glyptemys_insculpta	0.0523	1.93	-6.19	-2.93	-2.59	3.07	0.0327	1.82	-6.17	-0.118671	1.08422	-5.89711	-0.317117	0.510124	-5.38599	-0.547973	0.0913429	-4.75008	-0.753852	-0.216374	-4.03716	-0.975312	-0.39412	-3.29455	-1.19975	-0.571702	-2.54424	-1.43895	-0.900108	-1.85684	-1.67527	-1.33054	-1.22183	-1.89694	-1.80389	-0.612813	-2.11885	-2.22827	0.0308745	-2.34288	-2.58813	0.711405	-2.56001	-2.82334	1.44669	-2.75745	-2.84255	2.21727	-2.91
Chrysemys_picta	-3.99	-0.854	1.45	4.51	0.0771	-0.758	-3.94	-0.874	1.41	-3.47178	-1.11929	1.03143	-2.94522	-1.27	0.682145	-2.34364	-1.23	0.440001	-1.72084	-1.12583	0.269501	-1.09318	-1.03331	0.108298	-0.461728	-0.942938	-0.0387347	0.171168	-0.845	-0.167394	0.801825	-0.799315	-0.335085	1.43411	-0.744015	-0.495102	2.06461	-0.696814	-0.662382	2.69878	-0.647122	-0.81672	3.32983	-0.528784	-0.919717	3.9167	-0.244763	-0.87933	4.48
Proganochelys_quenstedti	-11.9	19.1	-16.9	12.6	-9.72	22.5	-11.7	18.5	-16.6	-10.0373	15.0746	-15.1373	-8.43042	11.6295	-13.6432	-6.6488	8.40669	-11.9697	-4.99619	5.57389	-10.0662	-3.16224	3.36879	-7.14172	-1.21389	1.22595	-4.2416	0.629638	-0.962487	-1.30642	2.50213	-3.14015	1.6182	4.39133	-5.29666	4.54732	5.89256	-6.74535	7.90373	7.55875	-8.60906	11.0477	9.324	-9.40554	14.6369	11.0581	-9.72257	18.2904	12.5
Proterochersis_robusta	10.9	-1.09	-56.6	-13.6	-2.03	-57	10.7	-1.2	-56.6	9.16276	-2.10069	-56.8	7.46456	-2.78309	-56.8	5.70707	-2.7455	-57	3.92121	-2.46624	-56.9	2.14792	-2.00798	-56.9	0.410099	-1.50276	-56.8	-1.25112	-0.861193	-56.8569	-2.87073	-1.39296	-57.1	-4.52845	-2.0994	-57.2	-6.20142	-2.71706	-57.4	-7.96873	-3.18816	-57.4	-9.78369	-3.25974	-57.3	-11.5773	-2.9968	-57.2	-13.2
Plesiochelys_bigleri	44.6	-161	22.9	2.34	134	-119	43.6	-158	20.5	37.783	-144.766	1.77532	32.7996	-126.998	-13.0012	29.8975	-106.488	-24.1074	27.6025	-84.0256	-31.2934	25.1662	-61.0732	-37.1121	22.8349	-38.3661	-43.6082	20.525	-16.5003	-52.425	16.5416	2.74789	-65.3044	12.8457	21.5577	-79.2899	9.02022	40.4316	-93.2544	5.36403	60.3741	-105.324	2.80197	81.9562	-114.776	2.204	105.3	-118.66	2.42
[truncated: 92 more columns]

## Sheet: SET4_resampled
	V1	V2	V3	V4	V5	V6	V7	V8	V9	V10	V11	V12	V13	V14	V15	V16	V17	V18	V19	V20	V21	V22	V23	V24	V25	V26	V27	V28	V29	V30	V31	V32	V33	V34	V35	V36	V37	V38	V39	V40	V41	V42	V43	V44	V45	V46	V47	V48	V49
Dermatemys_mawi	-0.353	-2.16	11.4	-0.478	3.16	-12.3	-0.581	0.367	-8.6	-0.212	-5.78	9.69	-0.334	-1.92	11.3	-0.27566	-1.21089	10.7686	-0.217838	-0.441776	10.324	-0.168984	0.282791	9.80364	-0.132152	0.953967	9.20811	-0.122	1.52559	8.51661	-0.125	2.02166	7.76723	-0.117332	2.48224	6.99551	-0.0928441	2.9076	6.2048	-0.0765618	3.29382	5.39331	-0.0849524	3.57433	4.5463	-0.10157	3.8714	3.69764	-0.118309
Staurotypus_triporcatus	-8.66	3	-2.78	9.85	-0.297	5.46	5.83	-2.85	2.4	-6.37	-0.134	-2.84	-8.57	3.11	-2.69	-7.96629	3.30983	-2.28577	-7.32032	3.42993	-1.91018	-6.68456	3.58925	-1.53151	-6.06034	3.7986	-1.15772	-5.46805	4.08797	-0.787911	-4.83811	4.27865	-0.423083	-4.19112	4.41119	-0.0539203	-3.53861	4.49438	0.320641	-2.87442	4.53	0.682459	-2.20358	4.54	1.03344	-1.52997	4.49	1.36502	-0.850211
Claudius_angustatus	4.86	0.805	1.63	-4.02	2.21	-1.24	-2.56	-0.39	-1.16	3.44	-0.853	0.823	4.82	0.857	1.62	4.58702	1.10839	1.5654	4.33394	1.33764	1.51079	4.05902	1.54678	1.4558	3.78659	1.75561	1.3922	3.49736	1.94151	1.32924	3.20568	2.12288	1.26428	2.89106	2.25128	1.18745	2.56953	2.34682	1.09318	2.25042	2.45319	0.997765	1.93027	2.55189	0.898702	1.61021	2.64993	0.798062	1.29322
Sacalia_quadriocellata	2.82	-0.771	1.6	-3.25	1.37	-2.19	-2.41	0.471	-2.06	2.4	-2.04	0.646	2.78	-0.711	1.6	2.57753	-0.516434	1.52876	2.35908	-0.346671	1.45	2.18568	-0.114288	1.44	1.994	0.103184	1.43	1.81815	0.333188	1.44296	1.63889	0.558686	1.44578	1.41927	0.730073	1.37171	1.20718	0.914997	1.30087	0.995145	1.09988	1.23006	0.770217	1.25099	1.12901	0.540225	1.38876	1.02124	0.310333
Mauremys_reevesii	-5.4	3.07	0.0947	6.61	2.32	1.8	6.1	0.0254	0.955	-5.29	0.573	-0.833	-5.31	3.12	0.122	-4.96566	3.35167	0.261635	-4.63372	3.60017	0.404308	-4.27965	3.81772	0.54514	-3.91967	4.02016	0.692143	-3.56293	4.21853	0.85268	-3.22077	4.44462	1.00551	-2.81924	4.55297	1.12593	-2.39697	4.6205	1.22101	-1.98137	4.70675	1.32675	-1.57545	4.82702	1.44052	-1.16303	4.91628	1.54628	-0.737169
Apalone_mutica	3.69	3.78	-4.26	-1.98	-1.87	5.24	0.0678	-0.765	2.32	3.65	2.42	-4.9	3.66	3.78	-4.17	3.47405	3.74351	-3.7781	3.27393	3.58393	-3.42938	3.0825	3.45313	-3.06813	2.91655	3.45	-2.66638	2.74117	3.39029	-2.27263	2.55992	3.28994	-1.88984	2.3689	3.1526	-1.5241	2.17872	3.01936	-1.15776	1.97887	2.87165	-0.801468	1.77506	2.71205	-0.451799	1.57359	2.54487	-0.104165	1.3672
Pelusios_situatus	-14.3	3.55	-5.17	16.7	-2.44	5.05	13.3	-5.73	2.58	-15.3	0.897	-6.86	-14.2	3.68	-5.1	-13.2698	4.33718	-4.52584	-12.2932	4.88547	-3.91248	-11.3519	5.38164	-3.20355	-10.3819	5.90903	-2.54917	-9.39359	6.46093	-1.91998	-8.36004	6.92735	-1.29897	-7.25805	7.22572	-0.691787	-6.10269	7.37533	-0.121993	-4.94439	7.50958	0.446973	-3.78418	7.63337	1.00835	-2.60314	7.68351	1.53895	-1.40719
Elseya_novaeguineae	-5.68	4.71	-2.78	6.36	-4.36	4.65	4.44	-4.58	1.94	-5.87	2.19	-5.16	-5.62	4.71	-2.7	-5.18857	4.61232	-2.26857	-4.77466	4.57	-1.81159	-4.35998	4.536	-1.35597	-3.94074	4.48407	-0.903778	-3.50798	4.37539	-0.475796	-3.07871	4.26218	-0.0448014	-2.6609	4.16909	0.396647	-2.211	4.0084	0.78933	-1.75927	3.82404	1.16954	-1.36877	3.60939	1.59476	-0.956335	3.35837	1.97028	-0.483887
Chelydra_serpentina	1.23	0.45	-12.2	0.877	-0.244	11.5	0.928	3.54	6.72	1.33	6.35	-12.6	1.23	0.37	-12.1	1.20298	0.274636	-11.2298	1.2	0.101498	-10.3685	1.23	-0.114177	-9.51544	1.27914	-0.417224	-8.68944	1.25624	-0.74728	-7.87368	1.20918	-1.01164	-7.0518	1.18	-1.25515	-6.20617	1.19	-1.49535	-5.35883	1.21	-1.72759	-4.50965	1.22	-1.93909	-3.65395	1.17339	-2.12661	-2.79697	1.1
Carettochelys_insculpta	-12.1	-19.1	30.5	7.8	13.5	59.9	-1.01	10	54.1	-20.5	-14.4	30.1	-11.9	-19.2	30.6	-10.274	-19.1	31.363	-8.67269	-19	32.2108	-7.07954	-18.9397	33.0603	-5.5665	-18.7	33.9903	-4.15263	-18.1454	34.9546	-2.80179	-17.4513	35.9487	-1.55244	-16.6931	37.0069	-0.401992	-15.8019	38.0981	0.707867	-14.8928	39.2145	1.70305	-13.9093	40.3907	2.62157	-12.8237	41.5526	3.46679
Emys_orbicularis	-4.08	3.08	0.289	6.5	0.805	1.08	5.86	-0.376	0.292	-4.1	1.06	-1.09	-3.97	3.13	0.327	-3.62886	3.30464	0.44562	-3.27607	3.45506	0.563938	-2.91898	3.59034	0.687341	-2.55161	3.6896	0.814417	-2.17623	3.74	0.945255	-1.79519	3.75831	1.06662	-1.40764	3.76	1.1678	-1.01737	3.74	1.25033	-0.624064	3.72	1.32203	-0.230298	3.70242	1.39516	0.164488	3.67886	1.46229	0.558856
Pelomedusa_subrufa	-5.02	2.3	-0.583	5.4	-0.375	2.69	3.53	-0.791	1.63	-4.96	1.39	-0.808	-4.98	2.32	-0.55	-4.63822	2.43636	-0.337108	-4.28642	2.54679	-0.140851	-3.92773	2.67045	0.0399154	-3.55274	2.74745	0.217887	-3.16928	2.79014	0.385347	-2.80717	2.88571	0.573272	-2.42723	2.91	0.746832	-2.03876	2.92969	0.894587	-1.66832	2.91542	1.09084	-1.29363	2.95327	1.27655	-0.907692	2.9579	1.43581	-0.526404
Psammobates_tentorius	-0.19	3.96	-3.74	-0.21	-2.45	3.61	-0.205	-2.14	2.17	-0.329	2.14	-5.05	-0.185	3.98	-3.72	-0.157557	4.13628	-3.22115	-0.124789	4.38141	-2.74578	-0.116	4.58539	-2.24766	-0.107884	4.9241	-1.8559	-0.0934125	5.0415	-1.38725	-0.0661912	4.90847	-0.924888	-0.0578661	4.99	-0.393364	-0.0582848	5.16854	0.11494	-0.055741	5.15112	0.59503	-0.0457632	4.68172	0.836334	-0.0329607	4.3607	1.22581	-0.012574
Homopus_femoralis	-0.555	5.02	-2.47	1.44	-1.58	2.96	1.09	-0.963	2.12	-0.551	3.58	-3.4	-0.547	5.03	-2.43	-0.483348	5.05	-2.07674	-0.410341	4.98	-1.73799	-0.342682	4.90951	-1.38853	-0.280382	4.81	-1.04691	-0.213181	4.77	-0.694887	-0.131025	4.68128	-0.353614	-0.0608954	4.51561	-0.0390834	0.0273727	4.30946	0.240319	0.133071	4.10822	0.522989	0.235498	3.93909	0.828017	0.324101	3.72966	1.11034	0.404303
Kinixys_belliana	-0.783	4.93	-4.12	0.694	-3.42	5.01	0.54	-2.69	3.8	-0.898	2.83	-5.92	-0.781	4.93	-4.06	-0.749354	4.94	-3.53708	-0.710475	4.91184	-2.99844	-0.668511	4.91163	-2.46186	-0.628904	5.08055	-1.94904	-0.576919	5.25453	-1.44373	-0.5241	5.20367	-0.909467	-0.468918	5.03705	-0.39966	-0.405399	4.848	0.104016	-0.343064	4.60021	0.581517	-0.28212	4.40851	1.08447	-0.218052	4.2155	1.58049	-0.142469
Rafetus_euphraticus	-5.35	-4.21	10.6	7.68	13.6	-11.3	4.63	5.49	-9.49	-6.22	-10.4	8.26	-5.3	-4.06	10.6	-4.85734	-3.21468	10.1289	-4.37803	-2.34091	9.68545	-3.87643	-1.50919	9.16643	-3.35412	-0.759989	8.54265	-2.82105	-0.0156633	7.91881	-2.30002	0.721473	7.27752	-1.77365	1.43544	6.61456	-1.26292	2.16053	5.95602	-0.76532	2.90879	5.31945	-0.284222	3.62173	4.62175	0.196369	4.35567	3.94433	0.660148
Platysternon_megacephalum	3.89	0.568	-2.32	-5.28	-1.44	3.27	-3.28	0.277	3.21	4.03	3.14	-0.288	3.83	0.519	-2.3	3.52331	0.314036	-2.20428	3.20398	0.138078	-2.08828	2.87553	-0.0159969	-1.97138	2.54278	-0.18066	-1.87819	2.20356	-0.302699	-1.75178	1.88576	-0.359847	-1.55051	1.56595	-0.427902	-1.3522	1.24868	-0.523567	-1.16038	0.925129	-0.632849	-0.989077	0.604582	-0.726391	-0.801242	0.284638	-0.802973	-0.606523	-0.0403752
Pelodiscus_sinensis	-0.793	-0.0735	3.81	2.16	5.27	-7.43	1.42	3.27	-4.99	-1.36	-3.27	3.35	-0.754	-6.42e-05	3.8	-0.670593	0.473814	3.79	-0.578533	0.920435	3.66586	-0.470475	1.28508	3.36647	-0.361315	1.63228	3.04576	-0.252863	1.97254	2.71746	-0.144353	2.28653	2.36451	-0.0310861	2.61656	2.02726	0.0866389	2.93271	1.67841	0.205157	3.24039	1.32259	0.325244	3.53395	0.955268	0.447397	3.82279	0.584953	0.568149
Stigmochelys_pardalis	0.174	8.17	-5.81	-0.81	-6.32	9.14	-0.404	-5.06	5.77	0.479	5.8	-8.41	0.169	8.26	-5.71	0.056414	8.63243	-4.78817	-0.0463545	8.9888	-3.85886	-0.125934	9.32105	-2.91961	-0.212881	9.69207	-1.99482	-0.288687	9.61313	-1.02782	-0.379761	9.39839	-0.0615634	-0.452675	9.4287	0.927188	-0.521075	9.33407	1.91668	-0.570626	8.83449	2.77402	-0.667531	8.32695	3.62609	-0.78003	7.98162	4.55611	-0.883496
Dermochelys_coriacea	3.82	3.3	0.758	-7.68	1.37	2.7	-5.47	-0.72	1.99	4.95	-0.325	-0.179	3.75	3.37	0.783	3.42398	3.61157	0.896228	3.03436	3.75014	0.992113	2.62311	3.82538	1.06769	2.21662	3.90834	1.15668	1.79992	3.94	1.2282	1.3882	3.98036	1.31036	0.976622	4.01	1.40305	0.564246	4.01561	1.48841	0.15393	4.04379	1.58758	-0.260531	4.01098	1.66147	-0.672205	4.01721	1.75279	-1.08774
Chelonoidis_carbonaria	-2.06	3.99	-4.64	2.2	-3.67	6.41	1.66	-3.49	4.84	-2.11	1.37	-5.45	-2.05	4.01	-4.6	-1.88	4.26538	-4.06925	-1.70857	4.42287	-3.50284	-1.54657	4.60343	-2.93314	-1.35261	4.8287	-2.39522	-1.17245	4.90878	-1.81612	-0.990594	4.76808	-1.24616	-0.77612	4.65932	-0.683867	-0.560415	4.6	-0.109059	-0.362772	4.50913	0.470423	-0.166468	4.26835	1.01247	0.0253524	4.08237	1.5583	0.219897
Rhinoclemmys_annulata	2.79	0.00974	5.99	-4.5	1.91	-7.62	-3.83	-0.277	-6.84	3.24	-2.61	5.9	2.77	0.0778	5.97	2.57393	0.486513	5.59786	2.44864	1.01808	5.32161	2.35387	1.5876	5.0716	2.20782	2.10654	4.74637	2.01533	2.59933	4.40683	1.77767	3.00726	3.99027	1.53202	3.33698	3.51504	1.27213	3.5334	2.99426	0.989418	3.78032	2.48935	0.700758	4.0102	1.97961	0.383433	4.26169	1.49746	0.0782444
Emydura_macquarii	-0.0915	6.04	-4.32	0.387	-4.57	7.16	0.459	-4.73	3.61	0.101	3.63	-6.13	-0.0882	6.02	-4.24	-0.0492368	5.74095	-3.76665	-0.00294724	5.51803	-3.26527	0.0499718	5.32992	-2.74977	0.0927516	5.13291	-2.23699	0.110957	4.8913	-1.74216	0.120067	4.64866	-1.24754	0.140497	4.41086	-0.750634	0.169141	4.14859	-0.266785	0.184297	3.86076	0.203011	0.165902	3.58219	0.678587	0.141786	3.26382	1.12725	0.136942
Astrochelys_radiata	5.37	1.2	0.538	-4.19	-0.13	-1.37	-3.18	-0.509	-1.48	5.28	-0.432	-0.663	5.22	1.29	0.584	4.81267	1.5084	0.687008	4.55436	1.84488	0.883247	4.31707	2.19229	1.0955	4.03479	2.52521	1.27761	3.63802	2.75599	1.3604	3.20459	2.93023	1.42511	2.79257	3.12702	1.54361	2.41028	3.35583	1.69292	1.9769	3.51924	1.76231	1.5234	3.65089	1.78	1.06701	3.74117	1.77883	0.604244
Pyxis_arachnoides	-5.38	1.5	1.96	5.77	-0.223	-1.12	4.53	-0.929	-1.54	-5.72	-1.06	0.407	-5.34	1.55	1.98	-4.88964	1.82587	2.04862	-4.39667	2.03222	2.0637	-3.94345	2.31462	2.13366	-3.56228	2.65772	2.24693	-3.15866	2.99741	2.33348	-2.67075	3.2257	2.36	-2.15852	3.39074	2.37025	-1.66678	3.59664	2.45	-1.17845	3.80462	2.50231	-0.652025	3.90557	2.47443	-0.126765	3.96686	2.41686	0.400713
Phrynops_tuberosus	-2.18	-3.44	15.9	1.76	6.58	-16.8	0.998	1.29	-12.8	-1.75	-9.27	12.6	-2.15	-3.35	15.6	-1.99564	-2.71777	14.5043	-1.88336	-1.93686	13.5168	-1.83	-1.03516	12.6463	-1.81105	-0.0879149	11.821	-1.78343	0.830905	10.9685	-1.70439	1.79299	10.1439	-1.6103	2.67726	9.23274	-1.48953	3.37141	8.17436	-1.43	3.99054	7.06921	-1.37784	4.74296	6.04272	-1.20951	5.38781	4.96073	-0.985317
Podocnemis_vogli	3.22	12.6	5	-1.9	-15.1	-5.17	-4.22	-11	-4.9	-1.42	14.7	3.23	3.28	12.5	5.01	3.53676	11.4324	4.91986	3.79798	10.3681	4.8084	4.11276	9.31171	4.75345	4.45813	8.2645	4.71297	4.78618	7.21147	4.67	5.06053	6.14733	4.57947	5.26433	5.0801	4.38654	5.46742	4.01789	4.16258	5.61368	2.95533	3.90159	5.65	1.88388	3.63924	5.64955	0.808337	3.39387	5.56185
Lissemys_punctata	-1.75	3.06	-2.64	5.01	-1.78	5.85	4.53	-2.26	4.89	-2.68	1.12	-4.13	-1.69	3.15	-2.56	-1.44672	3.24665	-2.22675	-1.19222	3.32365	-1.87491	-0.936626	3.36018	-1.51819	-0.681952	3.36568	-1.15889	-0.433721	3.36682	-0.797193	-0.186006	3.37	-0.43247	0.0587961	3.39	-0.0659495	0.310848	3.34874	0.293888	0.563439	3.2961	0.651927	0.816452	3.21995	1.00483	1.07413	3.14293	1.35266	1.32405
Chelodina_oblonga	-5.07	7.54	-4.98	6.22	-2.73	7.58	4.68	-4.01	4.07	-4.22	3.75	-5.9	-5.01	7.54	-4.88	-4.60962	7.31975	-4.34943	-4.22572	7.17905	-3.78334	-3.84828	7.11517	-3.19621	-3.46245	7.00748	-2.62159	-3.07434	6.89145	-2.0496	-2.67737	6.70825	-1.50374	-2.27262	6.41649	-1.01147	-1.86687	6.11073	-0.529476	-1.4637	5.80475	-0.0482447	-1.06392	5.5237	0.453554	-0.654948	5.25322	0.950849	-0.234129
Mesoclemmys_dahli	-5.14	0.523	5.94	6.53	5.34	-6.29	4.49	3	-5.53	-5.22	-2.85	3.16	-5.09	0.58	5.91	-4.64883	0.937756	5.59707	-4.19694	1.27306	5.27355	-3.75425	1.65575	5.01455	-3.30443	2.05846	4.77866	-2.87331	2.47669	4.53748	-2.46079	2.90401	4.2804	-2.02222	3.30822	4.03133	-1.56646	3.63354	3.70646	-1.13245	3.98004	3.36996	-0.710965	4.28683	2.98317	-0.278663	4.57679	2.59534	0.159466
Chersina_angulata	1.95	-0.58	3.85	-1.57	3.41	-4.69	-1.1	2.3	-4.03	1.76	-2.2	2.76	1.93	-0.477	3.85	1.79422	-0.0771947	3.72229	1.65799	0.324845	3.60199	1.52199	0.729449	3.48799	1.45195	1.1605	3.48805	1.38309	1.58727	3.43964	1.2651	1.95449	3.22531	1.13869	2.28262	2.96172	0.992402	2.6238	2.72772	0.838749	2.99107	2.54536	0.674198	3.30845	2.28866	0.509346	3.58109	1.98855	0.346878
Gopherus_polyphemus	-3.65	-0.928	6.87	3.85	0.977	-7.8	3.06	-0.143	-6.45	-3.65	-4.68	5.51	-3.57	-0.881	6.73	-3.23553	-0.349687	6.36961	-2.97041	0.312937	6.1852	-2.74091	0.994691	6.02069	-2.51501	1.66999	5.83376	-2.18039	2.17961	5.41847	-1.85387	2.51818	4.86182	-1.51279	2.98617	4.40348	-1.16584	3.43093	3.92553	-0.830596	3.7918	3.37579	-0.516684	4.04918	2.75786	-0.210426	4.29543	2.14457	0.165559
Sternotherus_odoratus	-2.09	3.62	-2.23	2.73	-2.27	3.44	1.88	-2.18	1.39	-1.45	1.47	-3.05	-2.06	3.64	-2.13	-1.9177	3.62508	-1.79541	-1.76171	3.56869	-1.46909	-1.60636	3.49477	-1.14591	-1.43826	3.4213	-0.829034	-1.27406	3.35851	-0.51307	-1.10509	3.26306	-0.204151	-0.936898	3.14293	0.0981747	-0.778583	3.02433	0.406789	-0.620781	2.88984	0.708745	-0.453121	2.75058	1.00268	-0.270054	2.60187	1.2822	-0.0807131
Graptemys_geographica	-4.64	4.12	-4.68	5.88	-1.42	9.14	5.41	-3.52	6.49	-4.1	0.874	-6.07	-4.59	4.17	-4.51	-4.36744	4.27128	-3.88943	-4.20647	4.56509	-3.32236	-4.03275	4.8487	-2.74679	-3.81242	5.05379	-2.15231	-3.52282	5.14388	-1.55953	-3.18728	5.14341	-0.983674	-2.81463	4.97799	-0.460821	-2.44287	4.84072	0.0757697	-2.0982	4.76117	0.641521	-1.73494	4.65831	1.1909	-1.34986	4.53397	1.71822	-0.975937
Clemmys_guttata	3.83	2.8	-1.14	-4.97	-0.79	2.43	-3.99	-1.01	1.83	3.81	1.05	-1.58	3.73	2.84	-1.09	3.39743	2.92592	-0.913897	3.05235	2.97576	-0.742447	2.70652	3.017	-0.570109	2.37247	3.09195	-0.386456	2.03337	3.13	-0.201835	1.69676	3.17703	-0.0135527	1.35557	3.17111	0.16888	1.0121	3.15202	0.347748	0.671554	3.13	0.532195	0.328585	3.11813	0.713614	-0.0231908	3.09	0.873437	-0.379874
Deirochelys_reticularia	1.87	5.34	-8.13	-1.27	-4.04	8.82	-1.09	-5.44	6.6	1.79	1.88	-9.54	1.84	5.34	-8.04	1.68899	5.32	-7.28496	1.56876	5.42248	-6.53133	1.4623	5.6513	-5.802	1.36594	5.90946	-5.08161	1.26002	6.12996	-4.35015	1.14996	6.29004	-3.60475	1.01567	6.35	-2.84837	0.910955	6.32198	-2.08559	0.817415	6.20985	-1.32938	0.721141	6.03117	-0.584615	0.610843	5.84015	0.154915	0.480825
Malaclemys_terrapin	3.19	0.509	2.87	-3.94	2.66	-2.25	-3.29	1.41	-2.47	2.9	-1.24	1.85	3.16	0.576	2.89	2.94341	0.862065	2.83736	2.73114	1.15329	2.79	2.51825	1.4501	2.74165	2.29767	1.73727	2.66753	2.07307	2.02129	2.60436	1.78799	2.18067	2.44866	1.54681	2.42399	2.3484	1.29931	2.67069	2.23466	1.03764	2.88157	2.08843	0.778332	3.04314	1.88745	0.534169	3.02594	1.61376	0.270655
Kinosternon_baurii	5.5	0.927	1.82	-3.63	0.492	-1.91	-2.66	-0.15	-1.77	5.09	-0.192	1.36	5.47	1.03	1.82	5.19138	1.28254	1.74785	4.88454	1.49859	1.66656	4.56299	1.69201	1.579	4.23145	1.86428	1.48343	3.89111	2.02323	1.39757	3.54057	2.1407	1.2893	3.20093	2.27338	1.17216	2.86022	2.39903	1.04462	2.51745	2.51524	0.912503	2.16217	2.60142	0.79051	1.7978	2.66767	0.682723	1.43032
Emydoidea_blandingii	-3.25	4.29	-3.9	2.68	-3.25	5.65	2.28	-3.38	4.67	-3.19	3.62	-4.33	-3.22	4.35	-3.83	-3.05777	4.50306	-3.35941	-2.85378	4.48749	-2.88006	-2.65327	4.55382	-2.39891	-2.43445	4.58	-1.9216	-2.22363	4.58	-1.43973	-2.01339	4.55068	-0.95933	-1.82748	4.46249	-0.476706	-1.6215	4.2972	-0.0237102	-1.39838	4.11892	0.415554	-1.16149	3.95099	0.853748	-0.927526	3.75647	1.28236	-0.695296
Eretmochelys_imbricata	-19.5	0.301	-57.9	17	-1.31	-57	10.2	2.86	-54.4	-17.6	7.01	-53.8	-19.3	0.19	-58	-18.0512	-0.0724641	-58.2	-16.7978	-0.306113	-58.4	-15.6195	-0.699099	-58.6805	-14.3573	-0.842693	-58.6	-13.0888	-1.04667	-58.7	-11.8843	-1.33313	-58.9	-10.612	-1.5088	-59	-9.33285	-1.62271	-59.1	-8.06956	-1.84744	-59.2	-6.76752	-1.88946	-59.2	-5.4888	-2.03711	-59.1	-4.19254
Geochelone_elegans	-1.17	4.14	-1.81	0.592	-1.9	2.84	0.417	-1.5	2.12	-1.12	2.8	-2.85	-1.18	4.17	-1.79	-1.13688	4.25624	-1.43753	-1.04402	4.32	-1.08004	-0.958891	4.36011	-0.717442	-0.888119	4.43	-0.353523	-0.787775	4.40778	0.0101791	-0.674043	4.28507	0.346364	-0.581591	4.22926	0.700709	-0.497626	4.14485	1.05544	-0.396533	4.0035	1.39083	-0.301914	3.81152	1.70119	-0.227286	3.63	2.0051	-0.164807
Chelonia_mydas	34.5	-7.45	-113	31.9	31.6	-211	38.6	27	-191	44.3	7.28	-115	34.1	-7.69	-113	32.3447	-8.24631	-116.184	30.9026	-8.31684	-119.658	29.6522	-7.9961	-123.239	28.8876	-7.34652	-127	28.3365	-6.25767	-130.635	27.6639	-5.32419	-134.361	27.0069	-4.23305	-137.931	26.4296	-3.28922	-141.704	25.9736	-2.15456	-145.264	25.4993	-1.078	-149.007	25.1	0.197267	-152.697	24.7
Actinemys_marmorata	4.84	1.11	2.6	-3.63	1.88	-2.31	-2.97	1.14	-2.07	4.84	-0.266	2.28	4.79	1.21	2.59	4.54775	1.44919	2.48388	4.28873	1.66127	2.35828	4.04131	1.89869	2.25565	3.77634	2.10525	2.13317	3.52279	2.32041	2.00299	3.23943	2.47692	1.85308	2.94401	2.602	1.69601	2.63785	2.67886	1.52893	2.33303	2.78109	1.37152	2.03053	2.87484	1.20527	1.71989	2.95639	1.04721	1.41384
Terrapene_carolina	3.56	0.996	3.33	-3.67	0.26	-4.23	-3.09	0.249	-3.47	3.51	0.398	3.16	3.52	1.01	3.29	3.24208	1.29479	3.09208	3.00738	1.65419	2.9479	2.78291	2.01278	2.77861	2.54512	2.35981	2.60512	2.28064	2.66936	2.40451	1.99558	2.93962	2.17798	1.67508	3.09746	1.90194	1.37392	3.27505	1.61093	1.07165	3.44917	1.31894	0.765025	3.59116	1.01392	0.452523	3.69821	0.701523	0.13939
Testudo_graeca	4.7	4.98	-2.1	-6.73	-3.46	5.68	-4.83	-2.72	4.32	4.63	1.85	-3.43	4.64	5.05	-2.01	4.24461	5.24135	-1.48327	3.76467	5.21	-0.992759	3.28667	5.25852	-0.494489	2.81374	5.33542	0.00348483	2.4461	5.63543	0.507466	2.04201	5.84911	1.02741	1.58259	5.8802	1.53721	1.11191	5.84399	2.04409	0.638652	5.85788	2.54962	0.145231	5.73495	3.00009	-0.36822	5.51826	3.40641	-0.858094
Hydromedusa_tectifera	-7.46	0.882	2.33	8.9	2.28	-3.05	5.82	1.11	-2.59	-6.53	-0.642	0.975	-7.36	0.959	2.36	-6.775	1.27292	2.39042	-6.17789	1.56605	2.38899	-5.58054	1.86152	2.37	-4.98294	2.14902	2.32823	-4.41208	2.48738	2.33	-3.83916	2.82911	2.31565	-3.24832	3.13345	2.27044	-2.63171	3.36949	2.18034	-1.99752	3.51674	2.0455	-1.36868	3.701	1.919	-0.736997	3.87147	1.7889	-0.0974384
Orlitia_borneensis	-11	5.98	-3.18	15.3	-3.03	6.99	11.8	-4.74	3.51	-10.1	1.02	-5.73	-10.9	6.07	-3.11	-10.0405	6.36496	-2.51026	-9.08287	6.40187	-1.98143	-8.22621	6.66444	-1.38414	-7.334	6.88333	-0.784463	-6.41837	7.02616	-0.197716	-5.50065	7.1599	0.387587	-4.56235	7.22134	0.939642	-3.58263	7.24174	1.41869	-2.62504	7.29342	1.94577	-1.65663	7.19386	2.45072	-0.66166	7.0174	2.8752	0.348032
Cuora_amboinensis	-4.37	4.95	-3.96	7.39	-2.67	7.79	6.34	-4.66	5.71	-5.24	1.14	-6.09	-4.28	4.96	-3.87	-3.80597	5.04289	-3.34886	-3.38326	5.23837	-2.80407	-2.97222	5.42741	-2.24481	-2.57327	5.6164	-1.67687	-2.1695	5.7835	-1.10548	-1.73386	5.86692	-0.540705	-1.26381	5.88	0.00390312	-0.791118	5.88	0.54592	-0.313631	5.86329	1.08377	0.16423	5.82202	1.61984	0.646	5.71223	2.14255	1.12843
Notochelys_platynota	8.88	5.91	-4.75	-11.4	-5.25	8.15	-8.14	-7.05	3.98	8.55	0.674	-7.14	8.74	6.07	-4.61	8.01752	6.24921	-3.93673	7.28343	6.30627	-3.27268	6.56192	6.4672	-2.59121	5.88849	6.68403	-1.87715	5.17225	6.65494	-1.17978	4.41677	6.40862	-0.5686	3.63673	6.12735	-0.001489	2.8633	5.97666	0.621363	2.09888	5.77086	1.23198	1.30091	5.48364	1.76363	0.511195	5.21457	2.32213	-0.233442
Cyclemys_dentata	-4.79	0.512	6.23	3.49	4.75	-8.72	2.36	2.95	-7.31	-4.85	-1.62	5.54	-4.74	0.632	6.16	-4.46477	1.0717	5.72892	-4.20209	1.60558	5.39954	-3.92115	2.13712	5.08115	-3.63319	2.69363	4.80319	-3.33427	3.2436	4.5273	-3.02119	3.70409	4.12767	-2.7484	4.1074	3.6468	-2.47573	4.48427	3.14532	-2.15713	4.84287	2.65549	-1.83635	5.16598	2.1457	-1.52058	5.47363	1.62376	-1.20461
Batagur_dhongoka	1.19	5.44	-9.08	-0.814	-0.838	8.63	-0.269	-3.39	4.42	1.34	2.45	-10.4	1.18	5.52	-8.88	1.12776	5.73672	-8.2476	1.06577	5.92058	-7.60558	1.0134	6.06101	-6.95222	0.950698	6.1673	-6.29333	0.888757	6.22924	-5.62832	0.826682	6.25	-4.96116	0.761958	6.22453	-4.2941	0.69595	6.16493	-3.6295	0.62903	6.06187	-2.9703	0.562224	5.93092	-2.31605	0.496064	5.76108	-1.67064	0.431152
Vijayachelys_silvatica	-2.96	3.43	-1.29	5.47	-3.29	3	3.72	-3.25	1.34	-2.96	1.29	-2.93	-2.86	3.41	-1.19	-2.56695	3.37917	-0.889481	-2.25821	3.30964	-0.604279	-1.95473	3.23904	-0.313355	-1.64786	3.16337	-0.028912	-1.33606	3.05831	0.241437	-1.02181	2.92105	0.494017	-0.703955	2.75407	0.722894	-0.380371	2.57659	0.935582	-0.0595161	2.38238	1.13762	0.259746	2.17773	1.33227	0.579462	1.96556	1.51755	0.893644
Melanochelys_trijuga	-1.71	7.04	-4.21	1.89	-4.57	7.34	1.64	-5.27	4.8	-1.55	4.84	-5.6	-1.7	7.06	-4.16	-1.57005	6.85008	-3.57014	-1.48766	6.81234	-2.93897	-1.41276	6.81	-2.29758	-1.32679	6.8	-1.65794	-1.24184	6.78	-1.01842	-1.13758	6.71758	-0.385925	-1.01498	6.48796	0.198663	-0.87309	6.16915	0.741956	-0.725559	5.84844	1.28311	-0.586003	5.50779	1.81369	-0.4459	5.16131	2.34115	-0.314634
Caretta_caretta	-16.1	4.88	-96.1	17.7	-17	-87.3	11.3	-17.7	-96.3	-14.9	-3.05	-106	-15.9	4.97	-95.7	-15.1948	5.35157	-94.3896	-14.216	5.3424	-93.216	-13.1083	5.15625	-92.1542	-12.0124	4.96686	-91.1562	-10.7978	4.48865	-90.6	-9.47165	3.88482	-90.264	-8.16395	3.31915	-89.7435	-7.0001	2.5574	-89.1067	-5.80211	1.79105	-88.5789	-4.54032	1.24016	-87.8668	-3.4202	0.286964	-87.7451	-2.21771
Dogania_subplana	4.27	1.51	1.27	-13.2	0.0365	0.154	-8.26	-0.32	-0.19	5.25	-0.226	-0.702	4	1.57	1.33	3.44686	1.80294	1.55294	2.92009	2.06413	1.80954	2.37563	2.30175	2.05175	1.77558	2.45349	2.21349	1.14327	2.52	2.29348	0.502509	2.53	2.32699	-0.138645	2.52	2.35424	-0.779292	2.50006	2.37997	-1.42074	2.48	2.38563	-2.06217	2.46831	2.4	-2.70346	2.44	2.4	-3.34479
Heosemys_spinosa	-2.63	-2.97	6.95	3.25	4.86	-6.86	2.96	5.88	-4.94	-2.59	-0.938	8.25	-2.62	-2.94	6.89	-2.49021	-2.78	6.27144	-2.36583	-2.89625	5.64124	-2.24785	-3.12429	5.02927	-2.11846	-3.33231	4.41308	-1.98682	-3.53318	3.7941	-1.82376	-3.62312	3.1588	-1.62868	-3.58066	2.53338	-1.46779	-3.58	1.89115	-1.28879	-3.4944	1.26077	-1.08225	-3.39613	0.638504	-0.861006	-3.2469	0.0332131	-0.634631
Chelus_fimbriata	-1.49	7.49	-5.91	1.16	-5.15	9.38	0.746	-5.06	6.02	-1.66	3.19	-9.53	-1.47	7.49	-5.81	-1.45	7.15649	-5.11639	-1.3295	6.60799	-4.58648	-1.25005	6.27016	-3.89027	-1.13339	5.93016	-3.19863	-1.01765	5.58592	-2.50888	-0.934733	5.21183	-1.86199	-0.849374	5.00312	-1.12843	-0.746051	4.63448	-0.457374	-0.608232	4.33353	0.245424	-0.439	3.90144	0.81109	-0.458294	3.88043	1.54706	-0.358835
Macrochelys_temminckii	-2.83	-7.61	-69.4	38.6	6.55	-93	27.2	12.7	-85.2	-2.63	9.22	-67.5	-2.5	-7.79	-69.7	-1.03658	-8.33477	-70.7465	0.414772	-8.93604	-71.7868	1.85224	-9.50667	-72.8611	3.43679	-9.41122	-73.7985	4.96988	-9.25	-74.6999	6.57361	-9.45498	-75.6374	8.14639	-9.53	-76.647	9.68502	-9.51	-77.7146	11.2166	-9.2142	-78.7	12.7234	-8.73312	-79.4078	14.2235	-8.64	-80.5078	15.7931
Malacochersus_tornieri	5.38	1.9	0.627	-6.96	-0.279	0.394	-5.86	-0.313	0.349	5.93	0.478	-0.58	5.26	1.91	0.65	4.81143	1.95805	0.726713	4.3727	2.02122	0.817141	3.92122	2.04	0.885288	3.4752	2.08451	0.974863	3.03577	2.14038	1.08077	2.58291	2.14026	1.13974	2.12971	2.09634	1.17366	1.67647	2.04241	1.19759	1.22338	1.99206	1.22	0.770178	1.92608	1.22	0.31554	1.88001	1.24	-0.138959
Malayemys_subtrijuga	4	-1.52	2.57	-4.83	1.36	-2.84	-3.78	-0.261	-3.13	3.46	-3.43	0.708	3.92	-1.47	2.57	3.59378	-1.21984	2.52394	3.28136	-0.955642	2.44896	2.99315	-0.659933	2.41	2.72547	-0.340249	2.39616	2.45497	-0.0238802	2.36437	2.16759	0.274167	2.31552	1.85811	0.54024	2.2327	1.53078	0.761191	2.10605	1.20098	0.982617	1.98133	0.865398	1.20684	1.87544	0.52604	1.40009	1.73239	0.190904
Indotestudo_elongata	-11.4	-1.15	11	10.3	0.0187	-9.76	6.19	-1.29	-6.18	-10.6	-4.83	8.21	-11.3	-0.969	11	-10.7282	0.0969468	10.6282	-9.80287	0.75117	9.96116	-8.85532	1.39168	9.30199	-7.99073	2.26688	8.80116	-7.17048	3.24661	8.44468	-6.26881	4.06925	7.97709	-5.32685	4.82169	7.42269	-4.43674	5.67105	6.91856	-3.46102	6.25686	6.24208	-2.44249	6.59643	5.46071	-1.44855	6.97023	4.66465	-0.471326
Pangshura_tentoria	5.03	5.35	-5.78	-6.81	-2.14	10.9	-5.63	-3.78	8.05	5.46	2.2	-7.56	5.01	5.45	-5.68	4.59719	5.59188	-4.98484	4.21454	5.79312	-4.27908	3.85584	6.02011	-3.56169	3.51741	6.30259	-2.85482	3.13466	6.5312	-2.1564	2.68243	6.56	-1.46037	2.2552	6.65827	-0.759518	1.82814	6.80465	-0.0599593	1.40217	6.80554	0.652976	0.991373	6.56767	1.32516	0.585686	6.55	2.05144	0.164729
Morenia_petersi	-2.29	5.98	-3.49	3.83	-4.18	6.99	3.32	-4.28	4.83	-2.16	3.22	-4.49	-2.26	5.95	-3.41	-2.04969	5.66969	-2.91446	-1.79161	5.48232	-2.4009	-1.50529	5.43306	-1.86752	-1.26197	5.39479	-1.31112	-1.03958	5.33792	-0.746526	-0.816709	5.28136	-0.182186	-0.560593	5.15895	0.356918	-0.299307	5.00622	0.885708	-0.0461921	4.88072	1.42427	0.215627	4.69096	1.94035	0.478781	4.47768	2.44618	0.727551
Geoemyda_spengleri	-3.93	2.9	-0.101	4.19	0.558	1.5	3.4	-0.423	0.865	-4.17	0.994	-0.831	-3.85	2.95	-0.0648	-3.56387	3.0071	0.045551	-3.27878	3.06921	0.156051	-2.9946	3.14885	0.270046	-2.70339	3.20665	0.379644	-2.40861	3.24767	0.487022	-2.10395	3.24	0.571101	-1.80365	3.19	0.642643	-1.50903	3.23	0.742292	-1.20554	3.24069	0.822753	-0.895836	3.23	0.885968	-0.586516	3.20247	0.946047	-0.284975
Manouria_impressa	12.2	2.63	1.89	-13.5	-0.669	-1.16	-9.85	-3.55	-1.98	13.1	-2.95	-0.263	12.2	2.66	1.9	11.2104	2.80688	1.83	10.3088	3.17472	1.88912	9.40803	3.60198	1.998	8.64832	4.22807	2.18723	7.85903	4.80488	2.40122	6.88138	4.91	2.42696	5.88571	5.05486	2.44	4.89946	5.26123	2.47	3.90087	5.37324	2.41676	2.89692	5.44846	2.41	1.8939	5.54	2.41744	0.892146
Platemys_platycephala	-2.75	5.05	-3.16	6.73	-3.91	4.58	5.56	-3.76	2.91	-2.88	3.39	-4.27	-2.71	5.01	-3.1	-2.39564	4.80673	-2.70454	-2.06395	4.56263	-2.34772	-1.73183	4.37304	-1.95759	-1.39847	4.21282	-1.55608	-1.05666	4.06846	-1.15577	-0.713192	3.89817	-0.767642	-0.354329	3.68109	-0.426221	-2.27216e-05	3.39526	-0.126595	0.353276	3.12299	0.187158	0.694404	2.85286	0.515047	1.01043	2.61366	0.888965	1.32279
Trachemys_scripta	3.38	5.52	-8.67	-1.72	-2.4	9.59	-1.55	-4.1	6.65	3.15	1.88	-10.1	3.36	5.59	-8.57	3.23833	5.86167	-7.87334	3.08896	5.89827	-7.1362	2.91282	5.93239	-6.41367	2.70559	5.9548	-5.68234	2.50785	5.98	-4.948	2.31118	5.98	-4.21355	2.10961	5.9468	-3.48204	1.89848	5.88899	-2.75493	1.69073	5.77024	-2.03294	1.51931	5.62908	-1.30724	1.33683	5.49683	-0.584295	1.09808
Glyptemys_insculpta	-7.79	3.57	-1.88	9.04	-0.872	1.58	7.01	-1.97	0.425	-8.19	1	-3.38	-7.73	3.63	-1.81	-7.12837	3.76	-1.52577	-6.4948	3.7539	-1.2861	-6.03966	4.07517	-0.90056	-5.46765	4.27309	-0.580671	-4.8704	4.4243	-0.28063	-4.25005	4.52058	-0.00659587	-3.6189	4.62	0.237331	-2.9658	4.51477	0.3636	-2.29716	4.47	0.50833	-1.63075	4.43	0.661604	-0.977283	4.40301	0.864472	-0.331034
Chrysemys_picta	1.93	-2.04	6.06	-1.44	5.28	-4.27	-1.64	3.75	-4.51	1.84	-4.24	4.81	1.91	-1.95	6	1.82162	-1.53207	5.76603	1.72473	-1.10911	5.54456	1.63393	-0.667618	5.36785	1.54863	-0.222888	5.18726	1.45555	0.213185	4.99109	1.34939	0.633233	4.76817	1.24169	1.03444	4.51393	1.12493	1.41521	4.23315	1.00598	1.77755	3.92995	0.888998	2.14474	3.63105	0.769974	2.48691	3.30571	0.649214
Proganochelys_quenstedti	-22	7.79	20.5	27.5	23.3	-0.383	26.4	7.99	-12.7	-24	-8.39	9.88	-20.8	8.4	20.5	-19.2225	9.16263	19.8	-17.5424	9.9478	19.3475	-15.7742	10.5086	18.8914	-14.0836	11.211	18.5	-12.3542	11.9153	18.0847	-10.647	12.651	17.549	-8.92926	13.2	16.951	-7.24444	13.4	16.0254	-5.60064	13.6367	15.0633	-3.83364	14.2242	14.5758	-2.03484	14.5659	13.9683	-0.235477
Proterochersis_robusta	-1.83	9.43	-72.5	-1.12	6.69	-36.3	-0.968	-2.59	-40.3	-1.36	0.813	-72.4	-1.84	9.59	-72.2	-1.83261	10.1322	-70.9521	-1.78848	11.3303	-70.1545	-1.75	12.2615	-69.0385	-1.65361	12.9639	-67.8361	-1.56869	13.5566	-66.5303	-1.47772	14.0456	-65.2544	-1.44	14.8678	-64.0643	-1.41	15.5532	-62.7937	-1.38	16.1347	-61.496	-1.37	16.3	-60.0692	-1.34872	16.1064	-58.6743	-1.27551
Plesiochelys_bigleri	171	21.4	-21.5	-257	-12.9	24.9	-198	-32.3	-22.2	160	-11	-91.6	169	22.7	-19	155.546	25.9725	-11.8096	141.545	28.3455	-5.38431	127.926	30.9507	1.58581	114.304	32.9101	8.53098	100.948	34.6282	16.0335	86.7448	35.6452	22.4421	72.1493	36.6697	27.8574	56.8516	36.8845	30.9619	41.3953	36.0663	33.0009	28.2895	34.3553	33.6722	14.211	33.6194	38.1824	-0.819639
[truncated: 143 more columns]
