# Supplementary material for: The ecomorphology of the shell of extant turtles and its applications for fossil turtles
Source: PeerJ. 2020 Dec 22;8:e10490. doi: 10.7717/peerj.10490 (PMC7761203; doi:10.7717/peerj.10490)
Supplement: Supplemental Information 18 — an sheet for each SET (SET1-SET4) is presented. These data were used to conduct statistical analyses. [file peerj-08-10490-s018.xlsx]

## Sheet: SET1
	V1	V2	V3	V4	V5	V6	V7	V8	V9	V10	V11	V12	V13	V14	V15	V16	V17	V18	V19	V20	V21	V22	V23	V24	V25	V26	V27	V28	V29	V30	V31	V32	V33	V34	V35	V36	V37	V38	V39	V40	V41	V42	V43	V44	V45	V46	V47	V48	V49
Dermatemys_mawi	-0.353	-2.16	11.4	-0.478	3.16	-12.3	-0.581	0.367	-8.6	-0.212	-5.78	9.69	-6	0.381	-5.74	-5.19	-2.62	6.42	5.28	-0.0342	-5.82	5.46	-3.33	6.11	-7.36	-2.75	-0.0311	6.76	-3.06	-0.0666	0.0012	-2.08	11.4	0.824989	-2.2522	11.1675	1.62238	-2.52815	10.9398	2.38802	-2.82009	10.6332	3.14899	-3.06732	10.288	3.89849	-3.15952	9.8491	4.60868
Staurotypus_triporcatus	-8.66	3	-2.78	9.85	-0.297	5.46	5.83	-2.85	2.4	-6.37	-0.134	-2.84	5.02	0.266	-3.31	-1.28	1.21	-6.17	0.142	-3.1	5.6	-6.15	-2.07	2.91	1.85	0.201	-5.09	-3.17	-3.2	4.55	-8.72	2.96	-2.7	-9.03043	2.62928	-2.11885	-9.28421	2.24159	-1.54738	-9.48986	1.76028	-1.03024	-9.62	1.16767	-0.624484	-9.5665	0.577384	-0.192335	-9.38723
Claudius_angustatus	4.86	0.805	1.63	-4.02	2.21	-1.24	-2.56	-0.39	-1.16	3.44	-0.853	0.823	-1.98	0.105	2.03	-0.257	-0.399	2.64	0.147	0.978	-3.03	1.81	0.657	-2.42	-1.09	-0.216	2.24	0.904	0.749	-2.66	4.87	0.809	1.58	4.92949	0.825899	1.25253	4.97146	0.797666	0.921767	4.99	0.717995	0.592892	4.90677	0.63516	0.277801	4.7882	0.60409	-0.0362438	4.65024
Sacalia_quadriocellata	2.82	-0.771	1.6	-3.25	1.37	-2.19	-2.41	0.471	-2.06	2.4	-2.04	0.646	-2.27	-1.08	0.824	0.249	-2.09	1.74	0.537	0.937	-2.64	2.67	-0.439	-1.12	-1.24	-1.91	1.29	1.8	0.0703	-2.28	2.87	-0.767	1.56	3.05095	-0.764905	1.32905	3.19275	-0.762275	1.07176	3.30081	-0.755797	0.797807	3.37266	-0.727937	0.516117	3.42	-0.674622	0.239506	3.43706
Mauremys_reevesii	-5.4	3.07	0.0947	6.61	2.32	1.8	6.1	0.0254	0.955	-5.29	0.573	-0.833	2.6	2.32	-2.48	-2.38	2.66	-3.26	1.61	0.0206	3.72	-3.22	0.131	3	0.572	1.8	-3.23	-0.573	-0.786	3.43	-5.41	3	0.189	-5.45849	2.73056	0.549817	-5.48	2.45131	0.906299	-5.54	2.20438	1.2758	-5.53312	1.95936	1.6544	-5.43556	1.70556	2.00555	-5.28972
Apalone_mutica	3.69	3.78	-4.26	-1.98	-1.87	5.24	0.0678	-0.765	2.32	3.65	2.42	-4.9	4.05	-0.455	2.52	6.23	0.928	-1.52	-2.81	1.15	-0.117	-0.621	2.67	-4.48	5.76	0.0322	0.37	-2.15	2	-2.89	3.62	3.8	-4.27	3.117	3.83	-4.329	2.61654	3.81776	-4.41224	2.13421	3.69903	-4.51	1.63651	3.6173	-4.55	1.1422	3.51073	-4.52037	0.663902
Pelusios_situatus	-14.3	3.55	-5.17	16.7	-2.44	5.05	13.3	-5.73	2.58	-15.3	0.897	-6.86	9.47	0.674	-7.5	-6.87	2.13	-12.8	2.38	-6.51	8.52	-13	-4.87	1.82	2.76	-0.0553	-11.9	-4.82	-8.1	5.88	-14.4	3.44	-5.02	-15.0785	2.82368	-4.16014	-15.4	2.10692	-3.20647	-15.7	1.34459	-2.29247	-15.9	0.518018	-1.40002	-15.8052	-0.421344	-0.590981	-15.6868
Elseya_novaeguineae	-5.68	4.71	-2.78	6.36	-4.36	4.65	4.44	-4.58	1.94	-5.87	2.19	-5.16	5.51	0.674	-0.839	-1.35	4.32	-4.04	-0.978	-3.57	4.32	-6.08	1.11	-0.192	2.44	2.68	-3.97	-4.73	-2.33	2.04	-5.81	4.61	-2.69	-6.17188	4.25406	-2.39723	-6.54641	3.91937	-2.09203	-6.80501	3.47748	-1.80623	-7.00124	3.0219	-1.48314	-7.11986	2.54151	-1.16096	-7.09202
Chelydra_serpentina	1.23	0.45	-12.2	0.877	-0.244	11.5	0.928	3.54	6.72	1.33	6.35	-12.6	-9.15	4.3	2.88	-9.12	6.78	-3.44	11.5	4.92	2.44	11.2	6.51	-2.86	-9.8	6.31	-1.47	11.8	6.05	-1.07	1.32	0.46	-12.2	2.36622	0.856733	-12.1	3.36774	1.37734	-12	4.4165	1.83354	-12.0471	5.41845	2.31845	-12.2	6.31672	2.98836	-12.0833	7.27708
Carettochelys_insculpta	-12.1	-19.1	30.5	7.8	13.5	59.9	-1.01	10	54.1	-20.5	-14.4	30.1	-9.1	-2.08	57.1	-21.1	-12	48.9	0.0254	7.77	38.8	-9.15	0.424	26.3	-18.2	-6.58	53.3	-6.65	5.55	30.3	-12.1	-19	30.3	-11.8501	-17.9501	28.9003	-11.9	-16.6561	27.7561	-11.773	-15.373	26.8	-10.8177	-14.2177	26.1177	-9.85254	-12.9751	25.4751	-9.10908
Emys_orbicularis	-4.08	3.08	0.289	6.5	0.805	1.08	5.86	-0.376	0.292	-4.1	1.06	-1.09	2.37	2.59	-2.62	-0.8	2.81	-3	1.06	-0.766	2.89	-1.85	-0.45	2.24	0.493	2.09	-3.13	-0.619	-1.07	2.13	-4.09	3.02	0.361	-4.14242	2.75546	0.668208	-4.18505	2.47968	0.967352	-4.21	2.18956	1.25363	-4.18208	1.85834	1.48375	-4.11355	1.53419	1.71936	-3.97072
Pelomedusa_subrufa	-5.02	2.3	-0.583	5.4	-0.375	2.69	3.53	-0.791	1.63	-4.96	1.39	-0.808	2.23	1.47	-1.54	-1.38	2.37	-2.69	0.0146	-0.829	3.97	-3.85	0.159	2.97	0.17	0.883	-2.73	-2.17	-1.39	3.26	-5.03	2.26	-0.537	-5.24098	2.14935	-0.19944	-5.42519	1.99481	0.139857	-5.55393	1.81214	0.48473	-5.62	1.62444	0.849395	-5.61552	1.44209	1.22135	-5.55097
Psammobates_tentorius	-0.19	3.96	-3.74	-0.21	-2.45	3.61	-0.205	-2.14	2.17	-0.329	2.14	-5.05	3.18	-0.628	0.544	2.28	1.92	-3.88	-3.49	-0.417	0.697	-2.91	1.89	-3.81	3.41	0.312	-2	-3.87	0.465	-1.87	-0.227	3.96	-3.74	-0.513733	3.97	-3.67573	-0.854604	3.99728	-3.89544	-1.1934	3.8483	-4.07	-1.5244	3.7076	-4.0272	-1.86499	3.63167	-4.24249	-2.25067
Homopus_femoralis	-0.555	5.02	-2.47	1.44	-1.58	2.96	1.09	-0.963	2.12	-0.551	3.58	-3.4	3.42	1.17	0.716	1.99	3.4	-2.5	-2.07	0.365	1.81	-2.43	2.4	-1.75	3	2.2	-1.32	-2.69	1.31	-0.308	-0.599	5.01	-2.47	-0.891335	4.90621	-2.45621	-1.22255	4.84248	-2.51	-1.52584	4.68805	-2.54195	-1.81044	4.50978	-2.59	-2.07922	4.30539	-2.54	-2.36944
Kinixys_belliana	-0.783	4.93	-4.12	0.694	-3.42	5.01	0.54	-2.69	3.8	-0.898	2.83	-5.92	4.24	0.463	1.55	2.5	1.82	-3.97	-4.03	-0.313	2.22	-3.77	1.41	-3.34	3.7	0.776	-1.22	-4.1	0.173	-0.508	-0.81	4.92	-4.14	-1.18164	4.93	-4.42082	-1.65933	4.93	-4.60983	-2.14028	4.81	-4.70514	-2.56783	4.58217	-4.74406	-2.90861	4.21139	-4.76241	-3.29644
Rafetus_euphraticus	-5.35	-4.21	10.6	7.68	13.6	-11.3	4.63	5.49	-9.49	-6.22	-10.4	8.26	-6.91	7.7	-5.3	-11.5	-2.22	1.39	10.2	1.72	0.158	4.79	-8.36	6.68	-8.8	4.56	-3	9.08	-1.66	2.46	-5.27	-4.25	10.6	-4.30879	-4.6517	10.9	-3.16404	-4.94228	10.9	-2.11069	-5.1531	10.7	-1.03104	-5.40061	10.547	0.0168459	-5.57	10.2	1.12136
Platysternon_megacephalum	3.89	0.568	-2.32	-5.28	-1.44	3.27	-3.28	0.277	3.21	4.03	3.14	-0.288	-2.19	2.61	-0.849	0.252	3.43	-1.76	1.14	-1.13	3.51	3.12	0.0865	2.43	-1.28	3.18	-1.24	2.2	-0.399	3.01	3.96	0.532	-2.25	4.23744	0.41353	-1.93505	4.54079	0.296016	-1.63921	4.8292	0.245448	-1.31264	5.10512	0.242493	-0.97689	5.37628	0.235186	-0.632762	5.54639
Pelodiscus_sinensis	-0.793	-0.0735	3.81	2.16	5.27	-7.43	1.42	3.27	-4.99	-1.36	-3.27	3.35	-3.64	3.34	-3.2	-4.66	1.51	-1.35	5.16	1.7	-1.78	4.63	-0.659	0.912	-4.15	2.04	-2.26	5.05	0.488	-0.576	-0.705	-0.0953	3.88	-0.260746	-0.222414	4	0.182798	-0.356663	4.05657	0.65284	-0.450246	4.09786	1.12205	-0.545166	3.9951	1.58224	-0.626202	3.85011	2.02153
Stigmochelys_pardalis	0.174	8.17	-5.81	-0.81	-6.32	9.14	-0.404	-5.06	5.77	0.479	5.8	-8.41	5.92	-1.68	3.47	5.19	3.89	-4.47	-6.63	-2.05	2.34	-4.49	4.23	-5.33	6.03	0.24	0.0757	-6.17	-0.267	-1.17	0.118	8.17	-5.86	-0.555472	8.12702	-6.3749	-1.36031	7.97981	-6.57006	-2.07023	7.70391	-6.94414	-2.67798	7.35401	-7.4	-3.26657	7.10718	-7.71282	-3.98155
Dermochelys_coriacea	3.82	3.3	0.758	-7.68	1.37	2.7	-5.47	-0.72	1.99	4.95	-0.325	-0.179	-4.17	0.774	4.19	3.03	0.856	3.81	-4.87	1.21	-0.247	1.93	2.3	-2.44	0.258	0.699	4.91	-0.805	2	-2.68	3.82	3.31	0.669	3.83	3.36	0.257998	3.83407	3.37203	-0.151888	3.93	3.37178	-0.548227	3.78504	3.13672	-0.830626	3.52194	2.97	-1.08806	3.21969
Chelonoidis_carbonaria	-1.49	7.49	-5.91	1.16	-5.15	9.38	0.746	-5.06	6.02	-1.66	3.19	-9.53	5.78	-1.12	1.97	4.7	2.11	-3.09	-5.56	-2.02	3.2	-6.26	1.28	-1.89	5.4	-0.935	-0.872	-5.85	-1.75	0.427	-1.58	7.43	-5.93	-2.23436	7.01969	-5.81344	-3.01701	6.89525	-5.82525	-3.77079	6.95461	-5.66651	-4.18148	6.61272	-5.45	-4.65797	5.99553	-5.5035	-5.30915
Rhinoclemmys_annulata	2.79	0.00974	5.99	-4.5	1.91	-7.62	-3.83	-0.277	-6.84	3.24	-2.61	5.9	-6.03	-0.244	-0.53	-2.18	-2.12	5.61	2.7	0.456	-5.1	5.98	-1.46	1.59	-5.19	-1.8	2.19	4.62	-1.1	-2.97	2.88	0.00989	6	3.51262	-0.0184152	5.9586	4.13599	-0.036503	5.84234	4.7216	-0.131641	5.6192	5.24571	-0.36895	5.36238	5.62672	-0.682951	5.00328	6.01793
Emydura_macquarii	-0.0915	6.04	-4.32	0.387	-4.57	7.16	0.459	-4.73	3.61	0.101	3.63	-6.13	4.39	-1.19	2.31	4.1	3.16	-3.07	-3.94	-1.53	2.26	-3.53	2.89	-2.93	4.78	0.157	-1.04	-4.51	0.0538	-1.2	-0.179	6.04	-4.33	-0.759655	5.96549	-4.33	-1.33027	5.82589	-4.33	-1.88929	5.65828	-4.3	-2.41456	5.40597	-4.24649	-2.89872	5.0894	-4.15376	-3.35805
Astrochelys_radiata	5.37	1.2	0.538	-4.19	-0.13	-1.37	-3.18	-0.509	-1.48	5.28	-0.432	-0.663	-1.9	-1.22	1.27	3.19	-1.57	1.4	-1.64	1.89	-2.84	3.72	1.6	-2.93	0.611	-1.99	1.65	0.796	1.61	-3.5	5.37	1.22	0.402	5.42092	1.29729	0.062909	5.59909	1.46455	-0.218103	5.66003	1.57992	-0.564931	5.52793	1.62896	-0.877443	5.56294	1.65411	-1.26351	5.49542
Pyxis_arachnoides	-5.38	1.5	1.96	5.77	-0.223	-1.12	4.53	-0.929	-1.54	-5.72	-1.06	0.407	2.29	2.03	-2.83	-3.79	1.29	-1.62	3.53	-0.957	2.43	-2.83	-1.59	3.08	-0.931	1.46	-3.08	0.302	-1.93	3.09	-5.39	1.46	2.01	-5.42118	1.22291	2.37354	-5.47756	0.805757	2.49732	-5.43998	0.413955	2.71004	-5.28	0.0545099	2.90376	-5.21357	-0.363689	3.05643	-5.03892
Phrynops_tuberosus	-2.18	-3.44	15.9	1.76	6.58	-16.8	0.998	1.29	-12.8	-1.75	-9.27	12.6	-8.57	2.15	-6.33	-9.79	-2.14	4.79	8.97	2.59	-4.29	7.55	-1.55	6.92	-10.2	-1.78	-1.67	9.72	-1.45	0.415	-1.95	-3.5	15.9	-0.776193	-3.65219	16.2	0.458346	-3.67	16.4	1.69232	-3.67705	16.2432	2.8532	-3.74851	15.8	3.91244	-3.75	15.1813	4.92882
Podocnemis_vogli	3.22	12.6	5	-1.9	-15.1	-5.17	-4.22	-11	-4.9	-1.42	14.7	3.23	1.13	-2.87	-8.69	2.41	10.6	-3.75	-5.2	-6.64	4.34	-3.97	7.19	7.88	0.684	4.86	-8.7	-7.62	0.358	7.2	3.12	12.7	5.13	2.41186	12.7881	6.0134	1.53821	12.8	6.76884	0.586897	12.8	7.43451	-0.206866	12.4186	8.10514	-1.0097	11.8878	8.67219	-1.79488
Lissemys_punctata	-1.75	3.06	-2.64	5.01	-1.78	5.85	4.53	-2.26	4.89	-2.68	1.12	-4.13	5.71	-0.649	0.54	2.33	1.47	-4.13	-0.107	-1.63	4.62	-3.91	-0.143	0.665	3.93	0.272	-3.1	-3.3	-1.01	1.82	-1.79	3.05	-2.62	-2.18005	2.91399	-2.41798	-2.60886	2.82623	-2.27934	-3.04	2.77159	-2.15664	-3.14866	2.51925	-1.91209	-3.39202	2.29747	-1.59646	-3.55573
Chelodina_oblonga	-5.07	7.54	-4.98	6.22	-2.73	7.58	4.68	-4.01	4.07	-4.22	3.75	-5.9	6.98	1.98	0.38	2.55	4.92	-3.62	-1.31	-1.73	6.68	-4.87	1.59	1.09	4.66	3.03	-2.39	-3.93	-0.234	2.94	-5.19	7.5	-4.89	-5.64189	7.19811	-4.52165	-6.05941	6.87379	-4.13059	-6.4266	6.52675	-3.71011	-6.64394	6.1301	-3.23615	-6.79018	5.70892	-2.75874	-6.86273
Mesoclemmys_dahli	-5.14	0.523	5.94	6.53	5.34	-6.29	4.49	3	-5.53	-5.22	-2.85	3.16	-1.22	5.58	-4.92	-5.06	3.73	-0.0177	6.18	1.01	0.221	1.42	-0.763	4.47	-3.52	4.14	-3.86	4.47	-0.903	1.58	-5.07	0.469	5.99	-4.60666	0.147163	6.285	-4.11098	-0.140823	6.57314	-3.58023	-0.459091	6.73773	-3.01444	-0.755359	6.79	-2.42875	-1.00472	6.77	-1.81069
Chersina_angulata	1.95	-0.58	3.85	-1.57	3.41	-4.69	-1.1	2.3	-4.03	1.76	-2.2	2.76	-3.18	1.32	-1.25	-0.907	-1.49	1.97	2.43	2.34	-3.08	3.41	-0.621	0.621	-2.45	-0.558	0.256	3.27	0.614	-1.62	2	-0.577	3.82	2.34592	-0.685572	3.71204	2.68007	-0.825029	3.57996	2.94429	-0.954144	3.33571	3.19324	-1.06883	3.06794	3.44669	-1.13	2.78414	3.68915
Gopherus_polyphemus	-3.65	-0.928	6.87	3.85	0.977	-7.8	3.06	-0.143	-6.45	-3.65	-4.68	5.51	-2.83	2.16	-5.24	-6.21	-1.45	1.62	6.37	0.0246	-1.11	1.6	-2.86	5.37	-5.37	-0.286	-2.86	5.08	-2.6	2.13	-3.62	-0.913	6.83	-3.00197	-1.10682	6.85561	-2.50481	-1.42139	7.20139	-2.02821	-1.74089	7.56854	-1.41042	-1.87319	7.49681	-0.845258	-2.20122	7.52092	-0.284697
Sternotherus_odoratus	-2.09	3.62	-2.23	2.73	-2.27	3.44	1.88	-2.18	1.39	-1.45	1.47	-3.05	3.21	0.423	-0.614	1.74	1.92	-2.55	-1.54	-1.67	1.32	-2.96	-0.344	-0.561	2.66	0.989	-1.74	-2.44	-1.21	0.363	-2.14	3.6	-2.23	-2.43894	3.43737	-2.2	-2.69909	3.21818	-2.15	-2.93205	2.96726	-2.12	-3.1407	2.69395	-2.12	-3.28365	2.38722	-2.05635	-3.38084
Graptemys_geographica	-4.64	4.12	-4.68	5.88	-1.42	9.14	5.41	-3.52	6.49	-4.1	0.874	-6.07	6.46	1.2	1.52	1.03	3.37	-5.37	-1.9	-2.78	6.04	-6.53	-0.166	-1.02	4.88	1.49	-2.79	-4.21	-2.98	2.98	-4.73	4.09	-4.65	-5.28653	3.7226	-4.4013	-5.8011	3.24779	-4.27223	-6.40359	2.8976	-4.1488	-6.84323	2.47602	-3.78527	-7.27214	2.06755	-3.39725	-7.59928
Clemmys_guttata	3.83	2.8	-1.14	-4.97	-0.79	2.43	-3.99	-1.01	1.83	3.81	1.05	-1.58	0.119	-0.619	3.52	3.29	0.133	1.92	-2.58	0.891	-1.82	0.552	1.5	-3.34	1.82	-0.71	2.76	-1.33	0.848	-2.98	3.81	2.81	-1.18	3.62654	2.86551	-1.50795	3.48432	2.84432	-1.86271	3.41121	2.8	-2.23514	3.225	2.76833	-2.56667	2.98718	2.72	-2.86282	2.71228
Deirochelys_reticularia	1.87	5.34	-8.13	-1.27	-4.04	8.82	-1.09	-5.44	6.6	1.79	1.88	-9.54	4.89	-1.9	4.13	6.14	1.35	-4.43	-5.77	-1.24	2.62	-3.55	2.06	-5.68	5.54	-1.77	-0.767	-4.59	-1.2	-2.16	1.77	5.33	-8.17	1.10432	5.2417	-8.3483	0.422786	5.15	-8.46742	-0.269141	5.06835	-8.52	-0.952599	4.9313	-8.4871	-1.59427	4.69143	-8.35858	-2.17456
Malaclemys_terrapin	3.19	0.509	2.87	-3.94	2.66	-2.25	-3.29	1.41	-2.47	2.9	-1.24	1.85	-2.83	0.976	1.55	-0.158	-0.677	3.31	0.519	2.44	-2.53	3.22	0.898	-0.544	-1.81	-0.329	2.26	1.77	1.35	-2	3.24	0.518	2.81	3.41603	0.563803	2.51397	3.65703	0.597266	2.26015	3.82403	0.640508	1.95492	3.94897	0.693833	1.63756	4.02785	0.816263	1.32076	4.02085
Kinosternon_baurii	5.5	0.927	1.82	-3.63	0.492	-1.91	-2.66	-0.15	-1.77	5.09	-0.192	1.36	-1.17	-0.972	1.44	2.25	-0.723	2.91	0.472	0.212	-3.05	4.06	0.346	-1.87	0.719	-1.45	2.24	2.45	-0.176	-2.6	5.51	0.938	1.77	5.6273	0.976487	1.44783	5.7397	0.98106	1.1212	5.81471	0.942229	0.785789	5.8381	0.877902	0.449227	5.81961	0.794646	0.114094	5.74058
Emydoidea_blandingii	-3.25	4.29	-3.9	2.68	-3.25	5.65	2.28	-3.38	4.67	-3.19	3.62	-4.33	3.33	-0.29	-0.0442	1.48	1.63	-3.41	-2.79	-1.44	2.32	-4.73	0.0849	-0.635	2.28	0.34	-2.36	-3.88	-1.1	0.185	-3.32	4.27	-3.87	-3.72793	4.12089	-3.68089	-4.14207	4.00448	-3.46345	-4.49889	3.83407	-3.20407	-4.82096	3.54484	-2.99323	-5.11024	3.23976	-2.75381	-5.35184
Eretmochelys_imbricata	-19.5	0.301	-57.9	17	-1.31	-57	10.2	2.86	-54.4	-17.6	7.01	-53.8	5.2	-2.01	-45.7	-13.4	1.12	-46.4	6.98	8.64	-62.9	-12.1	11.5	-62.2	-3.7	-2.08	-42.2	-2.19	12.6	-64.4	-19.5	0.431	-58.1	-19.7	1.65668	-59.187	-19.8	3.17943	-59.7	-19.1	4.52954	-59.9595	-17.9754	5.73703	-60.1	-16.877	6.65069	-60.923	-16.0103
Geochelone_elegans	-1.17	4.14	-1.81	0.592	-1.9	2.84	0.417	-1.5	2.12	-1.12	2.8	-2.85	2.18	0.195	1.29	1.06	2.89	-2.46	-1.83	-0.398	2.39	-2.72	2.31	-1.57	2.24	1.13	-1.06	-3.03	0.401	0.0663	-1.21	4.13	-1.8	-1.50142	4.07286	-1.87714	-1.78187	3.97813	-1.94	-2.01845	3.80078	-1.98	-2.30118	3.71941	-2.02	-2.5044	3.53187	-2.02626	-2.74933
Chelonia_mydas	34.5	-7.45	-113	31.9	31.6	-211	38.6	27	-191	44.3	7.28	-115	61.5	6.62	-183	66.7	-5.64	-142	18.3	45.7	-170	22.8	34.5	-126	69.5	-2.9	-163	16.5	45.3	-146	34.1	-7.04	-113	32.2881	-3.96273	-111.441	30.9	-0.734645	-110	30.3	3.69951	-110	29.5021	6.66353	-110	27.321	9.82484	-111	24.8684
Actinemys_marmorata	4.84	1.11	2.6	-3.63	1.88	-2.31	-2.97	1.14	-2.07	4.84	-0.266	2.28	-1.71	0.305	2.3	1.25	-0.214	3.77	1.43	1.42	-3.18	4.33	0.862	-1.44	-0.148	-0.411	3.4	3.14	0.777	-2.58	4.89	1.13	2.54	5.07414	1.15604	2.19982	5.31574	1.23	1.89995	5.47	1.20756	1.55511	5.59254	1.20254	1.21239	5.7	1.19688	0.839533	5.74
Terrapene_carolina	3.56	0.996	3.33	-3.67	0.26	-4.23	-3.09	0.249	-3.47	3.51	0.398	3.16	-2.98	-0.894	0.813	-0.161	-1.15	3.41	1.68	-0.118	-3.39	3.84	-0.316	-0.614	-1.41	-1.6	2.37	3.08	-0.719	-1.92	3.62	0.996	3.3	3.95025	1.05504	3.07992	4.31481	1.04104	2.94519	4.5861	0.918296	2.6739	4.84741	0.852865	2.3691	5.0678	0.77466	2.02908	5.22486
Testudo_graeca	4.7	4.98	-2.1	-6.73	-3.46	5.68	-4.83	-2.72	4.32	4.63	1.85	-3.43	0.876	-2.31	6.36	6.23	0.659	1.3	-6.31	0.921	-0.395	-0.032	3.48	-4.79	3.89	-2.07	3.75	-3.84	1.41	-3.59	4.6	4.93	-2.13	4.29871	5.10477	-2.70258	3.96604	5.2	-3.25396	3.52714	5.19	-3.748	3.08876	5.11	-4.17478	2.64229	5.0578	-4.67551	2.07766
Hydromedusa_tectifera	-7.46	0.882	2.33	8.9	2.28	-3.05	5.82	1.11	-2.59	-6.53	-0.642	0.975	1.73	4.4	-4.56	-3.46	3.54	-3.36	4.73	-0.539	2.6	-0.0113	-1.55	3.71	-1.09	3.63	-4.93	2.18	-1.86	3.29	-7.45	0.819	2.39	-7.31398	0.390952	2.80805	-7.10936	0.0141936	3.24596	-6.75906	-0.294916	3.64141	-6.37281	-0.603229	3.98544	-5.89378	-0.913496	4.20311	-5.37565
Orlitia_borneensis	-11	5.98	-3.18	15.3	-3.03	6.99	11.8	-4.74	3.51	-10.1	1.02	-5.73	10.7	1.32	-2.22	-2.59	4.18	-8.14	4.46	-4.68	7.68	-8.82	-1.89	2.35	4.41	1.23	-7.16	-2.15	-5.6	4.54	-11.1	5.87	-3.03	-11.131	5.23276	-2.25966	-11.4	4.54166	-1.5586	-11.7416	3.82843	-0.976048	-12	3.0608	-0.497025	-12.3	2.21615	-0.00951362	-12.2
Cuora_amboinensis	-4.37	4.95	-3.96	7.39	-2.67	7.79	6.34	-4.66	5.71	-5.24	1.14	-6.09	5.94	-1.09	-1.03	1.08	1.71	-5.75	-1.26	-3.01	5.2	-5.78	-0.0492	0.0701	3.78	-0.735	-3.61	-3.43	-2.66	2.73	-4.47	4.9	-3.89	-5.00727	4.73636	-3.52091	-5.5152	4.45485	-3.17987	-5.9812	4.0788	-2.86904	-6.40156	3.68844	-2.51822	-6.7503	3.33364	-2.06546	-6.97766
Notochelys_platynota	8.88	5.91	-4.75	-11.4	-5.25	8.15	-8.14	-7.05	3.98	8.55	0.674	-7.14	1.33	-4.94	6.69	7.67	-3.09	1.21	-7.38	0.555	-2.53	-0.785	2.24	-7.69	5.72	-4.11	3.51	-3.56	1.41	-5.83	8.81	5.94	-4.8	8.0523	6.19885	-5.37712	7.45433	6.26	-6.20701	6.91204	6.27228	-6.99	6.1	6.36	-7.25333	5.347	6.46	-7.7916	4.88058
Cyclemys_dentata	-4.79	0.512	6.23	3.49	4.75	-8.72	2.36	2.95	-7.31	-4.85	-1.62	5.54	-4.79	2.7	-5.08	-7.33	0.0907	-0.299	4.99	0.655	-0.479	1.53	-1.63	3.77	-6.5	1.29	-3.93	3.97	-1.13	1.55	-4.71	0.487	6.25	-4.15342	0.293969	6.47658	-3.62796	0.100233	6.94204	-3.0051	-0.058066	7.01007	-2.40165	-0.39973	7.16278	-1.73718	-0.675891	7.28809	-1.03568
Batagur_dhongoka	1.19	5.44	-9.08	-0.814	-0.838	8.63	-0.269	-3.39	4.42	1.34	2.45	-10.4	4.98	-0.65	2.35	5.05	2.42	-6.79	-4.86	-0.304	1.13	-3.36	2.4	-7.63	4.76	-0.856	-2.67	-4.18	-0.486	-3.6	1.07	5.41	-9.12	0.419933	5.26299	-9.27525	-0.229772	5.07631	-9.38342	-0.874921	4.85361	-9.43	-1.49882	4.57559	-9.39712	-2.088	4.2512	-9.2756	-2.63313
Vijayachelys_silvatica	-2.96	3.43	-1.29	5.47	-3.29	3	3.72	-3.25	1.34	-2.96	1.29	-2.93	3.68	0.417	-1.35	0.919	1.8	-3.4	-0.729	-2.32	2.26	-3.13	-0.833	0.291	2.2	0.78	-2.84	-2.18	-1.91	1.14	-3.05	3.42	-1.26	-3.43264	3.24488	-1.17248	-3.73275	2.93633	-1.11454	-3.92078	2.54383	-1.1	-4.18134	2.19731	-1.06289	-4.33432	1.82946	-0.970218	-4.48234
Melanochelys_trijuga	-1.71	7.04	-4.21	1.89	-4.57	7.34	1.64	-5.27	4.8	-1.55	4.84	-5.6	4.96	-0.643	1.35	3.43	3.83	-3.82	-3.77	-2.27	2.47	-5.07	2.12	-2.73	4.49	0.34	-1.35	-4.31	-1.31	-0.343	-1.8	7.04	-4.22	-2.37392	6.79804	-4.23799	-2.89652	6.46956	-4.28	-3.45422	6.22289	-4.38711	-3.89907	5.81093	-4.43	-4.36277	5.40945	-4.33389	-4.86482
Caretta_caretta	-16.1	4.88	-96.1	17.7	-17	-87.3	11.3	-17.7	-96.3	-14.9	-3.05	-106	12.5	-4.73	-101	-1.19	3.57	-108	-0.236	-20.3	-88	-15.2	-14.1	-93.6	6.14	1.18	-106	-9.93	-18.5	-90.5	-16.3	4.63	-96	-17.2904	3.51792	-95.5548	-18.0971	2.23432	-95.3014	-18.8668	0.907127	-95.3668	-19.2	-0.548535	-95.4368	-19.3	-1.9302	-94.8408	-19.1
Dogania_subplana	4.27	1.51	1.27	-13.2	0.0365	0.154	-8.26	-0.32	-0.19	5.25	-0.226	-0.702	-5.48	-3.76	4.94	0.244	-3.89	4.87	-5.39	5.13	-3.69	-0.151	5.17	-3.91	-2.77	-4.24	5.19	-2.86	5.3	-4.06	4.25	1.64	1.16	4.0826	2.11376	0.708462	3.94355	2.67225	0.355942	3.71328	3.15914	-0.0498779	3.40189	3.58679	-0.471265	3.03131	3.95982	-0.897786	2.63548
Heosemys_spinosa	-2.63	-2.97	6.95	3.25	4.86	-6.86	2.96	5.88	-4.94	-2.59	-0.938	8.25	6.05	1.57	0.543	3.33	-0.133	6.96	-4.5	4.29	-2.76	-6.41	1.94	4.45	6.21	1.67	3.51	-5.75	4.48	-0.204	-2.69	-2.95	6.92	-3.30833	-2.7431	6.7769	-4.0223	-2.58885	6.95	-4.6705	-2.26158	6.94842	-5.31014	-2.02973	6.98945	-5.72269	-1.64785	6.71054	-6.30235
Chelus_fimbriata	-1.49	7.49	-5.91	1.16	-5.15	9.38	0.746	-5.06	6.02	-1.66	3.19	-9.53	5.78	-1.12	1.97	4.7	2.11	-3.09	-5.56	-2.02	3.2	-6.26	1.28	-1.89	5.4	-0.935	-0.872	-5.85	-1.75	0.427	-1.58	7.43	-5.93	-2.23436	7.01969	-5.81344	-3.01701	6.89525	-5.82525	-3.77079	6.95461	-5.66651	-4.18148	6.61272	-5.45	-4.65797	5.99553	-5.5035	-5.30915
Macrochelys_temminckii	-2.83	-7.61	-69.4	38.6	6.55	-93	27.2	12.7	-85.2	-2.63	9.22	-67.5	27.8	5.84	-65.8	16.5	6.75	-59.4	9.23	12	-93	-1.8	10.5	-85	21.9	7.29	-61.5	3.6	12.6	-88.1	-3.35	-7.11	-69.8	-4.78459	-5.53489	-70.9041	-6.35454	-4.21316	-72.0974	-8.2001	-3.643	-73.494	-9.69055	-2.22674	-74.2162	-10.6842	-0.359918	-75.2842	-11.4423
Malacochersus_tornieri	5.38	1.9	0.627	-6.96	-0.279	0.394	-5.86	-0.313	0.349	5.93	0.478	-0.58	-2.46	-1.95	3.72	3.91	-1.5	2.8	-3.32	2.91	-2.54	3	2.77	-2.75	0.497	-2.46	3.32	-0.35	2.57	-3.44	5.38	1.94	0.548	5.399	2.25599	0.132616	5.44225	2.51	-0.320815	5.47869	2.58	-0.835014	5.41806	2.69194	-1.3418	5.28089	2.88548	-1.81096	5.04554
Malayemys_subtrijuga	4	-1.52	2.57	-4.83	1.36	-2.84	-3.78	-0.261	-3.13	3.46	-3.43	0.708	-3.24	-1.78	0.691	0.182	-3.41	2.69	0.0897	1.13	-3.38	3.78	-0.594	-1.84	-1.68	-3.43	1.8	2.33	-0.0281	-3.15	4.05	-1.49	2.52	4.27708	-1.36858	2.20151	4.55297	-1.3	1.89244	4.78003	-1.32	1.53995	4.93266	-1.32	1.14874	5.04715	-1.29643	0.746699	5.12287
Indotestudo_elongata	-11.4	-1.15	11	10.3	0.0187	-9.76	6.19	-1.29	-6.18	-10.6	-4.83	8.21	-2.69	0.869	-8.47	-11.6	-1.25	1.99	7.51	-3.54	2.84	-3.5	-5.12	10.3	-6.71	-0.684	-4.55	3.4	-4.91	5.97	-11.3	-1.13	11.1	-10.5165	-1.33339	11.4835	-10.1689	-2.07488	11.9	-9.41899	-2.67501	12.23	-8.7091	-3.39972	12.5	-7.97257	-4.15772	12.6971	-7.00637
Pangshura_tentoria	5.03	5.35	-5.78	-6.81	-2.14	10.9	-5.63	-3.78	8.05	5.46	2.2	-7.56	2.9	-3.05	7.39	8.02	0.541	-1.98	-8.09	-0.251	0.88	-0.945	2.74	-7.23	5.22	-3.13	2.65	-5.09	-0.409	-3.54	4.94	5.36	-5.85	4.28277	5.38	-6.31633	3.66212	5.35801	-6.83192	2.99404	5.19846	-7.24442	2.31415	4.98924	-7.62434	1.61681	4.69491	-7.89905	0.911034
Morenia_petersi	-2.29	5.98	-3.49	3.83	-4.18	6.99	3.32	-4.28	4.83	-2.16	3.22	-4.49	5.69	-0.953	1.55	2.53	3.16	-3.63	-1.48	-2.06	4.19	-4.35	1.17	-0.876	4.57	0.0796	-1.44	-2.95	-1.77	1.42	-2.33	5.97	-3.48	-2.81819	5.74727	-3.4	-3.301	5.50383	-3.44967	-3.71596	5.15404	-3.36161	-4.02204	4.7366	-3.1866	-4.08535	4.35441	-2.83221	-4.41714
Geoemyda_spengleri	-3.93	2.9	-0.101	4.19	0.558	1.5	3.4	-0.423	0.865	-4.17	0.994	-0.831	1.53	2.09	-1.85	-1.67	2	-2.68	-0.0812	0.133	3.19	-3.02	0.325	1.92	-0.0506	1.74	-2.79	-1.65	-0.259	2.76	-3.94	2.89	-0.0673	-3.94	2.6307	0.173085	-4.09477	2.43569	0.414989	-4.12	2.23123	0.71235	-4.23262	2.04738	0.997132	-4.18213	1.84936	1.27276	-4.27926
Manouria_impressa	12.2	2.63	1.89	-13.5	-0.669	-1.16	-9.85	-3.55	-1.98	13.1	-2.95	-0.263	-4.42	-3.68	7.22	7.42	-4.34	7.03	-3.84	2.85	-7.59	8.23	1.54	-7.18	0.77	-5.8	7.41	1.62	1.33	-9.23	12.2	2.66	1.82	12.2739	2.76478	0.667798	12.9224	2.85447	-0.383491	13.6534	3.10069	-1.3181	13.4	3.25172	-2.23655	13.1	3.15729	-3.19744	13.2
Platemys_platycephala	-2.75	5.05	-3.16	6.73	-3.91	4.58	5.56	-3.76	2.91	-2.88	3.39	-4.27	5.96	0.869	-0.733	2.95	3	-3.55	0.253	-1.99	3.56	-3.13	0.815	-0.0319	4.9	1.86	-2.49	-1.86	-1.47	2.03	-2.82	5.02	-3.12	-3.22077	4.79948	-2.88948	-3.581	4.5692	-2.589	-3.88609	4.26934	-2.29238	-4.12671	3.90994	-1.99994	-4.32496	3.53843	-1.69008	-4.43691
Trachemys_scripta	3.38	5.52	-8.67	-1.72	-2.4	9.59	-1.55	-4.1	6.65	3.15	1.88	-10.1	4.91	-0.807	4.33	7.48	1.95	-4.48	-5.48	0.352	1.91	-2.74	3.15	-7.13	6.55	-1.61	-0.445	-4.68	0.332	-3.35	3.32	5.52	-8.7	2.7331	5.55509	-9.08981	1.98647	5.45	-9.42456	1.31485	5.3401	-9.45	0.629934	5.15835	-9.79055	-0.179709	4.96364	-9.78773	-0.956572
Glyptemys_insculpta	-7.79	3.57	-1.88	9.04	-0.872	1.58	7.01	-1.97	0.425	-8.19	1	-3.38	2.95	1.61	-5.17	-3.14	2.14	-6.51	0.571	-2.25	3.88	-5.87	-1.93	1.86	0.0523	1.93	-6.19	-2.93	-2.59	3.07	-7.81	3.52	-1.82	-8.04194	3.09408	-1.34612	-8.36546	2.70681	-0.841246	-8.67696	2.26152	-0.39834	-8.97902	1.80229	0.0587081	-9.151	1.3535	0.583498	-9.108
Chrysemys_picta	1.93	-2.04	6.06	-1.44	5.28	-4.27	-1.64	3.75	-4.51	1.84	-4.24	4.81	-4.31	1.47	-0.163	-2.44	-1.98	3.98	3.35	2.37	-2.22	4.37	-0.979	2.34	-3.99	-0.854	1.45	4.51	0.0771	-0.758	1.99	-2.04	6.05	2.4656	-2.02	5.92813	2.90486	-2.02503	5.71006	3.33475	-1.98	5.47728	3.75466	-1.98	5.22356	4.15431	-1.96	4.93569	4.48722
Proganochelys_quenstedti	-22	7.79	20.5	27.5	23.3	-0.383	26.4	7.99	-12.7	-24	-8.39	9.88	2.83	23.8	-18.9	-25	11.5	-0.757	26.9	-2.27	19.1	-11.7	-7.01	26.1	-11.9	19.1	-16.9	12.6	-9.72	22.5	-21.5	6.92	21.5	-21.2	3.73797	22.388	-22.5485	1.6688	24.2	-22	-0.802056	25.1588	-21.0696	-3.09733	26.7	-20.1	-5.41593	28.9815	-17.7059
Proterochersis_robusta	-1.83	9.43	-72.5	-1.12	6.69	-36.3	-0.968	-2.59	-40.3	-1.36	0.813	-72.4	11.7	0.992	-51.3	9.4	2.4	-64.1	-13.4	0.309	-51.7	-12.8	1.12	-63.7	10.9	-1.09	-56.6	-13.6	-2.03	-57	-1.93	9.41	-72.5	-3.31069	8.70599	-72.4	-4.89842	8.39039	-72.5	-6.39052	8.19895	-72.4	-7.72925	7.6705	-71.9	-9.17055	7.03315	-71.9	-10.327
Plesiochelys_bigleri	171	21.4	-21.5	-257	-12.9	24.9	-198	-32.3	-22.2	160	-11	-91.6	-117	-140	58	137	-109	9.29	-144	120	-77.1	113	115	-110	44.6	-161	22.9	2.34	134	-119	172	23.9	-23.7	172.134	40.975	-34.3607	180	57.9307	-42.1327	175.627	75.5963	-48.8722	168.684	90.9839	-59.8313	161.343	104.657	-72.9544	147.576
[truncated: 746 more columns]

## Sheet: SET2
	V1	V2	V3	V4	V5	V6	V7	V8	V9	V10	V11	V12	V13	V14	V15	V16	V17	V18	V19	V20	V21	V22	V23	V24	V25	V26	V27	V28	V29	V30	V31	V32	V33	V34	V35	V36	V37	V38	V39	V40	V41	V42	V43	V44	V45	V46	V47	V48	V49
Dermatemys_mawi	-0.353	-2.16	11.4	-0.478	3.16	-12.3	0.0012	-2.08	11.4	0.824989	-2.2522	11.1675	1.62238	-2.52815	10.9398	2.38802	-2.82009	10.6332	3.14899	-3.06732	10.288	3.89849	-3.15952	9.8491	4.60868	-3.15248	9.34035	5.27341	-3.06725	8.77788	5.87421	-2.94338	8.1547	6.39399	-2.82842	7.46284	6.83111	-2.74315	6.71238	7.19283	-2.6861	5.91931	7.48467	-2.64543	5.0959	7.70628	-2.60439	4.25049	7.87823
Staurotypus_triporcatus	-8.66	3	-2.78	9.85	-0.297	5.46	-8.72	2.96	-2.7	-9.03043	2.62928	-2.11885	-9.28421	2.24159	-1.54738	-9.48986	1.76028	-1.03024	-9.62	1.16767	-0.624484	-9.5665	0.577384	-0.192335	-9.38723	0.150116	0.38038	-9.14244	-0.217028	0.970102	-8.80635	-0.634379	1.47711	-8.38767	-0.984674	1.97233	-7.91555	-1.21482	2.48951	-7.38489	-1.39837	2.96898	-6.8319	-1.56143	3.43048	-6.2565	-1.7027	3.8708	-5.66459
Claudius_angustatus	4.86	0.805	1.63	-4.02	2.21	-1.24	4.87	0.809	1.58	4.92949	0.825899	1.25253	4.97146	0.797666	0.921767	4.99	0.717995	0.592892	4.90677	0.63516	0.277801	4.7882	0.60409	-0.0362438	4.65024	0.625439	-0.344926	4.50268	0.658331	-0.647449	4.3195	0.699625	-0.928798	4.13635	0.740517	-1.21153	3.91643	0.789554	-1.46357	3.68213	0.854361	-1.69787	3.43938	0.913092	-1.92546	3.16626	0.904477	-2.12149	2.86163
Sacalia_quadriocellata	2.82	-0.771	1.6	-3.25	1.37	-2.19	2.87	-0.767	1.56	3.05095	-0.764905	1.32905	3.19275	-0.762275	1.07176	3.30081	-0.755797	0.797807	3.37266	-0.727937	0.516117	3.42	-0.674622	0.239506	3.43706	-0.613705	-0.0483235	3.41186	-0.548354	-0.334142	3.3809	-0.466887	-0.6158	3.31994	-0.36482	-0.885411	3.22713	-0.243038	-1.13573	3.12526	-0.11516	-1.37949	2.99983	0.00763465	-1.61521	2.85077	0.128483	-1.83904	2.69964
Mauremys_reevesii	-5.4	3.07	0.0947	6.61	2.32	1.8	-5.41	3	0.189	-5.45849	2.73056	0.549817	-5.48	2.45131	0.906299	-5.54	2.20438	1.2758	-5.53312	1.95936	1.6544	-5.43556	1.70556	2.00555	-5.28972	1.46972	2.34535	-5.07519	1.23639	2.66361	-4.79473	0.996734	2.92316	-4.47263	0.796894	3.15895	-4.14305	0.631525	3.41848	-3.74603	0.485608	3.57698	-3.32796	0.383592	3.72068	-2.92582	0.352	3.91894	-2.48934
Apalone_mutica	3.69	3.78	-4.26	-1.98	-1.87	5.24	3.62	3.8	-4.27	3.117	3.83	-4.329	2.61654	3.81776	-4.41224	2.13421	3.69903	-4.51	1.63651	3.6173	-4.55	1.1422	3.51073	-4.52037	0.663902	3.35304	-4.48	0.201052	3.29854	-4.53	0.0375408	3.70205	-4.4824	-0.100444	3.64956	-4.60492	-0.230949	3.16452	-4.51397	0.0382758	3.25333	-4.48598	-0.352886	3.0913	-4.50456	-0.791208	2.87845	-4.35807	-1.20713
Pelusios_situatus	-14.3	3.55	-5.17	16.7	-2.44	5.05	-14.4	3.44	-5.02	-15.0785	2.82368	-4.16014	-15.4	2.10692	-3.20647	-15.7	1.34459	-2.29247	-15.9	0.518018	-1.40002	-15.8052	-0.421344	-0.590981	-15.6868	-1.28717	0.143984	-15.2993	-2.14104	0.957066	-14.6785	-2.87073	1.71073	-14.1576	-3.67509	2.49086	-13.4963	-4.50484	3.18409	-12.7398	-5.22813	3.88113	-11.7847	-5.76074	4.46535	-10.8548	-6.26808	5.14894	-9.84632
Elseya_novaeguineae	-5.68	4.71	-2.78	6.36	-4.36	4.65	-5.81	4.61	-2.69	-6.17188	4.25406	-2.39723	-6.54641	3.91937	-2.09203	-6.80501	3.47748	-1.80623	-7.00124	3.0219	-1.48314	-7.11986	2.54151	-1.16096	-7.09202	2.07809	-0.801862	-7.07796	1.65166	-0.393085	-7.00663	1.22651	0.0126683	-6.89436	0.806421	0.413426	-6.79991	0.4111	0.842927	-6.58292	0.0356816	1.24392	-6.26874	-0.324736	1.59205	-5.94035	-0.686907	1.92624	-5.63867
Chelydra_serpentina	1.23	0.45	-12.2	0.877	-0.244	11.5	1.32	0.46	-12.2	2.36622	0.856733	-12.1	3.36774	1.37734	-12	4.4165	1.83354	-12.0471	5.41845	2.31845	-12.2	6.31672	2.98836	-12.0833	7.27708	3.34613	-11.7129	8.23446	3.58735	-11.2711	9.00489	3.96326	-10.7	9.73089	4.37324	-10.0382	10.3515	4.73061	-9.21332	10.8	5.13939	-8.28334	11.1	5.52568	-7.28486	11.2	5.82988	-6.20054	11.4
Carettochelys_insculpta	-12.1	-19.1	30.5	7.8	13.5	59.9	-12.1	-19	30.3	-11.8501	-17.9501	28.9003	-11.9	-16.6561	27.7561	-11.773	-15.373	26.8	-10.8177	-14.2177	26.1177	-9.85254	-12.9751	25.4751	-9.10908	-11.5558	24.8	-8.26831	-10.1139	24.3	-7.76816	-8.50604	23.8816	-7.73	-6.80805	23.5	-7.90097	-4.98175	23.5	-7.96967	-3.22705	23.8	-7.63227	-1.49293	24.1	-7.15215	0.185715	24.5	-6.72844
Emys_orbicularis	-4.08	3.08	0.289	6.5	0.805	1.08	-4.09	3.02	0.361	-4.14242	2.75546	0.668208	-4.18505	2.47968	0.967352	-4.21	2.18956	1.25363	-4.18208	1.85834	1.48375	-4.11355	1.53419	1.71936	-3.97072	1.23787	1.9557	-3.75342	0.973422	2.17658	-3.50753	0.724589	2.38685	-3.2346	0.504218	2.59405	-2.94413	0.275424	2.76235	-2.62975	0.0372192	2.8681	-2.28756	-0.163722	2.95874	-1.91157	-0.313479	3.01369	-1.54179
Pelomedusa_subrufa	-5.02	2.3	-0.583	5.4	-0.375	2.69	-5.03	2.26	-0.537	-5.24098	2.14935	-0.19944	-5.42519	1.99481	0.139857	-5.55393	1.81214	0.48473	-5.62	1.62444	0.849395	-5.61552	1.44209	1.22135	-5.55097	1.24194	1.5816	-5.38654	1.01238	1.88385	-5.23315	0.811778	2.2137	-5.0455	0.630215	2.53812	-4.80909	0.451478	2.83068	-4.49411	0.274467	3.03794	-4.20853	0.0764219	3.26688	-3.88507	-0.0918215	3.46794	-3.53311
Psammobates_tentorius	-0.19	3.96	-3.74	-0.21	-2.45	3.61	-0.227	3.96	-3.74	-0.513733	3.97	-3.67573	-0.854604	3.99728	-3.89544	-1.1934	3.8483	-4.07	-1.5244	3.7076	-4.0272	-1.86499	3.63167	-4.24249	-2.25067	3.53233	-4.33	-2.52237	3.33527	-4.21763	-2.86532	3.15575	-4.10681	-3.16218	2.91673	-3.94782	-3.36622	2.63511	-3.73756	-3.56994	2.35013	-3.5351	-3.74854	2.07218	-3.29291	-3.88	1.83951	-2.97963	-3.90574
Homopus_femoralis	-0.555	5.02	-2.47	1.44	-1.58	2.96	-0.599	5.01	-2.47	-0.891335	4.90621	-2.45621	-1.22255	4.84248	-2.51	-1.52584	4.68805	-2.54195	-1.81044	4.50978	-2.59	-2.07922	4.30539	-2.54	-2.36944	4.12042	-2.49014	-2.60998	3.90003	-2.39001	-2.79541	3.64918	-2.24459	-2.84	3.39924	-2.03308	-2.97547	3.15358	-1.83905	-3.0316	2.90521	-1.60521	-3.03278	2.66834	-1.35112	-2.97193	2.44966	-1.08966	-2.94
Kinixys_belliana	-0.783	4.93	-4.12	0.694	-3.42	5.01	-0.81	4.92	-4.14	-1.18164	4.93	-4.42082	-1.65933	4.93	-4.60983	-2.14028	4.81	-4.70514	-2.56783	4.58217	-4.74406	-2.90861	4.21139	-4.76241	-3.29644	3.93267	-4.95911	-3.68365	3.58781	-4.91927	-3.99588	3.23117	-4.74117	-4.22794	2.90309	-4.41309	-4.40944	2.53141	-4.09141	-4.52	2.14941	-3.74927	-4.49	1.79525	-3.37034	-4.47691	1.63618	-2.87854	-4.51
Rafetus_euphraticus	-5.35	-4.21	10.6	7.68	13.6	-11.3	-5.27	-4.25	10.6	-4.30879	-4.6517	10.9	-3.16404	-4.94228	10.9	-2.11069	-5.1531	10.7	-1.03104	-5.40061	10.547	0.0168459	-5.57	10.2	1.12136	-5.60836	9.91343	2.20489	-5.51093	9.45232	3.2693	-5.25195	9.00486	4.2888	-5.07902	8.43316	5.24496	-4.88223	7.76669	6.06958	-4.65261	6.96042	6.78207	-4.33196	6.08391	7.53353	-3.78539	5.36755	8.24645
Platysternon_megacephalum	3.89	0.568	-2.32	-5.28	-1.44	3.27	3.96	0.532	-2.25	4.23744	0.41353	-1.93505	4.54079	0.296016	-1.63921	4.8292	0.245448	-1.31264	5.10512	0.242493	-0.97689	5.37628	0.235186	-0.632762	5.54639	0.193845	-0.232502	5.52578	0.0502478	0.174027	5.38932	-0.0189462	0.579533	5.27567	-0.151756	0.977224	5.03838	-0.31302	1.30953	4.75742	-0.40831	1.63258	4.48058	-0.531357	1.94942	4.17538	-0.639655	2.24654	3.8427
Pelodiscus_sinensis	-0.793	-0.0735	3.81	2.16	5.27	-7.43	-0.705	-0.0953	3.88	-0.260746	-0.222414	4	0.182798	-0.356663	4.05657	0.65284	-0.450246	4.09786	1.12205	-0.545166	3.9951	1.58224	-0.626202	3.85011	2.02153	-0.700187	3.64915	2.43595	-0.736473	3.39053	2.79999	-0.722001	3.0625	3.13916	-0.683345	2.71084	3.46954	-0.647061	2.35061	3.7674	-0.598229	1.9668	4.04532	-0.514539	1.57535	4.38537	-0.363267	1.2578	4.69855
Stigmochelys_pardalis	0.174	8.17	-5.81	-0.81	-6.32	9.14	0.118	8.17	-5.86	-0.555472	8.12702	-6.3749	-1.36031	7.97981	-6.57006	-2.07023	7.70391	-6.94414	-2.67798	7.35401	-7.4	-3.26657	7.10718	-7.71282	-3.98155	6.70204	-7.94359	-4.71656	6.28172	-7.94724	-5.3388	5.7812	-7.65747	-5.28	5.4027	-7.05539	-5.43959	4.74821	-6.65301	-5.74683	4.11634	-6.16528	-5.99152	3.55087	-5.57935	-5.96911	2.96792	-4.95792	-6.05116
Dermochelys_coriacea	3.82	3.3	0.758	-7.68	1.37	2.7	3.82	3.31	0.669	3.83	3.36	0.257998	3.83407	3.37203	-0.151888	3.93	3.37178	-0.548227	3.78504	3.13672	-0.830626	3.52194	2.97	-1.08806	3.21969	3.01147	-1.36736	2.8834	3.01049	-1.60757	2.54865	2.93546	-1.83681	2.25028	2.76028	-2.05972	2.05091	2.49091	-2.29909	1.7481	2.29905	-2.50095	1.39456	2.14819	-2.65272	1.01116	2.09	-2.78687	0.602074
Chelonoidis_carbonaria	-1.49	7.49	-5.91	1.16	-5.15	9.38	-1.58	7.43	-5.93	-2.23436	7.01969	-5.81344	-3.01701	6.89525	-5.82525	-3.77079	6.95461	-5.66651	-4.18148	6.61272	-5.45	-4.65797	5.99553	-5.5035	-5.30915	5.61543	-5.51181	-5.99006	5.44	-5.21982	-6.14027	4.91906	-4.89987	-6.54968	4.26639	-4.73213	-7.01824	3.79176	-4.3196	-7.2	3.30857	-3.78786	-7.39009	2.77312	-3.24312	-7.61284	2.2672	-2.6772	-7.70717
Rhinoclemmys_annulata	2.79	0.00974	5.99	-4.5	1.91	-7.62	2.88	0.00989	6	3.51262	-0.0184152	5.9586	4.13599	-0.036503	5.84234	4.7216	-0.131641	5.6192	5.24571	-0.36895	5.36238	5.62672	-0.682951	5.00328	6.01793	-0.803497	4.51972	6.18637	-0.875183	3.91817	6.49432	-0.890864	3.36514	6.71015	-0.904672	2.76954	6.83334	-0.941674	2.14658	6.77	-0.813676	1.54841	6.62839	-0.492777	1.0233	6.34667	-0.306335	0.490894	6.23369
Emydura_macquarii	-0.0915	6.04	-4.32	0.387	-4.57	7.16	-0.179	6.04	-4.33	-0.759655	5.96549	-4.33	-1.33027	5.82589	-4.33	-1.88929	5.65828	-4.3	-2.41456	5.40597	-4.24649	-2.89872	5.0894	-4.15376	-3.35805	4.74195	-4.04639	-3.74548	4.33452	-3.88226	-4.09652	3.91348	-3.67878	-4.43041	3.52946	-3.38959	-4.72691	3.14745	-3.05745	-5.00292	2.7661	-2.7061	-5.2301	2.37979	-2.32732	-5.40369	1.98354	-1.93262	-5.58181
Astrochelys_radiata	5.37	1.2	0.538	-4.19	-0.13	-1.37	5.37	1.22	0.402	5.42092	1.29729	0.062909	5.59909	1.46455	-0.218103	5.66003	1.57992	-0.564931	5.52793	1.62896	-0.877443	5.56294	1.65411	-1.26351	5.49542	1.70729	-1.64561	5.33816	1.72796	-1.9998	5.06102	1.8098	-2.20817	4.87827	1.77304	-2.5526	4.59232	1.80282	-2.81205	4.2275	1.80438	-2.94562	3.86557	1.76	-3.08685	3.51209	1.78358	-3.25396	3.13282
Pyxis_arachnoides	-5.38	1.5	1.96	5.77	-0.223	-1.12	-5.39	1.46	2.01	-5.42118	1.22291	2.37354	-5.47756	0.805757	2.49732	-5.43998	0.413955	2.71004	-5.28	0.0545099	2.90376	-5.21357	-0.363689	3.05643	-5.03892	-0.757136	3.19405	-4.76527	-1.06978	3.36484	-4.39433	-1.26567	3.49853	-4.06775	-1.52135	3.6709	-3.66385	-1.68538	3.77769	-3.22596	-1.62599	3.79	-2.79884	-1.64423	3.69423	-2.3652	-1.75747	3.74	-1.94202
Phrynops_tuberosus	-2.18	-3.44	15.9	1.76	6.58	-16.8	-1.95	-3.5	15.9	-0.776193	-3.65219	16.2	0.458346	-3.67	16.4	1.69232	-3.67705	16.2432	2.8532	-3.74851	15.8	3.91244	-3.75	15.1813	4.92882	-3.75	14.4151	5.9802	-3.64245	13.7061	6.98937	-3.35354	13.0339	7.83849	-3.1343	12.1287	8.50135	-3.04239	11.0477	9.23165	-2.90179	10.0119	9.892	-2.75582	8.93545	10.48	-2.57799	7.82197	10.842
Podocnemis_vogli	3.22	12.6	5	-1.9	-15.1	-5.17	3.12	12.7	5.13	2.41186	12.7881	6.0134	1.53821	12.8	6.76884	0.586897	12.8	7.43451	-0.206866	12.4186	8.10514	-1.0097	11.8878	8.67219	-1.79488	11.2347	9.20182	-2.533	10.456	9.5976	-3.13291	9.50332	9.87189	-3.64763	8.47334	10.0069	-4.12529	7.45213	10.2	-4.59538	6.4277	10.4	-5.00876	5.34235	10.4	-5.40648	4.25122	10.4	-5.80243
Lissemys_punctata	-1.75	3.06	-2.64	5.01	-1.78	5.85	-1.79	3.05	-2.62	-2.18005	2.91399	-2.41798	-2.60886	2.82623	-2.27934	-3.04	2.77159	-2.15664	-3.14866	2.51925	-1.91209	-3.39202	2.29747	-1.59646	-3.55573	2.06712	-1.2314	-3.66418	1.81746	-0.858411	-3.7533	1.56675	-0.480799	-3.8	1.30284	-0.105166	-3.83511	1.00323	0.243259	-3.87	0.661645	0.551927	-3.87	0.306607	0.846506	-3.78962	-0.00844185	1.17268	-3.68857
Chelodina_oblonga	-5.07	7.54	-4.98	6.22	-2.73	7.58	-5.19	7.5	-4.89	-5.64189	7.19811	-4.52165	-6.05941	6.87379	-4.13059	-6.4266	6.52675	-3.71011	-6.64394	6.1301	-3.23615	-6.79018	5.70892	-2.75874	-6.86273	5.2836	-2.26813	-6.87846	4.88077	-1.74923	-6.78089	4.47536	-1.24625	-6.65556	4.12113	-0.708079	-6.45051	3.78103	-0.184642	-6.1994	3.43921	0.318211	-5.96455	3.07796	0.811875	-5.72808	2.69164	1.28932	-5.48853
Mesoclemmys_dahli	-5.14	0.523	5.94	6.53	5.34	-6.29	-5.07	0.469	5.99	-4.60666	0.147163	6.285	-4.11098	-0.140823	6.57314	-3.58023	-0.459091	6.73773	-3.01444	-0.755359	6.79	-2.42875	-1.00472	6.77	-1.81069	-1.15983	6.75339	-1.19497	-1.26154	6.61691	-0.60775	-1.36064	6.37808	-0.028853	-1.43145	6.1242	0.56503	-1.45638	5.88534	1.11745	-1.46	5.55953	1.6462	-1.41451	5.20028	2.19671	-1.35166	4.88081	2.7619
Chersina_angulata	1.95	-0.58	3.85	-1.57	3.41	-4.69	2	-0.577	3.82	2.34592	-0.685572	3.71204	2.68007	-0.825029	3.57996	2.94429	-0.954144	3.33571	3.19324	-1.06883	3.06794	3.44669	-1.13	2.78414	3.68915	-1.13695	2.48475	3.88927	-1.07382	2.16146	4.01756	-0.95305	1.81732	4.09575	-0.812774	1.4655	4.15	-0.659563	1.1157	4.12329	-0.500938	0.766498	4.04903	-0.333931	0.426316	4.01	-0.126543	0.101616	3.99244
Gopherus_polyphemus	-3.65	-0.928	6.87	3.85	0.977	-7.8	-3.62	-0.913	6.83	-3.00197	-1.10682	6.85561	-2.50481	-1.42139	7.20139	-2.02821	-1.74089	7.56854	-1.41042	-1.87319	7.49681	-0.845258	-2.20122	7.52092	-0.284697	-2.54317	7.70159	0.362995	-2.73029	7.68	0.86136	-2.82	7.3566	1.40443	-3.03407	7.10779	2.01036	-3.12434	6.80265	2.57097	-3.13	6.42886	2.91517	-3.08212	5.88059	3.44501	-2.975	5.46249	3.92063
Sternotherus_odoratus	-2.09	3.62	-2.23	2.73	-2.27	3.44	-2.14	3.6	-2.23	-2.43894	3.43737	-2.2	-2.69909	3.21818	-2.15	-2.93205	2.96726	-2.12	-3.1407	2.69395	-2.12	-3.28365	2.38722	-2.05635	-3.38084	2.08205	-1.92832	-3.46313	1.78905	-1.76531	-3.53797	1.49219	-1.60812	-3.57	1.1994	-1.4296	-3.54185	0.913576	-1.23925	-3.49991	0.625668	-1.06036	-3.43805	0.339956	-0.877044	-3.37837	0.0675194	-0.672802	-3.29943
Graptemys_geographica	-4.64	4.12	-4.68	5.88	-1.42	9.14	-4.73	4.09	-4.65	-5.28653	3.7226	-4.4013	-5.8011	3.24779	-4.27223	-6.40359	2.8976	-4.1488	-6.84323	2.47602	-3.78527	-7.27214	2.06755	-3.39725	-7.59928	1.649	-2.92729	-7.78566	1.19736	-2.41453	-7.91192	0.754881	-1.86944	-7.93171	0.282476	-1.33885	-7.85327	-0.172552	-0.79674	-7.67333	-0.601557	-0.257442	-7.47001	-0.95649	0.325483	-7.16707	-1.26341	0.893485	-6.87473
Clemmys_guttata	3.83	2.8	-1.14	-4.97	-0.79	2.43	3.81	2.81	-1.18	3.62654	2.86551	-1.50795	3.48432	2.84432	-1.86271	3.41121	2.8	-2.23514	3.225	2.76833	-2.56667	2.98718	2.72	-2.86282	2.71228	2.68076	-3.12772	2.38851	2.63	-3.3269	2.05925	2.59308	-3.51692	1.72744	2.47581	-3.65419	1.36081	2.41016	-3.74	0.985123	2.33752	-3.78248	0.616059	2.23019	-3.78	0.253249	2.10626	-3.74084	-0.0963113
Deirochelys_reticularia	1.87	5.34	-8.13	-1.27	-4.04	8.82	1.77	5.33	-8.17	1.10432	5.2417	-8.3483	0.422786	5.15	-8.46742	-0.269141	5.06835	-8.52	-0.952599	4.9313	-8.4871	-1.59427	4.69143	-8.35858	-2.17456	4.37635	-8.13908	-2.71409	4.03994	-7.85195	-3.21328	3.70098	-7.50148	-3.63355	3.32753	-7.08861	-3.95622	2.91529	-6.6268	-4.23834	2.56166	-6.095	-4.50032	2.2746	-5.51428	-4.75173	1.97231	-4.93654	-4.97243
Malaclemys_terrapin	3.19	0.509	2.87	-3.94	2.66	-2.25	3.24	0.518	2.81	3.41603	0.563803	2.51397	3.65703	0.597266	2.26015	3.82403	0.640508	1.95492	3.94897	0.693833	1.63756	4.02785	0.816263	1.32076	4.02085	0.918273	0.985825	4.0357	0.974696	0.643117	4.00632	1.03579	0.307372	3.8635	1.10433	-0.00578666	3.71409	1.17591	-0.310076	3.58924	1.25538	-0.62775	3.40481	1.33259	-0.912821	3.25065	1.40974	-1.21884	3.07587
Kinosternon_baurii	5.5	0.927	1.82	-3.63	0.492	-1.91	5.51	0.938	1.77	5.6273	0.976487	1.44783	5.7397	0.98106	1.1212	5.81471	0.942229	0.785789	5.8381	0.877902	0.449227	5.81961	0.794646	0.114094	5.74058	0.74629	-0.220211	5.58536	0.75375	-0.529645	5.42272	0.796183	-0.833641	5.2167	0.827711	-1.10948	4.97509	0.843936	-1.35618	4.71304	0.845576	-1.58484	4.43388	0.829876	-1.79074	4.15127	0.789228	-1.98899	3.87108
Emydoidea_blandingii	-3.25	4.29	-3.9	2.68	-3.25	5.65	-3.32	4.27	-3.87	-3.72793	4.12089	-3.68089	-4.14207	4.00448	-3.46345	-4.49889	3.83407	-3.20407	-4.82096	3.54484	-2.99323	-5.11024	3.23976	-2.75381	-5.35184	2.9127	-2.4927	-5.54	2.57971	-2.19981	-5.64437	2.24407	-1.87407	-5.69	1.88949	-1.54949	-5.67139	1.52976	-1.22837	-5.55667	1.17836	-0.916856	-5.44438	0.814074	-0.618885	-5.31771	0.486344	-0.287886	-5.09127
Eretmochelys_imbricata	-19.5	0.301	-57.9	17	-1.31	-57	-19.5	0.431	-58.1	-19.7	1.65668	-59.187	-19.8	3.17943	-59.7	-19.1	4.52954	-59.9595	-17.9754	5.73703	-60.1	-16.877	6.65069	-60.923	-16.0103	7.84448	-61.7897	-15.1887	9.09702	-62.5	-14.2263	10.2737	-63.1737	-13.1143	11.2928	-63.7928	-11.9414	12.2293	-64.4293	-10.5063	12.8	-65.0937	-9.05145	13.2	-65.8	-7.53508	13.4	-66.2277	-6.05697
Geochelone_elegans	-1.17	4.14	-1.81	0.592	-1.9	2.84	-1.21	4.13	-1.8	-1.50142	4.07286	-1.87714	-1.78187	3.97813	-1.94	-2.01845	3.80078	-1.98	-2.30118	3.71941	-2.02	-2.5044	3.53187	-2.02626	-2.74933	3.34756	-2.04689	-2.9436	3.1364	-1.95093	-3.15312	2.92688	-1.86229	-3.31181	2.69639	-1.73819	-3.41876	2.45249	-1.57687	-3.48834	2.22752	-1.38752	-3.51863	2.00687	-1.17687	-3.55212	1.77728	-0.966613	-3.54443
Chelonia_mydas	34.5	-7.45	-113	31.9	31.6	-211	34.1	-7.04	-113	32.2881	-3.96273	-111.441	30.9	-0.734645	-110	30.3	3.69951	-110	29.5021	6.66353	-110	27.321	9.82484	-111	24.8684	12.8071	-112	23.2815	16.4554	-113	21.9452	20.2417	-114	20.7017	24.2948	-114.491	19.8	28.4149	-115	19.1963	31.5642	-117	18.7595	34.6027	-119	18.6	37.4279	-121.57	18.0594
Actinemys_marmorata	4.84	1.11	2.6	-3.63	1.88	-2.31	4.89	1.13	2.54	5.07414	1.15604	2.19982	5.31574	1.23	1.89995	5.47	1.20756	1.55511	5.59254	1.20254	1.21239	5.7	1.19688	0.839533	5.74	1.19278	0.455719	5.65411	1.25	0.0823644	5.55087	1.27913	-0.290476	5.43529	1.26764	-0.66554	5.22548	1.25	-0.99627	5.00971	1.25014	-1.32058	4.7941	1.28	-1.64508	4.53696	1.28217	-1.94304	4.26814
Terrapene_carolina	3.56	0.996	3.33	-3.67	0.26	-4.23	3.62	0.996	3.3	3.95025	1.05504	3.07992	4.31481	1.04104	2.94519	4.5861	0.918296	2.6739	4.84741	0.852865	2.3691	5.0678	0.77466	2.02908	5.22486	0.707884	1.65541	5.23768	0.697536	1.24841	5.20854	0.674102	0.837525	5.17994	0.619947	0.428372	5.10383	0.522064	0.0371108	4.97581	0.435841	-0.3466	4.81205	0.360615	-0.719044	4.60971	0.281873	-1.07041	4.38156
Testudo_graeca	4.7	4.98	-2.1	-6.73	-3.46	5.68	4.6	4.93	-2.13	4.29871	5.10477	-2.70258	3.96604	5.2	-3.25396	3.52714	5.19	-3.748	3.08876	5.11	-4.17478	2.64229	5.0578	-4.67551	2.07766	4.97	-5.02706	1.43259	4.82086	-5.14	0.871472	4.54523	-5.18216	0.23302	4.36926	-5.3	-0.402665	4.14237	-5.25619	-1.00137	3.88519	-5.08259	-1.58179	3.56218	-4.97205	-2.00745	3.10255	-4.73109	-2.49385
Hydromedusa_tectifera	-7.46	0.882	2.33	8.9	2.28	-3.05	-7.45	0.819	2.39	-7.31398	0.390952	2.80805	-7.10936	0.0141936	3.24596	-6.75906	-0.294916	3.64141	-6.37281	-0.603229	3.98544	-5.89378	-0.913496	4.20311	-5.37565	-1.18718	4.38288	-4.85614	-1.43395	4.59193	-4.33188	-1.65604	4.81604	-3.76132	-1.83067	4.95533	-3.15946	-1.91405	5.00595	-2.55146	-1.97	4.95629	-1.95077	-2.04981	4.8851	-1.34546	-2.09	4.81943	-0.738499
Orlitia_borneensis	-11	5.98	-3.18	15.3	-3.03	6.99	-11.1	5.87	-3.03	-11.131	5.23276	-2.25966	-11.4	4.54166	-1.5586	-11.7416	3.82843	-0.976048	-12	3.0608	-0.497025	-12.3	2.21615	-0.00951362	-12.2	1.38145	0.597355	-12	0.66165	1.28441	-11.5111	0.0709521	1.85662	-11.1338	-0.577819	2.54942	-10.5457	-1.21569	3.14256	-9.85506	-1.82494	3.63095	-9.10293	-2.38499	4.08582	-8.26938	-2.8519	4.5419	-7.42686
Cuora_amboinensis	-4.37	4.95	-3.96	7.39	-2.67	7.79	-4.47	4.9	-3.89	-5.00727	4.73636	-3.52091	-5.5152	4.45485	-3.17987	-5.9812	4.0788	-2.86904	-6.40156	3.68844	-2.51822	-6.7503	3.33364	-2.06546	-6.97766	2.92213	-1.58703	-7.04	2.46155	-1.10155	-7.06	2.01657	-0.595931	-7.04142	1.54137	-0.118225	-6.94671	1.07456	0.357659	-6.74026	0.632383	0.821571	-6.48029	0.227006	1.29347	-6.21054	-0.170101	1.76496	-5.89498
Notochelys_platynota	8.88	5.91	-4.75	-11.4	-5.25	8.15	8.81	5.94	-4.8	8.0523	6.19885	-5.37712	7.45433	6.26	-6.20701	6.91204	6.27228	-6.99	6.1	6.36	-7.25333	5.347	6.46	-7.7916	4.88058	6.47	-8.65965	3.91559	6.43093	-8.96093	2.96453	6.28487	-8.9653	2.10809	6.06582	-9.48709	1.11537	5.75179	-9.50119	0.237122	5.41073	-9.13	-0.690588	4.94443	-9.01666	-1.61045	4.54161	-8.71794	-2.45992
Cyclemys_dentata	-4.79	0.512	6.23	3.49	4.75	-8.72	-4.71	0.487	6.25	-4.15342	0.293969	6.47658	-3.62796	0.100233	6.94204	-3.0051	-0.058066	7.01007	-2.40165	-0.39973	7.16278	-1.73718	-0.675891	7.28809	-1.03568	-0.877755	7.28491	-0.545276	-1.02156	6.89	0.120222	-1.24812	6.71281	0.80079	-1.35	6.46579	1.42611	-1.43846	6.10926	2.00406	-1.53	5.67062	2.57564	-1.57391	5.2174	3.05838	-1.61129	4.68904	3.62732
Batagur_dhongoka	1.19	5.44	-9.08	-0.814	-0.838	8.63	1.07	5.41	-9.12	0.419933	5.26299	-9.27525	-0.229772	5.07631	-9.38342	-0.874921	4.85361	-9.43	-1.49882	4.57559	-9.39712	-2.088	4.2512	-9.2756	-2.63313	3.8968	-9.06344	-3.12734	3.52541	-8.77178	-3.56159	3.13841	-8.4115	-3.9483	2.7617	-7.99194	-4.31241	2.43466	-7.51345	-4.63542	2.19966	-6.95916	-4.91337	2.0093	-6.36326	-5.17057	1.81943	-5.75859	-5.41691
Vijayachelys_silvatica	-2.96	3.43	-1.29	5.47	-3.29	3	-3.05	3.42	-1.26	-3.43264	3.24488	-1.17248	-3.73275	2.93633	-1.11454	-3.92078	2.54383	-1.1	-4.18134	2.19731	-1.06289	-4.33432	1.82946	-0.970218	-4.48234	1.44828	-0.819842	-4.51795	1.07181	-0.602656	-4.43433	0.765028	-0.304793	-4.38216	0.504858	0.0372023	-4.25345	0.191625	0.313755	-4.05651	-0.109659	0.56061	-3.86645	-0.370143	0.856208	-3.6196	-0.5782	1.1504	-3.30386
Melanochelys_trijuga	-1.71	7.04	-4.21	1.89	-4.57	7.34	-1.8	7.04	-4.22	-2.37392	6.79804	-4.23799	-2.89652	6.46956	-4.28	-3.45422	6.22289	-4.38711	-3.89907	5.81093	-4.43	-4.36277	5.40945	-4.33389	-4.86482	5.09099	-4.1842	-5.27103	4.71056	-3.90476	-5.51135	4.2473	-3.56298	-5.69757	3.78094	-3.18851	-5.82564	3.29746	-2.81028	-5.93632	2.85946	-2.37841	-5.99	2.39748	-1.9607	-5.98	1.95739	-1.51529	-5.91431
Caretta_caretta	-16.1	4.88	-96.1	17.7	-17	-87.3	-16.3	4.63	-96	-17.2904	3.51792	-95.5548	-18.0971	2.23432	-95.3014	-18.8668	0.907127	-95.3668	-19.2	-0.548535	-95.4368	-19.3	-1.9302	-94.8408	-19.1	-3.21741	-94.0639	-19	-4.66331	-93.5247	-18.8	-6.11589	-93.0979	-18.5721	-7.58525	-92.8	-18.4	-9.08295	-92.6	-18.2	-10.5781	-92.374	-17.7945	-12.0165	-92.1945	-17.3542	-13.4375	-91.8542	-16.74
Dogania_subplana	4.27	1.51	1.27	-13.2	0.0365	0.154	4.25	1.64	1.16	4.0826	2.11376	0.708462	3.94355	2.67225	0.355942	3.71328	3.15914	-0.0498779	3.40189	3.58679	-0.471265	3.03131	3.95982	-0.897786	2.63548	4.26874	-1.3517	2.24236	4.5262	-1.83813	1.80667	4.67897	-2.33333	1.35917	4.89882	-2.79083	0.88558	5.17387	-3.18742	0.343642	5.39337	-3.52506	-0.257994	5.53096	-3.80192	-0.901336	5.63191	-3.98287	-1.55764
Heosemys_spinosa	-2.63	-2.97	6.95	3.25	4.86	-6.86	-2.69	-2.95	6.92	-3.30833	-2.7431	6.7769	-4.0223	-2.58885	6.95	-4.6705	-2.26158	6.94842	-5.31014	-2.02973	6.98945	-5.72269	-1.64785	6.71054	-6.30235	-1.19059	6.66588	-6.8058	-0.662254	6.4721	-7.0965	-0.191873	6.06975	-7.3427	0.303746	5.6473	-7.63108	0.81701	5.17731	-7.68412	1.32175	4.63118	-7.49017	1.73933	4.131	-7.6925	2.0825	3.495	-7.68169
Chelus_fimbriata	-1.49	7.49	-5.91	1.16	-5.15	9.38	-1.58	7.43	-5.93	-2.23436	7.01969	-5.81344	-3.01701	6.89525	-5.82525	-3.77079	6.95461	-5.66651	-4.18148	6.61272	-5.45	-4.65797	5.99553	-5.5035	-5.30915	5.61543	-5.51181	-5.99006	5.44	-5.21982	-6.14027	4.91906	-4.89987	-6.54968	4.26639	-4.73213	-7.01824	3.79176	-4.3196	-7.2	3.30857	-3.78786	-7.39009	2.77312	-3.24312	-7.61284	2.2672	-2.6772	-7.70717
Macrochelys_temminckii	-2.83	-7.61	-69.4	38.6	6.55	-93	-3.35	-7.11	-69.8	-4.78459	-5.53489	-70.9041	-6.35454	-4.21316	-72.0974	-8.2001	-3.643	-73.494	-9.69055	-2.22674	-74.2162	-10.6842	-0.359918	-75.2842	-11.4423	1.04185	-77.0268	-11.1844	2.42908	-78.8625	-10.7629	3.69155	-80.8483	-9.90215	4.50602	-82.9026	-8.63914	6.12065	-84.0006	-7.14184	7.2312	-85.4727	-5.42166	8.50275	-86.3262	-3.98369	10.0547	-87.3924	-2.18402
Malacochersus_tornieri	5.38	1.9	0.627	-6.96	-0.279	0.394	5.38	1.94	0.548	5.399	2.25599	0.132616	5.44225	2.51	-0.320815	5.47869	2.58	-0.835014	5.41806	2.69194	-1.3418	5.28089	2.88548	-1.81096	5.04554	3.04289	-2.25313	4.64379	3.11095	-2.5681	4.19089	2.95137	-2.39797	4.43405	3.07392	-2.60304	4.36571	3.09428	-2.68713	3.98693	3.13288	-2.98154	3.51782	3.21913	-3.18826	3.01103	3.26263	-3.3079	2.50196
Malayemys_subtrijuga	4	-1.52	2.57	-4.83	1.36	-2.84	4.05	-1.49	2.52	4.27708	-1.36858	2.20151	4.55297	-1.3	1.89244	4.78003	-1.32	1.53995	4.93266	-1.32	1.14874	5.04715	-1.29643	0.746699	5.12287	-1.24427	0.337927	5.17	-1.14261	-0.0676317	5.1038	-0.986594	-0.452084	4.93898	-0.849772	-0.812377	4.81318	-0.692405	-1.18046	4.70024	-0.449995	-1.50293	4.46586	-0.235928	-1.77725	4.19635	-0.0417479	-2.03365	3.95369
Indotestudo_elongata	-11.4	-1.15	11	10.3	0.0187	-9.76	-11.3	-1.13	11.1	-10.5165	-1.33339	11.4835	-10.1689	-2.07488	11.9	-9.41899	-2.67501	12.23	-8.7091	-3.39972	12.5	-7.97257	-4.15772	12.6971	-7.00637	-4.74983	12.7	-5.98266	-5.13347	12.6	-5.02377	-5.46649	12.3	-4.09067	-5.70351	11.8824	-3.15367	-5.82063	11.3937	-2.20225	-5.82602	10.9	-1.2546	-5.73851	10.3851	-0.346904	-5.63845	9.73073	0.521774
Pangshura_tentoria	5.03	5.35	-5.78	-6.81	-2.14	10.9	4.94	5.36	-5.85	4.28277	5.38	-6.31633	3.66212	5.35801	-6.83192	2.99404	5.19846	-7.24442	2.31415	4.98924	-7.62434	1.61681	4.69491	-7.89905	0.911034	4.34002	-8.05399	0.17777	4.01431	-8.08	-0.576217	3.75556	-7.99	-1.32302	3.57425	-7.76137	-1.98633	3.32184	-7.38306	-2.60266	3.0815	-6.923	-3.18603	2.87479	-6.41199	-3.7563	2.66185	-5.8837	-4.30438
Morenia_petersi	-2.29	5.98	-3.49	3.83	-4.18	6.99	-2.33	5.97	-3.48	-2.81819	5.74727	-3.4	-3.301	5.50383	-3.44967	-3.71596	5.15404	-3.36161	-4.02204	4.7366	-3.1866	-4.08535	4.35441	-2.83221	-4.41714	3.9781	-2.64286	-4.73398	3.59631	-2.40088	-4.93826	3.20871	-2.06871	-5.01	2.80653	-1.69653	-5.02909	2.42092	-1.30092	-5.00469	2.06816	-0.876668	-4.91558	1.7579	-0.427847	-4.80293	1.42114	-0.00380057	-4.68755
Geoemyda_spengleri	-3.93	2.9	-0.101	4.19	0.558	1.5	-3.94	2.89	-0.0673	-3.94	2.6307	0.173085	-4.09477	2.43569	0.414989	-4.12	2.23123	0.71235	-4.23262	2.04738	0.997132	-4.18213	1.84936	1.27276	-4.27926	1.61185	1.52815	-4.33723	1.35661	1.77616	-4.06883	1.19441	1.87	-3.9304	0.969727	2.07879	-3.71923	0.770073	2.29077	-3.43158	0.644211	2.42	-3.12636	0.527951	2.57182	-2.8187	0.43661	2.72	-2.48501
Manouria_impressa	12.2	2.63	1.89	-13.5	-0.669	-1.16	12.2	2.66	1.82	12.2739	2.76478	0.667798	12.9224	2.85447	-0.383491	13.6534	3.10069	-1.3181	13.4	3.25172	-2.23655	13.1	3.15729	-3.19744	13.2	3.21	-4.44879	12.8344	3.31	-5.59877	12.171	3.3813	-6.54449	11.5	2.81294	-6.72119	10.7009	2.81	-7.51947	9.67525	2.82	-8.231	8.43993	2.74496	-8.45832	7.45518	2.39707	-8.60827	6.22992
Platemys_platycephala	-2.75	5.05	-3.16	6.73	-3.91	4.58	-2.82	5.02	-3.12	-3.22077	4.79948	-2.88948	-3.581	4.5692	-2.589	-3.88609	4.26934	-2.29238	-4.12671	3.90994	-1.99994	-4.32496	3.53843	-1.69008	-4.43691	3.14161	-1.36852	-4.46	2.74163	-1.0331	-4.40049	2.3318	-0.716178	-4.3045	1.9325	-0.392605	-4.20819	1.55547	-0.0442741	-4.04777	1.16944	0.270895	-3.88179	0.810806	0.613119	-3.73724	0.483207	0.994441	-3.50497
Trachemys_scripta	3.38	5.52	-8.67	-1.72	-2.4	9.59	3.32	5.52	-8.7	2.7331	5.55509	-9.08981	1.98647	5.45	-9.42456	1.31485	5.3401	-9.45	0.629934	5.15835	-9.79055	-0.179709	4.96364	-9.78773	-0.956572	4.7656	-9.62399	-1.71441	4.6124	-9.386	-2.43673	4.45904	-8.99519	-3.07641	4.36519	-8.46877	-3.66271	4.30061	-7.8879	-4.19472	4.19459	-7.2514	-4.65028	4.03977	-6.56936	-5.03534	3.84977	-5.85421	-5.36857
Glyptemys_insculpta	-7.79	3.57	-1.88	9.04	-0.872	1.58	-7.81	3.52	-1.82	-8.04194	3.09408	-1.34612	-8.36546	2.70681	-0.841246	-8.67696	2.26152	-0.39834	-8.97902	1.80229	0.0587081	-9.151	1.3535	0.583498	-9.108	0.923601	1.142	-8.69767	0.589804	1.61699	-8.46498	0.195979	2.16503	-8.02348	-0.0756112	2.65652	-7.44137	-0.260356	3.01123	-6.81406	-0.468955	3.26826	-6.16135	-0.642063	3.50533	-5.50879	-0.772711	3.76795	-4.87149
Chrysemys_picta	1.93	-2.04	6.06	-1.44	5.28	-4.27	1.99	-2.04	6.05	2.4656	-2.02	5.92813	2.90486	-2.02503	5.71006	3.33475	-1.98	5.47728	3.75466	-1.98	5.22356	4.15431	-1.96	4.93569	4.48722	-1.85759	4.59278	4.77131	-1.69934	4.2218	5.02825	-1.54705	3.8288	5.23739	-1.37261	3.41891	5.38308	-1.16383	3.00458	5.45948	-0.941415	2.57262	5.49	-0.695518	2.14586	5.47	-0.448039	1.71929	5.43732
Proganochelys_quenstedti	-22	7.79	20.5	27.5	23.3	-0.383	-21.5	6.92	21.5	-21.2	3.73797	22.388	-22.5485	1.6688	24.2	-22	-0.802056	25.1588	-21.0696	-3.09733	26.7	-20.1	-5.41593	28.9815	-17.7059	-7.04412	30.1	-15.926	-9.19623	32.148	-13.167	-10.633	32.667	-11.0261	-12.9	32.2739	-7.99121	-14.2467	32.6	-4.88202	-14.8	31.4117	-1.59509	-15.186	30.286	1.5367	-14.5605	28.9605	4.81783
Proterochersis_robusta	-1.83	9.43	-72.5	-1.12	6.69	-36.3	-1.93	9.41	-72.5	-3.31069	8.70599	-72.4	-4.89842	8.39039	-72.5	-6.39052	8.19895	-72.4	-7.72925	7.6705	-71.9	-9.17055	7.03315	-71.9	-10.327	6.30651	-71.173	-11.3205	5.80192	-70.4	-12.5	5.12437	-69.8146	-13.5	4.53976	-68.8663	-14.3311	3.85135	-67.7689	-15.3	2.87871	-67.3	-15.7529	2.04299	-66.0471	-16.2446	1.42772	-64.6554	-16.6
Plesiochelys_bigleri	171	21.4	-21.5	-257	-12.9	24.9	172	23.9	-23.7	172.134	40.975	-34.3607	180	57.9307	-42.1327	175.627	75.5963	-48.8722	168.684	90.9839	-59.8313	161.343	104.657	-72.9544	147.576	111.808	-85.9394	133.546	119.636	-96.3543	121.728	130.181	-105.181	107.59	142.205	-111	90.1347	150.803	-114.803	75.8298	150.912	-113.365	78.8728	153.881	-115.083	79.5583	154.291	-113.328	74.7445
[truncated: 197 more columns]

## Sheet: SET3
	V1	V2	V3	V4	V5	V6	V7	V8	V9	V10	V11	V12	V13	V14	V15	V16	V17	V18	V19	V20	V21	V22	V23	V24	V25	V26	V27	V28	V29	V30	V31	V32	V33	V34	V35	V36	V37	V38	V39	V40	V41	V42	V43	V44	V45	V46	V47	V48	V49
Dermatemys_mawi	-7.36	-2.75	-0.0311	6.76	-3.06	-0.0666	-7.3	-2.88	-0.0461	-6.3652	-3.23103	-0.130309	-5.37065	-3.45987	-0.18597	-4.38676	-3.73108	-0.24818	-3.39275	-3.95572	-0.305	-2.37425	-4.05083	-0.320083	-1.35274	-4.10919	-0.324459	-0.333704	-4.19	-0.33768	0.689043	-4.21	-0.338742	1.70934	-4.14295	-0.324443	2.72777	-4.04945	-0.315945	3.7451	-3.94499	-0.307997	4.75018	-3.76262	-0.266524	5.74235	-3.52071	-0.208142	6.7
Staurotypus_triporcatus	1.85	0.201	-5.09	-3.17	-3.2	4.55	1.81	0.139	-5	1.50656	-0.312854	-4.3985	1.18836	-0.725755	-3.77672	0.870324	-1.13563	-3.15265	0.549324	-1.54478	-2.53043	0.206112	-1.87667	-1.87445	-0.154229	-2.15355	-1.2029	-0.520339	-2.35525	-0.508848	-0.859188	-2.62546	0.174977	-1.19391	-2.81696	0.889683	-1.54011	-2.9667	1.60857	-1.91608	-3.06031	2.32185	-2.29575	-3.14368	3.03414	-2.69109	-3.21158	3.73901	-3.1
Claudius_angustatus	-1.09	-0.216	2.24	0.904	0.749	-2.66	-1.07	-0.211	2.21	-0.836215	-0.38648	1.9113	-0.643837	-0.559351	1.58094	-0.461575	-0.71285	1.2362	-0.306249	-0.852947	0.879588	-0.158626	-0.813813	0.487941	-0.0230692	-0.734268	0.0976942	0.105904	-0.642081	-0.291701	0.235294	-0.578353	-0.686488	0.371354	-0.496823	-1.07589	0.519876	-0.392992	-1.45469	0.651199	-0.157271	-1.77266	0.722146	0.133728	-2.06487	0.794498	0.416743	-2.36437	0.893
Sacalia_quadriocellata	-1.24	-1.91	1.29	1.8	0.0703	-2.28	-1.21	-1.9	1.23	-1.03412	-1.86353	0.920057	-0.844128	-1.77618	0.628838	-0.638166	-1.64441	0.366153	-0.425093	-1.49834	0.117344	-0.205428	-1.35616	-0.128341	0.0154319	-1.21355	-0.372679	0.233838	-1.06707	-0.617423	0.450472	-0.932786	-0.869602	0.665736	-0.805106	-1.12789	0.884829	-0.668125	-1.37775	1.09996	-0.538525	-1.63495	1.31935	-0.393489	-1.87935	1.54168	-0.19749	-2.08168	1.76
Mauremys_reevesii	0.572	1.8	-3.23	-0.573	-0.786	3.43	0.563	1.75	-3.21	0.481456	1.28364	-2.95091	0.397617	0.873928	-2.60847	0.303476	0.570837	-2.1712	0.208792	0.324039	-1.69881	0.118015	0.101537	-1.21294	0.0311239	-0.133934	-0.732611	-0.0442282	-0.343533	-0.245592	-0.11992	-0.542189	0.249837	-0.194442	-0.673176	0.770361	-0.285194	-0.822202	1.2837	-0.380959	-0.960414	1.79911	-0.462025	-1.05	2.32684	-0.530932	-0.973402	2.85799	-0.571
Apalone_mutica	5.76	0.0322	0.37	-2.15	2	-2.89	5.7	0.0141	0.328	5.14668	0.0143477	0.0396399	4.5917	0.023804	-0.244605	4.02992	0.078612	-0.510038	3.46207	0.160189	-0.75517	2.8864	0.24754	-0.979047	2.31734	0.345856	-1.21295	1.75882	0.462086	-1.46194	1.2079	0.651329	-1.68454	0.663551	0.835636	-1.92435	0.113712	1.0098	-2.1598	-0.450056	1.20109	-2.34109	-1.00216	1.42831	-2.51623	-1.53186	1.71106	-2.68053	-2.07
Pelusios_situatus	2.76	-0.0553	-11.9	-4.82	-8.1	5.88	2.73	-0.227	-11.9	2.33224	-1.44014	-11.1075	1.87185	-2.48661	-10.1062	1.30266	-3.16208	-8.87058	0.728741	-3.77482	-7.58208	0.158127	-4.34486	-6.27279	-0.383339	-4.95122	-4.96755	-0.898749	-5.6216	-3.68313	-1.43621	-6.19621	-2.36711	-1.98139	-6.78139	-1.05481	-2.5273	-7.36657	0.258221	-3.08143	-7.91715	1.58144	-3.63162	-8.43054	2.84396	-4.2	-8.415	4.26999	-4.75
Elseya_novaeguineae	2.44	2.68	-3.97	-4.73	-2.33	2.04	2.39	2.59	-4	1.99428	1.83857	-4.21429	1.54233	1.09389	-4.31	1.05373	0.367492	-4.28275	0.508479	-0.262197	-4.01973	-0.0764819	-0.787797	-3.63261	-0.671992	-1.25936	-3.19477	-1.25692	-1.69985	-2.71446	-1.83773	-2.08515	-2.18227	-2.41514	-2.42108	-1.61337	-2.98367	-2.67947	-1.00207	-3.50727	-2.78068	-0.313373	-3.93916	-2.72028	0.444384	-4.34797	-2.58469	1.20594	-4.7
Chelydra_serpentina	-9.8	6.31	-1.47	11.8	6.05	-1.07	-9.75	6.25	-1.5	-8.21725	6.28909	-1.63	-6.65854	6.33	-1.80768	-5.12598	6.46	-2.1055	-3.57018	6.55	-2.27442	-2.02224	6.34064	-2.3	-0.536883	5.87246	-2.44377	0.957009	5.44557	-2.58	2.4821	5.74602	-2.44	3.98365	6.17012	-2.28329	5.52241	6.36	-2.06952	7.06026	6.31997	-1.74995	8.59697	6.1853	-1.45061	10.144	6.12	-1.1956	11.7
Carettochelys_insculpta	-18.2	-6.58	53.3	-6.65	5.55	30.3	-18.1	-6.49	53.1	-17.4234	-5.54341	51.5468	-16.7063	-4.59507	50.0063	-16.1	-3.66078	48.451	-15.3199	-2.79791	46.8398	-14.4609	-1.97696	45.2218	-13.6408	-1.19299	43.5815	-12.7914	-0.413872	41.9743	-12.0449	0.45238	40.3347	-11.3418	1.32816	38.6837	-10.5879	2.22209	37.0758	-9.72585	3.07203	35.4788	-8.78028	3.85407	33.8861	-7.84595	4.6188	32.278	-6.86
Emys_orbicularis	0.493	2.09	-3.13	-0.619	-1.07	2.13	0.489	2.04	-3.11	0.454625	1.6215	-2.92575	0.410141	1.23284	-2.68428	0.360009	0.90055	-2.37339	0.304994	0.658121	-1.98711	0.225543	0.432739	-1.59417	0.111808	0.200214	-1.21369	-0.0163098	-0.026516	-0.834165	-0.140557	-0.248821	-0.450575	-0.262429	-0.482486	-0.0730816	-0.383562	-0.714222	0.305839	-0.486815	-0.906867	0.710549	-0.560234	-1.03279	1.14676	-0.604606	-1.09	1.6006	-0.62
Pelomedusa_subrufa	0.17	0.883	-2.73	-2.17	-1.39	3.26	0.155	0.84	-2.72	-0.0225494	0.495487	-2.41081	-0.211711	0.301844	-1.98822	-0.39208	0.188496	-1.53248	-0.567539	0.0955114	-1.07009	-0.715135	0.0677417	-0.601574	-0.862019	-0.0348966	-0.131136	-1.01846	-0.186582	0.322239	-1.18337	-0.405747	0.741771	-1.35155	-0.725412	1.08541	-1.5143	-0.979156	1.47859	-1.68893	-1.23524	1.87417	-1.86214	-1.44214	2.2975	-2.02796	-1.54	2.75491	-2.16
Psammobates_tentorius	3.41	0.312	-2	-3.87	0.465	-1.87	3.37	0.282	-2.01	2.99492	-0.0953068	-2.16902	2.52038	-0.37842	-2.29392	1.99024	-0.565627	-2.38	1.42554	-0.619	-2.39	0.856537	-0.611122	-2.37	0.290367	-0.59343	-2.34	-0.273904	-0.545541	-2.32	-0.83733	-0.595874	-2.34	-1.40161	-0.596	-2.32	-1.96939	-0.582606	-2.29	-2.5325	-0.520287	-2.24964	-3.05722	-0.326667	-2.14759	-3.51423	-0.0112666	-2.03144	-3.84
Homopus_femoralis	3	2.2	-1.32	-2.69	1.31	-0.308	2.98	2.14	-1.36	2.64995	1.88998	-1.50335	2.2772	1.66594	-1.58469	1.86221	1.51492	-1.59	1.4341	1.42082	-1.53082	1.00543	1.34513	-1.44513	0.581552	1.25562	-1.35041	0.156827	1.17783	-1.25522	-0.268117	1.09037	-1.17056	-0.699053	1.0119	-1.1019	-1.13065	0.934902	-1.03322	-1.56189	0.901089	-0.937801	-1.97802	0.932505	-0.792991	-2.33975	1.07487	-0.58081	-2.65
Kinixys_belliana	3.7	0.776	-1.22	-4.1	0.173	-0.508	3.66	0.719	-1.24	3.26565	0.286328	-1.37812	2.79211	-0.0691507	-1.48798	2.22996	-0.276677	-1.52889	1.63444	-0.373396	-1.52	1.03411	-0.395907	-1.46473	0.436543	-0.436162	-1.38784	-0.159628	-0.488098	-1.31195	-0.75489	-0.549606	-1.24415	-1.35165	-0.627374	-1.19604	-1.9516	-0.66102	-1.14	-2.55186	-0.647111	-1.08352	-3.12552	-0.518513	-0.956233	-3.63693	-0.25693	-0.770272	-4.06
Rafetus_euphraticus	-8.8	4.56	-3	9.08	-1.66	2.46	-8.69	4.41	-3.1	-7.7436	3.29254	-3.70426	-6.67303	2.22529	-4.17566	-5.42326	1.31365	-4.38039	-4.06243	0.538595	-4.31373	-2.62972	-0.0217969	-3.98789	-1.19877	-0.583483	-3.6533	0.243599	-1.10646	-3.26265	1.65768	-1.72256	-2.92744	3.05064	-2.15758	-2.33452	4.41747	-2.51566	-1.6482	5.77068	-2.73089	-0.878996	6.97721	-2.64173	0.118442	8.03402	-2.26479	1.23402	9.01
Platysternon_megacephalum	-1.28	3.18	-1.24	2.2	-0.399	3.01	-1.22	3.17	-1.14	-0.995021	3.11167	-0.729875	-0.757362	2.99888	-0.338616	-0.516203	2.86006	0.0329764	-0.258242	2.62335	0.348976	-0.00302097	2.37541	0.658502	0.247332	2.12325	0.968938	0.49409	1.88291	1.29064	0.747523	1.59236	1.55764	1.01242	1.30758	1.82242	1.27745	1.04255	2.10745	1.52846	0.761576	2.39058	1.76282	0.449665	2.65282	1.96855	0.0669465	2.83391	2.17
Pelodiscus_sinensis	-4.15	2.04	-2.26	5.05	0.488	-0.576	-4.07	1.99	-2.27	-3.46618	1.66809	-2.3	-2.85588	1.36294	-2.33	-2.21877	1.11626	-2.31875	-1.55736	0.963776	-2.22304	-0.892658	0.853358	-2.09504	-0.226811	0.775444	-1.95111	0.437638	0.702351	-1.79753	1.09357	0.525928	-1.71607	1.75349	0.356152	-1.6395	2.41766	0.213756	-1.54904	3.0845	0.137	-1.42388	3.7262	0.200838	-1.18908	4.3526	0.298705	-0.92675	4.96
Stigmochelys_pardalis	6.03	0.24	0.0757	-6.17	-0.267	-1.17	5.99	0.165	0.022	5.59784	-0.515105	-0.472673	4.78294	-0.879658	-0.785199	3.87759	-1.04	-0.986138	2.92724	-1.01	-1.03	1.98827	-1.03686	-1.11686	1.06386	-1.00929	-1.17	0.128227	-0.974722	-1.20216	-0.763906	-1.06564	-1.30282	-1.70117	-1.09302	-1.38954	-2.64319	-1.16155	-1.51309	-3.58275	-1.24909	-1.64909	-4.52771	-1.18807	-1.69	-5.42356	-0.89883	-1.57858	-6.11
Dermochelys_coriacea	0.258	0.699	4.91	-0.805	2	-2.68	0.259	0.541	4.85	0.244939	-0.128796	4.49286	0.225143	-0.794116	4.13065	0.156406	-1.26232	3.53899	0.0762619	-1.69188	2.91921	-0.062021	-1.81	2.2069	-0.207812	-1.81	1.46167	-0.318068	-1.82525	0.726238	-0.409975	-1.48459	0.113662	-0.525644	-1.17839	-0.569705	-0.630565	-0.81843	-1.22469	-0.685491	-0.184568	-1.63243	-0.739815	0.426965	-2.07815	-0.772392	1.11405	-2.37714	-0.801
Chelonoidis_carbonaria	5.4	-0.935	-0.872	-5.85	-1.75	0.427	5.26	-1.01	-0.892	4.45778	-1.29095	-0.943643	3.65849	-1.58076	-1.00022	3.06015	-2.05002	-1.14004	2.24278	-1.92	-0.968133	1.40044	-1.87511	-0.8656	0.559974	-1.8619	-0.748795	-0.277494	-1.88019	-0.637884	-1.11757	-2.01454	-0.588122	-1.95843	-2.13979	-0.528157	-2.79569	-2.25734	-0.429798	-3.57772	-2.58	-0.40697	-4.19221	-2.17593	-0.133743	-4.97756	-1.96124	0.102418	-5.76
Rhinoclemmys_annulata	-5.19	-1.8	2.19	4.62	-1.1	-2.97	-5.15	-1.87	2.15	-4.61191	-2.37206	1.77493	-3.95682	-2.64864	1.36697	-3.22967	-2.69	0.975772	-2.49267	-2.62908	0.603334	-1.75877	-2.5361	0.232192	-1.02724	-2.45198	-0.145438	-0.312431	-2.44806	-0.560147	0.38781	-2.36222	-0.957017	1.11112	-2.29563	-1.35056	1.84589	-2.25	-1.72795	2.58237	-2.19252	-2.10119	3.31714	-2.05796	-2.45306	4.00654	-1.7123	-2.73885	4.57
Emydura_macquarii	4.78	0.157	-1.04	-4.51	0.0538	-1.2	4.71	0.12	-1.09	4.15976	-0.179095	-1.42634	3.5683	-0.445222	-1.72085	2.95003	-0.70299	-1.95999	2.28069	-0.894832	-2.0999	1.582	-1.00008	-2.1776	0.871941	-1.02582	-2.2	0.16077	-1.04	-2.21	-0.547829	-1.08	-2.22	-1.25895	-1.09	-2.18789	-1.95864	-1.01591	-2.09591	-2.61981	-0.824934	-1.9172	-3.26438	-0.599883	-1.71732	-3.87331	-0.317677	-1.48334	-4.45
Astrochelys_radiata	0.611	-1.99	1.65	0.796	1.61	-3.5	0.6	-1.94	1.6	0.578401	-2.05	1.16761	0.562395	-1.95198	0.7141	0.560746	-1.75254	0.300191	0.602722	-1.52834	-0.102719	0.609313	-1.23458	-0.463063	0.650972	-1.03021	-0.874728	0.652663	-0.809505	-1.28229	0.655456	-0.51937	-1.64674	0.724597	-0.213028	-1.98597	0.742097	0.0678651	-2.35487	0.747	0.338969	-2.73371	0.759365	0.696655	-3.03388	0.78055	1.07374	-3.30187	0.797
Pyxis_arachnoides	-0.931	1.46	-3.08	0.302	-1.93	3.09	-0.92	1.37	-3.05	-0.859695	0.877058	-2.84798	-0.793918	0.39829	-2.60891	-0.707233	0.00464441	-2.25479	-0.611025	-0.306831	-1.82466	-0.522946	-0.614189	-1.38973	-0.450896	-0.899917	-0.938373	-0.388779	-1.15158	-0.472545	-0.316339	-1.42189	-0.016243	-0.230799	-1.64911	0.463003	-0.133693	-1.8428	0.956537	-0.0341962	-2.02403	1.45412	0.0721051	-2.097	1.97403	0.179909	-2.03745	2.49891	0.286
Phrynops_tuberosus	-10.2	-1.78	-1.67	9.72	-1.45	0.415	-10.1	-1.87	-1.67	-8.78227	-2.51387	-1.67484	-7.45353	-3.12882	-1.7761	-6.00298	-3.32588	-1.70824	-4.54045	-3.28442	-1.56325	-3.08784	-3.16943	-1.36414	-1.6443	-3.01962	-1.12405	-0.198557	-2.89826	-0.898259	1.26348	-3.00312	-0.77721	2.72606	-3.12528	-0.679037	4.19295	-3.19132	-0.592891	5.65923	-3.16003	-0.488065	7.07556	-2.86111	-0.280889	8.32895	-2.19587	0.103616	9.61
Podocnemis_vogli	0.684	4.86	-8.7	-7.62	0.358	7.2	0.554	4.84	-8.6	-0.514188	4.70768	-7.82151	-1.39665	4.495	-6.84835	-2.19742	4.27753	-5.80595	-2.92813	4.0482	-4.71553	-3.57284	3.78358	-3.57979	-4.16598	3.48947	-2.42296	-4.73289	3.19325	-1.25566	-5.34658	2.89186	-0.111805	-5.94387	2.57806	1.03774	-6.47696	2.25587	2.21523	-6.90599	1.87881	3.41836	-7.36588	1.46695	4.59199	-7.52597	0.971128	5.81718	-7.6
Lissemys_punctata	3.93	0.272	-3.1	-3.3	-1.01	1.82	3.89	0.218	-3.1	3.41674	-0.216722	-2.93558	2.90389	-0.566924	-2.70695	2.36731	-0.825257	-2.41275	1.8277	-1.02216	-2.08011	1.28794	-1.09916	-1.7071	0.743414	-1.17728	-1.34696	0.217836	-1.33278	-0.981891	-0.297958	-1.45038	-0.58638	-0.800132	-1.59338	-0.177235	-1.33614	-1.72	0.192539	-1.86123	-1.69554	0.596428	-2.37739	-1.59932	1.00298	-2.86775	-1.41535	1.4062	-3.27
Chelodina_oblonga	4.66	3.03	-2.39	-3.93	-0.234	2.94	4.61	2.88	-2.43	4.21689	2.10849	-2.53	3.70853	1.39709	-2.52285	3.17283	0.708183	-2.4687	2.53629	0.165549	-2.28598	1.80618	-0.150967	-1.92179	1.0646	-0.420374	-1.54247	0.330744	-0.680276	-1.14288	-0.370888	-0.917464	-0.676387	-1.06696	-1.15281	-0.200412	-1.76231	-1.34678	0.294133	-2.38645	-1.29613	0.876455	-2.91419	-1.03817	1.52457	-3.42402	-0.73352	2.16625	-3.84
Mesoclemmys_dahli	-3.52	4.14	-3.86	4.47	-0.903	1.58	-3.49	4.04	-3.87	-3.1523	3.28613	-3.82846	-2.75779	2.55802	-3.74	-2.25966	1.9431	-3.56483	-1.63156	1.56578	-3.17578	-1.00297	1.19149	-2.78149	-0.389137	0.795665	-2.38185	0.226433	0.413479	-1.97261	0.846196	0.0606217	-1.548	1.47175	-0.265424	-1.1055	2.0998	-0.630447	-0.697848	2.72024	-1.00842	-0.289399	3.32269	-1.14676	0.241227	3.86303	-1.03337	0.864343	4.4
Chersina_angulata	-2.45	-0.558	0.256	3.27	0.614	-1.62	-2.41	-0.579	0.229	-2.06034	-0.730847	-0.0126621	-1.68177	-0.815823	-0.244116	-1.27929	-0.779886	-0.443314	-0.872325	-0.700433	-0.623974	-0.451312	-0.626462	-0.772777	-0.022321	-0.5534	-0.89752	0.399637	-0.437661	-1.00861	0.808943	-0.381172	-1.18242	1.22578	-0.303773	-1.33859	1.64999	-0.219002	-1.464	2.07557	-0.113189	-1.57139	2.491	0.0439098	-1.65517	2.87948	0.272587	-1.6681	3.22
Gopherus_polyphemus	-5.37	-0.286	-2.86	5.08	-2.6	2.13	-5.31	-0.445	-2.89	-4.75966	-1.13848	-2.78797	-4.15065	-1.7624	-2.6388	-3.39436	-2.11188	-2.33218	-2.59998	-2.30385	-1.97845	-1.81348	-2.42807	-1.57674	-1.04364	-2.58344	-1.16656	-0.271869	-2.76786	-0.771811	0.517468	-2.95737	-0.413806	1.31478	-3.16136	-0.0774875	2.11099	-3.35291	0.273851	2.89905	-3.45409	0.676934	3.67929	-3.41658	1.10245	4.36911	-3.1248	1.5752	5
Sternotherus_odoratus	2.66	0.989	-1.74	-2.44	-1.21	0.363	2.61	0.957	-1.73	2.30022	0.657455	-1.7	1.98867	0.367385	-1.66	1.65752	0.111011	-1.57251	1.29477	-0.0622377	-1.41791	0.910527	-0.177199	-1.25892	0.526914	-0.299655	-1.10041	0.154455	-0.444782	-0.942236	-0.21039	-0.636303	-0.811988	-0.578229	-0.825805	-0.682337	-0.946075	-1.01209	-0.548328	-1.32321	-1.14464	-0.386717	-1.69251	-1.17	-0.169992	-2.04383	-1.18	0.078338	-2.39
Graptemys_geographica	4.88	1.49	-2.79	-4.21	-2.98	2.98	4.79	1.39	-2.75	4.20581	0.860759	-2.45545	3.63728	0.292798	-2.20324	3.02725	-0.178505	-1.86435	2.39062	-0.553043	-1.46237	1.77482	-0.96025	-1.10937	1.1368	-1.36213	-0.749115	0.483653	-1.67449	-0.327602	-0.177775	-1.96503	0.094742	-0.846788	-2.208	0.536392	-1.52867	-2.46717	0.939352	-2.21492	-2.72746	1.34932	-2.87688	-2.93738	1.81951	-3.48283	-2.86	2.35426	-4.12
Clemmys_guttata	1.82	-0.71	2.76	-1.33	0.848	-2.98	1.81	-0.741	2.72	1.6461	-0.911819	2.28524	1.4494	-0.996647	1.84234	1.19935	-0.927741	1.41914	0.940345	-0.799607	1.01558	0.691247	-0.668013	0.60493	0.451088	-0.561336	0.1818	0.211273	-0.412851	-0.223768	-0.0204484	-0.310797	-0.642034	-0.257654	-0.194338	-1.06426	-0.478606	-0.120676	-1.50427	-0.684072	-0.0176333	-1.94425	-0.883847	0.143399	-2.3688	-1.09365	0.459205	-2.68365	-1.3
Deirochelys_reticularia	5.54	-1.77	-0.767	-4.59	-1.2	-2.16	5.46	-1.84	-0.811	4.88663	-2.28891	-1.11076	4.24745	-2.6617	-1.38085	3.57472	-2.98611	-1.62306	2.82144	-3.11	-1.80078	2.04387	-3.11	-1.92419	1.26563	-3.07371	-2.04258	0.48818	-3.02245	-2.16511	-0.287466	-2.9427	-2.2773	-1.06521	-2.86062	-2.37938	-1.84456	-2.76818	-2.44	-2.61671	-2.61855	-2.43618	-3.30475	-2.24893	-2.37316	-3.92977	-1.77895	-2.28128	-4.52
Malaclemys_terrapin	-1.81	-0.329	2.26	1.77	1.35	-2	-1.78	-0.317	2.21	-1.62131	-0.501901	1.83262	-1.43611	-0.669539	1.46018	-1.18778	-0.680296	1.11778	-0.881787	-0.480411	0.85427	-0.592947	-0.306213	0.553567	-0.326044	-0.139417	0.23026	-0.0569545	-0.0127641	-0.107928	0.220363	0.07665	-0.451065	0.499598	0.177794	-0.791609	0.769051	0.272079	-1.14184	1.04097	0.353325	-1.49162	1.30762	0.543703	-1.77508	1.54448	0.901759	-1.91298	1.75
Kinosternon_baurii	0.719	-1.45	2.24	2.45	-0.176	-2.6	0.732	-1.49	2.21	0.873584	-1.64099	1.87703	0.994985	-1.72	1.51412	1.12133	-1.60867	1.16312	1.23558	-1.48884	0.806076	1.34564	-1.35436	0.453201	1.45943	-1.23057	0.0970337	1.57875	-1.13094	-0.265653	1.70207	-1.04698	-0.630483	1.82527	-0.976892	-0.99802	1.95009	-0.937949	-1.37023	2.07379	-0.865451	-1.73791	2.20211	-0.761684	-2.09421	2.31807	-0.515418	-2.37226	2.44
Emydoidea_blandingii	2.28	0.34	-2.36	-3.88	-1.1	0.185	2.18	0.312	-2.33	1.8042	0.081235	-2.26168	1.35089	0.00633402	-2.10436	0.901682	-0.073007	-1.9394	0.457467	-0.195122	-1.78554	0.0303983	-0.321478	-1.5936	-0.377045	-0.440704	-1.36648	-0.799059	-0.468993	-1.13997	-1.23838	-0.569597	-0.990485	-1.67857	-0.654857	-0.811621	-2.1096	-0.730921	-0.601191	-2.53133	-0.849651	-0.391964	-2.9719	-0.971841	-0.228064	-3.40074	-1.08	-0.0365106	-3.82
Eretmochelys_imbricata	-3.7	-2.08	-42.2	-2.19	12.6	-64.4	-3.7	-1.96	-42.6	-3.5992	-0.657706	-44.012	-3.50143	0.590341	-45.4786	-3.39119	1.94126	-46.8321	-3.26469	3.32373	-48.1531	-3.21868	4.28868	-49.6736	-3.25	4.81745	-51.5055	-3.24	5.68301	-53.21	-3.0796	6.8676	-54.652	-2.89272	8.1423	-56	-2.78486	9.52971	-57.1486	-2.70114	10.2	-58.8886	-2.53417	10.8722	-60.6444	-2.37476	11.6016	-62.4033	-2.22
Geochelone_elegans	2.24	1.13	-1.06	-3.03	0.401	0.0663	2.18	1.1	-1.08	1.89823	0.85784	-1.2	1.52157	0.715915	-1.18974	1.13585	0.596706	-1.16512	0.746114	0.511412	-1.1	0.355979	0.430168	-1.03234	-0.0319728	0.371042	-0.937447	-0.415951	0.32451	-0.836009	-0.804522	0.254526	-0.756255	-1.19578	0.22337	-0.657633	-1.5924	0.171633	-0.589393	-1.98376	0.170437	-0.482434	-2.36664	0.185931	-0.349344	-2.73938	0.217938	-0.192473	-3.02
Chelonia_mydas	69.5	-2.9	-163	16.5	45.3	-146	69.5	-2.41	-163	67.5696	2.54694	-162	64.889	7.0587	-161	61.1628	10.8779	-160	56.8601	13.82	-158.9	52.7926	16.3037	-157	47.4851	18.9537	-157	43.6271	21.5864	-155.068	40.1208	25.439	-154	37.3352	29.9747	-153	34.6987	33.7013	-151	31.4462	37.7538	-150	27.3491	41.317	-149	22.4706	43.8269	-148	17.2
Actinemys_marmorata	-0.148	-0.411	3.4	3.14	0.777	-2.58	-0.127	-0.431	3.37	0.0365744	-0.730556	3.00148	0.265514	-0.816656	2.54932	0.510391	-0.725036	2.10307	0.758403	-0.598067	1.66689	1.00037	-0.478253	1.22515	1.23769	-0.347914	0.784333	1.46507	-0.179958	0.352024	1.71106	-0.132894	-0.0990313	1.9589	-0.0848507	-0.550897	2.20582	-0.0256834	-1.00212	2.46169	0.0317346	-1.44753	2.71635	0.121017	-1.88794	2.95708	0.352906	-2.27561	3.13
Terrapene_carolina	-1.41	-1.6	2.37	3.08	-0.719	-1.92	-1.34	-1.63	2.3	-1.04814	-1.73598	1.98814	-0.723221	-1.73848	1.69089	-0.402904	-1.69288	1.39019	-0.0855334	-1.62621	1.09105	0.228673	-1.54605	0.79192	0.54268	-1.45975	0.494346	0.854619	-1.35354	0.202496	1.17732	-1.31378	-0.0931342	1.51031	-1.25661	-0.377927	1.83625	-1.2	-0.670417	2.15223	-1.14463	-0.97223	2.46064	-1.07645	-1.28064	2.75861	-0.972745	-1.58861	3.03
Testudo_graeca	3.89	-2.07	3.75	-3.84	1.41	-3.59	3.87	-2.15	3.67	3.4909	-2.5039	3.02699	2.96277	-2.54319	2.37277	2.3808	-2.293	1.8156	1.80028	-1.87143	1.36771	1.23354	-1.50824	0.872539	0.6499	-1.13113	0.389617	0.0739449	-0.809889	-0.130726	-0.496486	-0.640369	-0.730993	-1.04477	-0.514332	-1.36334	-1.58733	-0.361845	-1.99522	-2.1571	-0.228391	-2.5971	-2.75585	0.0961666	-3.0993	-3.31446	0.628008	-3.44048	-3.78
Hydromedusa_tectifera	-1.09	3.63	-4.93	2.18	-1.86	3.29	-1.05	3.57	-4.88	-0.800954	2.92524	-4.54572	-0.577964	2.21418	-4.35282	-0.332193	1.80577	-3.75539	-0.0925641	1.48255	-3.09765	0.127466	1.15033	-2.43946	0.335248	0.824371	-1.76973	0.551303	0.416256	-1.15863	0.767113	-0.0104792	-0.55742	0.988148	-0.511501	-0.0127673	1.21284	-0.970682	0.565099	1.4536	-1.416	1.1472	1.70324	-1.78549	1.77423	1.8907	-1.71643	2.51496	2.15
Orlitia_borneensis	4.41	1.23	-7.16	-2.15	-5.6	4.54	4.35	1.13	-7.06	3.96938	0.274879	-6.49289	3.55163	-0.522227	-5.85745	3.08385	-1.22661	-5.15339	2.57796	-1.84204	-4.39595	2.08963	-2.33822	-3.55318	1.64247	-2.85753	-2.73245	1.15648	-3.37693	-1.90966	0.691748	-3.6165	-1.0135	0.23976	-4.24249	-0.377519	-0.235347	-4.70555	0.496298	-0.707213	-5.07454	1.40344	-1.18018	-5.35008	2.36035	-1.63127	-5.50516	3.35286	-2.07
Cuora_amboinensis	3.78	-0.735	-3.61	-3.43	-2.66	2.73	3.71	-0.764	-3.54	3.22837	-1.09582	-3.21628	2.71464	-1.32801	-2.80332	2.19317	-1.54473	-2.39053	1.66329	-1.71934	-1.97263	1.14004	-1.88999	-1.54503	0.620202	-2.02997	-1.10017	0.111714	-2.13398	-0.643103	-0.406319	-2.29534	-0.211118	-0.927392	-2.41174	0.239783	-1.44845	-2.53169	0.688945	-1.96085	-2.62017	1.15068	-2.46233	-2.68748	1.63233	-2.93888	-2.72	2.14203	-3.37
Notochelys_platynota	5.72	-4.11	3.51	-3.56	1.41	-5.83	5.59	-4.04	3.46	4.83955	-3.76	3.07717	4.11259	-3.66452	2.36485	3.4355	-3.39275	1.65004	2.80138	-3.02297	0.939046	2.21539	-2.62577	0.198466	1.60606	-2.2084	-0.508405	0.963067	-1.84752	-1.21242	0.317209	-1.42109	-1.83426	-0.344578	-1.03823	-2.51411	-0.994943	-0.685372	-3.22169	-1.643	-0.28413	-3.903	-2.27361	0.175849	-4.56361	-2.88899	0.725067	-5.16899	-3.47
Cyclemys_dentata	-6.5	1.29	-3.93	3.97	-1.13	1.55	-6.46	1.21	-3.94	-5.8264	0.649718	-3.7252	-5.12817	0.182289	-3.47908	-4.36281	-0.0393768	-3.10792	-3.5803	-0.212698	-2.74515	-2.80395	-0.358059	-2.35697	-2.02564	-0.496762	-1.96782	-1.25774	-0.640686	-1.56402	-0.494281	-0.817496	-1.17566	0.272599	-0.974695	-0.770609	1.04477	-1.15675	-0.388193	1.81854	-1.33571	-0.00655343	2.58182	-1.46576	0.410367	3.2885	-1.39471	0.920919	3.9
Batagur_dhongoka	4.76	-0.856	-2.67	-4.18	-0.486	-3.6	4.66	-0.878	-2.7	4.04331	-0.973605	-2.84801	3.43528	-1.09342	-2.99894	2.81563	-1.18	-3.12644	2.18137	-1.18	-3.19096	1.54716	-1.21	-3.26587	0.91252	-1.21	-3.35522	0.292971	-1.18	-3.45616	-0.339344	-1.13121	-3.54	-0.973179	-1.11	-3.6	-1.60927	-1.11	-3.64785	-2.2432	-1.06904	-3.67	-2.85581	-0.887964	-3.65	-3.47151	-0.710699	-3.63	-4.08
Vijayachelys_silvatica	2.2	0.78	-2.84	-2.18	-1.91	1.14	2.19	0.742	-2.85	1.95395	0.312906	-2.83197	1.67901	-0.0474704	-2.65267	1.38965	-0.254243	-2.31448	1.09377	-0.399364	-1.94377	0.779385	-0.541419	-1.58671	0.444436	-0.688823	-1.25041	0.105504	-0.743024	-0.90455	-0.230818	-1.01644	-0.677014	-0.596296	-1.24657	-0.430882	-0.948591	-1.52353	-0.217337	-1.30558	-1.78846	0.00633934	-1.65605	-2.01042	0.277011	-1.95134	-2.03	0.669017	-2.17
Melanochelys_trijuga	4.49	0.34	-1.35	-4.31	-1.31	-0.343	4.47	0.298	-1.38	3.94851	-0.0579331	-1.5823	3.34863	-0.322972	-1.67438	2.69637	-0.465623	-1.64974	2.04258	-0.603431	-1.62	1.38948	-0.74655	-1.6	0.736516	-0.891997	-1.59	0.105372	-0.999	-1.47805	-0.528725	-1.12525	-1.46475	-1.16876	-1.21	-1.30966	-1.81197	-1.30723	-1.16416	-2.45765	-1.40961	-1.03039	-3.10441	-1.50068	-0.891016	-3.72917	-1.50771	-0.666645	-4.29
Caretta_caretta	6.14	1.18	-106	-9.93	-18.5	-90.5	5.95	0.847	-106	4.56135	-1.34787	-106	3.33575	-3.27022	-106.471	2.53344	-4.50084	-106	1.135	-6.68701	-106	0.0635467	-8.14968	-105.002	-1.11183	-9.47351	-104	-2.26915	-10.8559	-103	-3.1454	-12.0794	-101.603	-4.2435	-13.6058	-100.647	-5.34101	-15.1246	-99.2754	-6.45266	-16.3855	-97.3289	-7.61475	-17.0942	-95.2117	-8.76003	-17.6846	-93.0461	-9.8
Dogania_subplana	-2.77	-4.24	5.19	-2.86	5.3	-4.06	-2.76	-4.21	5.02	-2.7309	-3.87542	4.12354	-2.70238	-3.44908	3.26338	-2.69	-2.96347	2.43485	-2.71207	-2.37756	1.67549	-2.73174	-1.7361	0.961057	-2.75	-1.01591	0.326723	-2.76	-0.271871	-0.280887	-2.76738	0.421527	-0.946003	-2.77	1.08801	-1.63801	-2.76	1.80532	-2.27532	-2.77	2.56558	-2.85865	-2.79989	3.38915	-3.34958	-2.82	4.27557	-3.71798	-2.85
Heosemys_spinosa	6.21	1.67	3.51	-5.75	4.48	-0.204	6.18	1.76	3.52	5.58076	2.50363	3.49439	4.77594	2.96081	3.28838	3.88999	3.13667	2.97666	2.99802	3.24133	2.64601	2.08417	3.34948	2.38156	1.17729	3.50182	2.11637	0.280618	3.68293	1.83707	-0.592782	3.94025	1.56987	-1.46031	4.24344	1.29656	-2.34567	4.54088	1.08608	-3.22538	4.86327	0.88527	-4.10478	5.12164	0.605239	-4.9708	5.01307	0.243526	-5.68
Chelus_fimbriata	5.4	-0.935	-0.872	-5.85	-1.75	0.427	5.26	-1.01	-0.892	4.45778	-1.29095	-0.943643	3.65849	-1.58076	-1.00022	3.06015	-2.05002	-1.14004	2.24278	-1.92	-0.968133	1.40044	-1.87511	-0.8656	0.559974	-1.8619	-0.748795	-0.277494	-1.88019	-0.637884	-1.11757	-2.01454	-0.588122	-1.95843	-2.13979	-0.528157	-2.79569	-2.25734	-0.429798	-3.57772	-2.58	-0.40697	-4.19221	-2.17593	-0.133743	-4.97756	-1.96124	0.102418	-5.76
Macrochelys_temminckii	21.9	7.29	-61.5	3.6	12.6	-88.1	21.8	7.39	-61.8	20.7767	7.13	-63.835	19.7017	7.11009	-65.8974	18.578	7.41307	-67.8441	17.4388	8.21737	-69.6837	16.1073	8.79855	-71.4891	14.7861	9.10556	-73.3708	13.4062	9.35815	-75.2407	11.9924	9.70227	-77.0613	10.6091	10.0954	-78.8909	9.35605	10.6	-80.7512	8.0522	10.9	-82.6268	6.66699	11.2	-84.4472	5.20877	11.5956	-86.1912	3.8
Malacochersus_tornieri	0.497	-2.46	3.32	-0.35	2.57	-3.44	0.487	-2.47	3.15	0.43308	-2.30632	2.5708	0.370823	-1.99614	2.05817	0.300525	-1.56078	1.64894	0.253342	-1.24006	1.1401	0.208281	-0.818554	0.712762	0.163	-0.337551	0.349368	0.121701	0.118774	-0.0445375	0.0828414	0.364533	-0.592111	0.0270365	0.580893	-1.15417	-0.00421349	0.944441	-1.63026	-0.0719175	1.25106	-2.14075	-0.186873	1.53038	-2.66357	-0.271044	1.91696	-3.11696	-0.333
Malayemys_subtrijuga	-1.68	-3.43	1.8	2.33	-0.0281	-3.15	-1.66	-3.45	1.74	-1.45775	-3.48	1.24292	-1.24535	-3.5	0.746158	-0.968462	-3.35397	0.321653	-0.670504	-3.10081	-0.0522416	-0.374173	-2.8147	-0.405886	-0.0730661	-2.54214	-0.766623	0.231467	-2.24406	-1.09875	0.536249	-2.04024	-1.48976	0.855092	-1.76865	-1.83202	1.17872	-1.53752	-2.19872	1.47554	-1.32446	-2.59554	1.77762	-0.999956	-2.89381	2.05335	-0.557641	-3.02778	2.3
Indotestudo_elongata	-6.71	-0.684	-4.55	3.4	-4.91	5.97	-6.66	-0.788	-4.54	-6.08358	-1.80284	-4.27343	-5.40165	-2.61022	-3.78165	-4.57519	-2.85	-2.95959	-3.82317	-2.74772	-2.03476	-3.12313	-2.6	-1.07545	-2.38261	-2.62831	-0.13722	-1.602	-2.92511	0.716709	-0.82801	-3.4213	1.4813	-0.10773	-4.12159	2.12579	0.566223	-4.924	2.70644	1.26143	-5.63555	3.37143	2.03647	-6	4.1983	2.72467	-5.59955	5.06201	3.34
Pangshura_tentoria	5.22	-3.13	2.65	-5.09	-0.409	-3.54	5.15	-3.18	2.58	4.50769	-3.46712	1.99577	3.76972	-3.54863	1.48383	2.98534	-3.37845	1.04221	2.18696	-3.20087	0.630848	1.38482	-3.05096	0.213697	0.604739	-2.96217	-0.259403	-0.0375573	-2.79084	-0.700423	-0.776751	-2.60731	-1.19484	-1.51859	-2.35047	-1.66906	-2.26095	-2.11302	-2.15136	-3.00356	-1.93433	-2.65745	-3.74755	-1.70049	-3.12853	-4.43529	-1.20034	-3.42655	-5.02
Morenia_petersi	4.57	0.0796	-1.44	-2.95	-1.77	1.42	4.52	0.0256	-1.47	4.08151	-0.405486	-1.5837	3.60596	-0.806936	-1.60649	3.06497	-1.07584	-1.47832	2.49572	-1.24238	-1.28286	1.93959	-1.39612	-1.04184	1.38252	-1.56624	-0.809132	0.809015	-1.66112	-0.57829	0.226293	-1.79587	-0.397866	-0.356804	-1.90462	-0.195987	-0.93204	-2.01653	0.0167417	-1.49641	-2.1288	0.258444	-2.03185	-2.15704	0.57678	-2.49505	-2.02247	0.96756	-2.91
Geoemyda_spengleri	-0.0506	1.74	-2.79	-1.65	-0.259	2.76	-0.0604	1.64	-2.78	-0.113157	1.19306	-2.63948	-0.194467	0.824328	-2.35511	-0.31194	0.588414	-1.96353	-0.449967	0.424033	-1.54101	-0.587398	0.284589	-1.10888	-0.728543	0.143912	-0.678463	-0.865493	0.00955752	-0.245649	-1.0089	-0.167666	0.167288	-1.14824	-0.352659	0.580674	-1.27666	-0.510996	1.00866	-1.3952	-0.648327	1.44602	-1.49054	-0.708676	1.90378	-1.58004	-0.588874	2.35027	-1.65
Manouria_impressa	0.77	-5.8	7.41	1.62	1.33	-9.23	0.763	-5.93	7.27	0.814463	-6.5061	6.01684	0.909079	-6.6556	4.64822	1.01034	-6.32863	3.3059	1.12759	-5.84964	2.00893	1.21418	-5.35908	0.713949	1.28	-4.83596	-0.569695	1.35	-4.29145	-1.8418	1.42309	-3.68215	-3.0857	1.52252	-3.12985	-4.35535	1.62234	-2.5489	-5.6122	1.69924	-1.96534	-6.86933	1.74	-1.20649	-8.02351	1.72019	-0.085673	-8.82905	1.63
Platemys_platycephala	4.9	1.86	-2.49	-1.86	-1.47	2.03	4.85	1.79	-2.5	4.5074	1.24836	-2.52548	4.11444	0.743369	-2.49148	3.63065	0.440138	-2.20752	3.13263	0.2365	-1.85553	2.63873	0.0721295	-1.47748	2.1413	-0.0906707	-1.10093	1.64622	-0.297892	-0.74346	1.15832	-0.547819	-0.404971	0.679805	-0.853582	-0.100506	0.208684	-1.19417	0.179783	-0.276217	-1.50724	0.466057	-0.768874	-1.76514	0.788506	-1.22808	-1.78596	1.21808	-1.63
Trachemys_scripta	6.55	-1.61	-0.445	-4.68	0.332	-3.35	6.47	-1.69	-0.483	5.72986	-2.06369	-0.757594	4.93075	-2.297	-1.02525	4.11013	-2.42248	-1.28745	3.28384	-2.35548	-1.55904	2.45394	-2.24739	-1.80782	1.61757	-2.13751	-2.03748	0.784701	-2.00193	-2.25807	-0.0408219	-1.82694	-2.47306	-0.870199	-1.64043	-2.67957	-1.70263	-1.4711	-2.8889	-2.52215	-1.22558	-3.07331	-3.31649	-0.907189	-3.25027	-4.01811	-0.395134	-3.33	-4.63
Glyptemys_insculpta	0.0523	1.93	-6.19	-2.93	-2.59	3.07	0.0327	1.82	-6.17	-0.118671	1.08422	-5.89711	-0.317117	0.510124	-5.38599	-0.547973	0.0913429	-4.75008	-0.753852	-0.216374	-4.03716	-0.975312	-0.39412	-3.29455	-1.19975	-0.571702	-2.54424	-1.43895	-0.900108	-1.85684	-1.67527	-1.33054	-1.22183	-1.89694	-1.80389	-0.612813	-2.11885	-2.22827	0.0308745	-2.34288	-2.58813	0.711405	-2.56001	-2.82334	1.44669	-2.75745	-2.84255	2.21727	-2.91
Chrysemys_picta	-3.99	-0.854	1.45	4.51	0.0771	-0.758	-3.94	-0.874	1.41	-3.47178	-1.11929	1.03143	-2.94522	-1.27	0.682145	-2.34364	-1.23	0.440001	-1.72084	-1.12583	0.269501	-1.09318	-1.03331	0.108298	-0.461728	-0.942938	-0.0387347	0.171168	-0.845	-0.167394	0.801825	-0.799315	-0.335085	1.43411	-0.744015	-0.495102	2.06461	-0.696814	-0.662382	2.69878	-0.647122	-0.81672	3.32983	-0.528784	-0.919717	3.9167	-0.244763	-0.87933	4.48
Proganochelys_quenstedti	-11.9	19.1	-16.9	12.6	-9.72	22.5	-11.7	18.5	-16.6	-10.0373	15.0746	-15.1373	-8.43042	11.6295	-13.6432	-6.6488	8.40669	-11.9697	-4.99619	5.57389	-10.0662	-3.16224	3.36879	-7.14172	-1.21389	1.22595	-4.2416	0.629638	-0.962487	-1.30642	2.50213	-3.14015	1.6182	4.39133	-5.29666	4.54732	5.89256	-6.74535	7.90373	7.55875	-8.60906	11.0477	9.324	-9.40554	14.6369	11.0581	-9.72257	18.2904	12.5
Proterochersis_robusta	10.9	-1.09	-56.6	-13.6	-2.03	-57	10.7	-1.2	-56.6	9.16276	-2.10069	-56.8	7.46456	-2.78309	-56.8	5.70707	-2.7455	-57	3.92121	-2.46624	-56.9	2.14792	-2.00798	-56.9	0.410099	-1.50276	-56.8	-1.25112	-0.861193	-56.8569	-2.87073	-1.39296	-57.1	-4.52845	-2.0994	-57.2	-6.20142	-2.71706	-57.4	-7.96873	-3.18816	-57.4	-9.78369	-3.25974	-57.3	-11.5773	-2.9968	-57.2	-13.2
Plesiochelys_bigleri	44.6	-161	22.9	2.34	134	-119	43.6	-158	20.5	37.783	-144.766	1.77532	32.7996	-126.998	-13.0012	29.8975	-106.488	-24.1074	27.6025	-84.0256	-31.2934	25.1662	-61.0732	-37.1121	22.8349	-38.3661	-43.6082	20.525	-16.5003	-52.425	16.5416	2.74789	-65.3044	12.8457	21.5577	-79.2899	9.02022	40.4316	-93.2544	5.36403	60.3741	-105.324	2.80197	81.9562	-114.776	2.204	105.3	-118.66	2.42
[truncated: 92 more columns]

## Sheet: SET4
	V1	V2	V3	V4	V5	V6	V7	V8	V9	V10	V11	V12	V13	V14	V15	V16	V17	V18	V19	V20	V21	V22	V23	V24	V25	V26	V27	V28	V29	V30	V31	V32	V33	V34	V35	V36	V37	V38	V39	V40	V41	V42	V43	V44	V45	V46	V47	V48	V49
Dermatemys_mawi	-0.353	-2.16	11.4	-0.478	3.16	-12.3	-0.581	0.367	-8.6	-0.212	-5.78	9.69	-0.334	-1.92	11.3	-0.27566	-1.21089	10.7686	-0.217838	-0.441776	10.324	-0.168984	0.282791	9.80364	-0.132152	0.953967	9.20811	-0.122	1.52559	8.51661	-0.125	2.02166	7.76723	-0.117332	2.48224	6.99551	-0.0928441	2.9076	6.2048	-0.0765618	3.29382	5.39331	-0.0849524	3.57433	4.5463	-0.10157	3.8714	3.69764	-0.118309
Staurotypus_triporcatus	-8.66	3	-2.78	9.85	-0.297	5.46	5.83	-2.85	2.4	-6.37	-0.134	-2.84	-8.57	3.11	-2.69	-7.96629	3.30983	-2.28577	-7.32032	3.42993	-1.91018	-6.68456	3.58925	-1.53151	-6.06034	3.7986	-1.15772	-5.46805	4.08797	-0.787911	-4.83811	4.27865	-0.423083	-4.19112	4.41119	-0.0539203	-3.53861	4.49438	0.320641	-2.87442	4.53	0.682459	-2.20358	4.54	1.03344	-1.52997	4.49	1.36502	-0.850211
Claudius_angustatus	4.86	0.805	1.63	-4.02	2.21	-1.24	-2.56	-0.39	-1.16	3.44	-0.853	0.823	4.82	0.857	1.62	4.58702	1.10839	1.5654	4.33394	1.33764	1.51079	4.05902	1.54678	1.4558	3.78659	1.75561	1.3922	3.49736	1.94151	1.32924	3.20568	2.12288	1.26428	2.89106	2.25128	1.18745	2.56953	2.34682	1.09318	2.25042	2.45319	0.997765	1.93027	2.55189	0.898702	1.61021	2.64993	0.798062	1.29322
Sacalia_quadriocellata	2.82	-0.771	1.6	-3.25	1.37	-2.19	-2.41	0.471	-2.06	2.4	-2.04	0.646	2.78	-0.711	1.6	2.57753	-0.516434	1.52876	2.35908	-0.346671	1.45	2.18568	-0.114288	1.44	1.994	0.103184	1.43	1.81815	0.333188	1.44296	1.63889	0.558686	1.44578	1.41927	0.730073	1.37171	1.20718	0.914997	1.30087	0.995145	1.09988	1.23006	0.770217	1.25099	1.12901	0.540225	1.38876	1.02124	0.310333
Mauremys_reevesii	-5.4	3.07	0.0947	6.61	2.32	1.8	6.1	0.0254	0.955	-5.29	0.573	-0.833	-5.31	3.12	0.122	-4.96566	3.35167	0.261635	-4.63372	3.60017	0.404308	-4.27965	3.81772	0.54514	-3.91967	4.02016	0.692143	-3.56293	4.21853	0.85268	-3.22077	4.44462	1.00551	-2.81924	4.55297	1.12593	-2.39697	4.6205	1.22101	-1.98137	4.70675	1.32675	-1.57545	4.82702	1.44052	-1.16303	4.91628	1.54628	-0.737169
Apalone_mutica	3.69	3.78	-4.26	-1.98	-1.87	5.24	0.0678	-0.765	2.32	3.65	2.42	-4.9	3.66	3.78	-4.17	3.47405	3.74351	-3.7781	3.27393	3.58393	-3.42938	3.0825	3.45313	-3.06813	2.91655	3.45	-2.66638	2.74117	3.39029	-2.27263	2.55992	3.28994	-1.88984	2.3689	3.1526	-1.5241	2.17872	3.01936	-1.15776	1.97887	2.87165	-0.801468	1.77506	2.71205	-0.451799	1.57359	2.54487	-0.104165	1.3672
Pelusios_situatus	-14.3	3.55	-5.17	16.7	-2.44	5.05	13.3	-5.73	2.58	-15.3	0.897	-6.86	-14.2	3.68	-5.1	-13.2698	4.33718	-4.52584	-12.2932	4.88547	-3.91248	-11.3519	5.38164	-3.20355	-10.3819	5.90903	-2.54917	-9.39359	6.46093	-1.91998	-8.36004	6.92735	-1.29897	-7.25805	7.22572	-0.691787	-6.10269	7.37533	-0.121993	-4.94439	7.50958	0.446973	-3.78418	7.63337	1.00835	-2.60314	7.68351	1.53895	-1.40719
Elseya_novaeguineae	-5.68	4.71	-2.78	6.36	-4.36	4.65	4.44	-4.58	1.94	-5.87	2.19	-5.16	-5.62	4.71	-2.7	-5.18857	4.61232	-2.26857	-4.77466	4.57	-1.81159	-4.35998	4.536	-1.35597	-3.94074	4.48407	-0.903778	-3.50798	4.37539	-0.475796	-3.07871	4.26218	-0.0448014	-2.6609	4.16909	0.396647	-2.211	4.0084	0.78933	-1.75927	3.82404	1.16954	-1.36877	3.60939	1.59476	-0.956335	3.35837	1.97028	-0.483887
Chelydra_serpentina	1.23	0.45	-12.2	0.877	-0.244	11.5	0.928	3.54	6.72	1.33	6.35	-12.6	1.23	0.37	-12.1	1.20298	0.274636	-11.2298	1.2	0.101498	-10.3685	1.23	-0.114177	-9.51544	1.27914	-0.417224	-8.68944	1.25624	-0.74728	-7.87368	1.20918	-1.01164	-7.0518	1.18	-1.25515	-6.20617	1.19	-1.49535	-5.35883	1.21	-1.72759	-4.50965	1.22	-1.93909	-3.65395	1.17339	-2.12661	-2.79697	1.1
Carettochelys_insculpta	-12.1	-19.1	30.5	7.8	13.5	59.9	-1.01	10	54.1	-20.5	-14.4	30.1	-11.9	-19.2	30.6	-10.274	-19.1	31.363	-8.67269	-19	32.2108	-7.07954	-18.9397	33.0603	-5.5665	-18.7	33.9903	-4.15263	-18.1454	34.9546	-2.80179	-17.4513	35.9487	-1.55244	-16.6931	37.0069	-0.401992	-15.8019	38.0981	0.707867	-14.8928	39.2145	1.70305	-13.9093	40.3907	2.62157	-12.8237	41.5526	3.46679
Emys_orbicularis	-4.08	3.08	0.289	6.5	0.805	1.08	5.86	-0.376	0.292	-4.1	1.06	-1.09	-3.97	3.13	0.327	-3.62886	3.30464	0.44562	-3.27607	3.45506	0.563938	-2.91898	3.59034	0.687341	-2.55161	3.6896	0.814417	-2.17623	3.74	0.945255	-1.79519	3.75831	1.06662	-1.40764	3.76	1.1678	-1.01737	3.74	1.25033	-0.624064	3.72	1.32203	-0.230298	3.70242	1.39516	0.164488	3.67886	1.46229	0.558856
Pelomedusa_subrufa	-5.02	2.3	-0.583	5.4	-0.375	2.69	3.53	-0.791	1.63	-4.96	1.39	-0.808	-4.98	2.32	-0.55	-4.63822	2.43636	-0.337108	-4.28642	2.54679	-0.140851	-3.92773	2.67045	0.0399154	-3.55274	2.74745	0.217887	-3.16928	2.79014	0.385347	-2.80717	2.88571	0.573272	-2.42723	2.91	0.746832	-2.03876	2.92969	0.894587	-1.66832	2.91542	1.09084	-1.29363	2.95327	1.27655	-0.907692	2.9579	1.43581	-0.526404
Psammobates_tentorius	-0.19	3.96	-3.74	-0.21	-2.45	3.61	-0.205	-2.14	2.17	-0.329	2.14	-5.05	-0.185	3.98	-3.72	-0.157557	4.13628	-3.22115	-0.124789	4.38141	-2.74578	-0.116	4.58539	-2.24766	-0.107884	4.9241	-1.8559	-0.0934125	5.0415	-1.38725	-0.0661912	4.90847	-0.924888	-0.0578661	4.99	-0.393364	-0.0582848	5.16854	0.11494	-0.055741	5.15112	0.59503	-0.0457632	4.68172	0.836334	-0.0329607	4.3607	1.22581	-0.012574
Homopus_femoralis	-0.555	5.02	-2.47	1.44	-1.58	2.96	1.09	-0.963	2.12	-0.551	3.58	-3.4	-0.547	5.03	-2.43	-0.483348	5.05	-2.07674	-0.410341	4.98	-1.73799	-0.342682	4.90951	-1.38853	-0.280382	4.81	-1.04691	-0.213181	4.77	-0.694887	-0.131025	4.68128	-0.353614	-0.0608954	4.51561	-0.0390834	0.0273727	4.30946	0.240319	0.133071	4.10822	0.522989	0.235498	3.93909	0.828017	0.324101	3.72966	1.11034	0.404303
Kinixys_belliana	-0.783	4.93	-4.12	0.694	-3.42	5.01	0.54	-2.69	3.8	-0.898	2.83	-5.92	-0.781	4.93	-4.06	-0.749354	4.94	-3.53708	-0.710475	4.91184	-2.99844	-0.668511	4.91163	-2.46186	-0.628904	5.08055	-1.94904	-0.576919	5.25453	-1.44373	-0.5241	5.20367	-0.909467	-0.468918	5.03705	-0.39966	-0.405399	4.848	0.104016	-0.343064	4.60021	0.581517	-0.28212	4.40851	1.08447	-0.218052	4.2155	1.58049	-0.142469
Rafetus_euphraticus	-5.35	-4.21	10.6	7.68	13.6	-11.3	4.63	5.49	-9.49	-6.22	-10.4	8.26	-5.3	-4.06	10.6	-4.85734	-3.21468	10.1289	-4.37803	-2.34091	9.68545	-3.87643	-1.50919	9.16643	-3.35412	-0.759989	8.54265	-2.82105	-0.0156633	7.91881	-2.30002	0.721473	7.27752	-1.77365	1.43544	6.61456	-1.26292	2.16053	5.95602	-0.76532	2.90879	5.31945	-0.284222	3.62173	4.62175	0.196369	4.35567	3.94433	0.660148
Platysternon_megacephalum	3.89	0.568	-2.32	-5.28	-1.44	3.27	-3.28	0.277	3.21	4.03	3.14	-0.288	3.83	0.519	-2.3	3.52331	0.314036	-2.20428	3.20398	0.138078	-2.08828	2.87553	-0.0159969	-1.97138	2.54278	-0.18066	-1.87819	2.20356	-0.302699	-1.75178	1.88576	-0.359847	-1.55051	1.56595	-0.427902	-1.3522	1.24868	-0.523567	-1.16038	0.925129	-0.632849	-0.989077	0.604582	-0.726391	-0.801242	0.284638	-0.802973	-0.606523	-0.0403752
Pelodiscus_sinensis	-0.793	-0.0735	3.81	2.16	5.27	-7.43	1.42	3.27	-4.99	-1.36	-3.27	3.35	-0.754	-6.42e-05	3.8	-0.670593	0.473814	3.79	-0.578533	0.920435	3.66586	-0.470475	1.28508	3.36647	-0.361315	1.63228	3.04576	-0.252863	1.97254	2.71746	-0.144353	2.28653	2.36451	-0.0310861	2.61656	2.02726	0.0866389	2.93271	1.67841	0.205157	3.24039	1.32259	0.325244	3.53395	0.955268	0.447397	3.82279	0.584953	0.568149
Stigmochelys_pardalis	0.174	8.17	-5.81	-0.81	-6.32	9.14	-0.404	-5.06	5.77	0.479	5.8	-8.41	0.169	8.26	-5.71	0.056414	8.63243	-4.78817	-0.0463545	8.9888	-3.85886	-0.125934	9.32105	-2.91961	-0.212881	9.69207	-1.99482	-0.288687	9.61313	-1.02782	-0.379761	9.39839	-0.0615634	-0.452675	9.4287	0.927188	-0.521075	9.33407	1.91668	-0.570626	8.83449	2.77402	-0.667531	8.32695	3.62609	-0.78003	7.98162	4.55611	-0.883496
Dermochelys_coriacea	3.82	3.3	0.758	-7.68	1.37	2.7	-5.47	-0.72	1.99	4.95	-0.325	-0.179	3.75	3.37	0.783	3.42398	3.61157	0.896228	3.03436	3.75014	0.992113	2.62311	3.82538	1.06769	2.21662	3.90834	1.15668	1.79992	3.94	1.2282	1.3882	3.98036	1.31036	0.976622	4.01	1.40305	0.564246	4.01561	1.48841	0.15393	4.04379	1.58758	-0.260531	4.01098	1.66147	-0.672205	4.01721	1.75279	-1.08774
Chelonoidis_carbonaria	-1.49	7.49	-5.91	1.16	-5.15	9.38	0.746	-5.06	6.02	-1.66	3.19	-9.53	-1.47	7.49	-5.81	-1.45	7.15649	-5.11639	-1.3295	6.60799	-4.58648	-1.25005	6.27016	-3.89027	-1.13339	5.93016	-3.19863	-1.01765	5.58592	-2.50888	-0.934733	5.21183	-1.86199	-0.849374	5.00312	-1.12843	-0.746051	4.63448	-0.457374	-0.608232	4.33353	0.245424	-0.439	3.90144	0.81109	-0.458294	3.88043	1.54706	-0.358835
Rhinoclemmys_annulata	2.79	0.00974	5.99	-4.5	1.91	-7.62	-3.83	-0.277	-6.84	3.24	-2.61	5.9	2.77	0.0778	5.97	2.57393	0.486513	5.59786	2.44864	1.01808	5.32161	2.35387	1.5876	5.0716	2.20782	2.10654	4.74637	2.01533	2.59933	4.40683	1.77767	3.00726	3.99027	1.53202	3.33698	3.51504	1.27213	3.5334	2.99426	0.989418	3.78032	2.48935	0.700758	4.0102	1.97961	0.383433	4.26169	1.49746	0.0782444
Emydura_macquarii	-0.0915	6.04	-4.32	0.387	-4.57	7.16	0.459	-4.73	3.61	0.101	3.63	-6.13	-0.0882	6.02	-4.24	-0.0492368	5.74095	-3.76665	-0.00294724	5.51803	-3.26527	0.0499718	5.32992	-2.74977	0.0927516	5.13291	-2.23699	0.110957	4.8913	-1.74216	0.120067	4.64866	-1.24754	0.140497	4.41086	-0.750634	0.169141	4.14859	-0.266785	0.184297	3.86076	0.203011	0.165902	3.58219	0.678587	0.141786	3.26382	1.12725	0.136942
Astrochelys_radiata	5.37	1.2	0.538	-4.19	-0.13	-1.37	-3.18	-0.509	-1.48	5.28	-0.432	-0.663	5.22	1.29	0.584	4.81267	1.5084	0.687008	4.55436	1.84488	0.883247	4.31707	2.19229	1.0955	4.03479	2.52521	1.27761	3.63802	2.75599	1.3604	3.20459	2.93023	1.42511	2.79257	3.12702	1.54361	2.41028	3.35583	1.69292	1.9769	3.51924	1.76231	1.5234	3.65089	1.78	1.06701	3.74117	1.77883	0.604244
Pyxis_arachnoides	-5.38	1.5	1.96	5.77	-0.223	-1.12	4.53	-0.929	-1.54	-5.72	-1.06	0.407	-5.34	1.55	1.98	-4.88964	1.82587	2.04862	-4.39667	2.03222	2.0637	-3.94345	2.31462	2.13366	-3.56228	2.65772	2.24693	-3.15866	2.99741	2.33348	-2.67075	3.2257	2.36	-2.15852	3.39074	2.37025	-1.66678	3.59664	2.45	-1.17845	3.80462	2.50231	-0.652025	3.90557	2.47443	-0.126765	3.96686	2.41686	0.400713
Phrynops_tuberosus	-2.18	-3.44	15.9	1.76	6.58	-16.8	0.998	1.29	-12.8	-1.75	-9.27	12.6	-2.15	-3.35	15.6	-1.99564	-2.71777	14.5043	-1.88336	-1.93686	13.5168	-1.83	-1.03516	12.6463	-1.81105	-0.0879149	11.821	-1.78343	0.830905	10.9685	-1.70439	1.79299	10.1439	-1.6103	2.67726	9.23274	-1.48953	3.37141	8.17436	-1.43	3.99054	7.06921	-1.37784	4.74296	6.04272	-1.20951	5.38781	4.96073	-0.985317
Podocnemis_vogli	3.22	12.6	5	-1.9	-15.1	-5.17	-4.22	-11	-4.9	-1.42	14.7	3.23	3.28	12.5	5.01	3.53676	11.4324	4.91986	3.79798	10.3681	4.8084	4.11276	9.31171	4.75345	4.45813	8.2645	4.71297	4.78618	7.21147	4.67	5.06053	6.14733	4.57947	5.26433	5.0801	4.38654	5.46742	4.01789	4.16258	5.61368	2.95533	3.90159	5.65	1.88388	3.63924	5.64955	0.808337	3.39387	5.56185
Lissemys_punctata	-1.75	3.06	-2.64	5.01	-1.78	5.85	4.53	-2.26	4.89	-2.68	1.12	-4.13	-1.69	3.15	-2.56	-1.44672	3.24665	-2.22675	-1.19222	3.32365	-1.87491	-0.936626	3.36018	-1.51819	-0.681952	3.36568	-1.15889	-0.433721	3.36682	-0.797193	-0.186006	3.37	-0.43247	0.0587961	3.39	-0.0659495	0.310848	3.34874	0.293888	0.563439	3.2961	0.651927	0.816452	3.21995	1.00483	1.07413	3.14293	1.35266	1.32405
Chelodina_oblonga	-5.07	7.54	-4.98	6.22	-2.73	7.58	4.68	-4.01	4.07	-4.22	3.75	-5.9	-5.01	7.54	-4.88	-4.60962	7.31975	-4.34943	-4.22572	7.17905	-3.78334	-3.84828	7.11517	-3.19621	-3.46245	7.00748	-2.62159	-3.07434	6.89145	-2.0496	-2.67737	6.70825	-1.50374	-2.27262	6.41649	-1.01147	-1.86687	6.11073	-0.529476	-1.4637	5.80475	-0.0482447	-1.06392	5.5237	0.453554	-0.654948	5.25322	0.950849	-0.234129
Mesoclemmys_dahli	-5.14	0.523	5.94	6.53	5.34	-6.29	4.49	3	-5.53	-5.22	-2.85	3.16	-5.09	0.58	5.91	-4.64883	0.937756	5.59707	-4.19694	1.27306	5.27355	-3.75425	1.65575	5.01455	-3.30443	2.05846	4.77866	-2.87331	2.47669	4.53748	-2.46079	2.90401	4.2804	-2.02222	3.30822	4.03133	-1.56646	3.63354	3.70646	-1.13245	3.98004	3.36996	-0.710965	4.28683	2.98317	-0.278663	4.57679	2.59534	0.159466
Chersina_angulata	1.95	-0.58	3.85	-1.57	3.41	-4.69	-1.1	2.3	-4.03	1.76	-2.2	2.76	1.93	-0.477	3.85	1.79422	-0.0771947	3.72229	1.65799	0.324845	3.60199	1.52199	0.729449	3.48799	1.45195	1.1605	3.48805	1.38309	1.58727	3.43964	1.2651	1.95449	3.22531	1.13869	2.28262	2.96172	0.992402	2.6238	2.72772	0.838749	2.99107	2.54536	0.674198	3.30845	2.28866	0.509346	3.58109	1.98855	0.346878
Gopherus_polyphemus	-3.65	-0.928	6.87	3.85	0.977	-7.8	3.06	-0.143	-6.45	-3.65	-4.68	5.51	-3.57	-0.881	6.73	-3.23553	-0.349687	6.36961	-2.97041	0.312937	6.1852	-2.74091	0.994691	6.02069	-2.51501	1.66999	5.83376	-2.18039	2.17961	5.41847	-1.85387	2.51818	4.86182	-1.51279	2.98617	4.40348	-1.16584	3.43093	3.92553	-0.830596	3.7918	3.37579	-0.516684	4.04918	2.75786	-0.210426	4.29543	2.14457	0.165559
Sternotherus_odoratus	-2.09	3.62	-2.23	2.73	-2.27	3.44	1.88	-2.18	1.39	-1.45	1.47	-3.05	-2.06	3.64	-2.13	-1.9177	3.62508	-1.79541	-1.76171	3.56869	-1.46909	-1.60636	3.49477	-1.14591	-1.43826	3.4213	-0.829034	-1.27406	3.35851	-0.51307	-1.10509	3.26306	-0.204151	-0.936898	3.14293	0.0981747	-0.778583	3.02433	0.406789	-0.620781	2.88984	0.708745	-0.453121	2.75058	1.00268	-0.270054	2.60187	1.2822	-0.0807131
Graptemys_geographica	-4.64	4.12	-4.68	5.88	-1.42	9.14	5.41	-3.52	6.49	-4.1	0.874	-6.07	-4.59	4.17	-4.51	-4.36744	4.27128	-3.88943	-4.20647	4.56509	-3.32236	-4.03275	4.8487	-2.74679	-3.81242	5.05379	-2.15231	-3.52282	5.14388	-1.55953	-3.18728	5.14341	-0.983674	-2.81463	4.97799	-0.460821	-2.44287	4.84072	0.0757697	-2.0982	4.76117	0.641521	-1.73494	4.65831	1.1909	-1.34986	4.53397	1.71822	-0.975937
Clemmys_guttata	3.83	2.8	-1.14	-4.97	-0.79	2.43	-3.99	-1.01	1.83	3.81	1.05	-1.58	3.73	2.84	-1.09	3.39743	2.92592	-0.913897	3.05235	2.97576	-0.742447	2.70652	3.017	-0.570109	2.37247	3.09195	-0.386456	2.03337	3.13	-0.201835	1.69676	3.17703	-0.0135527	1.35557	3.17111	0.16888	1.0121	3.15202	0.347748	0.671554	3.13	0.532195	0.328585	3.11813	0.713614	-0.0231908	3.09	0.873437	-0.379874
Deirochelys_reticularia	1.87	5.34	-8.13	-1.27	-4.04	8.82	-1.09	-5.44	6.6	1.79	1.88	-9.54	1.84	5.34	-8.04	1.68899	5.32	-7.28496	1.56876	5.42248	-6.53133	1.4623	5.6513	-5.802	1.36594	5.90946	-5.08161	1.26002	6.12996	-4.35015	1.14996	6.29004	-3.60475	1.01567	6.35	-2.84837	0.910955	6.32198	-2.08559	0.817415	6.20985	-1.32938	0.721141	6.03117	-0.584615	0.610843	5.84015	0.154915	0.480825
Malaclemys_terrapin	3.19	0.509	2.87	-3.94	2.66	-2.25	-3.29	1.41	-2.47	2.9	-1.24	1.85	3.16	0.576	2.89	2.94341	0.862065	2.83736	2.73114	1.15329	2.79	2.51825	1.4501	2.74165	2.29767	1.73727	2.66753	2.07307	2.02129	2.60436	1.78799	2.18067	2.44866	1.54681	2.42399	2.3484	1.29931	2.67069	2.23466	1.03764	2.88157	2.08843	0.778332	3.04314	1.88745	0.534169	3.02594	1.61376	0.270655
Kinosternon_baurii	5.5	0.927	1.82	-3.63	0.492	-1.91	-2.66	-0.15	-1.77	5.09	-0.192	1.36	5.47	1.03	1.82	5.19138	1.28254	1.74785	4.88454	1.49859	1.66656	4.56299	1.69201	1.579	4.23145	1.86428	1.48343	3.89111	2.02323	1.39757	3.54057	2.1407	1.2893	3.20093	2.27338	1.17216	2.86022	2.39903	1.04462	2.51745	2.51524	0.912503	2.16217	2.60142	0.79051	1.7978	2.66767	0.682723	1.43032
Emydoidea_blandingii	-3.25	4.29	-3.9	2.68	-3.25	5.65	2.28	-3.38	4.67	-3.19	3.62	-4.33	-3.22	4.35	-3.83	-3.05777	4.50306	-3.35941	-2.85378	4.48749	-2.88006	-2.65327	4.55382	-2.39891	-2.43445	4.58	-1.9216	-2.22363	4.58	-1.43973	-2.01339	4.55068	-0.95933	-1.82748	4.46249	-0.476706	-1.6215	4.2972	-0.0237102	-1.39838	4.11892	0.415554	-1.16149	3.95099	0.853748	-0.927526	3.75647	1.28236	-0.695296
Eretmochelys_imbricata	-19.5	0.301	-57.9	17	-1.31	-57	10.2	2.86	-54.4	-17.6	7.01	-53.8	-19.3	0.19	-58	-18.0512	-0.0724641	-58.2	-16.7978	-0.306113	-58.4	-15.6195	-0.699099	-58.6805	-14.3573	-0.842693	-58.6	-13.0888	-1.04667	-58.7	-11.8843	-1.33313	-58.9	-10.612	-1.5088	-59	-9.33285	-1.62271	-59.1	-8.06956	-1.84744	-59.2	-6.76752	-1.88946	-59.2	-5.4888	-2.03711	-59.1	-4.19254
Geochelone_elegans	-1.17	4.14	-1.81	0.592	-1.9	2.84	0.417	-1.5	2.12	-1.12	2.8	-2.85	-1.18	4.17	-1.79	-1.13688	4.25624	-1.43753	-1.04402	4.32	-1.08004	-0.958891	4.36011	-0.717442	-0.888119	4.43	-0.353523	-0.787775	4.40778	0.0101791	-0.674043	4.28507	0.346364	-0.581591	4.22926	0.700709	-0.497626	4.14485	1.05544	-0.396533	4.0035	1.39083	-0.301914	3.81152	1.70119	-0.227286	3.63	2.0051	-0.164807
Chelonia_mydas	34.5	-7.45	-113	31.9	31.6	-211	38.6	27	-191	44.3	7.28	-115	34.1	-7.69	-113	32.3447	-8.24631	-116.184	30.9026	-8.31684	-119.658	29.6522	-7.9961	-123.239	28.8876	-7.34652	-127	28.3365	-6.25767	-130.635	27.6639	-5.32419	-134.361	27.0069	-4.23305	-137.931	26.4296	-3.28922	-141.704	25.9736	-2.15456	-145.264	25.4993	-1.078	-149.007	25.1	0.197267	-152.697	24.7
Actinemys_marmorata	4.84	1.11	2.6	-3.63	1.88	-2.31	-2.97	1.14	-2.07	4.84	-0.266	2.28	4.79	1.21	2.59	4.54775	1.44919	2.48388	4.28873	1.66127	2.35828	4.04131	1.89869	2.25565	3.77634	2.10525	2.13317	3.52279	2.32041	2.00299	3.23943	2.47692	1.85308	2.94401	2.602	1.69601	2.63785	2.67886	1.52893	2.33303	2.78109	1.37152	2.03053	2.87484	1.20527	1.71989	2.95639	1.04721	1.41384
Terrapene_carolina	3.56	0.996	3.33	-3.67	0.26	-4.23	-3.09	0.249	-3.47	3.51	0.398	3.16	3.52	1.01	3.29	3.24208	1.29479	3.09208	3.00738	1.65419	2.9479	2.78291	2.01278	2.77861	2.54512	2.35981	2.60512	2.28064	2.66936	2.40451	1.99558	2.93962	2.17798	1.67508	3.09746	1.90194	1.37392	3.27505	1.61093	1.07165	3.44917	1.31894	0.765025	3.59116	1.01392	0.452523	3.69821	0.701523	0.13939
Testudo_graeca	4.7	4.98	-2.1	-6.73	-3.46	5.68	-4.83	-2.72	4.32	4.63	1.85	-3.43	4.64	5.05	-2.01	4.24461	5.24135	-1.48327	3.76467	5.21	-0.992759	3.28667	5.25852	-0.494489	2.81374	5.33542	0.00348483	2.4461	5.63543	0.507466	2.04201	5.84911	1.02741	1.58259	5.8802	1.53721	1.11191	5.84399	2.04409	0.638652	5.85788	2.54962	0.145231	5.73495	3.00009	-0.36822	5.51826	3.40641	-0.858094
Hydromedusa_tectifera	-7.46	0.882	2.33	8.9	2.28	-3.05	5.82	1.11	-2.59	-6.53	-0.642	0.975	-7.36	0.959	2.36	-6.775	1.27292	2.39042	-6.17789	1.56605	2.38899	-5.58054	1.86152	2.37	-4.98294	2.14902	2.32823	-4.41208	2.48738	2.33	-3.83916	2.82911	2.31565	-3.24832	3.13345	2.27044	-2.63171	3.36949	2.18034	-1.99752	3.51674	2.0455	-1.36868	3.701	1.919	-0.736997	3.87147	1.7889	-0.0974384
Orlitia_borneensis	-11	5.98	-3.18	15.3	-3.03	6.99	11.8	-4.74	3.51	-10.1	1.02	-5.73	-10.9	6.07	-3.11	-10.0405	6.36496	-2.51026	-9.08287	6.40187	-1.98143	-8.22621	6.66444	-1.38414	-7.334	6.88333	-0.784463	-6.41837	7.02616	-0.197716	-5.50065	7.1599	0.387587	-4.56235	7.22134	0.939642	-3.58263	7.24174	1.41869	-2.62504	7.29342	1.94577	-1.65663	7.19386	2.45072	-0.66166	7.0174	2.8752	0.348032
Cuora_amboinensis	-4.37	4.95	-3.96	7.39	-2.67	7.79	6.34	-4.66	5.71	-5.24	1.14	-6.09	-4.28	4.96	-3.87	-3.80597	5.04289	-3.34886	-3.38326	5.23837	-2.80407	-2.97222	5.42741	-2.24481	-2.57327	5.6164	-1.67687	-2.1695	5.7835	-1.10548	-1.73386	5.86692	-0.540705	-1.26381	5.88	0.00390312	-0.791118	5.88	0.54592	-0.313631	5.86329	1.08377	0.16423	5.82202	1.61984	0.646	5.71223	2.14255	1.12843
Notochelys_platynota	8.88	5.91	-4.75	-11.4	-5.25	8.15	-8.14	-7.05	3.98	8.55	0.674	-7.14	8.74	6.07	-4.61	8.01752	6.24921	-3.93673	7.28343	6.30627	-3.27268	6.56192	6.4672	-2.59121	5.88849	6.68403	-1.87715	5.17225	6.65494	-1.17978	4.41677	6.40862	-0.5686	3.63673	6.12735	-0.001489	2.8633	5.97666	0.621363	2.09888	5.77086	1.23198	1.30091	5.48364	1.76363	0.511195	5.21457	2.32213	-0.233442
Cyclemys_dentata	-4.79	0.512	6.23	3.49	4.75	-8.72	2.36	2.95	-7.31	-4.85	-1.62	5.54	-4.74	0.632	6.16	-4.46477	1.0717	5.72892	-4.20209	1.60558	5.39954	-3.92115	2.13712	5.08115	-3.63319	2.69363	4.80319	-3.33427	3.2436	4.5273	-3.02119	3.70409	4.12767	-2.7484	4.1074	3.6468	-2.47573	4.48427	3.14532	-2.15713	4.84287	2.65549	-1.83635	5.16598	2.1457	-1.52058	5.47363	1.62376	-1.20461
Batagur_dhongoka	1.19	5.44	-9.08	-0.814	-0.838	8.63	-0.269	-3.39	4.42	1.34	2.45	-10.4	1.18	5.52	-8.88	1.12776	5.73672	-8.2476	1.06577	5.92058	-7.60558	1.0134	6.06101	-6.95222	0.950698	6.1673	-6.29333	0.888757	6.22924	-5.62832	0.826682	6.25	-4.96116	0.761958	6.22453	-4.2941	0.69595	6.16493	-3.6295	0.62903	6.06187	-2.9703	0.562224	5.93092	-2.31605	0.496064	5.76108	-1.67064	0.431152
Vijayachelys_silvatica	-2.96	3.43	-1.29	5.47	-3.29	3	3.72	-3.25	1.34	-2.96	1.29	-2.93	-2.86	3.41	-1.19	-2.56695	3.37917	-0.889481	-2.25821	3.30964	-0.604279	-1.95473	3.23904	-0.313355	-1.64786	3.16337	-0.028912	-1.33606	3.05831	0.241437	-1.02181	2.92105	0.494017	-0.703955	2.75407	0.722894	-0.380371	2.57659	0.935582	-0.0595161	2.38238	1.13762	0.259746	2.17773	1.33227	0.579462	1.96556	1.51755	0.893644
Melanochelys_trijuga	-1.71	7.04	-4.21	1.89	-4.57	7.34	1.64	-5.27	4.8	-1.55	4.84	-5.6	-1.7	7.06	-4.16	-1.57005	6.85008	-3.57014	-1.48766	6.81234	-2.93897	-1.41276	6.81	-2.29758	-1.32679	6.8	-1.65794	-1.24184	6.78	-1.01842	-1.13758	6.71758	-0.385925	-1.01498	6.48796	0.198663	-0.87309	6.16915	0.741956	-0.725559	5.84844	1.28311	-0.586003	5.50779	1.81369	-0.4459	5.16131	2.34115	-0.314634
Caretta_caretta	-16.1	4.88	-96.1	17.7	-17	-87.3	11.3	-17.7	-96.3	-14.9	-3.05	-106	-15.9	4.97	-95.7	-15.1948	5.35157	-94.3896	-14.216	5.3424	-93.216	-13.1083	5.15625	-92.1542	-12.0124	4.96686	-91.1562	-10.7978	4.48865	-90.6	-9.47165	3.88482	-90.264	-8.16395	3.31915	-89.7435	-7.0001	2.5574	-89.1067	-5.80211	1.79105	-88.5789	-4.54032	1.24016	-87.8668	-3.4202	0.286964	-87.7451	-2.21771
Dogania_subplana	4.27	1.51	1.27	-13.2	0.0365	0.154	-8.26	-0.32	-0.19	5.25	-0.226	-0.702	4	1.57	1.33	3.44686	1.80294	1.55294	2.92009	2.06413	1.80954	2.37563	2.30175	2.05175	1.77558	2.45349	2.21349	1.14327	2.52	2.29348	0.502509	2.53	2.32699	-0.138645	2.52	2.35424	-0.779292	2.50006	2.37997	-1.42074	2.48	2.38563	-2.06217	2.46831	2.4	-2.70346	2.44	2.4	-3.34479
Heosemys_spinosa	-2.63	-2.97	6.95	3.25	4.86	-6.86	2.96	5.88	-4.94	-2.59	-0.938	8.25	-2.62	-2.94	6.89	-2.49021	-2.78	6.27144	-2.36583	-2.89625	5.64124	-2.24785	-3.12429	5.02927	-2.11846	-3.33231	4.41308	-1.98682	-3.53318	3.7941	-1.82376	-3.62312	3.1588	-1.62868	-3.58066	2.53338	-1.46779	-3.58	1.89115	-1.28879	-3.4944	1.26077	-1.08225	-3.39613	0.638504	-0.861006	-3.2469	0.0332131	-0.634631
Chelus_fimbriata	-1.49	7.49	-5.91	1.16	-5.15	9.38	0.746	-5.06	6.02	-1.66	3.19	-9.53	-1.47	7.49	-5.81	-1.45	7.15649	-5.11639	-1.3295	6.60799	-4.58648	-1.25005	6.27016	-3.89027	-1.13339	5.93016	-3.19863	-1.01765	5.58592	-2.50888	-0.934733	5.21183	-1.86199	-0.849374	5.00312	-1.12843	-0.746051	4.63448	-0.457374	-0.608232	4.33353	0.245424	-0.439	3.90144	0.81109	-0.458294	3.88043	1.54706	-0.358835
Macrochelys_temminckii	-2.83	-7.61	-69.4	38.6	6.55	-93	27.2	12.7	-85.2	-2.63	9.22	-67.5	-2.5	-7.79	-69.7	-1.03658	-8.33477	-70.7465	0.414772	-8.93604	-71.7868	1.85224	-9.50667	-72.8611	3.43679	-9.41122	-73.7985	4.96988	-9.25	-74.6999	6.57361	-9.45498	-75.6374	8.14639	-9.53	-76.647	9.68502	-9.51	-77.7146	11.2166	-9.2142	-78.7	12.7234	-8.73312	-79.4078	14.2235	-8.64	-80.5078	15.7931
Malacochersus_tornieri	5.38	1.9	0.627	-6.96	-0.279	0.394	-5.86	-0.313	0.349	5.93	0.478	-0.58	5.26	1.91	0.65	4.81143	1.95805	0.726713	4.3727	2.02122	0.817141	3.92122	2.04	0.885288	3.4752	2.08451	0.974863	3.03577	2.14038	1.08077	2.58291	2.14026	1.13974	2.12971	2.09634	1.17366	1.67647	2.04241	1.19759	1.22338	1.99206	1.22	0.770178	1.92608	1.22	0.31554	1.88001	1.24	-0.138959
Malayemys_subtrijuga	4	-1.52	2.57	-4.83	1.36	-2.84	-3.78	-0.261	-3.13	3.46	-3.43	0.708	3.92	-1.47	2.57	3.59378	-1.21984	2.52394	3.28136	-0.955642	2.44896	2.99315	-0.659933	2.41	2.72547	-0.340249	2.39616	2.45497	-0.0238802	2.36437	2.16759	0.274167	2.31552	1.85811	0.54024	2.2327	1.53078	0.761191	2.10605	1.20098	0.982617	1.98133	0.865398	1.20684	1.87544	0.52604	1.40009	1.73239	0.190904
Indotestudo_elongata	-11.4	-1.15	11	10.3	0.0187	-9.76	6.19	-1.29	-6.18	-10.6	-4.83	8.21	-11.3	-0.969	11	-10.7282	0.0969468	10.6282	-9.80287	0.75117	9.96116	-8.85532	1.39168	9.30199	-7.99073	2.26688	8.80116	-7.17048	3.24661	8.44468	-6.26881	4.06925	7.97709	-5.32685	4.82169	7.42269	-4.43674	5.67105	6.91856	-3.46102	6.25686	6.24208	-2.44249	6.59643	5.46071	-1.44855	6.97023	4.66465	-0.471326
Pangshura_tentoria	5.03	5.35	-5.78	-6.81	-2.14	10.9	-5.63	-3.78	8.05	5.46	2.2	-7.56	5.01	5.45	-5.68	4.59719	5.59188	-4.98484	4.21454	5.79312	-4.27908	3.85584	6.02011	-3.56169	3.51741	6.30259	-2.85482	3.13466	6.5312	-2.1564	2.68243	6.56	-1.46037	2.2552	6.65827	-0.759518	1.82814	6.80465	-0.0599593	1.40217	6.80554	0.652976	0.991373	6.56767	1.32516	0.585686	6.55	2.05144	0.164729
Morenia_petersi	-2.29	5.98	-3.49	3.83	-4.18	6.99	3.32	-4.28	4.83	-2.16	3.22	-4.49	-2.26	5.95	-3.41	-2.04969	5.66969	-2.91446	-1.79161	5.48232	-2.4009	-1.50529	5.43306	-1.86752	-1.26197	5.39479	-1.31112	-1.03958	5.33792	-0.746526	-0.816709	5.28136	-0.182186	-0.560593	5.15895	0.356918	-0.299307	5.00622	0.885708	-0.0461921	4.88072	1.42427	0.215627	4.69096	1.94035	0.478781	4.47768	2.44618	0.727551
Geoemyda_spengleri	-3.93	2.9	-0.101	4.19	0.558	1.5	3.4	-0.423	0.865	-4.17	0.994	-0.831	-3.85	2.95	-0.0648	-3.56387	3.0071	0.045551	-3.27878	3.06921	0.156051	-2.9946	3.14885	0.270046	-2.70339	3.20665	0.379644	-2.40861	3.24767	0.487022	-2.10395	3.24	0.571101	-1.80365	3.19	0.642643	-1.50903	3.23	0.742292	-1.20554	3.24069	0.822753	-0.895836	3.23	0.885968	-0.586516	3.20247	0.946047	-0.284975
Manouria_impressa	12.2	2.63	1.89	-13.5	-0.669	-1.16	-9.85	-3.55	-1.98	13.1	-2.95	-0.263	12.2	2.66	1.9	11.2104	2.80688	1.83	10.3088	3.17472	1.88912	9.40803	3.60198	1.998	8.64832	4.22807	2.18723	7.85903	4.80488	2.40122	6.88138	4.91	2.42696	5.88571	5.05486	2.44	4.89946	5.26123	2.47	3.90087	5.37324	2.41676	2.89692	5.44846	2.41	1.8939	5.54	2.41744	0.892146
Platemys_platycephala	-2.75	5.05	-3.16	6.73	-3.91	4.58	5.56	-3.76	2.91	-2.88	3.39	-4.27	-2.71	5.01	-3.1	-2.39564	4.80673	-2.70454	-2.06395	4.56263	-2.34772	-1.73183	4.37304	-1.95759	-1.39847	4.21282	-1.55608	-1.05666	4.06846	-1.15577	-0.713192	3.89817	-0.767642	-0.354329	3.68109	-0.426221	-2.27216e-05	3.39526	-0.126595	0.353276	3.12299	0.187158	0.694404	2.85286	0.515047	1.01043	2.61366	0.888965	1.32279
Trachemys_scripta	3.38	5.52	-8.67	-1.72	-2.4	9.59	-1.55	-4.1	6.65	3.15	1.88	-10.1	3.36	5.59	-8.57	3.23833	5.86167	-7.87334	3.08896	5.89827	-7.1362	2.91282	5.93239	-6.41367	2.70559	5.9548	-5.68234	2.50785	5.98	-4.948	2.31118	5.98	-4.21355	2.10961	5.9468	-3.48204	1.89848	5.88899	-2.75493	1.69073	5.77024	-2.03294	1.51931	5.62908	-1.30724	1.33683	5.49683	-0.584295	1.09808
Glyptemys_insculpta	-7.79	3.57	-1.88	9.04	-0.872	1.58	7.01	-1.97	0.425	-8.19	1	-3.38	-7.73	3.63	-1.81	-7.12837	3.76	-1.52577	-6.4948	3.7539	-1.2861	-6.03966	4.07517	-0.90056	-5.46765	4.27309	-0.580671	-4.8704	4.4243	-0.28063	-4.25005	4.52058	-0.00659587	-3.6189	4.62	0.237331	-2.9658	4.51477	0.3636	-2.29716	4.47	0.50833	-1.63075	4.43	0.661604	-0.977283	4.40301	0.864472	-0.331034
Chrysemys_picta	1.93	-2.04	6.06	-1.44	5.28	-4.27	-1.64	3.75	-4.51	1.84	-4.24	4.81	1.91	-1.95	6	1.82162	-1.53207	5.76603	1.72473	-1.10911	5.54456	1.63393	-0.667618	5.36785	1.54863	-0.222888	5.18726	1.45555	0.213185	4.99109	1.34939	0.633233	4.76817	1.24169	1.03444	4.51393	1.12493	1.41521	4.23315	1.00598	1.77755	3.92995	0.888998	2.14474	3.63105	0.769974	2.48691	3.30571	0.649214
Proganochelys_quenstedti	-22	7.79	20.5	27.5	23.3	-0.383	26.4	7.99	-12.7	-24	-8.39	9.88	-20.8	8.4	20.5	-19.2225	9.16263	19.8	-17.5424	9.9478	19.3475	-15.7742	10.5086	18.8914	-14.0836	11.211	18.5	-12.3542	11.9153	18.0847	-10.647	12.651	17.549	-8.92926	13.2	16.951	-7.24444	13.4	16.0254	-5.60064	13.6367	15.0633	-3.83364	14.2242	14.5758	-2.03484	14.5659	13.9683	-0.235477
Proterochersis_robusta	-1.83	9.43	-72.5	-1.12	6.69	-36.3	-0.968	-2.59	-40.3	-1.36	0.813	-72.4	-1.84	9.59	-72.2	-1.83261	10.1322	-70.9521	-1.78848	11.3303	-70.1545	-1.75	12.2615	-69.0385	-1.65361	12.9639	-67.8361	-1.56869	13.5566	-66.5303	-1.47772	14.0456	-65.2544	-1.44	14.8678	-64.0643	-1.41	15.5532	-62.7937	-1.38	16.1347	-61.496	-1.37	16.3	-60.0692	-1.34872	16.1064	-58.6743	-1.27551
Plesiochelys_bigleri	171	21.4	-21.5	-257	-12.9	24.9	-198	-32.3	-22.2	160	-11	-91.6	169	22.7	-19	155.546	25.9725	-11.8096	141.545	28.3455	-5.38431	127.926	30.9507	1.58581	114.304	32.9101	8.53098	100.948	34.6282	16.0335	86.7448	35.6452	22.4421	72.1493	36.6697	27.8574	56.8516	36.8845	30.9619	41.3953	36.0663	33.0009	28.2895	34.3553	33.6722	14.211	33.6194	38.1824	-0.819639
[truncated: 143 more columns]

## Sheet: RAW
Dermatemys_mawi
	landmark	lm_name	curve_nb	semilandmark_nb	X	Y	Z	NX	NY	NZ
1	1	nuchal	NA	NA	-0.353	-2.16	11.4	-0.00255	0.022	0.0975
2	2	pygal	NA	NA	-0.478	3.16	-12.3	0.00184	0.0516	-0.0856
3	3	xiphiplastron	NA	NA	-0.581	0.367	-8.6	0.00462	-0.0733	-0.0679
4	4	epiplastron	NA	NA	-0.212	-5.78	9.69	-0.00247	-0.0659	0.0752
5	5	R_hypoplastron	NA	NA	-6	0.381	-5.74	0.0677	-0.0539	-0.0502
6	6	R_hyoplastron	NA	NA	-5.19	-2.62	6.42	0.0728	-0.0589	0.0351
7	7	L_hypoplastron	NA	NA	5.28	-0.0342	-5.82	-0.0712	-0.0657	-0.0248
8	8	L_hyoplastron	NA	NA	5.46	-3.33	6.11	-0.0459	-0.0817	0.0349
9	9	R_middle_plastron	NA	NA	-7.36	-2.75	-0.0311	-0.0467	-0.0883	-0.00428
10	10	L_middle_plastron	NA	NA	6.76	-3.06	-0.0666	0.067	-0.0662	-0.0336
11	11	R_marginals	11	2	-0.601	3.17	-12.3	0.0488	0.0301	-0.0819
12	12	R_marginals	11	3	-0.713	3.2	-12.4	0.0267	0.0312	-0.0912
13	13	R_marginals	11	4	-0.843	3.2	-12.4	-0.00616	0.0363	-0.093
14	14	R_marginals	11	5	-0.973	3.18	-12.4	-0.0113	0.014	-0.0984
15	15	R_marginals	11	6	-1.1	3.15	-12.4	-0.0168	0.0283	-0.0944
16	16	R_marginals	11	7	-1.23	3.13	-12.3	-0.017	0.035	-0.0921
17	17	R_marginals	11	8	-1.36	3.12	-12.3	0.00512	0.0227	-0.0973
18	18	R_marginals	11	9	-1.49	3.13	-12.3	0.0194	0.06	-0.0776
19	19	R_marginals	11	10	-1.62	3.14	-12.3	-0.00672	0.0883	-0.0465
20	20	R_marginals	11	11	-1.74	3.12	-12.3	-0.0238	0.0932	-0.0272
21	21	R_marginals	11	12	-1.87	3.11	-12.3	-0.00807	0.0823	-0.0562
22	22	R_marginals	11	13	-2	3.11	-12.3	-0.00964	0.0896	-0.0433
23	23	R_marginals	11	14	-2.14	3.09	-12.2	-0.0302	0.0839	-0.0453
24	24	R_marginals	11	15	-2.29	3.08	-12.2	-0.0217	0.0911	-0.0351
25	25	R_marginals	11	16	-2.43	3.06	-12.2	-0.0185	0.0855	-0.0484
26	26	R_marginals	11	17	-2.57	3.04	-12.1	-0.016	0.0909	-0.0384
27	27	R_marginals	11	18	-2.7	3.02	-12.1	-0.0384	0.0822	-0.0421
28	28	R_marginals	11	19	-2.84	3	-12	-0.0119	0.0912	-0.0392
29	29	R_marginals	11	20	-2.98	3	-12	-0.0274	0.0871	-0.0409
30	30	R_marginals	11	21	-3.12	2.99	-11.9	-0.021	0.0949	-0.0237
31	31	R_marginals	11	22	-3.26	2.99	-11.9	-0.0159	0.0939	-0.0303
32	32	R_marginals	11	23	-3.4	2.98	-11.8	-0.0218	0.095	-0.0223
33	33	R_marginals	11	24	-3.53	2.98	-11.7	0.0231	0.0892	-0.0389
34	34	R_marginals	11	25	-3.67	3	-11.7	-0.00703	0.0992	0.0101
35	35	R_marginals	11	26	-3.76	2.99	-11.6	-0.0163	0.0983	0.00847
36	36	R_marginals	11	27	-3.85	2.97	-11.6	-0.00702	0.0993	0.00965
37	37	R_marginals	11	28	-3.93	2.96	-11.6	-0.0157	0.0987	0.00352
38	38	R_marginals	11	29	-4.02	2.95	-11.5	-0.0102	0.0994	0.00337
39	39	R_marginals	11	30	-4.11	2.93	-11.5	-0.00905	0.0992	0.00859
40	40	R_marginals	11	31	-4.19	2.92	-11.4	-0.015	0.0979	0.0139
41	41	R_marginals	11	32	-4.28	2.91	-11.4	-0.00594	0.0981	0.0184
42	42	R_marginals	11	33	-4.36	2.89	-11.4	-0.0188	0.0955	0.023
43	43	R_marginals	11	34	-4.45	2.88	-11.3	-0.0197	0.0975	0.0101
44	44	R_marginals	11	35	-4.53	2.86	-11.3	-0.018	0.0983	0.00221
45	45	R_marginals	11	36	-4.62	2.84	-11.2	-0.0218	0.0972	-0.00862
46	46	R_marginals	11	37	-4.7	2.81	-11.2	-0.0388	0.0913	-0.0126
47	47	R_marginals	11	38	-4.83	2.77	-11.1	-0.0414	0.0908	0.00681
48	48	R_marginals	11	39	-4.97	2.71	-11	-0.0488	0.0838	-0.0246
49	49	R_marginals	11	40	-5.1	2.67	-10.9	-0.0278	0.0949	-0.0148
50	50	R_marginals	11	41	-5.23	2.61	-10.8	-0.0575	0.0794	0.02
51	51	R_marginals	11	42	-5.32	2.74	-10.8	-0.0126	0.0951	0.0283
52	52	R_marginals	11	43	-5.46	2.7	-10.7	-0.0249	0.0964	0.00987
53	53	R_marginals	11	44	-5.59	2.67	-10.6	-0.0155	0.0939	0.0306
54	54	R_marginals	11	45	-5.72	2.6	-10.5	-0.00711	0.0564	0.0823
55	55	R_marginals	11	46	-5.85	2.52	-10.5	0.00351	0.095	0.031
56	56	R_marginals	11	47	-5.98	2.46	-10.4	0.00248	0.0918	0.0395
57	57	R_marginals	11	48	-6.11	2.43	-10.3	0.0333	0.0784	0.0523
58	58	R_marginals	11	49	-6.23	2.39	-10.2	0.0341	0.0743	0.0576
59	59	R_marginals	11	50	-6.39	2.31	-10.1	-0.0154	0.0973	0.017
60	60	R_marginals	11	51	-6.55	2.24	-9.91	-0.0289	0.095	0.0116
61	61	R_marginals	11	52	-6.71	2.17	-9.77	-0.0337	0.0899	0.0281
62	62	R_marginals	11	53	-6.86	2.1	-9.63	0.0238	0.0757	0.0609
63	63	R_marginals	11	54	-7.02	1.99	-9.51	0.0537	0.0795	0.028
64	64	R_marginals	11	55	-7.17	1.89	-9.37	-0.0453	0.0891	0.00415
65	65	R_marginals	11	56	-7.31	1.79	-9.23	-0.0411	0.0896	0.0168
66	66	R_marginals	11	57	-7.45	1.72	-9.07	-0.02	0.0956	0.0214
67	67	R_marginals	11	58	-7.59	1.7	-8.89	-0.0107	0.0903	0.0416
68	68	R_marginals	11	59	-7.72	1.57	-8.75	-0.0341	0.0938	0.00636
69	69	R_marginals	11	60	-7.86	1.53	-8.58	-0.0252	0.0958	0.0134
70	70	R_marginals	11	61	-7.99	1.45	-8.42	-0.0305	0.0909	0.0283
71	71	R_marginals	11	62	-8.05	1.4	-8.34	-0.0398	0.0878	0.0267
72	72	R_marginals	11	63	-8.11	1.35	-8.25	-0.0377	0.0917	0.0128
73	73	R_marginals	11	64	-8.17	1.31	-8.16	-0.0522	0.0828	0.0205
74	74	R_marginals	11	65	-8.22	1.25	-8.07	-0.0457	0.0888	-0.00457
75	75	R_marginals	11	66	-8.27	1.21	-7.97	-0.0417	0.0865	0.0277
76	76	R_marginals	11	67	-8.32	1.16	-7.87	-0.0621	0.077	0.0143
77	77	R_marginals	11	68	-8.36	1.1	-7.78	-0.0423	0.0825	0.0374
78	78	R_marginals	11	69	-8.4	1.06	-7.68	-0.0332	0.0893	0.0304
79	79	R_marginals	11	70	-8.44	1.01	-7.58	-0.0531	0.0818	0.0221
80	80	R_marginals	11	71	-8.48	0.952	-7.48	-0.041	0.0848	0.0337
81	81	R_marginals	11	72	-8.52	0.896	-7.38	-0.0514	0.0783	0.0351
82	82	R_marginals	11	73	-8.55	0.845	-7.28	-0.0468	0.0848	0.0249
83	83	R_marginals	11	74	-8.6	0.769	-7.15	-0.052	0.0784	0.0338
84	84	R_marginals	11	75	-8.64	0.695	-7.02	-0.0415	0.0832	0.0368
85	85	R_marginals	11	76	-8.69	0.62	-6.88	-0.0377	0.0889	0.0261
86	86	R_marginals	11	77	-8.73	0.549	-6.75	-0.045	0.0833	0.0322
87	87	R_marginals	11	78	-8.78	0.49	-6.61	-0.0441	0.0867	0.0231
88	88	R_marginals	11	79	-8.82	0.429	-6.47	-0.0453	0.0885	0.0106
89	89	R_marginals	11	80	-8.87	0.374	-6.33	-0.05	0.0832	0.0241
90	90	R_marginals	11	81	-8.91	0.316	-6.18	-0.0599	0.0788	-0.0139
91	91	R_marginals	11	82	-8.98	0.28	-6.04	-0.0595	0.0799	0.00944
92	92	R_marginals	11	83	-9.02	0.222	-5.9	-0.0297	0.0868	0.0398
93	93	R_marginals	11	84	-9.06	0.166	-5.76	-0.0318	0.0912	0.026
94	94	R_marginals	11	85	-9.1	0.113	-5.61	-0.088	0.0461	0.011
95	95	R_marginals	11	86	-9.13	0.0664	-5.49	-0.0909	0.0406	0.0093
96	96	R_marginals	11	87	-9.14	0.0132	-5.37	-0.0977	0.0179	-0.0115
97	97	R_marginals	11	88	-9.15	-0.0381	-5.25	-0.0904	-0.0308	-0.0296
98	98	R_marginals	11	89	-9.16	-0.0881	-5.12	-0.0929	-0.0266	-0.0257
99	99	R_marginals	11	90	-9.17	-0.14	-5	-0.0906	-0.0323	-0.0275
100	100	R_marginals	11	91	-9.19	-0.185	-4.88	-0.0982	-0.0137	-0.0133
101	101	R_marginals	11	92	-9.19	-0.233	-4.75	-0.0962	-0.0153	-0.0226
102	102	R_marginals	11	93	-9.19	-0.281	-4.63	-0.0924	-0.0319	-0.0212
103	103	R_marginals	11	94	-9.2	-0.325	-4.51	-0.0998	0.00373	-0.00452
104	104	R_marginals	11	95	-9.21	-0.369	-4.38	-0.0949	-0.0266	0.0168
105	105	R_marginals	11	96	-9.19	-0.414	-4.26	-0.0984	0.0125	0.0126
106	106	R_marginals	11	97	-9.19	-0.455	-4.13	-0.0995	0.00982	0.00254
107	107	R_marginals	11	98	-9.2	-0.503	-3.97	-0.082	0.0566	0.0086
108	108	R_marginals	11	99	-9.19	-0.548	-3.81	-0.089	0.037	0.0267
109	109	R_marginals	11	100	-9.17	-0.593	-3.66	-0.0818	0.0543	0.0191
110	110	R_marginals	11	101	-9.15	-0.635	-3.5	-0.0963	0.016	0.0217
111	111	R_marginals	11	102	-9.16	-0.675	-3.34	-0.0957	0.029	0.00234
112	112	R_marginals	11	103	-9.13	-0.716	-3.18	-0.0944	0.0263	0.0201
113	113	R_marginals	11	104	-9.13	-0.754	-3.02	-0.0998	-0.00359	0.00433
114	114	R_marginals	11	105	-9.1	-0.795	-2.86	-0.0952	0.0214	0.0218
115	115	R_marginals	11	106	-9.09	-0.835	-2.7	-0.0992	0.0129	-0.000567
116	116	R_marginals	11	107	-9.08	-0.875	-2.54	-0.0966	0.0193	0.017
117	117	R_marginals	11	108	-9.08	-0.917	-2.38	-0.0981	0.0161	0.0107
118	118	R_marginals	11	109	-9.07	-0.961	-2.22	-0.0973	0.0128	0.0189
119	119	R_marginals	11	110	-9.06	-0.996	-2.11	-0.0961	0.0263	0.00814
120	120	R_marginals	11	111	-9.05	-1.03	-2	-0.0973	0.0157	0.0171
121	121	R_marginals	11	112	-9.04	-1.07	-1.88	-0.0982	0.0153	0.0114
122	122	R_marginals	11	113	-9.04	-1.11	-1.77	-0.0926	0.0291	0.024
123	123	R_marginals	11	114	-9.03	-1.14	-1.66	-0.0985	0.0171	0.00356
124	124	R_marginals	11	115	-9.03	-1.18	-1.54	-0.0954	0.0282	0.0106
125	125	R_marginals	11	116	-9.03	-1.22	-1.43	-0.0972	0.00591	0.0227
126	126	R_marginals	11	117	-9.02	-1.26	-1.31	-0.0994	0.0107	0.00329
127	127	R_marginals	11	118	-9.01	-1.29	-1.2	-0.0995	0.00903	0.0034
128	128	R_marginals	11	119	-9.01	-1.33	-1.09	-0.0998	0.00618	0.00222
129	129	R_marginals	11	120	-9.02	-1.36	-0.971	-0.0989	0.0129	-0.00728
130	130	R_marginals	11	121	-9.01	-1.39	-0.856	-0.0993	0.00848	0.00786
131	131	R_marginals	11	122	-9.01	-1.43	-0.73	-0.0994	0.0098	-0.00472
132	132	R_marginals	11	123	-9	-1.46	-0.604	-0.0996	0.00387	0.00801
133	133	R_marginals	11	124	-8.99	-1.49	-0.478	-0.099	0.0114	0.0085
134	134	R_marginals	11	125	-8.98	-1.52	-0.352	-0.1	-0.00113	0.0009
135	135	R_marginals	11	126	-8.97	-1.55	-0.226	-0.0993	-0.00389	0.0113
136	136	R_marginals	11	127	-8.95	-1.58	-0.1	-0.0996	-0.00665	0.00533
137	137	R_marginals	11	128	-8.95	-1.61	0.0269	-0.0999	0.0025	0.003
138	138	R_marginals	11	129	-8.95	-1.64	0.154	-0.0991	-0.0131	0.00212
139	139	R_marginals	11	130	-8.93	-1.66	0.281	-0.0991	-0.00294	0.013
140	140	R_marginals	11	131	-8.91	-1.69	0.407	-0.0982	0.00291	0.0187
141	141	R_marginals	11	132	-8.9	-1.71	0.534	-0.0996	-0.00374	0.00785
142	142	R_marginals	11	133	-8.87	-1.74	0.661	-0.0998	-0.00258	0.00544
143	143	R_marginals	11	134	-8.85	-1.76	0.79	-0.0988	-0.00896	0.0124
144	144	R_marginals	11	135	-8.83	-1.78	0.921	-0.096	-0.0157	0.0231
145	145	R_marginals	11	136	-8.81	-1.8	1.05	-0.0998	0.00171	0.0055
146	146	R_marginals	11	137	-8.78	-1.82	1.18	-0.0984	0.00107	0.0178
147	147	R_marginals	11	138	-8.77	-1.83	1.31	-0.0996	0.00597	0.00677
148	148	R_marginals	11	139	-8.76	-1.85	1.45	-0.0984	0.0118	0.0133
149	149	R_marginals	11	140	-8.74	-1.86	1.58	-0.0983	0.0104	0.015
150	150	R_marginals	11	141	-8.72	-1.88	1.71	-0.0991	0.00636	0.0115
151	151	R_marginals	11	142	-8.7	-1.89	1.84	-0.0963	0.00452	0.0267
152	152	R_marginals	11	143	-8.67	-1.91	1.97	-0.0973	0.0108	0.0206
153	153	R_marginals	11	144	-8.65	-1.92	2.1	-0.0954	0.00983	0.0285
154	154	R_marginals	11	145	-8.62	-1.94	2.23	-0.0965	0.0112	0.0238
155	155	R_marginals	11	146	-8.59	-1.95	2.36	-0.0983	0.00163	0.0183
156	156	R_marginals	11	147	-8.56	-1.97	2.48	-0.0963	0.00908	0.0255
157	157	R_marginals	11	148	-8.52	-1.99	2.6	-0.0903	-0.0141	0.0406
158	158	R_marginals	11	149	-8.47	-2	2.71	-0.0936	-0.00569	0.0348
159	159	R_marginals	11	150	-8.43	-2.02	2.83	-0.0986	-0.0122	0.0111
160	160	R_marginals	11	151	-8.4	-2.04	2.95	-0.0929	-0.0125	0.0348
161	161	R_marginals	11	152	-8.34	-2.05	3.07	-0.0861	-0.0184	0.0474
162	162	R_marginals	11	153	-8.29	-2.07	3.18	-0.0869	-0.00833	0.0488
163	163	R_marginals	11	154	-8.25	-2.08	3.3	-0.0921	-0.0159	0.0355
164	164	R_marginals	11	155	-8.21	-2.1	3.42	-0.0957	-0.011	0.027
165	165	R_marginals	11	156	-8.17	-2.11	3.54	-0.0923	-0.0182	0.0339
166	166	R_marginals	11	157	-8.14	-2.12	3.66	-0.0941	-0.0201	0.0273
167	167	R_marginals	11	158	-8.09	-2.13	3.84	-0.0945	-0.013	0.0301
168	168	R_marginals	11	159	-8.04	-2.14	4.01	-0.0954	-0.0213	0.021
169	169	R_marginals	11	160	-8	-2.14	4.19	-0.0979	-0.0104	0.0175
170	170	R_marginals	11	161	-7.96	-2.15	4.37	-0.0939	-0.0254	0.0232
171	171	R_marginals	11	162	-7.92	-2.15	4.54	-0.0974	-0.00724	0.0214
172	172	R_marginals	11	163	-7.88	-2.15	4.72	-0.0976	-0.00455	0.0215
173	173	R_marginals	11	164	-7.84	-2.15	4.9	-0.0968	0.00636	0.0243
174	174	R_marginals	11	165	-7.79	-2.16	5.07	-0.0955	0.00394	0.0293
175	175	R_marginals	11	166	-7.74	-2.16	5.25	-0.0908	0.0158	0.0388
176	176	R_marginals	11	167	-7.68	-2.17	5.42	-0.0931	0.0153	0.0331
177	177	R_marginals	11	168	-7.64	-2.19	5.6	-0.0922	0.0135	0.0364
178	178	R_marginals	11	169	-7.59	-2.2	5.77	-0.0904	0.0244	0.0351
179	179	R_marginals	11	170	-7.54	-2.22	5.9	-0.0905	0.0237	0.0354
180	180	R_marginals	11	171	-7.49	-2.25	6.03	-0.0825	0.032	0.0466
181	181	R_marginals	11	172	-7.44	-2.27	6.15	-0.0861	0.0259	0.0438
182	182	R_marginals	11	173	-7.38	-2.3	6.28	-0.0881	0.0246	0.0405
183	183	R_marginals	11	174	-7.32	-2.34	6.4	-0.0814	0.0257	0.0521
184	184	R_marginals	11	175	-7.26	-2.37	6.52	-0.0856	0.0182	0.0484
185	185	R_marginals	11	176	-7.2	-2.4	6.65	-0.0896	0.00233	0.0444
186	186	R_marginals	11	177	-7.14	-2.44	6.77	-0.0877	0.00883	0.0472
187	187	R_marginals	11	178	-7.09	-2.47	6.89	-0.0871	-0.00245	0.049
188	188	R_marginals	11	179	-7.03	-2.5	7.01	-0.0869	-0.00288	0.0494
189	189	R_marginals	11	180	-6.96	-2.53	7.13	-0.0871	-0.0115	0.0477
190	190	R_marginals	11	181	-6.89	-2.56	7.25	-0.0864	-0.0106	0.0493
191	191	R_marginals	11	182	-6.82	-2.59	7.37	-0.0773	-0.0168	0.0612
192	192	R_marginals	11	183	-6.74	-2.61	7.48	-0.0765	-0.013	0.0631
193	193	R_marginals	11	184	-6.66	-2.64	7.58	-0.0846	-0.0124	0.0519
194	194	R_marginals	11	185	-6.58	-2.66	7.7	-0.0856	-0.0107	0.0505
195	195	R_marginals	11	186	-6.5	-2.69	7.8	-0.0783	-0.0194	0.0591
196	196	R_marginals	11	187	-6.41	-2.71	7.91	-0.0789	-0.0143	0.0597
197	197	R_marginals	11	188	-6.34	-2.73	8.02	-0.078	-0.0174	0.0601
198	198	R_marginals	11	189	-6.27	-2.75	8.14	-0.0814	0.00486	0.0578
199	199	R_marginals	11	190	-6.19	-2.78	8.25	-0.076	-0.0078	0.0645
200	200	R_marginals	11	191	-6.1	-2.8	8.36	-0.0803	-0.0142	0.0579
201	201	R_marginals	11	192	-6.01	-2.81	8.46	-0.07	-0.00387	0.0713
202	202	R_marginals	11	193	-5.91	-2.83	8.56	-0.0788	0.00622	0.0612
203	203	R_marginals	11	194	-5.82	-2.85	8.65	-0.0744	0.00201	0.0668
204	204	R_marginals	11	195	-5.73	-2.86	8.75	-0.0719	0.00455	0.0694
205	205	R_marginals	11	196	-5.64	-2.88	8.85	-0.0714	0.00185	0.07
206	206	R_marginals	11	197	-5.54	-2.89	8.95	-0.0707	0.00833	0.0702
207	207	R_marginals	11	198	-5.45	-2.9	9.04	-0.0734	0.0194	0.0651
208	208	R_marginals	11	199	-5.35	-2.92	9.14	-0.0665	0.00936	0.0741
209	209	R_marginals	11	200	-5.26	-2.93	9.24	-0.0685	0.0149	0.0713
210	210	R_marginals	11	201	-5.16	-2.94	9.33	-0.0644	0.0209	0.0736
211	211	R_marginals	11	202	-5.06	-2.95	9.42	-0.0632	0.015	0.076
212	212	R_marginals	11	203	-4.96	-2.96	9.51	-0.0617	0.0135	0.0775
213	213	R_marginals	11	204	-4.86	-2.97	9.6	-0.0684	0.00894	0.0724
214	214	R_marginals	11	205	-4.76	-2.98	9.69	-0.0654	0.00362	0.0755
215	215	R_marginals	11	206	-4.65	-2.99	9.78	-0.0655	0.0169	0.0737
216	216	R_marginals	11	207	-4.56	-3	9.88	-0.0628	0.012	0.0769
217	217	R_marginals	11	208	-4.45	-3.02	9.96	-0.0578	0.0105	0.0809
218	218	R_marginals	11	209	-4.34	-3.04	10	-0.0609	0.0118	0.0785
219	219	R_marginals	11	210	-4.23	-3.06	10.1	-0.0628	0.0113	0.077
220	220	R_marginals	11	211	-4.12	-3.07	10.2	-0.0548	-0.00816	0.0833
221	221	R_marginals	11	212	-4.01	-3.09	10.3	-0.0574	-0.0114	0.0811
222	222	R_marginals	11	213	-3.89	-3.1	10.4	-0.0394	-0.0241	0.0887
223	223	R_marginals	11	214	-3.77	-3.1	10.4	-0.0333	-0.0123	0.0935
224	224	R_marginals	11	215	-3.64	-3.1	10.5	-0.036	-0.00611	0.0931
225	225	R_marginals	11	216	-3.51	-3.1	10.5	-0.0356	-0.0264	0.0896
226	226	R_marginals	11	217	-3.39	-3.08	10.6	-0.0541	-0.0166	0.0824
227	227	R_marginals	11	218	-3.27	-3.07	10.6	-0.0234	-0.0367	0.09
228	228	R_marginals	11	219	-3.16	-3.04	10.7	-0.0256	-0.035	0.0901
229	229	R_marginals	11	220	-3.04	-3.01	10.7	-0.0422	-0.00274	0.0906
230	230	R_marginals	11	221	-2.93	-2.98	10.8	-0.0375	-0.0279	0.0884
231	231	R_marginals	11	222	-2.82	-2.94	10.8	-0.049	-0.0293	0.0821
232	232	R_marginals	11	223	-2.71	-2.9	10.9	-0.0301	0.00896	0.095
233	233	R_marginals	11	224	-2.6	-2.85	11	-0.0653	0.00546	0.0756
234	234	R_marginals	11	225	-2.49	-2.81	11	-0.0307	0.0415	0.0856
235	235	R_marginals	11	226	-2.38	-2.76	11	-0.0412	0.0424	0.0806
236	236	R_marginals	11	227	-2.25	-2.72	11.1	-0.0271	0.0536	0.0799
237	237	R_marginals	11	228	-2.13	-2.69	11.1	-0.0378	0.0468	0.0799
238	238	R_marginals	11	229	-2.01	-2.65	11.1	-0.034	0.0381	0.086
239	239	R_marginals	11	230	-1.87	-2.61	11.2	-0.0284	0.0317	0.0905
240	240	R_marginals	11	231	-1.73	-2.57	11.2	-0.0265	0.0245	0.0933
241	241	R_marginals	11	232	-1.6	-2.53	11.2	-0.02	0.0165	0.0966
242	242	R_marginals	11	233	-1.46	-2.49	11.2	-0.0276	0.0321	0.0906
243	243	R_marginals	11	234	-1.32	-2.45	11.3	-0.0247	0.0212	0.0946
244	244	R_marginals	11	235	-1.19	-2.4	11.3	-0.0339	0.00592	0.0939
245	245	R_marginals	11	236	-1.05	-2.36	11.3	-0.0201	0.0217	0.0955
246	246	R_marginals	11	237	-0.909	-2.32	11.3	-0.00602	-0.0177	0.0982
247	247	R_marginals	11	238	-0.766	-2.29	11.3	0.0337	-0.0586	0.0737
248	248	R_marginals	11	239	-0.629	-2.24	11.4	-0.0286	-0.00947	0.0953
249	249	R_marginals	11	240	-0.493	-2.2	11.4	0.00544	-0.0522	0.0851
250	250	Vertebrals	12	2	-0.334	-1.92	11.3	-0.00904	0.0555	0.0827
251	251	Vertebrals	12	3	-0.316	-1.71	11.1	-0.00971	0.0583	0.0807
252	252	Vertebrals	12	4	-0.298	-1.49	11	-0.0069	0.0659	0.0749
253	253	Vertebrals	12	5	-0.281	-1.28	10.8	0.00158	0.0547	0.0837
254	254	Vertebrals	12	6	-0.264	-1.06	10.7	0.0034	0.0535	0.0844
255	255	Vertebrals	12	7	-0.247	-0.834	10.6	-0.00479	0.0499	0.0865
256	256	Vertebrals	12	8	-0.23	-0.609	10.4	-0.0044	0.0532	0.0846
257	257	Vertebrals	12	9	-0.214	-0.389	10.3	0.00216	0.0572	0.082
258	258	Vertebrals	12	10	-0.199	-0.171	10.1	-0.00669	0.0615	0.0786
259	259	Vertebrals	12	11	-0.184	0.0429	9.99	-0.00273	0.0565	0.0825
260	260	Vertebrals	12	12	-0.171	0.251	9.83	0.00311	0.0609	0.0793
261	261	Vertebrals	12	13	-0.158	0.456	9.66	0.000297	0.0648	0.0762
262	262	Vertebrals	12	14	-0.147	0.649	9.49	0.0115	0.0671	0.0733
263	263	Vertebrals	12	15	-0.138	0.832	9.3	0.00507	0.0612	0.0789
264	264	Vertebrals	12	16	-0.131	0.978	9.19	-0.00368	0.0716	0.0697
265	265	Vertebrals	12	17	-0.127	1.1	9.05	0.00675	0.0758	0.0648
266	266	Vertebrals	12	18	-0.124	1.22	8.92	0.00583	0.0769	0.0636
267	267	Vertebrals	12	19	-0.122	1.33	8.77	-0.000312	0.0785	0.0619
268	268	Vertebrals	12	20	-0.122	1.45	8.63	0.00339	0.081	0.0585
269	269	Vertebrals	12	21	-0.122	1.55	8.48	0.00572	0.0787	0.0614
270	270	Vertebrals	12	22	-0.122	1.66	8.33	0.00367	0.0828	0.056
271	271	Vertebrals	12	23	-0.123	1.75	8.18	-0.00017	0.0726	0.0687
272	272	Vertebrals	12	24	-0.124	1.86	8.03	-0.00529	0.0856	0.0514
273	273	Vertebrals	12	25	-0.125	1.96	7.87	-0.00191	0.0862	0.0507
274	274	Vertebrals	12	26	-0.125	2.05	7.72	0.00405	0.0842	0.0538
275	275	Vertebrals	12	27	-0.125	2.15	7.56	0.00243	0.0841	0.0541
276	276	Vertebrals	12	28	-0.124	2.24	7.4	-0.00181	0.0829	0.0558
277	277	Vertebrals	12	29	-0.122	2.34	7.25	-0.00372	0.0835	0.0549
278	278	Vertebrals	12	30	-0.12	2.42	7.12	0.00235	0.0905	0.0424
279	279	Vertebrals	12	31	-0.117	2.49	6.98	0.000246	0.0879	0.0476
280	280	Vertebrals	12	32	-0.113	2.57	6.85	0.00754	0.0877	0.0475
281	281	Vertebrals	12	33	-0.109	2.65	6.71	0.00347	0.0843	0.0537
282	282	Vertebrals	12	34	-0.105	2.73	6.58	0.0102	0.0877	0.047
283	283	Vertebrals	12	35	-0.1	2.79	6.44	0.00626	0.0881	0.047
284	284	Vertebrals	12	36	-0.0957	2.86	6.3	0.00689	0.0907	0.0415
285	285	Vertebrals	12	37	-0.0915	2.93	6.16	0.00845	0.0893	0.0443
286	286	Vertebrals	12	38	-0.0875	3	6.02	0.00675	0.0896	0.0439
287	287	Vertebrals	12	39	-0.084	3.06	5.88	0.00944	0.0886	0.0455
288	288	Vertebrals	12	40	-0.0809	3.13	5.74	0.00638	0.091	0.0409
289	289	Vertebrals	12	41	-0.0785	3.2	5.6	0.00481	0.0882	0.0468
290	290	Vertebrals	12	42	-0.0768	3.27	5.46	0.00617	0.0911	0.0409
291	291	Vertebrals	12	43	-0.0763	3.32	5.32	0.00498	0.094	0.0339
292	292	Vertebrals	12	44	-0.0797	3.34	5.12	0.00732	0.0908	0.0412
293	293	Vertebrals	12	45	-0.0801	3.43	4.94	0.00367	0.0919	0.0393
294	294	Vertebrals	12	46	-0.0819	3.5	4.75	0.00551	0.0934	0.0353
295	295	Vertebrals	12	47	-0.0847	3.57	4.56	0.0101	0.0951	0.0291
296	296	Vertebrals	12	48	-0.0882	3.63	4.37	0.0087	0.0957	0.0275
297	297	Vertebrals	12	49	-0.092	3.7	4.18	0.00769	0.0937	0.0342
298	298	Vertebrals	12	50	-0.096	3.76	4	0.00467	0.096	0.0278
299	299	Vertebrals	12	51	-0.0995	3.83	3.81	0.00677	0.0926	0.0372
300	300	Vertebrals	12	52	-0.103	3.9	3.62	0.00921	0.0931	0.0354
301	301	Vertebrals	12	53	-0.107	3.98	3.44	0.00382	0.0941	0.0335
302	302	Vertebrals	12	54	-0.11	4.05	3.25	0.0154	0.0922	0.0356
303	303	Vertebrals	12	55	-0.114	4.11	3.06	0.00724	0.0951	0.0301
304	304	Vertebrals	12	56	-0.118	4.18	2.87	0.0107	0.0958	0.0267
305	305	Vertebrals	12	57	-0.122	4.24	2.68	0.00704	0.0956	0.0286
306	306	Vertebrals	12	58	-0.126	4.27	2.52	0.00649	0.0943	0.0326
307	307	Vertebrals	12	59	-0.13	4.31	2.37	0.006	0.0977	0.0206
308	308	Vertebrals	12	60	-0.135	4.34	2.21	0.0116	0.0974	0.0195
309	309	Vertebrals	12	61	-0.14	4.37	2.05	0.00533	0.0977	0.0206
310	310	Vertebrals	12	62	-0.145	4.4	1.89	0.00693	0.0985	0.0155
311	311	Vertebrals	12	63	-0.15	4.43	1.73	0.0067	0.0983	0.0172
312	312	Vertebrals	12	64	-0.155	4.46	1.58	0.012	0.0972	0.0202
313	313	Vertebrals	12	65	-0.16	4.49	1.42	0.00449	0.0978	0.0204
314	314	Vertebrals	12	66	-0.164	4.52	1.26	0.00127	0.099	0.0139
315	315	Vertebrals	12	67	-0.168	4.55	1.1	6.47e-05	0.0978	0.0209
316	316	Vertebrals	12	68	-0.171	4.59	0.944	0.00613	0.0969	0.0239
317	317	Vertebrals	12	69	-0.173	4.62	0.787	0.0106	0.0958	0.0268
318	318	Vertebrals	12	70	-0.175	4.66	0.63	0.00123	0.0967	0.0256
319	319	Vertebrals	12	71	-0.176	4.71	0.475	0.00196	0.0962	0.0272
320	320	Vertebrals	12	72	-0.175	4.74	0.312	0.000165	0.0928	0.0373
321	321	Vertebrals	12	73	-0.172	4.78	0.15	0.00599	0.0983	0.0173
322	322	Vertebrals	12	74	-0.169	4.8	-0.0142	0.00572	0.0987	0.0148
323	323	Vertebrals	12	75	-0.164	4.82	-0.179	-0.00359	0.0997	0.00693
324	324	Vertebrals	12	76	-0.159	4.84	-0.345	0.00586	0.0995	0.00783
325	325	Vertebrals	12	77	-0.153	4.85	-0.511	0.00292	0.0999	0.00314
326	326	Vertebrals	12	78	-0.148	4.85	-0.677	0.00329	0.0999	-0.00374
327	327	Vertebrals	12	79	-0.143	4.86	-0.843	0.0077	0.0997	-8.11e-05
328	328	Vertebrals	12	80	-0.139	4.87	-1.01	0.00806	0.0984	0.016
329	329	Vertebrals	12	81	-0.135	4.89	-1.17	0.00622	0.0995	0.00809
330	330	Vertebrals	12	82	-0.133	4.9	-1.34	0.00737	0.0996	-0.00465
331	331	Vertebrals	12	83	-0.133	4.9	-1.51	0.00307	0.0999	0.00421
332	332	Vertebrals	12	84	-0.135	4.91	-1.67	0.0118	0.0993	0.0022
333	333	Vertebrals	12	85	-0.138	4.93	-1.84	0.00574	0.0998	0.00304
334	334	Vertebrals	12	86	-0.144	4.93	-1.95	0.00894	0.0994	-0.00649
335	335	Vertebrals	12	87	-0.151	4.94	-2.06	0.00767	0.0996	0.00407
336	336	Vertebrals	12	88	-0.161	4.96	-2.17	0.00859	0.0993	0.00835
337	337	Vertebrals	12	89	-0.173	4.96	-2.29	0.00762	0.0996	0.00532
338	338	Vertebrals	12	90	-0.187	4.97	-2.4	0.0103	0.099	0.0101
339	339	Vertebrals	12	91	-0.201	4.97	-2.51	0.00742	0.0996	0.00477
340	340	Vertebrals	12	92	-0.215	4.98	-2.62	0.00925	0.0994	-0.00543
341	341	Vertebrals	12	93	-0.23	4.98	-2.73	0.0113	0.0993	0.00281
342	342	Vertebrals	12	94	-0.245	4.99	-2.84	0.00884	0.0991	0.00959
343	343	Vertebrals	12	95	-0.259	4.99	-2.96	0.00131	0.1	-0.000239
344	344	Vertebrals	12	96	-0.272	4.99	-3.07	0.00814	0.099	0.0116
345	345	Vertebrals	12	97	-0.286	5	-3.18	-0.00214	0.0992	0.0124
346	346	Vertebrals	12	98	-0.295	4.99	-3.29	-0.0139	0.0965	-0.0224
347	347	Vertebrals	12	99	-0.302	4.99	-3.4	-0.0342	0.0937	-0.00771
348	348	Vertebrals	12	100	-0.309	4.98	-3.53	0.024	0.0971	0.000509
349	349	Vertebrals	12	101	-0.317	4.98	-3.66	-0.0005	0.0993	0.012
350	350	Vertebrals	12	102	-0.321	4.97	-3.79	-0.00872	0.0995	-0.00412
351	351	Vertebrals	12	103	-0.326	4.97	-3.92	-0.00345	0.0998	-0.00432
352	352	Vertebrals	12	104	-0.332	4.97	-4.05	-0.0166	0.0983	0.00809
353	353	Vertebrals	12	105	-0.337	4.97	-4.18	0.000559	0.1	-0.000565
354	354	Vertebrals	12	106	-0.342	4.98	-4.31	0.00438	0.099	-0.0137
355	355	Vertebrals	12	107	-0.342	4.97	-4.44	0.00876	0.0996	-0.00297
356	356	Vertebrals	12	108	-0.34	4.96	-4.57	0.0287	0.0955	-0.00813
357	357	Vertebrals	12	109	-0.336	4.93	-4.7	0.0359	0.0918	-0.0168
358	358	Vertebrals	12	110	-0.333	4.91	-4.82	-0.0206	0.0934	-0.0291
359	359	Vertebrals	12	111	-0.33	4.88	-4.95	-0.0329	0.0922	-0.0204
360	360	Vertebrals	12	112	-0.326	4.84	-5.07	-0.0268	0.0902	-0.0338
361	361	Vertebrals	12	113	-0.325	4.8	-5.2	-0.0105	0.0994	-0.00365
362	362	Vertebrals	12	114	-0.331	4.81	-5.38	0.0116	0.0987	-0.0111
363	363	Vertebrals	12	115	-0.334	4.79	-5.56	0.00498	0.0996	-0.00709
364	364	Vertebrals	12	116	-0.338	4.77	-5.74	-0.000465	0.0998	-0.00646
365	365	Vertebrals	12	117	-0.342	4.75	-5.92	-0.0124	0.0991	-0.00589
366	366	Vertebrals	12	118	-0.346	4.73	-6.1	0.0129	0.0991	-0.00467
367	367	Vertebrals	12	119	-0.35	4.71	-6.29	0.00929	0.0989	-0.0115
368	368	Vertebrals	12	120	-0.355	4.7	-6.47	-0.00779	0.099	-0.0116
369	369	Vertebrals	12	121	-0.36	4.67	-6.65	-0.00409	0.0987	-0.0153
370	370	Vertebrals	12	122	-0.365	4.65	-6.83	-0.000567	0.0997	-0.00831
371	371	Vertebrals	12	123	-0.369	4.63	-7.01	-0.00106	0.0996	-0.00932
372	372	Vertebrals	12	124	-0.374	4.61	-7.19	-0.0033	0.0998	-0.00529
373	373	Vertebrals	12	125	-0.378	4.59	-7.38	-0.000905	0.0987	-0.0158
374	374	Vertebrals	12	126	-0.382	4.57	-7.56	0.00221	0.0998	-0.00667
375	375	Vertebrals	12	127	-0.385	4.54	-7.74	0.00464	0.0991	-0.0124
376	376	Vertebrals	12	128	-0.388	4.51	-7.91	0.00372	0.0986	-0.0162
377	377	Vertebrals	12	129	-0.39	4.47	-8.08	-0.00314	0.0973	-0.0227
378	378	Vertebrals	12	130	-0.392	4.43	-8.26	-0.00274	0.0964	-0.0265
379	379	Vertebrals	12	131	-0.395	4.38	-8.42	0.0052	0.0944	-0.0325
380	380	Vertebrals	12	132	-0.397	4.33	-8.59	-0.000796	0.0943	-0.0332
381	381	Vertebrals	12	133	-0.398	4.27	-8.76	0.00725	0.0947	-0.0312
382	382	Vertebrals	12	134	-0.4	4.2	-8.92	-0.00144	0.0941	-0.0338
383	383	Vertebrals	12	135	-0.401	4.15	-9.09	-0.000387	0.0975	-0.0223
384	384	Vertebrals	12	136	-0.403	4.1	-9.26	0.00297	0.0937	-0.0347
385	385	Vertebrals	12	137	-0.405	4.04	-9.43	0.00163	0.0962	-0.0273
386	386	Vertebrals	12	138	-0.407	3.99	-9.6	0.00838	0.0961	-0.0264
387	387	Vertebrals	12	139	-0.409	3.93	-9.76	0.00158	0.0898	-0.044
388	388	Vertebrals	12	140	-0.413	3.89	-9.93	-0.00466	0.0976	-0.0211
389	389	Vertebrals	12	141	-0.416	3.84	-10.1	-0.0067	0.095	-0.0306
390	390	Vertebrals	12	142	-0.419	3.79	-10.3	-0.0105	0.0951	-0.029
391	391	Vertebrals	12	143	-0.423	3.74	-10.4	0.00039	0.0959	-0.0283
392	392	Vertebrals	12	144	-0.427	3.7	-10.6	-0.00657	0.0944	-0.0325
393	393	Vertebrals	12	145	-0.43	3.64	-10.7	0.00462	0.0936	-0.0349
394	394	Vertebrals	12	146	-0.434	3.59	-10.9	0.00681	0.0934	-0.0349
395	395	Vertebrals	12	147	-0.437	3.53	-11	0.00513	0.0955	-0.0292
396	396	Vertebrals	12	148	-0.442	3.49	-11.2	0.0161	0.0948	-0.0273
397	397	Vertebrals	12	149	-0.447	3.46	-11.3	0.000907	0.0969	-0.0246
398	398	Vertebrals	12	150	-0.452	3.42	-11.5	0.0023	0.0984	-0.0175
399	399	Vertebrals	12	151	-0.457	3.39	-11.7	0.0159	0.0971	-0.0176
400	400	Vertebrals	12	152	-0.462	3.35	-11.8	-0.00015	0.0981	-0.0192
401	401	Vertebrals	12	153	-0.466	3.32	-12	0.00865	0.0972	-0.022
402	402	Vertebrals	12	154	-0.471	3.27	-12.1	-0.00963	0.0867	-0.0488
403	403	R_epi_hyo	13	2	-5.2	-2.69	6.35	0.0647	-0.0454	0.0613
404	404	R_epi_hyo	13	3	-5.2	-2.76	6.28	0.0671	-0.0575	0.0468
405	405	R_epi_hyo	13	4	-5.22	-2.82	6.21	0.0677	-0.0666	0.0313
406	406	R_epi_hyo	13	5	-5.24	-2.87	6.14	0.0622	-0.0732	0.0278
407	407	R_epi_hyo	13	6	-5.26	-2.92	6.06	0.0656	-0.0686	0.0314
408	408	R_epi_hyo	13	7	-5.27	-2.98	5.98	0.0679	-0.0616	0.04
409	409	R_epi_hyo	13	8	-5.29	-3.04	5.91	0.0581	-0.0746	0.0325
410	410	R_epi_hyo	13	9	-5.3	-3.08	5.83	0.0599	-0.075	0.028
411	411	R_epi_hyo	13	10	-5.32	-3.13	5.75	0.0601	-0.0709	0.037
412	412	R_epi_hyo	13	11	-5.33	-3.19	5.67	0.0632	-0.0595	0.0497
413	413	R_epi_hyo	13	12	-5.33	-3.24	5.59	0.0524	-0.0772	0.0358
414	414	R_epi_hyo	13	13	-5.34	-3.29	5.51	0.0519	-0.0778	0.0354
415	415	R_epi_hyo	13	14	-5.35	-3.33	5.43	0.0482	-0.0776	0.0407
416	416	R_epi_hyo	13	15	-5.35	-3.37	5.36	0.0435	-0.0829	0.0353
417	417	R_epi_hyo	13	16	-5.35	-3.4	5.28	0.0494	-0.0779	0.0387
418	418	R_epi_hyo	13	17	-5.35	-3.44	5.21	0.0556	-0.07	0.0448
419	419	R_epi_hyo	13	18	-5.34	-3.47	5.14	0.0545	-0.076	0.0354
420	420	R_epi_hyo	13	19	-5.33	-3.51	5.06	0.0606	-0.0665	0.0437
421	421	R_epi_hyo	13	20	-5.32	-3.54	4.99	0.0609	-0.0686	0.0397
422	422	R_epi_hyo	13	21	-5.31	-3.58	4.92	0.0644	-0.0576	0.0503
423	423	R_epi_hyo	13	22	-5.29	-3.61	4.85	0.0618	-0.0601	0.0508
424	424	R_epi_hyo	13	23	-5.28	-3.66	4.78	0.0633	-0.0551	0.0543
425	425	R_epi_hyo	13	24	-5.26	-3.7	4.72	0.052	-0.0549	0.0654
426	426	R_epi_hyo	13	25	-5.24	-3.76	4.66	0.0433	-0.0467	0.0771
427	427	R_epi_hyo	13	26	-5.21	-3.82	4.62	0.0365	-0.0511	0.0778
428	428	R_epi_hyo	13	27	-5.19	-3.89	4.58	0.0266	-0.0449	0.0853
429	429	R_epi_hyo	13	28	-5.18	-3.94	4.55	0.0166	-0.0449	0.0878
430	430	R_epi_hyo	13	29	-5.16	-4	4.53	0.00716	-0.0127	0.0989
431	431	R_epi_hyo	13	30	-5.15	-4.07	4.52	-0.00609	-0.0136	0.0989
432	432	R_epi_hyo	13	31	-5.13	-4.13	4.51	0.0143	-0.0159	0.0977
433	433	R_epi_hyo	13	32	-5.12	-4.19	4.51	-0.00696	-0.0176	0.0982
434	434	R_epi_hyo	13	33	-5.11	-4.25	4.5	-0.0365	-0.00107	0.0931
435	435	R_epi_hyo	13	34	-5.1	-4.32	4.51	-0.0402	0.0104	0.091
436	436	R_epi_hyo	13	35	-5.09	-4.38	4.51	-0.0524	-0.0217	0.0823
437	437	R_epi_hyo	13	36	-5.07	-4.44	4.52	-0.0836	-0.0297	0.0461
438	438	R_epi_hyo	13	37	-5.05	-4.5	4.53	-0.0842	-0.0355	0.0406
439	439	R_epi_hyo	13	38	-5.02	-4.56	4.54	-0.0849	-0.0412	0.0331
440	440	R_epi_hyo	13	39	-4.98	-4.6	4.57	-0.0734	-0.0618	0.0282
441	441	R_epi_hyo	13	40	-4.94	-4.64	4.6	-0.0766	-0.0629	0.0133
442	442	R_epi_hyo	13	41	-4.9	-4.68	4.64	-0.0747	-0.0652	0.013
443	443	R_epi_hyo	13	42	-4.86	-4.71	4.68	-0.068	-0.0718	0.0152
444	444	R_epi_hyo	13	43	-4.82	-4.74	4.73	-0.0689	-0.0718	0.00961
445	445	R_epi_hyo	13	44	-4.79	-4.76	4.78	-0.0659	-0.0724	0.0202
446	446	R_epi_hyo	13	45	-4.75	-4.77	4.83	-0.0591	-0.0776	0.0222
447	447	R_epi_hyo	13	46	-4.72	-4.78	4.89	-0.0703	-0.0705	0.00948
448	448	R_epi_hyo	13	47	-4.69	-4.79	4.94	-0.0691	-0.067	0.0269
449	449	R_epi_hyo	13	48	-4.67	-4.8	5	-0.0659	-0.0725	0.02
450	450	R_epi_hyo	13	49	-4.64	-4.81	5.06	-0.0727	-0.0618	0.0299
451	451	R_epi_hyo	13	50	-4.61	-4.81	5.12	-0.0755	-0.053	0.0387
452	452	R_epi_hyo	13	51	-4.58	-4.81	5.18	-0.0837	-0.0312	0.045
453	453	R_epi_hyo	13	52	-4.56	-4.82	5.24	-0.0872	-0.0331	0.036
454	454	R_epi_hyo	13	53	-4.53	-4.82	5.3	-0.0868	-0.0234	0.0437
455	455	R_epi_hyo	13	54	-4.5	-4.82	5.37	-0.0915	-0.0213	0.0342
456	456	R_epi_hyo	13	55	-4.47	-4.82	5.44	-0.0859	-0.0264	0.0439
457	457	R_epi_hyo	13	56	-4.43	-4.82	5.51	-0.0804	-0.0405	0.0434
458	458	R_epi_hyo	13	57	-4.4	-4.81	5.58	-0.0844	-0.0397	0.0359
459	459	R_epi_hyo	13	58	-4.37	-4.8	5.65	-0.0809	-0.0461	0.0365
460	460	R_epi_hyo	13	59	-4.35	-4.79	5.72	-0.0904	-0.0162	0.0395
461	461	R_epi_hyo	13	60	-4.31	-4.78	5.79	-0.0868	-0.0152	0.0473
462	462	R_epi_hyo	13	61	-4.27	-4.77	5.85	-0.0831	-0.0217	0.0512
463	463	R_epi_hyo	13	62	-4.24	-4.77	5.92	-0.0851	0.0332	0.0407
464	464	R_epi_hyo	13	63	-4.2	-4.76	5.99	-0.0831	0.0413	0.0372
465	465	R_epi_hyo	13	64	-4.18	-4.75	6.06	-0.0883	0.0206	0.0422
466	466	R_epi_hyo	13	65	-4.14	-4.75	6.13	-0.0821	0.0344	0.0455
467	467	R_epi_hyo	13	66	-4.12	-4.75	6.2	-0.0955	0.0285	0.0077
468	468	R_epi_hyo	13	67	-4.09	-4.74	6.29	-0.0945	0.0145	0.0293
469	469	R_epi_hyo	13	68	-4.06	-4.75	6.38	-0.0954	0.00335	0.0298
470	470	R_epi_hyo	13	69	-4.03	-4.75	6.46	-0.092	-0.000165	0.0391
471	471	R_epi_hyo	13	70	-3.99	-4.76	6.54	-0.0885	-0.0108	0.0453
472	472	R_epi_hyo	13	71	-3.95	-4.77	6.63	-0.0889	-0.0225	0.0398
473	473	R_epi_hyo	13	72	-3.91	-4.77	6.71	-0.0766	-0.0508	0.0395
474	474	R_epi_hyo	13	73	-3.86	-4.78	6.78	-0.0691	-0.0605	0.0396
475	475	R_epi_hyo	13	74	-3.82	-4.78	6.86	-0.0688	-0.0642	0.0339
476	476	R_epi_hyo	13	75	-3.78	-4.78	6.95	-0.0739	-0.0613	0.028
477	477	R_epi_hyo	13	76	-3.74	-4.79	7.03	-0.0657	-0.0732	0.018
478	478	R_epi_hyo	13	77	-3.71	-4.8	7.11	-0.0496	-0.0847	0.019
479	479	R_epi_hyo	13	78	-3.67	-4.81	7.19	-0.0687	-0.0719	0.0108
480	480	R_epi_hyo	13	79	-3.64	-4.83	7.28	-0.0695	-0.0688	0.0209
481	481	R_epi_hyo	13	80	-3.59	-4.84	7.36	-0.0597	-0.0756	0.0268
482	482	R_epi_hyo	13	81	-3.54	-4.84	7.44	-0.0579	-0.0713	0.0394
483	483	R_epi_hyo	13	82	-3.49	-4.85	7.52	-0.0638	-0.0698	0.0325
484	484	R_epi_hyo	13	83	-3.44	-4.86	7.61	-0.0657	-0.0728	0.0195
485	485	R_epi_hyo	13	84	-3.39	-4.88	7.69	-0.0564	-0.0771	0.0296
486	486	R_epi_hyo	13	85	-3.34	-4.88	7.77	-0.0544	-0.0785	0.0296
487	487	R_epi_hyo	13	86	-3.29	-4.89	7.85	-0.0525	-0.0806	0.0274
488	488	R_epi_hyo	13	87	-3.23	-4.9	7.93	-0.0595	-0.0749	0.029
489	489	R_epi_hyo	13	88	-3.18	-4.91	8.01	-0.0575	-0.0687	0.0444
490	490	R_epi_hyo	13	89	-3.12	-4.92	8.09	-0.0606	-0.0733	0.0309
491	491	R_epi_hyo	13	90	-3.06	-4.93	8.16	-0.0615	-0.074	0.0271
492	492	R_epi_hyo	13	91	-3.01	-4.94	8.24	-0.0698	-0.0666	0.0263
493	493	R_epi_hyo	13	92	-2.95	-4.95	8.32	-0.0535	-0.0749	0.039
494	494	R_epi_hyo	13	93	-2.91	-4.96	8.39	-0.0643	-0.0694	0.0325
495	495	R_epi_hyo	13	94	-2.86	-4.96	8.45	-0.0648	-0.0634	0.0422
496	496	R_epi_hyo	13	95	-2.82	-4.97	8.52	-0.0639	-0.0615	0.0462
497	497	R_epi_hyo	13	96	-2.77	-4.97	8.59	-0.0688	-0.0535	0.0491
498	498	R_epi_hyo	13	97	-2.73	-4.97	8.65	-0.0678	-0.0486	0.0552
499	499	R_epi_hyo	13	98	-2.68	-4.97	8.72	-0.0736	-0.0427	0.0525
500	500	R_epi_hyo	13	99	-2.62	-4.97	8.78	-0.0724	-0.0268	0.0636
501	501	R_epi_hyo	13	100	-2.57	-4.97	8.84	-0.0675	-0.0277	0.0683
502	502	R_epi_hyo	13	101	-2.51	-4.97	8.9	-0.0691	-0.0206	0.0693
503	503	R_epi_hyo	13	102	-2.45	-4.98	8.95	-0.0647	-0.0118	0.0753
504	504	R_epi_hyo	13	103	-2.39	-4.99	9	-0.0638	-0.01	0.0764
505	505	R_epi_hyo	13	104	-2.33	-5	9.05	-0.0721	-0.00316	0.0692
506	506	R_epi_hyo	13	105	-2.26	-5.02	9.1	-0.0559	-0.00978	0.0823
507	507	R_epi_hyo	13	106	-2.19	-5.05	9.15	-0.0586	-0.0181	0.079
508	508	R_epi_hyo	13	107	-2.12	-5.09	9.19	-0.0527	-0.0329	0.0784
509	509	R_epi_hyo	13	108	-2.04	-5.13	9.22	-0.0518	-0.0365	0.0774
510	510	R_epi_hyo	13	109	-1.97	-5.17	9.26	-0.0601	-0.043	0.0674
511	511	R_epi_hyo	13	110	-1.89	-5.21	9.29	-0.0536	-0.0425	0.0729
512	512	R_epi_hyo	13	111	-1.81	-5.26	9.31	-0.0475	-0.057	0.067
513	513	R_epi_hyo	13	112	-1.73	-5.3	9.33	-0.0507	-0.0582	0.0636
514	514	R_epi_hyo	13	113	-1.66	-5.35	9.35	-0.0457	-0.0644	0.0614
515	515	R_epi_hyo	13	114	-1.58	-5.39	9.36	-0.0549	-0.0585	0.0597
516	516	R_epi_hyo	13	115	-1.5	-5.44	9.38	-0.0509	-0.0719	0.0473
517	517	R_epi_hyo	13	116	-1.42	-5.48	9.4	-0.0445	-0.071	0.0546
518	518	R_epi_hyo	13	117	-1.34	-5.51	9.42	-0.0464	-0.067	0.0579
519	519	R_epi_hyo	13	118	-1.25	-5.55	9.45	-0.0399	-0.0676	0.062
520	520	R_epi_hyo	13	119	-1.18	-5.58	9.47	-0.0471	-0.0633	0.0615
521	521	R_epi_hyo	13	120	-1.1	-5.61	9.49	-0.038	-0.0681	0.0626
522	522	R_epi_hyo	13	121	-1.02	-5.63	9.51	-0.0379	-0.0694	0.0612
523	523	R_epi_hyo	13	122	-0.944	-5.66	9.54	-0.0458	-0.0696	0.0553
524	524	R_epi_hyo	13	123	-0.869	-5.69	9.56	-0.0505	-0.0706	0.0496
525	525	R_epi_hyo	13	124	-0.79	-5.71	9.59	-0.0309	-0.0803	0.0509
526	526	R_epi_hyo	13	125	-0.709	-5.73	9.61	-0.0348	-0.0792	0.0502
527	527	R_epi_hyo	13	126	-0.629	-5.75	9.63	-0.0264	-0.0699	0.0664
528	528	R_epi_hyo	13	127	-0.548	-5.76	9.65	-0.0321	-0.0741	0.0589
529	529	R_epi_hyo	13	128	-0.466	-5.77	9.67	-0.0167	-0.0738	0.0653
530	530	R_epi_hyo	13	129	-0.382	-5.78	9.68	-0.00238	-0.0752	0.0659
531	531	R_epi_hyo	13	130	-0.297	-5.78	9.68	-0.00655	-0.0723	0.0688
532	532	R_hyo_hypo	14	2	-6.08	0.265	-5.66	0.0601	-0.0718	-0.0351
533	533	R_hyo_hypo	14	3	-6.16	0.151	-5.58	0.045	-0.0835	-0.0316
534	534	R_hyo_hypo	14	4	-6.24	0.036	-5.51	0.0723	-0.059	-0.036
535	535	R_hyo_hypo	14	5	-6.31	-0.0928	-5.44	0.0493	-0.0618	-0.0612
536	536	R_hyo_hypo	14	6	-6.39	-0.216	-5.38	0.0205	-0.0659	-0.0723
537	537	R_hyo_hypo	14	7	-6.48	-0.323	-5.3	0.00239	-0.0701	-0.0713
538	538	R_hyo_hypo	14	8	-6.57	-0.413	-5.2	0.0016	-0.0777	-0.063
539	539	R_hyo_hypo	14	9	-6.66	-0.497	-5.1	-0.00473	-0.0795	-0.0605
540	540	R_hyo_hypo	14	10	-6.74	-0.587	-4.99	-0.0136	-0.077	-0.0623
541	541	R_hyo_hypo	14	11	-6.82	-0.667	-4.88	-0.0188	-0.0757	-0.0626
542	542	R_hyo_hypo	14	12	-6.9	-0.742	-4.76	-0.016	-0.0801	-0.0578
543	543	R_hyo_hypo	14	13	-6.97	-0.812	-4.63	-0.0195	-0.0762	-0.0618
544	544	R_hyo_hypo	14	14	-7.03	-0.891	-4.51	-0.016	-0.0803	-0.0574
545	545	R_hyo_hypo	14	15	-7.09	-0.965	-4.38	-0.0229	-0.0709	-0.0667
546	546	R_hyo_hypo	14	16	-7.12	-1.02	-4.29	-0.0309	-0.0795	-0.0522
547	547	R_hyo_hypo	14	17	-7.15	-1.07	-4.19	-0.0357	-0.075	-0.0556
548	548	R_hyo_hypo	14	18	-7.18	-1.13	-4.1	-0.0332	-0.0775	-0.0538
549	549	R_hyo_hypo	14	19	-7.2	-1.18	-4.01	-0.0261	-0.0788	-0.0558
550	550	R_hyo_hypo	14	20	-7.22	-1.24	-3.91	-0.0253	-0.0824	-0.0507
551	551	R_hyo_hypo	14	21	-7.24	-1.29	-3.82	-0.0326	-0.0803	-0.0499
552	552	R_hyo_hypo	14	22	-7.26	-1.35	-3.72	-0.0322	-0.0784	-0.053
553	553	R_hyo_hypo	14	23	-7.28	-1.41	-3.63	-0.0194	-0.0787	-0.0585
554	554	R_hyo_hypo	14	24	-7.29	-1.46	-3.53	-0.0153	-0.0878	-0.0454
555	555	R_hyo_hypo	14	25	-7.3	-1.51	-3.43	-0.0235	-0.0873	-0.0427
556	556	R_hyo_hypo	14	26	-7.32	-1.57	-3.34	-0.0228	-0.075	-0.0621
557	557	R_hyo_hypo	14	27	-7.33	-1.63	-3.25	-0.0257	-0.0828	-0.0499
558	558	R_hyo_hypo	14	28	-7.35	-1.68	-3.15	-0.0172	-0.0891	-0.042
559	559	R_hyo_hypo	14	29	-7.36	-1.73	-3.05	-0.0275	-0.0846	-0.0457
560	560	R_hyo_hypo	14	30	-7.38	-1.77	-2.95	-0.0203	-0.0891	-0.0405
561	561	R_hyo_hypo	14	31	-7.4	-1.81	-2.85	-0.0333	-0.0833	-0.0442
562	562	R_hyo_hypo	14	32	-7.42	-1.86	-2.75	-0.0329	-0.0872	-0.0362
563	563	R_hyo_hypo	14	33	-7.44	-1.89	-2.64	-0.0393	-0.0821	-0.0414
564	564	R_hyo_hypo	14	34	-7.46	-1.93	-2.54	-0.0492	-0.0764	-0.0418
565	565	R_hyo_hypo	14	35	-7.48	-1.97	-2.43	-0.0572	-0.0746	-0.0341
566	566	R_hyo_hypo	14	36	-7.49	-2.01	-2.33	-0.0573	-0.0732	-0.0369
567	567	R_hyo_hypo	14	37	-7.51	-2.04	-2.22	-0.0584	-0.0721	-0.0374
568	568	R_hyo_hypo	14	38	-7.52	-2.07	-2.12	-0.0685	-0.0725	-0.0078
569	569	R_hyo_hypo	14	39	-7.54	-2.11	-2.01	-0.0861	-0.0455	-0.0226
570	570	R_hyo_hypo	14	40	-7.54	-2.13	-1.9	-0.0905	-0.041	-0.0114
571	571	R_hyo_hypo	14	41	-7.54	-2.15	-1.79	-0.0998	-0.00106	0.00608
572	572	R_hyo_hypo	14	42	-7.54	-2.18	-1.68	-0.0578	-0.0779	-0.0243
573	573	R_hyo_hypo	14	43	-7.54	-2.22	-1.57	-0.0457	-0.0839	-0.0295
574	574	R_hyo_hypo	14	44	-7.53	-2.24	-1.49	-0.0414	-0.0844	-0.0341
575	575	R_hyo_hypo	14	45	-7.53	-2.29	-1.42	-0.0488	-0.0671	-0.0558
576	576	R_hyo_hypo	14	46	-7.52	-2.33	-1.34	-0.0455	-0.0839	-0.0298
577	577	R_hyo_hypo	14	47	-7.5	-2.36	-1.26	-0.0417	-0.084	-0.0348
578	578	R_hyo_hypo	14	48	-7.49	-2.4	-1.19	-0.0632	-0.0751	-0.0193
579	579	R_hyo_hypo	14	49	-7.47	-2.44	-1.11	-0.0749	-0.0427	-0.0506
580	580	R_hyo_hypo	14	50	-7.45	-2.49	-1.04	-0.0922	-0.0364	0.0132
581	581	R_hyo_hypo	14	51	-7.44	-2.54	-0.97	-0.0997	0.00374	-0.0067
582	582	R_hyo_hypo	14	52	-7.43	-2.59	-0.899	-0.0921	-0.0378	-0.00974
583	583	R_hyo_hypo	14	53	-7.42	-2.63	-0.824	-0.0921	-0.0371	-0.0115
584	584	R_hyo_hypo	14	54	-7.41	-2.67	-0.751	-0.0761	-0.06	-0.0247
585	585	R_hyo_hypo	14	55	-7.4	-2.71	-0.673	-0.0809	-0.0584	-0.00673
586	586	R_hyo_hypo	14	56	-7.39	-2.74	-0.594	-0.0906	-0.0417	-0.00725
587	587	R_hyo_hypo	14	57	-7.38	-2.77	-0.513	-0.0847	-0.0478	-0.0235
588	588	R_hyo_hypo	14	58	-7.38	-2.81	-0.411	-0.0691	-0.0716	-0.0103
589	589	R_hyo_hypo	14	59	-7.36	-2.84	-0.306	-0.0865	-0.05	-0.00425
590	590	R_hyo_hypo	14	60	-7.34	-2.85	-0.2	-0.0874	-0.045	0.0181
591	591	R_hyo_hypo	14	61	-7.31	-2.85	-0.0944	-0.0977	-0.00468	0.0208
592	592	R_hyo_hypo	14	62	-7.28	-2.84	0.0102	-0.096	0.018	0.0214
593	593	R_hyo_hypo	14	63	-7.28	-2.86	0.118	-0.0856	0.0482	-0.0186
594	594	R_hyo_hypo	14	64	-7.32	-2.91	0.209	-0.0796	0.0598	-0.00942
595	595	R_hyo_hypo	14	65	-7.33	-2.95	0.31	-0.0974	-0.0205	-0.0098
596	596	R_hyo_hypo	14	66	-7.34	-2.98	0.415	-0.0963	-0.0257	-0.00828
597	597	R_hyo_hypo	14	67	-7.36	-3.01	0.515	-0.0808	-0.0532	-0.0252
598	598	R_hyo_hypo	14	68	-7.37	-3.06	0.615	-0.0495	-0.0812	-0.031
599	599	R_hyo_hypo	14	69	-7.38	-3.07	0.723	-0.0645	-0.0747	-0.0165
600	600	R_hyo_hypo	14	70	-7.38	-3.1	0.828	-0.0623	-0.0747	-0.0233
601	601	R_hyo_hypo	14	71	-7.39	-3.12	0.935	-0.0272	-0.0914	-0.0303
602	602	R_hyo_hypo	14	72	-7.4	-3.13	1.03	-0.0644	-0.0758	-0.0101
603	603	R_hyo_hypo	14	73	-7.41	-3.15	1.12	-0.0614	-0.0779	-0.0127
604	604	R_hyo_hypo	14	74	-7.41	-3.16	1.22	-0.0636	-0.0749	-0.0188
605	605	R_hyo_hypo	14	75	-7.43	-3.17	1.31	-0.0628	-0.077	-0.0112
606	606	R_hyo_hypo	14	76	-7.44	-3.17	1.4	-0.0686	-0.0725	-0.00646
607	607	R_hyo_hypo	14	77	-7.45	-3.17	1.5	-0.076	-0.0647	-0.00629
608	608	R_hyo_hypo	14	78	-7.46	-3.17	1.59	-0.0813	-0.0575	-0.00925
609	609	R_hyo_hypo	14	79	-7.46	-3.17	1.69	-0.0862	-0.0506	0.00317
610	610	R_hyo_hypo	14	80	-7.46	-3.16	1.78	-0.0864	-0.0488	0.0122
611	611	R_hyo_hypo	14	81	-7.46	-3.15	1.88	-0.0864	-0.0494	-0.00986
612	612	R_hyo_hypo	14	82	-7.46	-3.15	1.97	-0.0914	-0.0403	-0.00393
613	613	R_hyo_hypo	14	83	-7.47	-3.15	2.07	-0.0737	-0.064	-0.0218
614	614	R_hyo_hypo	14	84	-7.48	-3.16	2.16	-0.0732	-0.067	-0.012
615	615	R_hyo_hypo	14	85	-7.49	-3.18	2.25	-0.081	-0.0586	-0.00333
616	616	R_hyo_hypo	14	86	-7.48	-3.18	2.4	-0.0723	-0.069	-0.00125
617	617	R_hyo_hypo	14	87	-7.49	-3.2	2.55	-0.0261	-0.0917	0.0301
618	618	R_hyo_hypo	14	88	-7.45	-3.19	2.69	-0.0803	-0.0585	0.0115
619	619	R_hyo_hypo	14	89	-7.42	-3.18	2.84	-0.0544	-0.0806	0.0234
620	620	R_hyo_hypo	14	90	-7.4	-3.18	2.98	-0.0708	-0.0704	0.00486
621	621	R_hyo_hypo	14	91	-7.38	-3.18	3.13	-0.0771	-0.0633	0.00702
622	622	R_hyo_hypo	14	92	-7.37	-3.19	3.28	-0.0763	-0.0642	0.00735
623	623	R_hyo_hypo	14	93	-7.35	-3.2	3.43	-0.0635	-0.0772	-0.00374
624	624	R_hyo_hypo	14	94	-7.34	-3.21	3.57	-0.0417	-0.0909	-4.25e-05
625	625	R_hyo_hypo	14	95	-7.3	-3.21	3.72	-0.0339	-0.0936	0.00908
626	626	R_hyo_hypo	14	96	-7.27	-3.21	3.86	-0.0437	-0.0892	0.0114
627	627	R_hyo_hypo	14	97	-7.23	-3.21	4.01	-0.0495	-0.0864	0.00873
628	628	R_hyo_hypo	14	98	-7.19	-3.21	4.15	-0.0518	-0.0855	-0.00078
629	629	R_hyo_hypo	14	99	-7.15	-3.22	4.29	-0.0389	-0.0897	0.0211
630	630	R_hyo_hypo	14	100	-7.12	-3.22	4.39	-0.0448	-0.089	0.00854
631	631	R_hyo_hypo	14	101	-7.09	-3.23	4.49	-0.0622	-0.0774	0.012
632	632	R_hyo_hypo	14	102	-7.05	-3.24	4.59	-0.0619	-0.0776	0.0125
633	633	R_hyo_hypo	14	103	-7.01	-3.25	4.68	-0.0511	-0.0852	0.0111
634	634	R_hyo_hypo	14	104	-6.97	-3.26	4.78	-0.0568	-0.0819	0.0079
635	635	R_hyo_hypo	14	105	-6.93	-3.28	4.87	-0.0552	-0.0826	0.0113
636	636	R_hyo_hypo	14	106	-6.88	-3.29	4.97	-0.0537	-0.0831	0.0142
637	637	R_hyo_hypo	14	107	-6.83	-3.3	5.06	-0.0518	-0.081	0.0274
638	638	R_hyo_hypo	14	108	-6.78	-3.3	5.14	-0.0479	-0.0842	0.0247
639	639	R_hyo_hypo	14	109	-6.73	-3.31	5.23	-0.0479	-0.0866	0.0142
640	640	R_hyo_hypo	14	110	-6.67	-3.32	5.32	-0.0378	-0.0893	0.0242
641	641	R_hyo_hypo	14	111	-6.61	-3.32	5.41	-0.0421	-0.0901	0.0107
642	642	R_hyo_hypo	14	112	-6.56	-3.33	5.5	-0.0337	-0.0911	0.0237
643	643	R_hyo_hypo	14	113	-6.5	-3.33	5.58	-0.0415	-0.0871	0.0262
644	644	R_hyo_hypo	14	114	-6.42	-3.34	5.68	-0.0186	-0.0969	0.0165
645	645	R_hyo_hypo	14	115	-6.33	-3.34	5.78	-0.00941	-0.0992	0.00808
646	646	R_hyo_hypo	14	116	-6.24	-3.33	5.88	-0.0105	-0.0967	0.0232
647	647	R_hyo_hypo	14	117	-6.14	-3.32	5.96	-0.00496	-0.0951	0.0305
648	648	R_hyo_hypo	14	118	-6.04	-3.29	6.03	0.00352	-0.0965	0.0261
649	649	R_hyo_hypo	14	119	-5.93	-3.27	6.11	0.0108	-0.0939	0.0328
650	650	R_hyo_hypo	14	120	-5.83	-3.22	6.17	0.0221	-0.0877	0.0427
651	651	R_hyo_hypo	14	121	-5.72	-3.16	6.22	0.0329	-0.0847	0.0417
652	652	R_hyo_hypo	14	122	-5.62	-3.08	6.26	0.0458	-0.0772	0.0441
653	653	R_hyo_hypo	14	123	-5.54	-2.99	6.29	0.0554	-0.0733	0.0395
654	654	R_hyo_hypo	14	124	-5.44	-2.91	6.33	0.0527	-0.0747	0.0406
655	655	R_hyo_hypo	14	125	-5.35	-2.82	6.36	0.0567	-0.0645	0.0513
656	656	R_hyo_hypo	14	126	-5.27	-2.73	6.39	0.0596	-0.0501	0.0628
657	657	R_hypo_xiphi	15	2	-0.657	0.38	-8.61	-0.00185	-0.0574	-0.0819
658	658	R_hypo_xiphi	15	3	-0.734	0.397	-8.63	0.0103	-0.0387	-0.0916
659	659	R_hypo_xiphi	15	4	-0.811	0.413	-8.64	0.00575	-0.0223	-0.0973
660	660	R_hypo_xiphi	15	5	-0.885	0.441	-8.64	0.0188	0.0126	-0.0974
661	661	R_hypo_xiphi	15	6	-0.959	0.442	-8.67	0.0183	0.00165	-0.0983
662	662	R_hypo_xiphi	15	7	-1.04	0.454	-8.69	0.0279	-0.0572	-0.0771
663	663	R_hypo_xiphi	15	8	-1.11	0.448	-8.73	0.0321	0.00492	-0.0946
664	664	R_hypo_xiphi	15	9	-1.18	0.447	-8.75	0.0289	0.00563	-0.0956
665	665	R_hypo_xiphi	15	10	-1.26	0.453	-8.78	0.029	0.0143	-0.0946
666	666	R_hypo_xiphi	15	11	-1.33	0.471	-8.79	0.0329	0.0113	-0.0937
667	667	R_hypo_xiphi	15	12	-1.41	0.467	-8.83	0.0453	-0.0397	-0.0799
668	668	R_hypo_xiphi	15	13	-1.48	0.466	-8.85	0.0161	-0.0615	-0.0772
669	669	R_hypo_xiphi	15	14	-1.56	0.474	-8.88	0.0146	-0.0746	-0.0649
670	670	R_hypo_xiphi	15	15	-1.63	0.48	-8.9	0.00613	-0.0839	-0.054
671	671	R_hypo_xiphi	15	16	-1.68	0.486	-8.92	0.0127	-0.086	-0.0495
672	672	R_hypo_xiphi	15	17	-1.72	0.493	-8.94	0.00576	-0.0881	-0.047
673	673	R_hypo_xiphi	15	18	-1.76	0.502	-8.96	0.00831	-0.0872	-0.0482
674	674	R_hypo_xiphi	15	19	-1.8	0.51	-8.99	0.0115	-0.0881	-0.0458
675	675	R_hypo_xiphi	15	20	-1.85	0.521	-9.01	-0.0051	-0.0755	-0.0653
676	676	R_hypo_xiphi	15	21	-1.89	0.534	-9.03	0.0113	-0.0794	-0.0597
677	677	R_hypo_xiphi	15	22	-1.93	0.546	-9.06	0.00722	-0.0784	-0.0616
678	678	R_hypo_xiphi	15	23	-1.97	0.559	-9.07	0.0129	-0.0684	-0.0718
679	679	R_hypo_xiphi	15	24	-2.02	0.57	-9.09	0.00732	-0.074	-0.0668
680	680	R_hypo_xiphi	15	25	-2.06	0.582	-9.1	0.0107	-0.0252	-0.0962
681	681	R_hypo_xiphi	15	26	-2.11	0.589	-9.11	0.0258	-0.0191	-0.0947
682	682	R_hypo_xiphi	15	27	-2.16	0.592	-9.12	0.0156	-0.0158	-0.0975
683	683	R_hypo_xiphi	15	28	-2.21	0.593	-9.12	-0.013	-0.00931	-0.0987
684	684	R_hypo_xiphi	15	29	-2.26	0.59	-9.11	-0.0223	0.00101	-0.0975
685	685	R_hypo_xiphi	15	30	-2.31	0.581	-9.1	-0.0284	0.0144	-0.0948
686	686	R_hypo_xiphi	15	31	-2.36	0.57	-9.08	-0.038	0.00474	-0.0924
687	687	R_hypo_xiphi	15	32	-2.4	0.556	-9.06	-0.0524	0.0111	-0.0844
688	688	R_hypo_xiphi	15	33	-2.45	0.54	-9.03	-0.0624	0.0306	-0.0719
689	689	R_hypo_xiphi	15	34	-2.49	0.523	-9	-0.0715	0.0432	-0.0549
690	690	R_hypo_xiphi	15	35	-2.52	0.503	-8.96	-0.0776	0.039	-0.0496
691	691	R_hypo_xiphi	15	36	-2.56	0.484	-8.93	-0.0564	0.0621	-0.0544
692	692	R_hypo_xiphi	15	37	-2.6	0.463	-8.9	-0.0646	0.0442	-0.0622
693	693	R_hypo_xiphi	15	38	-2.64	0.442	-8.86	-0.0768	0.00429	-0.0639
694	694	R_hypo_xiphi	15	39	-2.67	0.421	-8.83	-0.0755	-0.00543	-0.0653
695	695	R_hypo_xiphi	15	40	-2.71	0.4	-8.8	-0.0587	0.00275	-0.0809
696	696	R_hypo_xiphi	15	41	-2.75	0.378	-8.76	-0.0563	-0.0347	-0.075
697	697	R_hypo_xiphi	15	42	-2.78	0.358	-8.72	-0.0649	-0.039	-0.0653
698	698	R_hypo_xiphi	15	43	-2.81	0.341	-8.68	-0.0738	-0.032	-0.0594
699	699	R_hypo_xiphi	15	44	-2.85	0.318	-8.63	-0.0435	-0.048	-0.0762
700	700	R_hypo_xiphi	15	45	-2.9	0.294	-8.58	-0.0527	-0.0593	-0.0609
701	701	R_hypo_xiphi	15	46	-2.94	0.27	-8.53	-0.0343	-0.0711	-0.0614
702	702	R_hypo_xiphi	15	47	-2.99	0.246	-8.47	-0.0307	-0.0475	-0.0825
703	703	R_hypo_xiphi	15	48	-3.03	0.22	-8.43	-0.0292	-0.0698	-0.0654
704	704	R_hypo_xiphi	15	49	-3.08	0.195	-8.37	-0.0401	-0.0633	-0.0662
705	705	R_hypo_xiphi	15	50	-3.12	0.169	-8.32	-0.0365	-0.0639	-0.0677
706	706	R_hypo_xiphi	15	51	-3.16	0.141	-8.27	-0.0332	-0.0755	-0.0566
707	707	R_hypo_xiphi	15	52	-3.2	0.118	-8.22	-0.041	-0.0723	-0.0556
708	708	R_hypo_xiphi	15	53	-3.24	0.0935	-8.16	-0.0321	-0.0742	-0.0588
709	709	R_hypo_xiphi	15	54	-3.28	0.068	-8.11	-0.0455	-0.0681	-0.0575
710	710	R_hypo_xiphi	15	55	-3.32	0.0434	-8.05	-0.0461	-0.0652	-0.0602
711	711	R_hypo_xiphi	15	56	-3.35	0.0188	-7.99	-0.0446	-0.0717	-0.0536
712	712	R_hypo_xiphi	15	57	-3.39	-0.0117	-7.94	-0.0362	-0.0665	-0.0654
713	713	R_hypo_xiphi	15	58	-3.44	-0.047	-7.87	-0.0414	-0.0649	-0.0638
714	714	R_hypo_xiphi	15	59	-3.48	-0.0856	-7.8	-0.0405	-0.0648	-0.0644
715	715	R_hypo_xiphi	15	60	-3.53	-0.122	-7.73	-0.0398	-0.0694	-0.06
716	716	R_hypo_xiphi	15	61	-3.57	-0.16	-7.66	-0.0421	-0.0736	-0.053
717	717	R_hypo_xiphi	15	62	-3.61	-0.192	-7.59	-0.0388	-0.0717	-0.058
718	718	R_hypo_xiphi	15	63	-3.65	-0.225	-7.51	-0.0398	-0.0741	-0.0541
719	719	R_hypo_xiphi	15	64	-3.69	-0.256	-7.43	-0.0541	-0.0621	-0.0567
720	720	R_hypo_xiphi	15	65	-3.73	-0.29	-7.36	-0.0607	-0.0557	-0.0567
721	721	R_hypo_xiphi	15	66	-3.76	-0.319	-7.28	-0.0663	-0.0638	-0.0391
722	722	R_hypo_xiphi	15	67	-3.8	-0.35	-7.2	-0.0681	-0.055	-0.0483
723	723	R_hypo_xiphi	15	68	-3.83	-0.382	-7.12	-0.0625	-0.0546	-0.0557
724	724	R_hypo_xiphi	15	69	-3.86	-0.422	-7.05	-0.0681	-0.0565	-0.0466
725	725	R_hypo_xiphi	15	70	-3.89	-0.457	-6.97	-0.0508	-0.0639	-0.0577
726	726	R_hypo_xiphi	15	71	-3.93	-0.502	-6.9	-0.0521	-0.0527	-0.0671
727	727	R_hypo_xiphi	15	72	-3.96	-0.538	-6.84	-0.064	-0.0546	-0.0541
728	728	R_hypo_xiphi	15	73	-3.99	-0.579	-6.78	-0.0577	-0.0474	-0.0666
729	729	R_hypo_xiphi	15	74	-4.01	-0.618	-6.72	-0.0836	-0.0416	-0.0358
730	730	R_hypo_xiphi	15	75	-4.04	-0.654	-6.66	-0.0856	-0.0288	-0.0429
731	731	R_hypo_xiphi	15	76	-4.05	-0.687	-6.59	-0.0868	-0.0297	-0.0398
732	732	R_hypo_xiphi	15	77	-4.06	-0.72	-6.52	-0.0762	-0.0512	-0.0397
733	733	R_hypo_xiphi	15	78	-4.08	-0.755	-6.46	-0.0783	-0.0474	-0.0403
734	734	R_hypo_xiphi	15	79	-4.09	-0.793	-6.39	-0.08	-0.0377	-0.0466
735	735	R_hypo_xiphi	15	80	-4.1	-0.829	-6.33	-0.0867	-0.0447	-0.022
736	736	R_hypo_xiphi	15	81	-4.11	-0.864	-6.26	-0.0824	-0.038	-0.042
737	737	R_hypo_xiphi	15	82	-4.13	-0.904	-6.2	-0.072	-0.05	-0.0482
738	738	R_hypo_xiphi	15	83	-4.14	-0.943	-6.13	-0.0829	-0.0369	-0.042
739	739	R_hypo_xiphi	15	84	-4.16	-0.983	-6.07	-0.0843	-0.029	-0.0454
740	740	R_hypo_xiphi	15	85	-4.18	-1.02	-6.01	-0.0835	-0.0246	-0.0492
741	741	R_hypo_xiphi	15	86	-4.2	-1.08	-5.94	-0.0935	-0.00934	-0.0341
742	742	R_hypo_xiphi	15	87	-4.23	-1.13	-5.88	-0.094	0.00518	-0.0338
743	743	R_hypo_xiphi	15	88	-4.26	-1.19	-5.82	-0.0859	0.00104	-0.0512
744	744	R_hypo_xiphi	15	89	-4.28	-1.25	-5.76	-0.062	-0.0413	-0.0667
745	745	R_hypo_xiphi	15	90	-4.3	-1.3	-5.69	-0.066	-0.0547	-0.0516
746	746	R_hypo_xiphi	15	91	-4.31	-1.36	-5.62	-0.048	-0.0685	-0.0548
747	747	R_hypo_xiphi	15	92	-4.32	-1.41	-5.55	-0.0399	-0.07	-0.0592
748	748	R_hypo_xiphi	15	93	-4.33	-1.46	-5.48	-0.0368	-0.0752	-0.0546
749	749	R_hypo_xiphi	15	94	-4.34	-1.5	-5.4	-0.0379	-0.0798	-0.0468
750	750	R_hypo_xiphi	15	95	-4.35	-1.55	-5.33	-0.0303	-0.08	-0.0517
751	751	R_hypo_xiphi	15	96	-4.37	-1.59	-5.25	-0.0309	-0.0815	-0.049
752	752	R_hypo_xiphi	15	97	-4.39	-1.63	-5.18	-0.0376	-0.0787	-0.049
753	753	R_hypo_xiphi	15	98	-4.41	-1.66	-5.1	-0.0395	-0.0791	-0.0467
754	754	R_hypo_xiphi	15	99	-4.44	-1.7	-5.02	-0.0379	-0.0742	-0.0553
755	755	R_hypo_xiphi	15	100	-4.46	-1.72	-4.98	-0.038	-0.0769	-0.0515
756	756	R_hypo_xiphi	15	101	-4.49	-1.74	-4.93	-0.0384	-0.0776	-0.05
757	757	R_hypo_xiphi	15	102	-4.51	-1.75	-4.89	-0.0444	-0.0745	-0.0498
758	758	R_hypo_xiphi	15	103	-4.54	-1.76	-4.84	-0.0572	-0.065	-0.05
759	759	R_hypo_xiphi	15	104	-4.57	-1.77	-4.8	-0.0693	-0.0538	-0.0479
760	760	R_hypo_xiphi	15	105	-4.6	-1.76	-4.76	-0.0749	-0.0478	-0.0459
761	761	R_hypo_xiphi	15	106	-4.63	-1.76	-4.71	-0.086	-0.0325	-0.0393
762	762	R_hypo_xiphi	15	107	-4.65	-1.75	-4.66	-0.0948	-0.0101	-0.0301
763	763	R_hypo_xiphi	15	108	-4.67	-1.73	-4.61	-0.0884	0.0283	-0.0373
764	764	R_hypo_xiphi	15	109	-4.69	-1.72	-4.56	-0.0817	0.029	-0.0497
765	765	R_hypo_xiphi	15	110	-4.71	-1.7	-4.52	-0.0842	0.0311	-0.0442
766	766	R_hypo_xiphi	15	111	-4.73	-1.69	-4.47	-0.0753	0.0283	-0.0594
767	767	R_hypo_xiphi	15	112	-4.76	-1.67	-4.43	-0.0735	0.0231	-0.0638
768	768	R_hypo_xiphi	15	113	-4.79	-1.65	-4.39	-0.0662	0.0209	-0.072
769	769	R_hypo_xiphi	15	114	-4.82	-1.63	-4.36	-0.0602	0.00638	-0.0796
770	770	R_hypo_xiphi	15	115	-4.85	-1.6	-4.34	-0.0453	-0.00102	-0.0892
771	771	R_hypo_xiphi	15	116	-4.88	-1.58	-4.32	-0.0451	-0.00689	-0.089
772	772	R_hypo_xiphi	15	117	-4.92	-1.55	-4.31	-0.0417	-0.014	-0.0898
773	773	R_hypo_xiphi	15	118	-4.95	-1.51	-4.3	-0.0376	-0.0187	-0.0908
774	774	R_hypo_xiphi	15	119	-4.98	-1.48	-4.3	-0.0188	-0.0168	-0.0968
775	775	R_hypo_xiphi	15	120	-5	-1.45	-4.29	-0.0112	-0.00476	-0.0993
776	776	R_hypo_xiphi	15	121	-5.03	-1.41	-4.29	-0.00463	0.00394	-0.0998
777	777	R_hypo_xiphi	15	122	-5.06	-1.37	-4.29	-0.00116	0.000318	-0.1
778	778	R_hypo_xiphi	15	123	-5.09	-1.34	-4.29	0.0247	0.0134	-0.096
779	779	R_hypo_xiphi	15	124	-5.11	-1.3	-4.29	0.0125	0.0071	-0.099
780	780	R_hypo_xiphi	15	125	-5.14	-1.26	-4.3	0.0294	0.00867	-0.0952
781	781	R_hypo_xiphi	15	126	-5.17	-1.23	-4.3	0.0413	0.015	-0.0898
782	782	R_hypo_xiphi	15	127	-5.19	-1.19	-4.31	0.0429	0.00483	-0.0902
783	783	R_hypo_xiphi	15	128	-5.29	-1.06	-4.35	0.0428	-0.00438	-0.0903
784	784	R_hypo_xiphi	15	129	-5.39	-0.937	-4.41	0.0481	-0.0149	-0.0864
785	785	R_hypo_xiphi	15	130	-5.47	-0.811	-4.49	0.0512	-0.0192	-0.0837
786	786	R_hypo_xiphi	15	131	-5.54	-0.688	-4.58	0.0568	-0.0223	-0.0792
787	787	R_hypo_xiphi	15	132	-5.61	-0.567	-4.68	0.0631	-0.0244	-0.0737
788	788	R_hypo_xiphi	15	133	-5.68	-0.447	-4.77	0.0654	-0.0236	-0.0719
789	789	R_hypo_xiphi	15	134	-5.74	-0.328	-4.88	0.0679	-0.0223	-0.07
790	790	R_hypo_xiphi	15	135	-5.8	-0.209	-4.98	0.0742	-0.0205	-0.0639
791	791	R_hypo_xiphi	15	136	-5.86	-0.0912	-5.08	0.083	-0.00831	-0.0552
792	792	R_hypo_xiphi	15	137	-5.92	0.027	-5.19	0.0841	-0.00671	-0.0537
793	793	R_hypo_xiphi	15	138	-5.98	0.145	-5.29	0.0888	-0.00984	-0.0449
794	794	R_hypo_xiphi	15	139	-6	0.242	-5.43	0.0781	-0.0617	-0.01
795	795	R_hypo_xiphi	15	140	-5.99	0.3	-5.59	0.0576	-0.0761	-0.0299
796	796	L_hypo_xiphi	16	2	5.3	-0.0746	-5.7	-0.0831	-0.0555	-0.00339
797	797	L_hypo_xiphi	16	3	5.3	-0.144	-5.59	-0.0869	-0.0176	-0.0462
798	798	L_hypo_xiphi	16	4	5.26	-0.238	-5.52	-0.0816	0.000544	-0.0578
799	799	L_hypo_xiphi	16	5	5.21	-0.334	-5.44	-0.0821	-0.00857	-0.0565
800	800	L_hypo_xiphi	16	6	5.17	-0.426	-5.36	-0.0831	-0.0135	-0.0539
801	801	L_hypo_xiphi	16	7	5.13	-0.517	-5.28	-0.082	-0.0191	-0.054
802	802	L_hypo_xiphi	16	8	5.09	-0.61	-5.2	-0.0759	-0.0155	-0.0633
803	803	L_hypo_xiphi	16	9	5.04	-0.705	-5.13	-0.0691	-0.0183	-0.0699
804	804	L_hypo_xiphi	16	10	5	-0.801	-5.06	-0.0667	-0.0172	-0.0725
805	805	L_hypo_xiphi	16	11	4.95	-0.895	-4.98	-0.0543	-0.0327	-0.0773
806	806	L_hypo_xiphi	16	12	4.9	-0.991	-4.91	-0.0584	-0.0284	-0.0761
807	807	L_hypo_xiphi	16	13	4.85	-1.09	-4.84	-0.0576	-0.0176	-0.0798
808	808	L_hypo_xiphi	16	14	4.79	-1.18	-4.78	-0.0501	-0.0207	-0.084
809	809	L_hypo_xiphi	16	15	4.73	-1.28	-4.72	-0.0349	-0.0269	-0.0898
810	810	L_hypo_xiphi	16	16	4.69	-1.34	-4.7	-0.0354	-0.0197	-0.0914
811	811	L_hypo_xiphi	16	17	4.66	-1.39	-4.67	-0.0276	-0.0343	-0.0898
812	812	L_hypo_xiphi	16	18	4.62	-1.45	-4.65	-0.0227	-0.00221	-0.0974
813	813	L_hypo_xiphi	16	19	4.58	-1.5	-4.64	-0.00681	-0.0295	-0.0953
814	814	L_hypo_xiphi	16	20	4.54	-1.56	-4.61	-0.013	-0.0302	-0.0945
815	815	L_hypo_xiphi	16	21	4.5	-1.61	-4.59	-0.00559	-0.0324	-0.0945
816	816	L_hypo_xiphi	16	22	4.46	-1.66	-4.57	-0.0128	-0.0446	-0.0886
817	817	L_hypo_xiphi	16	23	4.42	-1.71	-4.55	0.00113	-0.0237	-0.0972
818	818	L_hypo_xiphi	16	24	4.37	-1.76	-4.54	0.00466	-0.0235	-0.0971
819	819	L_hypo_xiphi	16	25	4.32	-1.81	-4.53	-0.0054	-0.00937	-0.0994
820	820	L_hypo_xiphi	16	26	4.26	-1.85	-4.53	0.00696	-0.0153	-0.0986
821	821	L_hypo_xiphi	16	27	4.21	-1.89	-4.53	0.0252	-0.000141	-0.0968
822	822	L_hypo_xiphi	16	28	4.15	-1.93	-4.55	0.0265	-0.000934	-0.0964
823	823	L_hypo_xiphi	16	29	4.09	-1.96	-4.58	0.0552	-0.0104	-0.0827
824	824	L_hypo_xiphi	16	30	4.03	-1.98	-4.62	0.0686	0.00129	-0.0727
825	825	L_hypo_xiphi	16	31	3.99	-1.99	-4.68	0.0746	0.0255	-0.0616
826	826	L_hypo_xiphi	16	32	3.94	-1.99	-4.74	0.0759	0.0356	-0.0546
827	827	L_hypo_xiphi	16	33	3.9	-1.99	-4.81	0.0865	0.035	-0.0358
828	828	L_hypo_xiphi	16	34	3.88	-1.99	-4.88	0.0914	0.0154	-0.0375
829	829	L_hypo_xiphi	16	35	3.84	-1.97	-4.94	0.0827	0.048	-0.0292
830	830	L_hypo_xiphi	16	36	3.82	-1.96	-5.01	0.0966	-0.0023	-0.0258
831	831	L_hypo_xiphi	16	37	3.79	-1.93	-5.08	0.0903	0.00689	-0.0425
832	832	L_hypo_xiphi	16	38	3.76	-1.91	-5.14	0.0903	0.0142	-0.0406
833	833	L_hypo_xiphi	16	39	3.73	-1.88	-5.21	0.0821	-0.0316	-0.0476
834	834	L_hypo_xiphi	16	40	3.7	-1.86	-5.27	0.0742	-0.0423	-0.0521
835	835	L_hypo_xiphi	16	41	3.67	-1.83	-5.33	0.0798	-0.0286	-0.053
836	836	L_hypo_xiphi	16	42	3.65	-1.8	-5.4	0.0637	-0.0653	-0.0411
837	837	L_hypo_xiphi	16	43	3.62	-1.77	-5.46	0.0531	-0.0728	-0.0434
838	838	L_hypo_xiphi	16	44	3.57	-1.73	-5.57	0.0399	-0.0728	-0.0557
839	839	L_hypo_xiphi	16	45	3.52	-1.69	-5.67	0.0415	-0.0747	-0.052
840	840	L_hypo_xiphi	16	46	3.47	-1.64	-5.77	0.0418	-0.0637	-0.0648
841	841	L_hypo_xiphi	16	47	3.43	-1.59	-5.87	0.0628	-0.0511	-0.0587
842	842	L_hypo_xiphi	16	48	3.39	-1.54	-5.97	0.0746	-0.054	-0.0389
843	843	L_hypo_xiphi	16	49	3.35	-1.48	-6.07	0.0531	-0.0501	-0.0683
844	844	L_hypo_xiphi	16	50	3.31	-1.43	-6.17	0.0727	-0.0357	-0.0586
845	845	L_hypo_xiphi	16	51	3.27	-1.38	-6.27	0.0939	-0.0192	-0.0287
846	846	L_hypo_xiphi	16	52	3.23	-1.32	-6.38	0.0613	-0.0599	-0.0515
847	847	L_hypo_xiphi	16	53	3.2	-1.29	-6.49	0.0683	-0.0583	-0.044
848	848	L_hypo_xiphi	16	54	3.17	-1.25	-6.6	0.0593	-0.0704	-0.0391
849	849	L_hypo_xiphi	16	55	3.14	-1.21	-6.71	0.0557	-0.0666	-0.0497
850	850	L_hypo_xiphi	16	56	3.1	-1.17	-6.82	0.055	-0.0686	-0.0476
851	851	L_hypo_xiphi	16	57	3.06	-1.14	-6.92	0.0431	-0.0843	-0.0323
852	852	L_hypo_xiphi	16	58	3.02	-1.1	-7.04	0.0416	-0.0723	-0.0551
853	853	L_hypo_xiphi	16	59	2.97	-1.05	-7.14	0.0481	-0.0689	-0.0541
854	854	L_hypo_xiphi	16	60	2.92	-1.01	-7.25	0.0467	-0.0704	-0.0536
855	855	L_hypo_xiphi	16	61	2.88	-0.958	-7.35	0.0575	-0.0664	-0.0478
856	856	L_hypo_xiphi	16	62	2.82	-0.903	-7.45	0.0321	-0.0654	-0.0685
857	857	L_hypo_xiphi	16	63	2.76	-0.834	-7.54	0.0681	-0.0455	-0.0573
858	858	L_hypo_xiphi	16	64	2.71	-0.784	-7.64	0.0585	-0.0611	-0.0534
859	859	L_hypo_xiphi	16	65	2.66	-0.733	-7.74	0.0403	-0.0686	-0.0606
860	860	L_hypo_xiphi	16	66	2.6	-0.678	-7.83	0.0288	-0.071	-0.0643
861	861	L_hypo_xiphi	16	67	2.54	-0.623	-7.93	0.034	-0.0724	-0.0599
862	862	L_hypo_xiphi	16	68	2.49	-0.566	-8.03	0.0242	-0.0694	-0.0678
863	863	L_hypo_xiphi	16	69	2.42	-0.505	-8.12	0.0277	-0.0698	-0.066
864	864	L_hypo_xiphi	16	70	2.36	-0.446	-8.21	0.0332	-0.0624	-0.0707
865	865	L_hypo_xiphi	16	71	2.3	-0.382	-8.29	0.0234	-0.0658	-0.0716
866	866	L_hypo_xiphi	16	72	2.24	-0.319	-8.38	0.0307	-0.0714	-0.0629
867	867	L_hypo_xiphi	16	73	2.18	-0.257	-8.46	0.0251	-0.0502	-0.0827
868	868	L_hypo_xiphi	16	74	2.13	-0.168	-8.52	0.0773	0.0289	-0.0564
869	869	L_hypo_xiphi	16	75	2.05	-0.0835	-8.48	0.05	0.0857	-0.0122
870	870	L_hypo_xiphi	16	76	1.97	-0.0881	-8.39	0.0138	0.0882	0.0452
871	871	L_hypo_xiphi	16	77	1.92	-0.00148	-8.33	0.0531	-0.0115	-0.084
872	872	L_hypo_xiphi	16	78	1.89	0.0883	-8.4	0.0694	-0.0443	-0.0568
873	873	L_hypo_xiphi	16	79	1.83	0.163	-8.48	0.0682	-0.00411	-0.073
874	874	L_hypo_xiphi	16	80	1.77	0.243	-8.54	0.0665	-0.0114	-0.0738
875	875	L_hypo_xiphi	16	81	1.71	0.325	-8.6	0.0688	-0.000354	-0.0725
876	876	L_hypo_xiphi	16	82	1.64	0.408	-8.66	0.0701	0.0017	-0.0713
877	877	L_hypo_xiphi	16	83	1.57	0.49	-8.72	0.068	0.0126	-0.0722
878	878	L_hypo_xiphi	16	84	1.5	0.567	-8.77	0.0625	0.0211	-0.0751
879	879	L_hypo_xiphi	16	85	1.41	0.633	-8.82	0.0555	0.0278	-0.0784
880	880	L_hypo_xiphi	16	86	1.34	0.671	-8.85	0.0553	0.0236	-0.0799
881	881	L_hypo_xiphi	16	87	1.27	0.701	-8.89	0.0451	0.0305	-0.0838
882	882	L_hypo_xiphi	16	88	1.2	0.722	-8.92	0.0423	0.0248	-0.0872
883	883	L_hypo_xiphi	16	89	1.13	0.737	-8.95	0.0449	0.0235	-0.0862
884	884	L_hypo_xiphi	16	90	1.05	0.746	-8.98	0.04	0.0166	-0.0901
885	885	L_hypo_xiphi	16	91	0.976	0.748	-9.02	0.0414	0.0147	-0.0899
886	886	L_hypo_xiphi	16	92	0.901	0.747	-9.05	0.0388	0.0166	-0.0907
887	887	L_hypo_xiphi	16	93	0.825	0.742	-9.08	0.0294	0.0339	-0.0894
888	888	L_hypo_xiphi	16	94	0.748	0.736	-9.11	0.0341	0.0566	-0.0751
889	889	L_hypo_xiphi	16	95	0.673	0.734	-9.14	0.0371	0.0671	-0.0642
890	890	L_hypo_xiphi	16	96	0.639	0.767	-9.21	0.0995	0.00608	0.00848
891	891	L_hypo_xiphi	16	97	0.648	0.82	-9.27	0.0943	0.0272	0.0192
892	892	L_hypo_xiphi	16	98	0.592	0.849	-9.33	0.00495	0.0666	-0.0744
893	893	L_hypo_xiphi	16	99	0.51	0.849	-9.34	0.0118	0.0564	-0.0817
894	894	L_hypo_xiphi	16	100	0.408	0.835	-9.33	-0.0401	0.0417	-0.0816
895	895	L_hypo_xiphi	16	101	0.316	0.807	-9.29	-0.0361	-0.0036	-0.0932
896	896	L_hypo_xiphi	16	102	0.228	0.779	-9.24	-0.0376	-0.039	-0.084
897	897	L_hypo_xiphi	16	103	0.128	0.753	-9.22	-0.0184	-0.051	-0.0841
898	898	L_hypo_xiphi	16	104	0.068	0.728	-9.14	-0.0398	-0.0599	-0.0696
899	899	L_hypo_xiphi	16	105	-0.000518	0.7	-9.07	-0.0512	-0.0745	-0.0428
900	900	L_hypo_xiphi	16	106	-0.0746	0.676	-9	-0.0439	-0.0436	-0.0786
901	901	L_hypo_xiphi	16	107	-0.155	0.647	-8.94	-0.0439	-0.0381	-0.0814
902	902	L_hypo_xiphi	16	108	-0.235	0.613	-8.88	-0.048	-0.0356	-0.0802
903	903	L_hypo_xiphi	16	109	-0.306	0.584	-8.81	-0.0601	-0.0393	-0.0696
904	904	L_hypo_xiphi	16	110	-0.381	0.538	-8.76	-0.0499	-0.0181	-0.0848
905	905	L_hypo_xiphi	16	111	-0.452	0.489	-8.7	-0.0443	-0.0611	-0.0656
906	906	L_hypo_xiphi	16	112	-0.518	0.436	-8.64	0.00992	-0.0245	-0.0964
907	907	L_hyo_hypo	17	2	5.54	-3.38	6.06	-0.0244	-0.088	0.0408
908	908	L_hyo_hypo	17	3	5.62	-3.43	6	-0.0183	-0.0865	0.0467
909	909	L_hyo_hypo	17	4	5.71	-3.47	5.94	-0.0102	-0.0924	0.0369
910	910	L_hyo_hypo	17	5	5.79	-3.5	5.87	0.00187	-0.0906	0.0423
911	911	L_hyo_hypo	17	6	5.87	-3.52	5.8	0.0153	-0.0946	0.0285
912	912	L_hyo_hypo	17	7	5.96	-3.53	5.72	0.0184	-0.0913	0.0365
913	913	L_hyo_hypo	17	8	6.04	-3.53	5.65	0.0264	-0.0906	0.0331
914	914	L_hyo_hypo	17	9	6.11	-3.54	5.57	0.0303	-0.082	0.0485
915	915	L_hyo_hypo	17	10	6.18	-3.53	5.48	0.0361	-0.0888	0.0285
916	916	L_hyo_hypo	17	11	6.25	-3.53	5.39	0.0407	-0.0845	0.0347
917	917	L_hyo_hypo	17	12	6.32	-3.54	5.31	0.0297	-0.0899	0.0322
918	918	L_hyo_hypo	17	13	6.39	-3.55	5.21	0.0319	-0.0903	0.0287
919	919	L_hyo_hypo	17	14	6.45	-3.56	5.12	0.0363	-0.0866	0.0344
920	920	L_hyo_hypo	17	15	6.5	-3.55	5.02	0.0405	-0.0903	0.0143
921	921	L_hyo_hypo	17	16	6.55	-3.56	4.93	0.0379	-0.0901	0.0211
922	922	L_hyo_hypo	17	17	6.6	-3.57	4.84	0.0166	-0.0968	0.0186
923	923	L_hyo_hypo	17	18	6.64	-3.57	4.74	0.0372	-0.0928	0.000975
924	924	L_hyo_hypo	17	19	6.68	-3.58	4.64	0.0257	-0.0964	0.00722
925	925	L_hyo_hypo	17	20	6.71	-3.58	4.54	0.036	-0.0921	0.0145
926	926	L_hyo_hypo	17	21	6.74	-3.59	4.44	0.0232	-0.0954	0.0192
927	927	L_hyo_hypo	17	22	6.77	-3.59	4.34	0.0402	-0.0899	0.0175
928	928	L_hyo_hypo	17	23	6.8	-3.59	4.24	0.0498	-0.0861	0.0103
929	929	L_hyo_hypo	17	24	6.82	-3.59	4.14	0.0403	-0.0908	0.0114
930	930	L_hyo_hypo	17	25	6.85	-3.59	4.03	0.0469	-0.0881	0.00691
931	931	L_hyo_hypo	17	26	6.87	-3.59	3.93	0.0475	-0.0874	0.0102
932	932	L_hyo_hypo	17	27	6.89	-3.59	3.83	0.0455	-0.0886	0.0088
933	933	L_hyo_hypo	17	28	6.92	-3.59	3.73	0.0387	-0.0906	0.0173
934	934	L_hyo_hypo	17	29	6.94	-3.59	3.62	0.0463	-0.0886	-0.0018
935	935	L_hyo_hypo	17	30	6.96	-3.58	3.51	0.0335	-0.0942	0.00368
936	936	L_hyo_hypo	17	31	6.99	-3.57	3.4	0.0386	-0.0922	-0.0037
937	937	L_hyo_hypo	17	32	7.01	-3.54	3.29	0.0382	-0.091	-0.016
938	938	L_hyo_hypo	17	33	7.03	-3.52	3.18	0.0368	-0.0898	-0.0241
939	939	L_hyo_hypo	17	34	7.05	-3.49	3.07	0.00533	-0.0996	-0.00728
940	940	L_hyo_hypo	17	35	7.08	-3.5	2.97	-0.00298	-0.0998	0.00557
941	941	L_hyo_hypo	17	36	7.11	-3.51	2.86	0.00262	-0.099	0.0141
942	942	L_hyo_hypo	17	37	7.14	-3.51	2.75	0.0114	-0.0994	0.000321
943	943	L_hyo_hypo	17	38	7.16	-3.51	2.63	0.0198	-0.0978	-0.00601
944	944	L_hyo_hypo	17	39	7.18	-3.5	2.52	0.0188	-0.0981	-0.00556
945	945	L_hyo_hypo	17	40	7.19	-3.51	2.41	0.0369	-0.0925	0.00902
946	946	L_hyo_hypo	17	41	7.2	-3.49	2.3	0.0403	-0.0908	0.0112
947	947	L_hyo_hypo	17	42	7.21	-3.5	2.18	0.0271	-0.0956	0.011
948	948	L_hyo_hypo	17	43	7.21	-3.49	2.07	0.0126	-0.0982	-0.0144
949	949	L_hyo_hypo	17	44	7.21	-3.48	1.97	0.0159	-0.0983	-0.00926
950	950	L_hyo_hypo	17	45	7.2	-3.46	1.87	-0.00351	-0.0969	-0.0245
951	951	L_hyo_hypo	17	46	7.18	-3.43	1.78	-0.00518	-0.0897	-0.044
952	952	L_hyo_hypo	17	47	7.15	-3.39	1.69	-0.0184	-0.0967	-0.0179
953	953	L_hyo_hypo	17	48	7.12	-3.38	1.6	0.0204	-0.0963	-0.0177
954	954	L_hyo_hypo	17	49	7.09	-3.34	1.51	0.0527	-0.08	-0.0287
955	955	L_hyo_hypo	17	50	7.07	-3.35	1.41	0.088	-0.0472	-0.00512
956	956	L_hyo_hypo	17	51	7.05	-3.37	1.31	0.0918	-0.0367	-0.015
957	957	L_hyo_hypo	17	52	7.03	-3.37	1.22	0.0722	-0.0612	-0.0322
958	958	L_hyo_hypo	17	53	7	-3.36	1.12	0.0556	-0.0798	-0.0234
959	959	L_hyo_hypo	17	54	6.98	-3.34	1.02	0.067	-0.0698	-0.0253
960	960	L_hyo_hypo	17	55	6.96	-3.33	0.926	0.0365	-0.0801	-0.0475
961	961	L_hyo_hypo	17	56	6.93	-3.3	0.833	0.0549	-0.0774	-0.0316
962	962	L_hyo_hypo	17	57	6.91	-3.27	0.739	0.0522	-0.0816	-0.0248
963	963	L_hyo_hypo	17	58	6.9	-3.24	0.632	0.0387	-0.0843	-0.0374
964	964	L_hyo_hypo	17	59	6.89	-3.21	0.525	0.0494	-0.081	-0.0317
965	965	L_hyo_hypo	17	60	6.87	-3.19	0.417	0.0467	-0.0856	-0.0223
966	966	L_hyo_hypo	17	61	6.86	-3.16	0.311	0.0598	-0.0762	-0.025
967	967	L_hyo_hypo	17	62	6.86	-3.13	0.203	0.0503	-0.0816	-0.0284
968	968	L_hyo_hypo	17	63	6.84	-3.1	0.0975	0.0501	-0.0802	-0.0326
969	969	L_hyo_hypo	17	64	6.83	-3.06	-0.00555	0.0453	-0.0784	-0.0424
970	970	L_hyo_hypo	17	65	6.81	-3.01	-0.106	0.0394	-0.0879	-0.0269
971	971	L_hyo_hypo	17	66	6.82	-2.99	-0.215	0.046	-0.088	-0.0116
972	972	L_hyo_hypo	17	67	6.82	-2.97	-0.324	0.0418	-0.0898	-0.0138
973	973	L_hyo_hypo	17	68	6.84	-2.96	-0.434	0.0524	-0.0852	-0.00137
974	974	L_hyo_hypo	17	69	6.85	-2.94	-0.543	0.0679	-0.073	-0.00718
975	975	L_hyo_hypo	17	70	6.86	-2.92	-0.651	0.0694	-0.0716	-0.00673
976	976	L_hyo_hypo	17	71	6.87	-2.89	-0.758	0.0645	-0.075	-0.0143
977	977	L_hyo_hypo	17	72	6.88	-2.86	-0.854	0.0581	-0.0809	-0.00932
978	978	L_hyo_hypo	17	73	6.89	-2.83	-0.946	0.0853	-0.0521	-0.00181
979	979	L_hyo_hypo	17	74	6.9	-2.79	-1.04	0.0831	-0.0541	-0.0128
980	980	L_hyo_hypo	17	75	6.92	-2.75	-1.13	0.0701	-0.069	-0.018
981	981	L_hyo_hypo	17	76	6.94	-2.71	-1.22	0.0452	-0.0887	-0.00936
982	982	L_hyo_hypo	17	77	6.96	-2.68	-1.31	0.0289	-0.0924	-0.0251
983	983	L_hyo_hypo	17	78	6.99	-2.65	-1.4	0.00682	-0.0976	-0.0205
984	984	L_hyo_hypo	17	79	7.01	-2.63	-1.49	0.0235	-0.0954	-0.0188
985	985	L_hyo_hypo	17	80	7.04	-2.6	-1.58	0.0117	-0.0966	-0.0231
986	986	L_hyo_hypo	17	81	7.07	-2.59	-1.68	-0.0192	-0.0981	0.00195
987	987	L_hyo_hypo	17	82	7.09	-2.59	-1.78	0.00464	-0.0964	-0.0261
988	988	L_hyo_hypo	17	83	7.1	-2.55	-1.87	-0.00233	-0.0926	-0.0377
989	989	L_hyo_hypo	17	84	7.11	-2.51	-1.96	-0.00138	-0.0946	-0.0323
990	990	L_hyo_hypo	17	85	7.11	-2.47	-2.05	0.00147	-0.0958	-0.0286
991	991	L_hyo_hypo	17	86	7.11	-2.43	-2.15	0.0118	-0.0699	-0.0706
992	992	L_hyo_hypo	17	87	7.11	-2.37	-2.24	0.0135	-0.0975	0.0179
993	993	L_hyo_hypo	17	88	7.1	-2.37	-2.34	-0.0185	-0.0978	0.00937
994	994	L_hyo_hypo	17	89	7.1	-2.34	-2.45	-0.0217	-0.0859	-0.0464
995	995	L_hyo_hypo	17	90	7.09	-2.31	-2.54	-0.0262	-0.0936	-0.0234
996	996	L_hyo_hypo	17	91	7.07	-2.27	-2.64	-0.021	-0.0937	-0.028
997	997	L_hyo_hypo	17	92	7.06	-2.23	-2.74	-0.00553	-0.0965	-0.0257
998	998	L_hyo_hypo	17	93	7.04	-2.19	-2.84	0.0268	-0.0894	-0.036
999	999	L_hyo_hypo	17	94	7.02	-2.16	-2.94	0.0259	-0.0916	-0.0306
1000	1000	L_hyo_hypo	17	95	7.01	-2.14	-3.04	0.0229	-0.0938	-0.0261
1001	1001	L_hyo_hypo	17	96	6.99	-2.11	-3.14	0.0143	-0.095	-0.0277
1002	1002	L_hyo_hypo	17	97	6.97	-2.08	-3.24	0.0187	-0.0914	-0.0361
1003	1003	L_hyo_hypo	17	98	6.95	-2.04	-3.34	0.0274	-0.0848	-0.0454
1004	1004	L_hyo_hypo	17	99	6.93	-1.99	-3.43	0.0322	-0.0828	-0.046
1005	1005	L_hyo_hypo	17	100	6.91	-1.96	-3.52	0.0409	-0.0836	-0.0367
1006	1006	L_hyo_hypo	17	101	6.9	-1.93	-3.61	0.0331	-0.0805	-0.0492
1007	1007	L_hyo_hypo	17	102	6.88	-1.89	-3.69	0.0374	-0.0845	-0.0382
1008	1008	L_hyo_hypo	17	103	6.86	-1.86	-3.78	0.028	-0.0867	-0.0413
1009	1009	L_hyo_hypo	17	104	6.84	-1.82	-3.86	0.02	-0.0884	-0.0422
1010	1010	L_hyo_hypo	17	105	6.82	-1.78	-3.95	0.0239	-0.0849	-0.0472
1011	1011	L_hyo_hypo	17	106	6.8	-1.74	-4.03	0.0219	-0.0793	-0.0569
1012	1012	L_hyo_hypo	17	107	6.77	-1.7	-4.11	0.0158	-0.0857	-0.049
1013	1013	L_hyo_hypo	17	108	6.75	-1.65	-4.19	0.0259	-0.0816	-0.0516
1014	1014	L_hyo_hypo	17	109	6.72	-1.61	-4.27	0.0326	-0.0763	-0.0559
1015	1015	L_hyo_hypo	17	110	6.69	-1.56	-4.35	0.0198	-0.082	-0.0537
1016	1016	L_hyo_hypo	17	111	6.65	-1.52	-4.43	0.0188	-0.0752	-0.0632
1017	1017	L_hyo_hypo	17	112	6.62	-1.47	-4.5	0.0112	-0.0791	-0.0602
1018	1018	L_hyo_hypo	17	113	6.57	-1.43	-4.57	0.0225	-0.0791	-0.0569
1019	1019	L_hyo_hypo	17	114	6.5	-1.35	-4.7	0.0279	-0.0755	-0.0593
1020	1020	L_hyo_hypo	17	115	6.41	-1.28	-4.82	0.0265	-0.0734	-0.0625
1021	1021	L_hyo_hypo	17	116	6.32	-1.2	-4.94	0.0144	-0.0785	-0.0602
1022	1022	L_hyo_hypo	17	117	6.22	-1.13	-5.06	0.0128	-0.0864	-0.0487
1023	1023	L_hyo_hypo	17	118	6.12	-1.07	-5.18	0.00671	-0.0798	-0.0599
1024	1024	L_hyo_hypo	17	119	6.01	-0.989	-5.28	-0.0069	-0.0739	-0.067
1025	1025	L_hyo_hypo	17	120	5.9	-0.897	-5.37	-0.00387	-0.0717	-0.0696
1026	1026	L_hyo_hypo	17	121	5.79	-0.802	-5.45	-0.0119	-0.0715	-0.0689
1027	1027	L_hyo_hypo	17	122	5.68	-0.703	-5.53	-0.0213	-0.0703	-0.0679
1028	1028	L_hyo_hypo	17	123	5.58	-0.583	-5.59	-0.0351	-0.0484	-0.0802
1029	1029	L_hyo_hypo	17	124	5.52	-0.433	-5.63	-0.0652	-0.0415	-0.0635
1030	1030	L_hyo_hypo	17	125	5.45	-0.288	-5.68	-0.069	-0.0583	-0.0429
1031	1031	L_hyo_hypo	17	126	5.37	-0.158	-5.75	-0.0708	-0.0624	-0.0331
1032	1032	L_epi_hyo	18	2	-0.126	-5.78	9.68	0.0111	-0.0688	0.0717
1033	1033	L_epi_hyo	18	3	-0.0396	-5.79	9.68	-0.0111	-0.0745	0.0658
1034	1034	L_epi_hyo	18	4	0.0468	-5.79	9.67	0.0156	-0.08	0.0579
1035	1035	L_epi_hyo	18	5	0.132	-5.79	9.66	0.00839	-0.0803	0.059
1036	1036	L_epi_hyo	18	6	0.218	-5.79	9.64	0.0165	-0.0824	0.0542
1037	1037	L_epi_hyo	18	7	0.302	-5.78	9.63	0.0259	-0.0779	0.0571
1038	1038	L_epi_hyo	18	8	0.386	-5.77	9.6	0.0288	-0.0785	0.0548
1039	1039	L_epi_hyo	18	9	0.468	-5.76	9.58	0.0324	-0.0781	0.0533
1040	1040	L_epi_hyo	18	10	0.549	-5.74	9.55	0.0393	-0.0747	0.0536
1041	1041	L_epi_hyo	18	11	0.628	-5.72	9.52	0.0438	-0.0683	0.0585
1042	1042	L_epi_hyo	18	12	0.707	-5.7	9.49	0.0365	-0.0733	0.0574
1043	1043	L_epi_hyo	18	13	0.787	-5.68	9.47	0.0375	-0.0756	0.0537
1044	1044	L_epi_hyo	18	14	0.866	-5.66	9.44	0.039	-0.0768	0.0509
1045	1045	L_epi_hyo	18	15	0.945	-5.64	9.41	0.0422	-0.077	0.0478
1046	1046	L_epi_hyo	18	16	1.02	-5.61	9.38	0.0447	-0.0758	0.0475
1047	1047	L_epi_hyo	18	17	1.1	-5.58	9.34	0.0545	-0.0725	0.042
1048	1048	L_epi_hyo	18	18	1.16	-5.56	9.32	0.0419	-0.079	0.0448
1049	1049	L_epi_hyo	18	19	1.22	-5.54	9.29	0.0519	-0.0739	0.0429
1050	1050	L_epi_hyo	18	20	1.28	-5.51	9.26	0.0503	-0.0719	0.048
1051	1051	L_epi_hyo	18	21	1.34	-5.49	9.24	0.0419	-0.0738	0.053
1052	1052	L_epi_hyo	18	22	1.4	-5.46	9.22	0.0519	-0.0713	0.0472
1053	1053	L_epi_hyo	18	23	1.47	-5.44	9.19	0.0418	-0.0824	0.0383
1054	1054	L_epi_hyo	18	24	1.53	-5.42	9.17	0.0534	-0.075	0.0391
1055	1055	L_epi_hyo	18	25	1.59	-5.39	9.14	0.0492	-0.07	0.0518
1056	1056	L_epi_hyo	18	26	1.65	-5.37	9.12	0.0531	-0.0627	0.057
1057	1057	L_epi_hyo	18	27	1.71	-5.34	9.09	0.0492	-0.0714	0.0499
1058	1058	L_epi_hyo	18	28	1.77	-5.32	9.06	0.0488	-0.0716	0.05
1059	1059	L_epi_hyo	18	29	1.83	-5.3	9.03	0.0467	-0.0678	0.0569
1060	1060	L_epi_hyo	18	30	1.89	-5.28	9	0.0547	-0.0736	0.0399
1061	1061	L_epi_hyo	18	31	1.95	-5.26	8.97	0.0502	-0.0665	0.0553
1062	1062	L_epi_hyo	18	32	2.01	-5.24	8.93	0.054	-0.0713	0.0447
1063	1063	L_epi_hyo	18	33	2.06	-5.22	8.89	0.0593	-0.0583	0.0555
1064	1064	L_epi_hyo	18	34	2.12	-5.2	8.85	0.0629	-0.0597	0.0498
1065	1065	L_epi_hyo	18	35	2.17	-5.18	8.81	0.0699	-0.0478	0.0531
1066	1066	L_epi_hyo	18	36	2.22	-5.16	8.76	0.0728	-0.0436	0.0529
1067	1067	L_epi_hyo	18	37	2.27	-5.14	8.71	0.0636	-0.0547	0.0544
1068	1068	L_epi_hyo	18	38	2.32	-5.12	8.66	0.0717	-0.0374	0.0588
1069	1069	L_epi_hyo	18	39	2.37	-5.11	8.62	0.0677	-0.043	0.0597
1070	1070	L_epi_hyo	18	40	2.42	-5.09	8.57	0.0712	-0.0416	0.0566
1071	1071	L_epi_hyo	18	41	2.46	-5.08	8.52	0.0695	-0.0445	0.0565
1072	1072	L_epi_hyo	18	42	2.51	-5.07	8.47	0.0727	-0.0418	0.0545
1073	1073	L_epi_hyo	18	43	2.56	-5.05	8.42	0.0748	-0.0477	0.0462
1074	1074	L_epi_hyo	18	44	2.61	-5.04	8.36	0.0686	-0.0535	0.0494
1075	1075	L_epi_hyo	18	45	2.65	-5.03	8.31	0.0753	-0.0418	0.0508
1076	1076	L_epi_hyo	18	46	2.69	-5.02	8.25	0.0564	-0.0599	0.0568
1077	1077	L_epi_hyo	18	47	2.74	-5.02	8.2	0.0702	-0.0536	0.0469
1078	1078	L_epi_hyo	18	48	2.78	-5.01	8.14	0.0693	-0.0603	0.0395
1079	1079	L_epi_hyo	18	49	2.82	-5	8.08	0.0776	-0.0534	0.0337
1080	1080	L_epi_hyo	18	50	2.87	-5	8.01	0.0653	-0.0573	0.0495
1081	1081	L_epi_hyo	18	51	2.92	-4.99	7.93	0.0684	-0.0621	0.0383
1082	1082	L_epi_hyo	18	52	2.96	-4.99	7.85	0.0652	-0.064	0.0406
1083	1083	L_epi_hyo	18	53	3.01	-4.99	7.78	0.0634	-0.0675	0.0379
1084	1084	L_epi_hyo	18	54	3.06	-4.99	7.7	0.0652	-0.0677	0.0343
1085	1085	L_epi_hyo	18	55	3.11	-4.99	7.62	0.0586	-0.0717	0.0378
1086	1086	L_epi_hyo	18	56	3.15	-4.99	7.54	0.0609	-0.0744	0.0274
1087	1087	L_epi_hyo	18	57	3.19	-4.99	7.45	0.0585	-0.0754	0.0299
1088	1088	L_epi_hyo	18	58	3.23	-4.99	7.37	0.0476	-0.0814	0.0332
1089	1089	L_epi_hyo	18	59	3.27	-4.99	7.29	0.0527	-0.0812	0.025
1090	1090	L_epi_hyo	18	60	3.31	-5	7.21	0.0593	-0.0723	0.0353
1091	1091	L_epi_hyo	18	61	3.35	-5	7.12	0.064	-0.0698	0.0321
1092	1092	L_epi_hyo	18	62	3.38	-5	7.04	0.0665	-0.0706	0.0242
1093	1093	L_epi_hyo	18	63	3.41	-4.99	6.95	0.0524	-0.0851	-0.004
1094	1094	L_epi_hyo	18	64	3.43	-4.99	6.86	0.0655	-0.0724	0.0217
1095	1095	L_epi_hyo	18	65	3.47	-4.99	6.78	0.0633	-0.0615	0.047
1096	1096	L_epi_hyo	18	66	3.52	-5.01	6.69	0.0676	-0.0552	0.0488
1097	1097	L_epi_hyo	18	67	3.56	-5.01	6.6	0.0611	-0.0698	0.0373
1098	1098	L_epi_hyo	18	68	3.59	-5.02	6.51	0.066	-0.0718	0.0219
1099	1099	L_epi_hyo	18	69	3.62	-5.02	6.41	0.0763	-0.0594	0.0254
1100	1100	L_epi_hyo	18	70	3.66	-5.02	6.32	0.078	-0.0503	0.0371
1101	1101	L_epi_hyo	18	71	3.69	-5.04	6.23	0.0896	-0.0303	0.0324
1102	1102	L_epi_hyo	18	72	3.73	-5.05	6.13	0.0849	-0.043	0.0306
1103	1103	L_epi_hyo	18	73	3.76	-5.05	6.04	0.0817	-0.0467	0.0338
1104	1104	L_epi_hyo	18	74	3.81	-5.08	5.95	0.0748	-0.0448	0.049
1105	1105	L_epi_hyo	18	75	3.85	-5.1	5.87	0.0442	-0.0844	0.0303
1106	1106	L_epi_hyo	18	76	3.89	-5.11	5.77	0.0524	-0.0711	0.0468
1107	1107	L_epi_hyo	18	77	3.93	-5.12	5.68	0.0707	-0.0669	0.0226
1108	1108	L_epi_hyo	18	78	3.96	-5.12	5.59	0.0555	-0.082	0.0141
1109	1109	L_epi_hyo	18	79	4	-5.12	5.49	0.0573	-0.0773	0.0273
1110	1110	L_epi_hyo	18	80	4.03	-5.12	5.4	0.0507	-0.0854	0.0114
1111	1111	L_epi_hyo	18	81	4.07	-5.11	5.31	0.0514	-0.083	0.0217
1112	1112	L_epi_hyo	18	82	4.09	-5.11	5.26	0.0526	-0.084	0.0135
1113	1113	L_epi_hyo	18	83	4.11	-5.1	5.2	0.0633	-0.0761	0.0141
1114	1114	L_epi_hyo	18	84	4.13	-5.09	5.15	0.0735	-0.0672	0.00908
1115	1115	L_epi_hyo	18	85	4.15	-5.08	5.1	0.0649	-0.0707	0.0282
1116	1116	L_epi_hyo	18	86	4.18	-5.08	5.05	0.0649	-0.0738	0.0183
1117	1117	L_epi_hyo	18	87	4.2	-5.07	5	0.0669	-0.0731	0.0132
1118	1118	L_epi_hyo	18	88	4.22	-5.06	4.96	0.0615	-0.076	0.0212
1119	1119	L_epi_hyo	18	89	4.25	-5.05	4.91	0.063	-0.076	0.016
1120	1120	L_epi_hyo	18	90	4.27	-5.03	4.86	0.0823	-0.0519	0.0233
1121	1121	L_epi_hyo	18	91	4.29	-5.01	4.81	0.0724	-0.0668	0.0173
1122	1122	L_epi_hyo	18	92	4.32	-5	4.77	0.0851	-0.0476	0.0221
1123	1123	L_epi_hyo	18	93	4.35	-4.97	4.73	0.0843	-0.0127	0.0523
1124	1124	L_epi_hyo	18	94	4.38	-4.95	4.69	0.0837	-0.0168	0.0521
1125	1125	L_epi_hyo	18	95	4.4	-4.92	4.65	0.0855	-0.00284	0.0518
1126	1126	L_epi_hyo	18	96	4.43	-4.89	4.61	0.086	-0.00397	0.0508
1127	1127	L_epi_hyo	18	97	4.46	-4.86	4.57	0.0694	-0.00352	0.0719
1128	1128	L_epi_hyo	18	98	4.48	-4.83	4.54	0.0766	0.0116	0.0632
1129	1129	L_epi_hyo	18	99	4.5	-4.79	4.51	0.0655	0.041	0.0635
1130	1130	L_epi_hyo	18	100	4.52	-4.75	4.48	0.0457	0.0302	0.0837
1131	1131	L_epi_hyo	18	101	4.54	-4.71	4.45	0.0352	0.0273	0.0895
1132	1132	L_epi_hyo	18	102	4.57	-4.67	4.43	0.0335	0.0179	0.0925
1133	1133	L_epi_hyo	18	103	4.59	-4.63	4.42	0.0375	0.0192	0.0907
1134	1134	L_epi_hyo	18	104	4.61	-4.58	4.4	0.0303	0.00879	0.0949
1135	1135	L_epi_hyo	18	105	4.63	-4.54	4.39	0.0282	0.00537	0.0958
1136	1136	L_epi_hyo	18	106	4.66	-4.49	4.38	0.0262	0.0236	0.0936
1137	1137	L_epi_hyo	18	107	4.68	-4.45	4.36	0.0268	0.0157	0.0951
1138	1138	L_epi_hyo	18	108	4.7	-4.4	4.36	0.000747	-0.00352	0.0999
1139	1139	L_epi_hyo	18	109	4.73	-4.36	4.36	-0.00667	-0.014	0.0988
1140	1140	L_epi_hyo	18	110	4.76	-4.31	4.37	0.00786	-0.019	0.0979
1141	1141	L_epi_hyo	18	111	4.78	-4.27	4.38	0.0145	-0.0228	0.0963
1142	1142	L_epi_hyo	18	112	4.81	-4.23	4.39	0.0101	-0.0503	0.0859
1143	1143	L_epi_hyo	18	113	4.84	-4.19	4.41	0.00292	-0.0407	0.0913
1144	1144	L_epi_hyo	18	114	4.87	-4.16	4.43	-0.012	-0.0584	0.0803
1145	1145	L_epi_hyo	18	115	4.9	-4.13	4.45	-0.0209	-0.0559	0.0802
1146	1146	L_epi_hyo	18	116	4.92	-4.11	4.48	-0.0186	-0.069	0.0699
1147	1147	L_epi_hyo	18	117	4.95	-4.09	4.51	-0.0246	-0.0725	0.0643
1148	1148	L_epi_hyo	18	118	4.98	-4.07	4.54	-0.0122	-0.0712	0.0691
1149	1149	L_epi_hyo	18	119	5.01	-4.05	4.57	-0.0288	-0.0724	0.0627
1150	1150	L_epi_hyo	18	120	5.03	-4.03	4.61	-0.0377	-0.0774	0.051
1151	1151	L_epi_hyo	18	121	5.06	-4.01	4.64	-0.0173	-0.0726	0.0666
1152	1152	L_epi_hyo	18	122	5.09	-3.99	4.67	-0.00699	-0.0794	0.0604
1153	1153	L_epi_hyo	18	123	5.11	-3.97	4.7	-0.00462	-0.0837	0.0546
1154	1154	L_epi_hyo	18	124	5.13	-3.95	4.73	0.00505	-0.0764	0.0643
1155	1155	L_epi_hyo	18	125	5.16	-3.92	4.76	0.00337	-0.0764	0.0645
1156	1156	L_epi_hyo	18	126	5.18	-3.89	4.79	0.0148	-0.0796	0.0587
1157	1157	L_epi_hyo	18	127	5.2	-3.87	4.83	0.00198	-0.0872	0.0489
1158	1158	L_epi_hyo	18	128	5.21	-3.85	4.86	0.000335	-0.0909	0.0416
1159	1159	L_epi_hyo	18	129	5.23	-3.83	4.9	-0.00867	-0.0893	0.0441
1160	1160	L_epi_hyo	18	130	5.25	-3.8	4.97	0.0101	-0.0853	0.0512
1161	1161	L_epi_hyo	18	131	5.28	-3.76	5.05	-0.00516	-0.0927	0.0372
1162	1162	L_epi_hyo	18	132	5.3	-3.73	5.12	-0.0122	-0.088	0.046
1163	1163	L_epi_hyo	18	133	5.32	-3.7	5.2	-0.0207	-0.0895	0.0395
1164	1164	L_epi_hyo	18	134	5.33	-3.67	5.27	-0.0267	-0.087	0.0415
1165	1165	L_epi_hyo	18	135	5.35	-3.64	5.35	-0.039	-0.0863	0.032
1166	1166	L_epi_hyo	18	136	5.36	-3.62	5.43	-0.023	-0.0885	0.0404
1167	1167	L_epi_hyo	18	137	5.38	-3.58	5.5	-0.0343	-0.0855	0.0389
1168	1168	L_epi_hyo	18	138	5.39	-3.55	5.58	-0.0352	-0.0847	0.0399
1169	1169	L_epi_hyo	18	139	5.4	-3.52	5.66	-0.023	-0.0902	0.0365
1170	1170	L_epi_hyo	18	140	5.41	-3.49	5.73	-0.03	-0.0857	0.0419
1171	1171	L_epi_hyo	18	141	5.42	-3.46	5.81	-0.0323	-0.0887	0.0329
1172	1172	L_epi_hyo	18	142	5.43	-3.43	5.89	-0.0253	-0.0874	0.0415
1173	1173	L_epi_hyo	18	143	5.44	-3.39	5.96	-0.031	-0.0827	0.047
1174	1174	L_epi_hyo	18	144	5.45	-3.36	6.04	-0.0382	-0.0815	0.0436
1175	1175	longueur_plastron	19	2	-0.195	-5.84	9.61	-0.00249	-0.0904	0.0427
1176	1176	longueur_plastron	19	3	-0.18	-5.87	9.51	0.00122	-0.0975	0.022
1177	1177	longueur_plastron	19	4	-0.168	-5.89	9.4	-0.00385	-0.0999	0.00376
1178	1178	longueur_plastron	19	5	-0.158	-5.89	9.3	-0.000962	-0.0998	0.00544
1179	1179	longueur_plastron	19	6	-0.15	-5.88	9.2	-0.0044	-0.0984	-0.0172
1180	1180	longueur_plastron	19	7	-0.143	-5.88	9.09	0.00253	-0.0999	0.00347
1181	1181	longueur_plastron	19	8	-0.138	-5.87	8.99	-0.00449	-0.0964	-0.0263
1182	1182	longueur_plastron	19	9	-0.134	-5.85	8.88	-0.00404	-0.0996	-0.00796
1183	1183	longueur_plastron	19	10	-0.13	-5.82	8.78	-0.00669	-0.0971	-0.023
1184	1184	longueur_plastron	19	11	-0.128	-5.81	8.68	-0.0228	-0.0964	-0.0138
1185	1185	longueur_plastron	19	12	-0.127	-5.78	8.58	-0.00554	-0.0875	-0.0481
1186	1186	longueur_plastron	19	13	-0.126	-5.76	8.47	-0.0194	-0.0974	-0.0119
1187	1187	longueur_plastron	19	14	-0.126	-5.73	8.37	-0.0125	-0.0905	-0.0407
1188	1188	longueur_plastron	19	15	-0.126	-5.71	8.27	-0.0156	-0.098	-0.0121
1189	1189	longueur_plastron	19	16	-0.124	-5.7	8.17	-0.00605	-0.0994	-0.00871
1190	1190	longueur_plastron	19	17	-0.124	-5.68	8.06	0.00379	-0.0993	-0.0113
1191	1191	longueur_plastron	19	18	-0.122	-5.67	7.96	-0.0113	-0.0983	-0.0142
1192	1192	longueur_plastron	19	19	-0.121	-5.65	7.86	0.00983	-0.0986	-0.0132
1193	1193	longueur_plastron	19	20	-0.117	-5.62	7.65	-0.0115	-0.0987	-0.0115
1194	1194	longueur_plastron	19	21	-0.113	-5.59	7.43	-0.00175	-0.0994	-0.0105
1195	1195	longueur_plastron	19	22	-0.11	-5.57	7.22	-0.00256	-0.0979	-0.0202
1196	1196	longueur_plastron	19	23	-0.107	-5.54	7.01	-0.00236	-0.0973	-0.0231
1197	1197	longueur_plastron	19	24	-0.106	-5.5	6.81	-0.00849	-0.0993	-0.00839
1198	1198	longueur_plastron	19	25	-0.103	-5.47	6.6	-0.00742	-0.0985	-0.0153
1199	1199	longueur_plastron	19	26	-0.101	-5.43	6.39	-0.00135	-0.0987	-0.0158
1200	1200	longueur_plastron	19	27	-0.0988	-5.41	6.18	-0.000369	-0.0994	-0.0105
1201	1201	longueur_plastron	19	28	-0.0968	-5.38	5.97	-0.00702	-0.0996	-0.00524
1202	1202	longueur_plastron	19	29	-0.0948	-5.36	5.75	-0.00483	-0.0994	-0.00998
1203	1203	longueur_plastron	19	30	-0.0931	-5.34	5.54	0.00221	-0.0992	-0.0124
1204	1204	longueur_plastron	19	31	-0.092	-5.32	5.33	-0.00271	-0.0999	-0.00202
1205	1205	longueur_plastron	19	32	-0.0915	-5.31	5.12	0.0018	-0.1	-0.00235
1206	1206	longueur_plastron	19	33	-0.0915	-5.3	4.91	-0.00359	-0.0996	-0.00836
1207	1207	longueur_plastron	19	34	-0.0919	-5.28	4.7	0.000494	-0.0995	-0.00972
1208	1208	longueur_plastron	19	35	-0.0913	-5.25	4.49	-0.000191	-0.0989	-0.0145
1209	1209	longueur_plastron	19	36	-0.092	-5.22	4.28	-0.00197	-0.0992	-0.0125
1210	1210	longueur_plastron	19	37	-0.0925	-5.2	4.07	-0.0102	-0.0993	-0.00603
1211	1211	longueur_plastron	19	38	-0.0943	-5.19	3.91	-0.00581	-0.0996	-0.00669
1212	1212	longueur_plastron	19	39	-0.0955	-5.17	3.76	-0.00613	-0.0997	-0.00377
1213	1213	longueur_plastron	19	40	-0.0977	-5.16	3.6	-0.0132	-0.0988	-0.00765
1214	1214	longueur_plastron	19	41	-0.0981	-5.14	3.45	-0.011	-0.098	-0.0163
1215	1215	longueur_plastron	19	42	-0.0999	-5.12	3.29	-0.00773	-0.0972	-0.0221
1216	1216	longueur_plastron	19	43	-0.101	-5.09	3.14	-0.013	-0.098	-0.0153
1217	1217	longueur_plastron	19	44	-0.102	-5.07	2.99	-0.0179	-0.0959	-0.0217
1218	1218	longueur_plastron	19	45	-0.102	-5.04	2.83	-0.0225	-0.0955	-0.0191
1219	1219	longueur_plastron	19	46	-0.103	-5.01	2.68	-0.0166	-0.0973	-0.0163
1220	1220	longueur_plastron	19	47	-0.104	-4.98	2.53	-0.0167	-0.0968	-0.0185
1221	1221	longueur_plastron	19	48	-0.105	-4.94	2.37	-0.0175	-0.0971	-0.0161
1222	1222	longueur_plastron	19	49	-0.107	-4.91	2.22	-0.00856	-0.0982	-0.0169
1223	1223	longueur_plastron	19	50	-0.109	-4.88	2.07	-0.0133	-0.0985	-0.0111
1224	1224	longueur_plastron	19	51	-0.114	-4.86	1.92	-0.000256	-0.0976	-0.0219
1225	1225	longueur_plastron	19	52	-0.118	-4.83	1.76	0.00148	-0.0975	-0.0222
1226	1226	longueur_plastron	19	53	-0.123	-4.8	1.61	-0.00335	-0.0966	-0.0257
1227	1227	longueur_plastron	19	54	-0.128	-4.77	1.46	-0.00607	-0.0979	-0.0197
1228	1228	longueur_plastron	19	55	-0.133	-4.73	1.31	-0.0166	-0.0955	-0.0246
1229	1229	longueur_plastron	19	56	-0.137	-4.7	1.21	-0.00111	-0.098	-0.0197
1230	1230	longueur_plastron	19	57	-0.142	-4.68	1.12	-0.00714	-0.0944	-0.0323
1231	1231	longueur_plastron	19	58	-0.146	-4.65	1.03	-0.019	-0.0953	-0.0236
1232	1232	longueur_plastron	19	59	-0.152	-4.62	0.933	-0.0121	-0.0964	-0.0235
1233	1233	longueur_plastron	19	60	-0.159	-4.6	0.841	-0.0179	-0.0949	-0.0258
1234	1234	longueur_plastron	19	61	-0.166	-4.57	0.748	-0.0108	-0.0944	-0.0313
1235	1235	longueur_plastron	19	62	-0.174	-4.54	0.655	-0.0151	-0.0941	-0.0304
1236	1236	longueur_plastron	19	63	-0.181	-4.51	0.564	-0.0153	-0.0951	-0.0269
1237	1237	longueur_plastron	19	64	-0.19	-4.48	0.472	-0.0123	-0.0933	-0.0337
1238	1238	longueur_plastron	19	65	-0.198	-4.45	0.381	-0.00325	-0.0943	-0.0332
1239	1239	longueur_plastron	19	66	-0.206	-4.42	0.29	-0.0143	-0.0944	-0.0297
1240	1240	longueur_plastron	19	67	-0.214	-4.39	0.199	-0.00973	-0.0946	-0.0309
1241	1241	longueur_plastron	19	68	-0.222	-4.35	0.109	-0.00874	-0.0948	-0.0307
1242	1242	longueur_plastron	19	69	-0.231	-4.32	0.0188	-0.0112	-0.0941	-0.0319
1243	1243	longueur_plastron	19	70	-0.239	-4.29	-0.0727	-0.00823	-0.0923	-0.0376
1244	1244	longueur_plastron	19	71	-0.247	-4.25	-0.162	-0.00819	-0.0918	-0.0388
1245	1245	longueur_plastron	19	72	-0.255	-4.21	-0.252	-0.00813	-0.0939	-0.0335
1246	1246	longueur_plastron	19	73	-0.263	-4.18	-0.342	-0.00464	-0.0854	-0.0518
1247	1247	longueur_plastron	19	74	-0.271	-4.14	-0.436	-0.012	-0.0956	-0.0266
1248	1248	longueur_plastron	19	75	-0.28	-4.11	-0.534	-0.0199	-0.0961	-0.019
1249	1249	longueur_plastron	19	76	-0.29	-4.08	-0.634	-0.0212	-0.0965	-0.0151
1250	1250	longueur_plastron	19	77	-0.3	-4.04	-0.73	-0.00977	-0.0938	-0.0334
1251	1251	longueur_plastron	19	78	-0.31	-4.01	-0.827	-0.016	-0.0932	-0.0326
1252	1252	longueur_plastron	19	79	-0.32	-3.97	-0.923	-0.0128	-0.0937	-0.0324
1253	1253	longueur_plastron	19	80	-0.331	-3.93	-1.02	-0.0156	-0.0929	-0.0337
1254	1254	longueur_plastron	19	81	-0.341	-3.9	-1.11	-0.0211	-0.0905	-0.0369
1255	1255	longueur_plastron	19	82	-0.35	-3.85	-1.21	-0.0215	-0.0912	-0.0349
1256	1256	longueur_plastron	19	83	-0.36	-3.82	-1.3	-0.0149	-0.0913	-0.038
1257	1257	longueur_plastron	19	84	-0.369	-3.78	-1.4	-0.0167	-0.0907	-0.0386
1258	1258	longueur_plastron	19	85	-0.378	-3.73	-1.49	-0.0171	-0.091	-0.0377
1259	1259	longueur_plastron	19	86	-0.386	-3.69	-1.59	-0.0188	-0.0918	-0.035
1260	1260	longueur_plastron	19	87	-0.394	-3.66	-1.68	-0.0122	-0.092	-0.0373
1261	1261	longueur_plastron	19	88	-0.401	-3.62	-1.78	-0.00271	-0.09	-0.0436
1262	1262	longueur_plastron	19	89	-0.406	-3.57	-1.87	-0.012	-0.0921	-0.0372
1263	1263	longueur_plastron	19	90	-0.411	-3.53	-1.97	-0.0182	-0.0932	-0.0312
1264	1264	longueur_plastron	19	91	-0.416	-3.5	-2.07	-0.0214	-0.0902	-0.0374
1265	1265	longueur_plastron	19	92	-0.417	-3.45	-2.17	-0.0104	-0.0903	-0.0417
1266	1266	longueur_plastron	19	93	-0.419	-3.4	-2.27	-0.00741	-0.0924	-0.0376
1267	1267	longueur_plastron	19	94	-0.422	-3.37	-2.38	-0.0101	-0.0952	-0.0289
1268	1268	longueur_plastron	19	95	-0.423	-3.33	-2.48	-0.0147	-0.0921	-0.0361
1269	1269	longueur_plastron	19	96	-0.422	-3.29	-2.59	-0.00923	-0.0916	-0.0391
1270	1270	longueur_plastron	19	97	-0.421	-3.24	-2.69	-0.00896	-0.0932	-0.0352
1271	1271	longueur_plastron	19	98	-0.42	-3.2	-2.79	-0.0127	-0.0939	-0.0318
1272	1272	longueur_plastron	19	99	-0.418	-3.16	-2.9	-0.00268	-0.0928	-0.0371
1273	1273	longueur_plastron	19	100	-0.415	-3.12	-3	0.000526	-0.0914	-0.0405
1274	1274	longueur_plastron	19	101	-0.411	-3.07	-3.1	0.00447	-0.0881	-0.0471
1275	1275	longueur_plastron	19	102	-0.407	-3.02	-3.2	-0.000821	-0.0907	-0.0421
1276	1276	longueur_plastron	19	103	-0.404	-2.98	-3.31	-0.00775	-0.0914	-0.0398
1277	1277	longueur_plastron	19	104	-0.401	-2.93	-3.41	-0.00867	-0.091	-0.0406
1278	1278	longueur_plastron	19	105	-0.398	-2.89	-3.51	-0.0106	-0.0913	-0.0393
1279	1279	longueur_plastron	19	106	-0.395	-2.84	-3.61	-0.0103	-0.0879	-0.0466
1280	1280	longueur_plastron	19	107	-0.393	-2.79	-3.71	-0.0066	-0.0885	-0.046
1281	1281	longueur_plastron	19	108	-0.391	-2.73	-3.81	-0.00751	-0.0882	-0.0465
1282	1282	longueur_plastron	19	109	-0.389	-2.68	-3.91	-0.0104	-0.0844	-0.0526
1283	1283	longueur_plastron	19	110	-0.389	-2.63	-4	-0.0134	-0.0883	-0.0449
1284	1284	longueur_plastron	19	111	-0.389	-2.58	-4.1	-0.0113	-0.0887	-0.0448
1285	1285	longueur_plastron	19	112	-0.388	-2.53	-4.19	-0.0129	-0.0811	-0.0571
1286	1286	longueur_plastron	19	113	-0.388	-2.47	-4.28	-0.0213	-0.0838	-0.0503
1287	1287	longueur_plastron	19	114	-0.388	-2.42	-4.37	-0.00419	-0.0881	-0.0471
1288	1288	longueur_plastron	19	115	-0.388	-2.36	-4.46	-0.00268	-0.0875	-0.0483
1289	1289	longueur_plastron	19	116	-0.389	-2.31	-4.55	-0.0078	-0.0827	-0.0558
1290	1290	longueur_plastron	19	117	-0.389	-2.26	-4.65	-0.013	-0.0841	-0.0525
1291	1291	longueur_plastron	19	118	-0.39	-2.2	-4.74	-0.0193	-0.0861	-0.047
1292	1292	longueur_plastron	19	119	-0.391	-2.15	-4.83	-0.0203	-0.0832	-0.0516
1293	1293	longueur_plastron	19	120	-0.392	-2.09	-4.92	-0.0171	-0.0786	-0.0595
1294	1294	longueur_plastron	19	121	-0.394	-2.04	-5.01	0.00605	-0.0896	-0.044
1295	1295	longueur_plastron	19	122	-0.395	-1.99	-5.1	0.0169	-0.0898	-0.0407
1296	1296	longueur_plastron	19	123	-0.397	-1.94	-5.2	0.00494	-0.0911	-0.0409
1297	1297	longueur_plastron	19	124	-0.399	-1.9	-5.29	0.0124	-0.0875	-0.0468
1298	1298	longueur_plastron	19	125	-0.401	-1.84	-5.39	0.00343	-0.086	-0.0509
1299	1299	longueur_plastron	19	126	-0.403	-1.79	-5.48	0.0102	-0.0816	-0.0569
1300	1300	longueur_plastron	19	127	-0.405	-1.73	-5.57	0.00356	-0.0879	-0.0475
1301	1301	longueur_plastron	19	128	-0.408	-1.68	-5.65	0.00795	-0.0824	-0.0561
1302	1302	longueur_plastron	19	129	-0.411	-1.63	-5.73	0.00411	-0.0877	-0.0479
1303	1303	longueur_plastron	19	130	-0.414	-1.58	-5.82	0.0154	-0.0839	-0.0522
1304	1304	longueur_plastron	19	131	-0.417	-1.52	-5.9	0.00775	-0.0843	-0.0533
1305	1305	longueur_plastron	19	132	-0.421	-1.47	-5.98	0.00808	-0.0908	-0.0412
1306	1306	longueur_plastron	19	133	-0.424	-1.42	-6.07	0.0108	-0.0845	-0.0524
1307	1307	longueur_plastron	19	134	-0.428	-1.37	-6.15	0.00761	-0.0845	-0.0529
1308	1308	longueur_plastron	19	135	-0.432	-1.32	-6.23	0.00178	-0.0859	-0.0512
1309	1309	longueur_plastron	19	136	-0.436	-1.27	-6.32	0.00272	-0.0865	-0.05
1310	1310	longueur_plastron	19	137	-0.44	-1.22	-6.4	0.00416	-0.0859	-0.051
1311	1311	longueur_plastron	19	138	-0.444	-1.17	-6.49	0.00493	-0.081	-0.0584
1312	1312	longueur_plastron	19	139	-0.449	-1.12	-6.57	0.00263	-0.0889	-0.0457
1313	1313	longueur_plastron	19	140	-0.453	-1.06	-6.66	0.000171	-0.0839	-0.0544
1314	1314	longueur_plastron	19	141	-0.457	-1.02	-6.74	0.000893	-0.0869	-0.0495
1315	1315	longueur_plastron	19	142	-0.462	-0.963	-6.82	0.000884	-0.0843	-0.0537
1316	1316	longueur_plastron	19	143	-0.467	-0.912	-6.91	-0.00236	-0.0837	-0.0547
1317	1317	longueur_plastron	19	144	-0.471	-0.859	-6.99	-0.00139	-0.0845	-0.0534
1318	1318	longueur_plastron	19	145	-0.476	-0.804	-7.07	0.00482	-0.0815	-0.0577
1319	1319	longueur_plastron	19	146	-0.481	-0.744	-7.16	-0.00523	-0.0844	-0.0534
1320	1320	longueur_plastron	19	147	-0.486	-0.682	-7.25	0.00675	-0.0808	-0.0585
1321	1321	longueur_plastron	19	148	-0.491	-0.619	-7.33	0.000954	-0.0812	-0.0584
1322	1322	longueur_plastron	19	149	-0.497	-0.555	-7.42	-0.00476	-0.0782	-0.0621
1323	1323	longueur_plastron	19	150	-0.502	-0.491	-7.5	-0.00981	-0.0831	-0.0547
1324	1324	longueur_plastron	19	151	-0.508	-0.429	-7.59	-0.00212	-0.0796	-0.0605
1325	1325	longueur_plastron	19	152	-0.514	-0.362	-7.67	0.00341	-0.0765	-0.0643
1326	1326	longueur_plastron	19	153	-0.52	-0.293	-7.76	0.00282	-0.0762	-0.0648
1327	1327	longueur_plastron	19	154	-0.526	-0.224	-7.84	0.00235	-0.0761	-0.0648
1328	1328	longueur_plastron	19	155	-0.532	-0.156	-7.92	-0.00447	-0.0764	-0.0644
1329	1329	longueur_plastron	19	156	-0.538	-0.0889	-8	-0.00355	-0.0795	-0.0605
1330	1330	longueur_plastron	19	157	-0.544	-0.0208	-8.09	-7.91e-06	-0.0778	-0.0628
1331	1331	longueur_plastron	19	158	-0.55	0.0465	-8.17	-0.00262	-0.0769	-0.0638
1332	1332	longueur_plastron	19	159	-0.557	0.116	-8.25	7.37e-05	-0.0763	-0.0647
1333	1333	longueur_plastron	19	160	-0.562	0.176	-8.34	0.00178	-0.0827	-0.0562
1334	1334	longueur_plastron	19	161	-0.568	0.241	-8.42	-0.00898	-0.079	-0.0606
1335	1335	longueur_plastron	19	162	-0.575	0.303	-8.51	-0.00439	-0.0827	-0.0561
1336	1336	largeur_plastron	20	2	-7.3	-2.88	-0.0461	-0.0967	-0.0199	0.0158
1337	1337	largeur_plastron	20	3	-7.2	-2.99	-0.0615	-0.0445	-0.0891	-0.00877
1338	1338	largeur_plastron	20	4	-7.07	-3.04	-0.0753	-0.0331	-0.0942	0.00531
1339	1339	largeur_plastron	20	5	-6.93	-3.09	-0.0884	-0.025	-0.0955	-0.0162
1340	1340	largeur_plastron	20	6	-6.79	-3.13	-0.0995	-0.0193	-0.0977	-0.00902
1341	1341	largeur_plastron	20	7	-6.65	-3.17	-0.111	-0.0173	-0.0966	-0.019
1342	1342	largeur_plastron	20	8	-6.51	-3.19	-0.12	-0.0154	-0.0959	-0.0238
1343	1343	largeur_plastron	20	9	-6.37	-3.23	-0.13	-0.0254	-0.0951	-0.0175
1344	1344	largeur_plastron	20	10	-6.23	-3.26	-0.139	-0.0214	-0.0958	-0.0192
1345	1345	largeur_plastron	20	11	-6.08	-3.29	-0.147	-0.0275	-0.0943	-0.0186
1346	1346	largeur_plastron	20	12	-5.94	-3.33	-0.156	-0.0235	-0.095	-0.0207
1347	1347	largeur_plastron	20	13	-5.8	-3.35	-0.163	-0.0215	-0.0948	-0.0236
1348	1348	largeur_plastron	20	14	-5.66	-3.39	-0.172	-0.0157	-0.096	-0.0233
1349	1349	largeur_plastron	20	15	-5.52	-3.43	-0.179	-0.0297	-0.092	-0.0257
1350	1350	largeur_plastron	20	16	-5.37	-3.46	-0.186	-0.0201	-0.095	-0.0238
1351	1351	largeur_plastron	20	17	-5.23	-3.49	-0.194	-0.0241	-0.0922	-0.0302
1352	1352	largeur_plastron	20	18	-5.09	-3.53	-0.202	-0.0255	-0.0924	-0.0285
1353	1353	largeur_plastron	20	19	-4.95	-3.57	-0.211	-0.0269	-0.0925	-0.0267
1354	1354	largeur_plastron	20	20	-4.81	-3.61	-0.22	-0.027	-0.0928	-0.0256
1355	1355	largeur_plastron	20	21	-4.67	-3.65	-0.229	-0.0304	-0.091	-0.0283
1356	1356	largeur_plastron	20	22	-4.58	-3.68	-0.236	-0.0302	-0.0897	-0.0323
1357	1357	largeur_plastron	20	23	-4.49	-3.71	-0.243	-0.0253	-0.094	-0.023
1358	1358	largeur_plastron	20	24	-4.39	-3.73	-0.248	-0.0247	-0.0918	-0.0311
1359	1359	largeur_plastron	20	25	-4.3	-3.76	-0.253	-0.0246	-0.0926	-0.0286
1360	1360	largeur_plastron	20	26	-4.2	-3.78	-0.26	-0.0294	-0.0914	-0.0281
1361	1361	largeur_plastron	20	27	-4.11	-3.81	-0.267	-0.0236	-0.0929	-0.0284
1362	1362	largeur_plastron	20	28	-4.02	-3.83	-0.272	-0.0249	-0.093	-0.0271
1363	1363	largeur_plastron	20	29	-3.92	-3.85	-0.278	-0.0183	-0.0931	-0.0315
1364	1364	largeur_plastron	20	30	-3.83	-3.88	-0.284	-0.034	-0.0873	-0.035
1365	1365	largeur_plastron	20	31	-3.73	-3.9	-0.291	-0.0205	-0.0928	-0.0313
1366	1366	largeur_plastron	20	32	-3.64	-3.92	-0.297	-0.0247	-0.088	-0.0405
1367	1367	largeur_plastron	20	33	-3.54	-3.94	-0.301	-0.0183	-0.0926	-0.033
1368	1368	largeur_plastron	20	34	-3.45	-3.95	-0.305	-0.0128	-0.0916	-0.0381
1369	1369	largeur_plastron	20	35	-3.35	-3.96	-0.305	-0.0113	-0.0953	-0.0281
1370	1370	largeur_plastron	20	36	-3.25	-3.97	-0.307	-0.0119	-0.091	-0.0397
1371	1371	largeur_plastron	20	37	-3.15	-3.98	-0.31	-0.0168	-0.0931	-0.0324
1372	1372	largeur_plastron	20	38	-3.06	-3.99	-0.313	-0.00981	-0.0925	-0.0367
1373	1373	largeur_plastron	20	39	-2.96	-4	-0.314	-0.00395	-0.0929	-0.0369
1374	1374	largeur_plastron	20	40	-2.86	-4.01	-0.315	0.000224	-0.0929	-0.0371
1375	1375	largeur_plastron	20	41	-2.77	-4.02	-0.315	-0.0142	-0.0922	-0.0359
1376	1376	largeur_plastron	20	42	-2.58	-4.03	-0.317	-0.0106	-0.0909	-0.0403
1377	1377	largeur_plastron	20	43	-2.39	-4.05	-0.32	-0.0149	-0.0952	-0.0267
1378	1378	largeur_plastron	20	44	-2.2	-4.06	-0.321	0.000807	-0.0925	-0.0379
1379	1379	largeur_plastron	20	45	-2.01	-4.07	-0.322	-0.0136	-0.0938	-0.0318
1380	1380	largeur_plastron	20	46	-1.82	-4.08	-0.323	-0.00383	-0.0952	-0.0305
1381	1381	largeur_plastron	20	47	-1.63	-4.09	-0.322	-0.00126	-0.0934	-0.0357
1382	1382	largeur_plastron	20	48	-1.44	-4.1	-0.324	-0.0103	-0.0968	-0.023
1383	1383	largeur_plastron	20	49	-1.25	-4.12	-0.325	-0.00367	-0.0946	-0.0322
1384	1384	largeur_plastron	20	50	-1.06	-4.13	-0.329	-0.0115	-0.0931	-0.0345
1385	1385	largeur_plastron	20	51	-0.874	-4.15	-0.332	-0.00557	-0.093	-0.0365
1386	1386	largeur_plastron	20	52	-0.686	-4.17	-0.337	-0.0103	-0.0952	-0.0289
1387	1387	largeur_plastron	20	53	-0.497	-4.19	-0.342	-0.0111	-0.0943	-0.0315
1388	1388	largeur_plastron	20	54	-0.308	-4.19	-0.337	0.0283	-0.0812	-0.051
1389	1389	largeur_plastron	20	55	-0.118	-4.19	-0.337	-0.00897	-0.0905	-0.0415
1390	1390	largeur_plastron	20	56	0.0717	-4.2	-0.337	-0.0112	-0.0904	-0.0412
1391	1391	largeur_plastron	20	57	0.261	-4.21	-0.34	0.0032	-0.0917	-0.0398
1392	1392	largeur_plastron	20	58	0.451	-4.21	-0.34	0.00206	-0.0915	-0.0404
1393	1393	largeur_plastron	20	59	0.64	-4.21	-0.339	0.00561	-0.0926	-0.0372
1394	1394	largeur_plastron	20	60	0.83	-4.21	-0.338	0.00769	-0.0917	-0.0391
1395	1395	largeur_plastron	20	61	1.02	-4.2	-0.337	0.00755	-0.0942	-0.0326
1396	1396	largeur_plastron	20	62	1.16	-4.19	-0.334	0.00765	-0.093	-0.0359
1397	1397	largeur_plastron	20	63	1.3	-4.18	-0.33	0.00872	-0.093	-0.0356
1398	1398	largeur_plastron	20	64	1.44	-4.17	-0.328	0.00472	-0.0964	-0.0263
1399	1399	largeur_plastron	20	65	1.59	-4.16	-0.327	0.00656	-0.0956	-0.0286
1400	1400	largeur_plastron	20	66	1.73	-4.14	-0.324	0.00944	-0.0907	-0.0411
1401	1401	largeur_plastron	20	67	1.87	-4.13	-0.323	0.00898	-0.094	-0.0331
1402	1402	largeur_plastron	20	68	2.01	-4.12	-0.322	0.0104	-0.0926	-0.0363
1403	1403	largeur_plastron	20	69	2.15	-4.11	-0.321	0.0081	-0.0954	-0.029
1404	1404	largeur_plastron	20	70	2.29	-4.1	-0.321	0.00732	-0.0945	-0.032
1405	1405	largeur_plastron	20	71	2.43	-4.08	-0.319	0.0112	-0.0919	-0.0377
1406	1406	largeur_plastron	20	72	2.58	-4.07	-0.318	0.0112	-0.0922	-0.0371
1407	1407	largeur_plastron	20	73	2.72	-4.05	-0.316	0.00641	-0.0934	-0.035
1408	1408	largeur_plastron	20	74	2.86	-4.04	-0.315	0.0115	-0.0943	-0.0313
1409	1409	largeur_plastron	20	75	3	-4.02	-0.314	0.0107	-0.0952	-0.0287
1410	1410	largeur_plastron	20	76	3.14	-4.01	-0.313	0.0103	-0.0946	-0.0309
1411	1411	largeur_plastron	20	77	3.28	-3.99	-0.312	0.0106	-0.0946	-0.0305
1412	1412	largeur_plastron	20	78	3.42	-3.98	-0.31	0.0072	-0.0927	-0.0368
1413	1413	largeur_plastron	20	79	3.56	-3.97	-0.31	0.00916	-0.0924	-0.0371
1414	1414	largeur_plastron	20	80	3.71	-3.95	-0.309	0.0115	-0.0942	-0.0314
1415	1415	largeur_plastron	20	81	3.85	-3.93	-0.305	0.0153	-0.0934	-0.0324
1416	1416	largeur_plastron	20	82	4	-3.91	-0.301	0.0143	-0.0942	-0.0305
1417	1417	largeur_plastron	20	83	4.15	-3.88	-0.295	0.0182	-0.092	-0.0348
1418	1418	largeur_plastron	20	84	4.31	-3.85	-0.288	0.0242	-0.0931	-0.0274
1419	1419	largeur_plastron	20	85	4.46	-3.83	-0.282	0.0184	-0.0928	-0.0325
1420	1420	largeur_plastron	20	86	4.61	-3.8	-0.274	0.022	-0.0923	-0.0317
1421	1421	largeur_plastron	20	87	4.76	-3.76	-0.266	0.0207	-0.0919	-0.0335
1422	1422	largeur_plastron	20	88	4.92	-3.72	-0.257	0.0269	-0.0917	-0.0295
1423	1423	largeur_plastron	20	89	5.07	-3.69	-0.247	0.0259	-0.0907	-0.0332
1424	1424	largeur_plastron	20	90	5.22	-3.65	-0.239	0.0219	-0.0916	-0.0336
1425	1425	largeur_plastron	20	91	5.37	-3.62	-0.231	0.0239	-0.0921	-0.0307
1426	1426	largeur_plastron	20	92	5.52	-3.58	-0.221	0.0282	-0.0909	-0.0308
1427	1427	largeur_plastron	20	93	5.67	-3.54	-0.212	0.0241	-0.0922	-0.0303
1428	1428	largeur_plastron	20	94	5.82	-3.5	-0.204	0.0208	-0.0924	-0.0321
1429	1429	largeur_plastron	20	95	5.97	-3.46	-0.196	0.024	-0.0913	-0.033
1430	1430	largeur_plastron	20	96	6.13	-3.42	-0.187	0.0273	-0.0904	-0.033
1431	1431	largeur_plastron	20	97	6.28	-3.38	-0.177	0.0316	-0.0894	-0.0317
1432	1432	largeur_plastron	20	98	6.42	-3.33	-0.165	0.0342	-0.0889	-0.0303
1433	1433	largeur_plastron	20	99	6.57	-3.27	-0.146	0.0385	-0.0853	-0.0351
1434	1434	largeur_plastron	20	100	6.7	-3.19	-0.12	0.084	-0.0523	-0.0145
1435	1435	largeur_shell	21	2	6.93	-3.01	-0.0397	0.00585	-0.0956	-0.0287
1436	1436	largeur_shell	21	3	7.1	-3	-0.0375	0.00162	-0.0969	-0.0246
1437	1437	largeur_shell	21	4	7.27	-3.06	-0.0529	-0.0631	-0.0747	-0.0212
1438	1438	largeur_shell	21	5	7.44	-3.05	-0.0569	0.0338	-0.0926	-0.017
1439	1439	largeur_shell	21	6	7.6	-2.98	-0.0263	0.0624	-0.0778	0.00644
1440	1440	largeur_shell	21	7	7.72	-2.87	0.0233	0.0671	-0.0727	-0.0148
1441	1441	largeur_shell	21	8	7.86	-2.77	0.0671	0.0662	-0.073	-0.0169
1442	1442	largeur_shell	21	9	7.99	-2.67	0.112	0.0662	-0.0739	-0.0124
1443	1443	largeur_shell	21	10	8.12	-2.55	0.156	0.075	-0.0661	-0.00347
1444	1444	largeur_shell	21	11	8.24	-2.44	0.199	0.0765	-0.0629	-0.0141
1445	1445	largeur_shell	21	12	8.33	-2.3	0.249	0.0878	-0.0478	0.00327
1446	1446	largeur_shell	21	13	8.38	-2.14	0.299	0.0984	-0.00278	0.0174
1447	1447	largeur_shell	21	14	8.35	-1.97	0.338	0.096	0.024	0.0147
1448	1448	largeur_shell	21	15	8.31	-1.86	0.36	0.0933	0.0348	0.00883
1449	1449	largeur_shell	21	16	8.27	-1.74	0.382	0.0959	0.0221	0.0177
1450	1450	largeur_shell	21	17	8.25	-1.63	0.406	0.0957	0.017	0.0236
1451	1451	largeur_shell	21	18	8.22	-1.51	0.429	0.0945	0.0265	0.0194
1452	1452	largeur_shell	21	19	8.18	-1.39	0.451	0.0961	0.0217	0.0169
1453	1453	largeur_shell	21	20	8.15	-1.28	0.473	0.0945	0.0291	0.015
1454	1454	largeur_shell	21	21	8.11	-1.16	0.496	0.0958	0.022	0.0185
1455	1455	largeur_shell	21	22	8.08	-1.05	0.518	0.0943	0.025	0.0222
1456	1456	largeur_shell	21	23	8.04	-0.937	0.541	0.0929	0.0309	0.0204
1457	1457	largeur_shell	21	24	8	-0.824	0.564	0.0955	0.0246	0.0168
1458	1458	largeur_shell	21	25	7.96	-0.71	0.589	0.0943	0.0288	0.0168
1459	1459	largeur_shell	21	26	7.92	-0.597	0.613	0.0913	0.0374	0.0161
1460	1460	largeur_shell	21	27	7.87	-0.487	0.637	0.0919	0.0347	0.0188
1461	1461	largeur_shell	21	28	7.8	-0.339	0.669	0.091	0.0324	0.0259
1462	1462	largeur_shell	21	29	7.72	-0.194	0.7	0.0794	0.0547	0.0265
1463	1463	largeur_shell	21	30	7.6	-0.072	0.723	0.0441	0.0869	0.0224
1464	1464	largeur_shell	21	31	7.44	-0.0241	0.724	0.0877	0.046	-0.0137
1465	1465	largeur_shell	21	32	7.33	0.104	0.744	0.0646	0.0741	0.0182
1466	1466	largeur_shell	21	33	7.2	0.209	0.761	0.0591	0.0778	0.0214
1467	1467	largeur_shell	21	34	7.07	0.31	0.776	0.06	0.0769	0.0219
1468	1468	largeur_shell	21	35	6.93	0.411	0.793	0.0615	0.0756	0.0223
1469	1469	largeur_shell	21	36	6.8	0.517	0.811	0.0657	0.0722	0.0217
1470	1470	largeur_shell	21	37	6.68	0.632	0.835	0.0771	0.058	0.0264
1471	1471	largeur_shell	21	38	6.58	0.767	0.856	0.0616	0.0356	0.0703
1472	1472	largeur_shell	21	39	6.58	0.925	0.916	0.0972	0.00222	0.0236
1473	1473	largeur_shell	21	40	6.51	1.08	0.958	0.0743	0.0614	0.0264
1474	1474	largeur_shell	21	41	6.44	1.15	0.976	0.0759	0.0631	0.0158
1475	1475	largeur_shell	21	42	6.37	1.22	0.993	0.0687	0.0711	0.015
1476	1476	largeur_shell	21	43	6.29	1.29	1.01	0.0654	0.0717	0.0241
1477	1477	largeur_shell	21	44	6.21	1.36	1.02	0.0611	0.0759	0.0225
1478	1478	largeur_shell	21	45	6.13	1.42	1.04	0.0562	0.0808	0.0176
1479	1479	largeur_shell	21	46	6.04	1.48	1.05	0.0573	0.0809	0.0131
1480	1480	largeur_shell	21	47	5.96	1.54	1.07	0.0608	0.0773	0.0181
1481	1481	largeur_shell	21	48	5.87	1.6	1.08	0.0539	0.0824	0.0177
1482	1482	largeur_shell	21	49	5.79	1.66	1.1	0.0573	0.0804	0.0156
1483	1483	largeur_shell	21	50	5.7	1.72	1.11	0.0628	0.0759	0.0174
1484	1484	largeur_shell	21	51	5.61	1.77	1.12	0.0539	0.0816	0.0208
1485	1485	largeur_shell	21	52	5.53	1.83	1.14	0.057	0.0803	0.0177
1486	1486	largeur_shell	21	53	5.44	1.88	1.15	0.0489	0.0849	0.0201
1487	1487	largeur_shell	21	54	5.29	1.97	1.18	0.0463	0.0867	0.0186
1488	1488	largeur_shell	21	55	5.14	2.06	1.2	0.0523	0.0842	0.0134
1489	1489	largeur_shell	21	56	4.99	2.14	1.23	0.0538	0.082	0.0194
1490	1490	largeur_shell	21	57	4.83	2.22	1.25	0.053	0.082	0.0214
1491	1491	largeur_shell	21	58	4.69	2.32	1.28	0.0468	0.0869	0.0163
1492	1492	largeur_shell	21	59	4.54	2.41	1.31	0.0438	0.0894	0.00976
1493	1493	largeur_shell	21	60	4.39	2.5	1.34	0.0493	0.0862	0.0118
1494	1494	largeur_shell	21	61	4.24	2.59	1.36	0.0405	0.0905	0.0131
1495	1495	largeur_shell	21	62	4.09	2.68	1.39	0.0594	0.0774	0.022
1496	1496	largeur_shell	21	63	3.95	2.77	1.42	0.0566	0.0801	0.0197
1497	1497	largeur_shell	21	64	3.8	2.86	1.44	0.0604	0.0787	0.0127
1498	1498	largeur_shell	21	65	3.65	2.96	1.46	0.0444	0.0882	0.0157
1499	1499	largeur_shell	21	66	3.5	3.05	1.49	0.0627	0.0772	0.011
1500	1500	largeur_shell	21	67	3.37	3.15	1.51	0.058	0.0801	0.0149
1501	1501	largeur_shell	21	68	3.23	3.24	1.53	0.0486	0.0839	0.0244
1502	1502	largeur_shell	21	69	3.09	3.32	1.55	0.0514	0.084	0.0175
1503	1503	largeur_shell	21	70	2.95	3.41	1.57	0.0571	0.0812	0.012
1504	1504	largeur_shell	21	71	2.8	3.5	1.59	0.0509	0.0849	0.014
1505	1505	largeur_shell	21	72	2.66	3.58	1.61	0.0511	0.0848	0.0139
1506	1506	largeur_shell	21	73	2.51	3.66	1.62	0.0528	0.0843	0.0101
1507	1507	largeur_shell	21	74	2.36	3.73	1.64	0.0433	0.0896	0.00968
1508	1508	largeur_shell	21	75	2.21	3.8	1.65	0.0317	0.0932	0.0174
1509	1509	largeur_shell	21	76	2.05	3.87	1.67	0.0448	0.0882	0.0144
1510	1510	largeur_shell	21	77	1.9	3.94	1.68	0.0359	0.0923	0.0141
1511	1511	largeur_shell	21	78	1.74	4	1.69	0.0333	0.0926	0.0175
1512	1512	largeur_shell	21	79	1.59	4.05	1.7	0.0331	0.0922	0.0198
1513	1513	largeur_shell	21	80	1.42	4.11	1.71	0.0301	0.0941	0.0154
1514	1514	largeur_shell	21	81	1.25	4.16	1.73	0.0417	0.0889	0.019
1515	1515	largeur_shell	21	82	1.08	4.22	1.74	0.0276	0.0949	0.0152
1516	1516	largeur_shell	21	83	0.913	4.26	1.75	0.0288	0.0954	0.00807
1517	1517	largeur_shell	21	84	0.742	4.31	1.76	0.019	0.096	0.0205
1518	1518	largeur_shell	21	85	0.57	4.34	1.76	0.0215	0.0963	0.0162
1519	1519	largeur_shell	21	86	0.397	4.38	1.77	0.0191	0.0966	0.0176
1520	1520	largeur_shell	21	87	0.222	4.4	1.77	0.00381	0.0974	0.0221
1521	1521	largeur_shell	21	88	0.0458	4.41	1.78	0.00774	0.0978	0.0192
1522	1522	largeur_shell	21	89	-0.13	4.42	1.78	0.0102	0.0975	0.0198
1523	1523	largeur_shell	21	90	-0.306	4.43	1.78	0.00242	0.0984	0.0178
1524	1524	largeur_shell	21	91	-0.482	4.44	1.78	-0.00698	0.0976	0.0208
1525	1525	largeur_shell	21	92	-0.658	4.42	1.78	-0.00571	0.0982	0.018
1526	1526	largeur_shell	21	93	-0.852	4.4	1.77	-0.011	0.0978	0.0174
1527	1527	largeur_shell	21	94	-1.05	4.37	1.76	-0.0209	0.0967	0.0143
1528	1528	largeur_shell	21	95	-1.24	4.33	1.75	-0.0231	0.0963	0.0141
1529	1529	largeur_shell	21	96	-1.43	4.29	1.74	-0.0284	0.0942	0.0177
1530	1530	largeur_shell	21	97	-1.62	4.25	1.73	-0.0197	0.0966	0.0169
1531	1531	largeur_shell	21	98	-1.81	4.21	1.71	-0.0299	0.0941	0.016
1532	1532	largeur_shell	21	99	-2	4.16	1.7	-0.0292	0.0943	0.0163
1533	1533	largeur_shell	21	100	-2.19	4.11	1.69	-0.0255	0.0949	0.0188
1534	1534	largeur_shell	21	101	-2.37	4.05	1.67	-0.0374	0.0902	0.0216
1535	1535	largeur_shell	21	102	-2.56	3.99	1.65	-0.0353	0.0911	0.0214
1536	1536	largeur_shell	21	103	-2.74	3.92	1.64	-0.0377	0.0906	0.0194
1537	1537	largeur_shell	21	104	-2.92	3.84	1.62	-0.0422	0.0885	0.0198
1538	1538	largeur_shell	21	105	-3.1	3.76	1.6	-0.0471	0.0871	0.0142
1539	1539	largeur_shell	21	106	-3.28	3.66	1.58	-0.0438	0.0876	0.0201
1540	1540	largeur_shell	21	107	-3.46	3.57	1.56	-0.048	0.0868	0.0129
1541	1541	largeur_shell	21	108	-3.64	3.47	1.54	-0.0393	0.0912	0.0115
1542	1542	largeur_shell	21	109	-3.82	3.36	1.52	-0.0573	0.0797	0.0194
1543	1543	largeur_shell	21	110	-4	3.26	1.5	-0.0562	0.0801	0.0205
1544	1544	largeur_shell	21	111	-4.18	3.16	1.48	-0.0506	0.0837	0.021
1545	1545	largeur_shell	21	112	-4.35	3.04	1.46	-0.0515	0.0842	0.016
1546	1546	largeur_shell	21	113	-4.53	2.94	1.44	-0.0414	0.0893	0.0177
1547	1547	largeur_shell	21	114	-4.7	2.83	1.41	-0.0508	0.0857	0.00889
1548	1548	largeur_shell	21	115	-4.88	2.72	1.39	-0.0483	0.0834	0.0267
1549	1549	largeur_shell	21	116	-5.05	2.61	1.37	-0.0489	0.0845	0.0216
1550	1550	largeur_shell	21	117	-5.23	2.51	1.35	-0.0409	0.0828	0.0384
1551	1551	largeur_shell	21	118	-5.4	2.39	1.32	-0.049	0.0852	0.0185
1552	1552	largeur_shell	21	119	-5.52	2.32	1.31	-0.047	0.0847	0.0248
1553	1553	largeur_shell	21	120	-5.63	2.26	1.29	-0.0508	0.0836	0.0208
1554	1554	largeur_shell	21	121	-5.74	2.19	1.27	-0.0616	0.0774	0.015
1555	1555	largeur_shell	21	122	-5.85	2.11	1.26	-0.0542	0.0791	0.0283
1556	1556	largeur_shell	21	123	-5.97	2.05	1.24	-0.0584	0.0767	0.0266
1557	1557	largeur_shell	21	124	-6.08	1.97	1.22	-0.0539	0.0807	0.024
1558	1558	largeur_shell	21	125	-6.19	1.9	1.2	-0.0542	0.08	0.0259
1559	1559	largeur_shell	21	126	-6.3	1.83	1.18	-0.0589	0.078	0.0212
1560	1560	largeur_shell	21	127	-6.4	1.75	1.16	-0.0579	0.0799	0.0164
1561	1561	largeur_shell	21	128	-6.51	1.67	1.14	-0.0601	0.0792	0.0108
1562	1562	largeur_shell	21	129	-6.62	1.6	1.12	-0.0599	0.0766	0.0232
1563	1563	largeur_shell	21	130	-6.72	1.52	1.1	-0.065	0.0737	0.0183
1564	1564	largeur_shell	21	131	-6.82	1.43	1.08	-0.0659	0.0718	0.0226
1565	1565	largeur_shell	21	132	-6.95	1.29	1.04	-0.0925	0.0345	0.0157
1566	1566	largeur_shell	21	133	-6.96	1.1	0.985	-0.0984	-0.0178	0.00157
1567	1567	largeur_shell	21	134	-7.03	0.926	0.939	-0.0557	0.0799	0.0226
1568	1568	largeur_shell	21	135	-7.2	0.822	0.915	-0.0627	0.0762	0.0162
1569	1569	largeur_shell	21	136	-7.35	0.7	0.885	-0.0642	0.0737	0.0209
1570	1570	largeur_shell	21	137	-7.5	0.577	0.855	-0.0658	0.072	0.0223
1571	1571	largeur_shell	21	138	-7.61	0.421	0.812	-0.0934	0.0215	0.0287
1572	1572	largeur_shell	21	139	-7.79	0.35	0.799	0.019	0.0381	0.0905
1573	1573	largeur_shell	21	140	-7.98	0.375	0.802	-0.0514	0.0846	0.0144
1574	1574	largeur_shell	21	141	-8.12	0.24	0.764	-0.0812	0.0563	0.0156
1575	1575	largeur_shell	21	142	-8.22	0.0789	0.719	-0.0876	0.0434	0.0211
1576	1576	largeur_shell	21	143	-8.31	-0.0901	0.673	-0.0872	0.0467	0.0149
1577	1577	largeur_shell	21	144	-8.39	-0.261	0.626	-0.092	0.0386	0.0063
1578	1578	largeur_shell	21	145	-8.44	-0.378	0.593	-0.0915	0.0354	0.0195
1579	1579	largeur_shell	21	146	-8.48	-0.494	0.558	-0.0924	0.0305	0.023
1580	1580	largeur_shell	21	147	-8.53	-0.61	0.522	-0.0935	0.0261	0.0241
1581	1581	largeur_shell	21	148	-8.58	-0.724	0.486	-0.0917	0.0361	0.0167
1582	1582	largeur_shell	21	149	-8.63	-0.839	0.448	-0.0929	0.0326	0.0176
1583	1583	largeur_shell	21	150	-8.68	-0.952	0.41	-0.09	0.04	0.0174
1584	1584	largeur_shell	21	151	-8.72	-1.07	0.37	-0.0954	0.0253	0.0161
1585	1585	largeur_shell	21	152	-8.77	-1.18	0.331	-0.0937	0.0322	0.0135
1586	1586	largeur_shell	21	153	-8.82	-1.3	0.294	-0.0864	0.0441	0.0243
1587	1587	largeur_shell	21	154	-8.88	-1.41	0.26	-0.0849	0.0478	0.0227
1588	1588	largeur_shell	21	155	-8.93	-1.53	0.227	-0.097	0.0223	0.00931
1589	1589	largeur_shell	21	156	-8.94	-1.65	0.193	-0.0979	-0.0199	0.0039
1590	1590	largeur_shell	21	157	-8.89	-1.77	0.16	-0.0893	-0.0445	-0.00619
1591	1591	largeur_shell	21	158	-8.81	-1.89	0.127	-0.0802	-0.0594	-0.00717
1592	1592	largeur_shell	21	159	-8.72	-2	0.0986	-0.0779	-0.0626	-0.00449
1593	1593	largeur_shell	21	160	-8.62	-2.11	0.0727	-0.072	-0.0683	-0.0126
1594	1594	largeur_shell	21	161	-8.51	-2.22	0.0494	-0.0738	-0.0664	-0.0122
1595	1595	largeur_shell	21	162	-8.41	-2.33	0.0293	-0.0736	-0.0661	-0.0144
1596	1596	largeur_shell	21	163	-8.31	-2.44	0.0114	-0.0689	-0.0713	-0.0131
1597	1597	largeur_shell	21	164	-8.2	-2.54	-0.00363	-0.0703	-0.0701	-0.0122
1598	1598	largeur_shell	21	165	-8.09	-2.64	-0.0158	-0.0597	-0.0785	-0.0167
1599	1599	largeur_shell	21	166	-7.96	-2.72	-0.0261	-0.0221	-0.0958	-0.0181
1600	1600	largeur_shell	21	167	-7.81	-2.72	-0.0265	0.00877	-0.0976	-0.0201
1601	1601	largeur_shell	21	168	-7.66	-2.7	-0.026	0.00845	-0.0976	-0.0201
1602	1602	largeur_shell	21	169	-7.5	-2.7	-0.0273	-0.0117	-0.0978	-0.0171
1603	1603	L_marginals	22	2	0.0012	-2.08	11.4	0.0163	0.0416	0.0894
1604	1604	L_marginals	22	3	0.357	-2.13	11.3	0.0199	0.044	0.0876
1605	1605	L_marginals	22	4	0.7	-2.21	11.2	0.0308	0.0459	0.0833
1606	1606	L_marginals	22	5	1.47	-2.47	11	0.0917	-0.0315	0.0244
1607	1607	L_marginals	22	6	2.23	-2.76	10.7	0.0495	0.036	0.0791
1608	1608	L_marginals	22	7	2.94	-3.03	10.4	0.0431	0.0216	0.0876
1609	1609	L_marginals	22	8	3.5	-3.13	10.1	0.0374	0.0186	0.0908
1610	1610	L_marginals	22	9	4.04	-3.17	9.76	0.056	-0.00351	0.0828
1611	1611	L_marginals	22	10	4.55	-3.16	9.39	0.0601	-0.0276	0.0751
1612	1612	L_marginals	22	11	5.33	-3.06	8.73	0.0724	-0.0136	0.0676
1613	1613	L_marginals	22	12	6.03	-2.91	7.99	0.0764	-0.0185	0.0618
1614	1614	L_marginals	22	13	6.61	-2.78	7.15	0.0857	0.0166	0.0489
1615	1615	L_marginals	22	14	7.09	-2.7	6.2	0.0848	0.0014	0.053
1616	1616	L_marginals	22	15	7.46	-2.65	5.19	0.0985	-0.00295	0.0169
1617	1617	L_marginals	22	16	7.73	-2.6	4.16	0.0964	-0.0183	0.0193
1618	1618	L_marginals	22	17	7.87	-2.55	3.43	0.0974	-0.00984	0.0205
1619	1619	L_marginals	22	18	8.04	-2.52	2.7	0.0972	-0.00327	0.0233
1620	1620	L_marginals	22	19	8.21	-2.45	1.97	0.0986	-0.00407	0.0163
1621	1621	L_marginals	22	20	8.31	-2.28	0.965	0.0986	0.0163	-0.00397
1622	1622	L_marginals	22	21	8.42	-2.08	-0.0322	0.0974	-0.00997	0.0203
1623	1623	L_marginals	22	22	8.49	-1.85	-1.03	0.0997	0.00639	0.00344
1624	1624	L_marginals	22	23	8.49	-1.61	-2.04	0.0993	0.00536	-0.0104
1625	1625	L_marginals	22	24	8.51	-1.35	-3.05	0.0994	0.0107	0.00154
1626	1626	L_marginals	22	25	8.52	-1.07	-4.05	0.0989	-0.0139	-0.00554
1627	1627	L_marginals	22	26	8.45	-0.79	-4.92	0.0583	-0.0732	-0.0351
1628	1628	L_marginals	22	27	8.33	-0.473	-5.78	0.0893	-0.0282	-0.0351
1629	1629	L_marginals	22	28	8.07	-0.173	-6.6	0.0752	0.0644	-0.0137
1630	1630	L_marginals	22	29	7.84	0.135	-7.33	0.0817	0.00425	-0.0575
1631	1631	L_marginals	22	30	7.57	0.485	-8.02	0.0898	-0.0332	-0.0288
1632	1632	L_marginals	22	31	7.29	0.884	-8.68	0.0792	0.0605	-0.00767
1633	1633	L_marginals	22	32	6.84	1.14	-9.2	0.0648	0.0609	-0.0458
1634	1634	L_marginals	22	33	6.37	1.44	-9.67	0.0606	0.0754	-0.0253
1635	1635	L_marginals	22	34	5.88	1.76	-10.1	0.061	0.0781	-0.0134
1636	1636	L_marginals	22	35	5.38	2.01	-10.5	0.0427	0.0903	0.00563
1637	1637	L_marginals	22	36	4.82	2.18	-10.8	0.0869	0.0343	-0.0358
1638	1638	L_marginals	22	37	4.25	2.39	-11.1	0.0431	0.0856	-0.0286
1639	1639	L_marginals	22	38	3.52	2.7	-11.5	0.00973	0.0993	-0.00685
1640	1640	L_marginals	22	39	2.7	2.82	-11.8	0.00733	0.0958	-0.0278
1641	1641	L_marginals	22	40	1.87	2.87	-12.1	0.0147	0.0954	-0.026
1642	1642	L_marginals	22	41	1.48	2.9	-12.2	0.0259	0.0791	-0.0555
1643	1643	L_marginals	22	42	1.08	2.92	-12.4	0.0376	0.0612	-0.0696
1644	1644	L_marginals	22	43	0.671	2.98	-12.5	0.0251	0.0467	-0.0848
1645	1645	L_marginals	22	44	0.265	3.07	-12.6	0.0141	0.0637	-0.0758
1646	1646	L_marginals	22	45	-0.14	3.16	-12.5	-0.0363	0.0786	-0.0501
__________________________________________________
Staurotypus_triporcatus
	landmark	lm_name	curve_nb	semilandmark_nb	X	Y	Z	NX	NY	NZ
1	1	nuchal	NA	NA	-8.66	3	-2.78	-0.0809	0.0531	-0.0254
2	2	pygal	NA	NA	9.85	-0.297	5.46	0.0603	0.0743	0.029
3	3	xyphiplastron	NA	NA	5.83	-2.85	2.4	0.0576	-0.0811	-0.00996
4	4	epiplastron	NA	NA	-6.37	-0.134	-2.84	-0.0909	0.019	-0.0371
5	5	R_hypoplastron	NA	NA	5.02	0.266	-3.31	0.0218	-0.0953	0.0212
6	6	R_hyoplastron	NA	NA	-1.28	1.21	-6.17	-0.0345	-0.0859	-0.0378
7	7	L_hypoplastron	NA	NA	0.142	-3.1	5.6	0.073	-0.0145	-0.0667
8	8	L_hyoplastron	NA	NA	-6.15	-2.07	2.91	0.00553	-0.0578	-0.0814
9	9	R_middle_plastron	NA	NA	1.85	0.201	-5.09	0.016	-0.0811	-0.0563
10	10	L_middle_plastron	NA	NA	-3.17	-3.2	4.55	-0.00801	-0.0996	-0.00258
11	11	L_marginals	11	2	-8.72	2.96	-2.7	-0.0821	0.0499	-0.0276
12	12	L_marginals	11	3	-8.77	2.92	-2.62	-0.0865	0.0378	-0.0331
13	13	L_marginals	11	4	-8.81	2.87	-2.54	-0.0896	0.0323	-0.0304
14	14	L_marginals	11	5	-8.86	2.83	-2.45	-0.0895	0.0284	-0.0345
15	15	L_marginals	11	6	-8.9	2.78	-2.37	-0.0883	0.036	-0.03
16	16	L_marginals	11	7	-8.95	2.73	-2.29	-0.091	0.0249	-0.0331
17	17	L_marginals	11	8	-8.99	2.68	-2.21	-0.0909	0.0135	-0.0394
18	18	L_marginals	11	9	-9.03	2.63	-2.12	-0.0927	0.00944	-0.0364
19	19	L_marginals	11	10	-9.06	2.58	-2.04	-0.0962	0.0228	-0.0152
20	20	L_marginals	11	11	-9.09	2.52	-1.95	-0.0936	0.0167	-0.0309
21	21	L_marginals	11	12	-9.14	2.47	-1.87	-0.09	0.0245	-0.0361
22	22	L_marginals	11	13	-9.18	2.42	-1.8	-0.0894	0.0302	-0.033
23	23	L_marginals	11	14	-9.22	2.36	-1.72	-0.0953	0.0206	-0.0224
24	24	L_marginals	11	15	-9.25	2.32	-1.65	-0.0973	0.016	-0.0166
25	25	L_marginals	11	16	-9.27	2.27	-1.59	-0.0949	0.02	-0.0245
26	26	L_marginals	11	17	-9.29	2.23	-1.53	-0.0948	0.0162	-0.0273
27	27	L_marginals	11	18	-9.31	2.18	-1.47	-0.0957	0.0186	-0.0224
28	28	L_marginals	11	19	-9.33	2.13	-1.41	-0.0968	0.0116	-0.0223
29	29	L_marginals	11	20	-9.35	2.08	-1.35	-0.0952	0.0108	-0.0286
30	30	L_marginals	11	21	-9.38	2.03	-1.3	-0.0968	0.011	-0.0228
31	31	L_marginals	11	22	-9.4	1.98	-1.24	-0.0964	0.0131	-0.023
32	32	L_marginals	11	23	-9.42	1.93	-1.18	-0.0941	0.0184	-0.0285
33	33	L_marginals	11	24	-9.44	1.88	-1.13	-0.0948	0.0202	-0.0248
34	34	L_marginals	11	25	-9.46	1.82	-1.08	-0.0951	0.0175	-0.0253
35	35	L_marginals	11	26	-9.49	1.76	-1.03	-0.0963	0.0209	-0.0173
36	36	L_marginals	11	27	-9.51	1.71	-0.977	-0.0958	0.018	-0.0222
37	37	L_marginals	11	28	-9.54	1.63	-0.916	-0.0945	0.0301	-0.0127
38	38	L_marginals	11	29	-9.56	1.55	-0.859	-0.0969	0.0244	-0.00448
39	39	L_marginals	11	30	-9.59	1.47	-0.805	-0.0945	0.0322	-0.00476
40	40	L_marginals	11	31	-9.61	1.38	-0.752	-0.0972	0.0202	0.0118
41	41	L_marginals	11	32	-9.63	1.3	-0.699	-0.0925	0.022	0.0308
42	42	L_marginals	11	33	-9.62	1.21	-0.648	-0.0953	-0.00506	0.0299
43	43	L_marginals	11	34	-9.62	1.12	-0.598	-0.0975	0.0107	0.0193
44	44	L_marginals	11	35	-9.61	1.03	-0.546	-0.099	0.00753	0.0118
45	45	L_marginals	11	36	-9.62	0.949	-0.492	-0.098	0.0138	0.0145
46	46	L_marginals	11	37	-9.61	0.864	-0.436	-0.1	0.00202	-0.000315
47	47	L_marginals	11	38	-9.6	0.782	-0.377	-0.096	0.0114	0.0256
48	48	L_marginals	11	39	-9.59	0.703	-0.315	-0.098	-0.0194	0.00438
49	49	L_marginals	11	40	-9.58	0.628	-0.247	-0.0955	0.0199	0.0221
50	50	L_marginals	11	41	-9.56	0.553	-0.166	-0.0962	-0.00552	0.0267
51	51	L_marginals	11	42	-9.54	0.48	-0.0856	-0.0952	0.00687	0.0297
52	52	L_marginals	11	43	-9.51	0.412	-0.000987	-0.0928	0.0206	0.0311
53	53	L_marginals	11	44	-9.48	0.346	0.0836	-0.0899	0.0155	0.041
54	54	L_marginals	11	45	-9.46	0.285	0.173	-0.0837	0.029	0.0464
55	55	L_marginals	11	46	-9.43	0.226	0.262	-0.0781	0.038	0.0495
56	56	L_marginals	11	47	-9.4	0.168	0.351	-0.0736	0.0454	0.0502
57	57	L_marginals	11	48	-9.36	0.112	0.443	-0.0715	0.0499	0.049
58	58	L_marginals	11	49	-9.33	0.0596	0.536	-0.0637	0.058	0.0508
59	59	L_marginals	11	50	-9.3	0.00633	0.628	-0.0668	0.0534	0.0518
60	60	L_marginals	11	51	-9.27	-0.0459	0.72	-0.0594	0.0554	0.0584
61	61	L_marginals	11	52	-9.23	-0.0997	0.811	-0.0462	0.0615	0.0639
62	62	L_marginals	11	53	-9.19	-0.159	0.894	-0.0656	0.0439	0.0614
63	63	L_marginals	11	54	-9.14	-0.22	0.974	-0.0781	0.0243	0.0575
64	64	L_marginals	11	55	-9.1	-0.283	1.05	-0.0767	0.0396	0.0505
65	65	L_marginals	11	56	-9.05	-0.344	1.13	-0.0805	0.00899	0.0586
66	66	L_marginals	11	57	-9	-0.406	1.21	-0.0858	-0.0138	0.0494
67	67	L_marginals	11	58	-8.95	-0.469	1.28	-0.0836	-0.0159	0.0525
68	68	L_marginals	11	59	-8.9	-0.532	1.36	-0.0878	-0.0232	0.0419
69	69	L_marginals	11	60	-8.84	-0.594	1.43	-0.0823	-0.0295	0.0485
70	70	L_marginals	11	61	-8.79	-0.654	1.5	-0.083	-0.0368	0.0419
71	71	L_marginals	11	62	-8.73	-0.713	1.57	-0.081	-0.0434	0.0395
72	72	L_marginals	11	63	-8.66	-0.769	1.64	-0.0814	-0.0391	0.0431
73	73	L_marginals	11	64	-8.6	-0.824	1.72	-0.0854	-0.0323	0.0408
74	74	L_marginals	11	65	-8.54	-0.875	1.79	-0.0824	-0.0341	0.0453
75	75	L_marginals	11	66	-8.47	-0.922	1.87	-0.0775	-0.0348	0.0527
76	76	L_marginals	11	67	-8.41	-0.971	1.95	-0.0838	-0.0171	0.0518
77	77	L_marginals	11	68	-8.33	-1.02	2.03	-0.0743	-0.0396	0.054
78	78	L_marginals	11	69	-8.26	-1.06	2.12	-0.0763	-0.0274	0.0585
79	79	L_marginals	11	70	-8.19	-1.1	2.2	-0.0771	-0.0258	0.0583
80	80	L_marginals	11	71	-8.11	-1.14	2.29	-0.0744	-0.018	0.0643
81	81	L_marginals	11	72	-8.04	-1.17	2.37	-0.0772	-0.0169	0.0613
82	82	L_marginals	11	73	-7.96	-1.2	2.45	-0.0663	-0.0115	0.0739
83	83	L_marginals	11	74	-7.87	-1.23	2.53	-0.0718	-0.0173	0.0674
84	84	L_marginals	11	75	-7.78	-1.26	2.6	-0.063	-0.032	0.0708
85	85	L_marginals	11	76	-7.7	-1.29	2.68	-0.0715	-0.0258	0.065
86	86	L_marginals	11	77	-7.61	-1.32	2.76	-0.0693	-0.0277	0.0665
87	87	L_marginals	11	78	-7.53	-1.35	2.84	-0.0625	-0.0267	0.0734
88	88	L_marginals	11	79	-7.44	-1.38	2.92	-0.0642	-0.0205	0.0739
89	89	L_marginals	11	80	-7.35	-1.41	3	-0.0612	-0.0173	0.0772
90	90	L_marginals	11	81	-7.25	-1.44	3.08	-0.0629	-0.0183	0.0756
91	91	L_marginals	11	82	-7.15	-1.47	3.16	-0.0653	-0.028	0.0703
92	92	L_marginals	11	83	-7.06	-1.5	3.24	-0.064	-0.018	0.0747
93	93	L_marginals	11	84	-6.97	-1.52	3.32	-0.0671	-0.0209	0.0711
94	94	L_marginals	11	85	-6.87	-1.55	3.4	-0.0636	-0.0127	0.0761
95	95	L_marginals	11	86	-6.77	-1.58	3.48	-0.0657	-0.00687	0.0751
96	96	L_marginals	11	87	-6.67	-1.6	3.55	-0.0612	0.0155	0.0776
97	97	L_marginals	11	88	-6.57	-1.63	3.63	-0.0554	0.0244	0.0796
98	98	L_marginals	11	89	-6.47	-1.65	3.7	-0.0501	0.0331	0.08
99	99	L_marginals	11	90	-6.37	-1.68	3.78	-0.0512	0.0187	0.0838
100	100	L_marginals	11	91	-6.27	-1.7	3.86	-0.0574	0.0224	0.0787
101	101	L_marginals	11	92	-6.17	-1.72	3.94	-0.0398	0.0466	0.079
102	102	L_marginals	11	93	-6.07	-1.73	4.02	-0.0537	0.0252	0.0805
103	103	L_marginals	11	94	-5.96	-1.76	4.08	-0.0558	0.0234	0.0796
104	104	L_marginals	11	95	-5.86	-1.77	4.15	-0.0515	0.0355	0.078
105	105	L_marginals	11	96	-5.75	-1.78	4.23	-0.0525	0.0367	0.0768
106	106	L_marginals	11	97	-5.65	-1.8	4.31	-0.054	0.0277	0.0795
107	107	L_marginals	11	98	-5.54	-1.81	4.38	-0.0519	0.0221	0.0826
108	108	L_marginals	11	99	-5.44	-1.82	4.45	-0.0531	0.0213	0.082
109	109	L_marginals	11	100	-5.33	-1.83	4.52	-0.0533	0.0154	0.0832
110	110	L_marginals	11	101	-5.23	-1.85	4.59	-0.0526	0.0164	0.0835
111	111	L_marginals	11	102	-5.12	-1.86	4.67	-0.0541	0.0178	0.0822
112	112	L_marginals	11	103	-5.01	-1.88	4.73	-0.0457	0.0276	0.0845
113	113	L_marginals	11	104	-4.9	-1.9	4.8	-0.0491	-0.0055	0.087
114	114	L_marginals	11	105	-4.79	-1.92	4.87	-0.056	0.00735	0.0825
115	115	L_marginals	11	106	-4.67	-1.95	4.95	-0.0579	-0.00242	0.0815
116	116	L_marginals	11	107	-4.55	-1.98	5.02	-0.0435	0.00863	0.0897
117	117	L_marginals	11	108	-4.44	-2.01	5.1	-0.0526	0.0132	0.084
118	118	L_marginals	11	109	-4.31	-2.05	5.17	-0.0323	0.000409	0.0946
119	119	L_marginals	11	110	-4.19	-2.08	5.24	-0.0551	0.00167	0.0834
120	120	L_marginals	11	111	-4.08	-2.11	5.32	-0.0534	0.0109	0.0838
121	121	L_marginals	11	112	-3.96	-2.15	5.4	-0.0523	0.0015	0.0852
122	122	L_marginals	11	113	-3.84	-2.19	5.47	-0.0479	-0.0106	0.0871
123	123	L_marginals	11	114	-3.71	-2.22	5.53	-0.0512	-0.0148	0.0846
124	124	L_marginals	11	115	-3.59	-2.26	5.6	-0.0525	-0.0198	0.0828
125	125	L_marginals	11	116	-3.47	-2.3	5.66	-0.0489	-0.0131	0.0863
126	126	L_marginals	11	117	-3.34	-2.34	5.73	-0.0432	-0.0219	0.0875
127	127	L_marginals	11	118	-3.22	-2.37	5.79	-0.0532	0.0114	0.0839
128	128	L_marginals	11	119	-3.08	-2.41	5.87	-0.0374	0.0212	0.0903
129	129	L_marginals	11	120	-2.93	-2.46	5.95	-0.043	0.0308	0.0849
130	130	L_marginals	11	121	-2.79	-2.5	6.01	-0.0238	0.0379	0.0894
131	131	L_marginals	11	122	-2.64	-2.55	6.07	-0.0234	0.0298	0.0925
132	132	L_marginals	11	123	-2.49	-2.6	6.12	-0.0269	0.0113	0.0956
133	133	L_marginals	11	124	-2.34	-2.65	6.18	-0.0348	0.0133	0.0928
134	134	L_marginals	11	125	-2.19	-2.69	6.25	-0.0371	0.00204	0.0928
135	135	L_marginals	11	126	-2.04	-2.74	6.31	-0.0419	-0.00209	0.0908
136	136	L_marginals	11	127	-1.89	-2.78	6.37	-0.0339	-0.00818	0.0937
137	137	L_marginals	11	128	-1.74	-2.83	6.43	-0.0425	-0.009	0.0901
138	138	L_marginals	11	129	-1.59	-2.87	6.49	-0.0404	-0.00968	0.091
139	139	L_marginals	11	130	-1.44	-2.91	6.55	-0.0402	0.0013	0.0916
140	140	L_marginals	11	131	-1.29	-2.94	6.62	-0.044	0.0231	0.0868
141	141	L_marginals	11	132	-1.12	-2.98	6.71	-0.032	0.0374	0.0871
142	142	L_marginals	11	133	-0.938	-3.02	6.79	-0.0313	0.0431	0.0846
143	143	L_marginals	11	134	-0.759	-3.06	6.87	-0.0286	0.0449	0.0847
144	144	L_marginals	11	135	-0.574	-3.1	6.94	-0.0388	-0.00164	0.0921
145	145	L_marginals	11	136	-0.388	-3.15	7	-0.0371	0.0186	0.091
146	146	L_marginals	11	137	-0.206	-3.18	7.08	-0.0285	0.0323	0.0902
147	147	L_marginals	11	138	-0.0247	-3.22	7.16	-0.028	0.0456	0.0844
148	148	L_marginals	11	139	0.156	-3.25	7.24	-0.0354	0.0324	0.0877
149	149	L_marginals	11	140	0.337	-3.28	7.32	-0.0372	0.0252	0.0893
150	150	L_marginals	11	141	0.521	-3.3	7.4	-0.0372	0.0184	0.091
151	151	L_marginals	11	142	0.704	-3.32	7.48	-0.0396	0.00482	0.0917
152	152	L_marginals	11	143	0.89	-3.33	7.56	-0.0342	0.00891	0.0936
153	153	L_marginals	11	144	1.07	-3.34	7.64	-0.0381	0.0206	0.0902
154	154	L_marginals	11	145	1.26	-3.35	7.72	-0.0376	0.00423	0.0926
155	155	L_marginals	11	146	1.44	-3.35	7.79	-0.0334	0.0102	0.0937
156	156	L_marginals	11	147	1.63	-3.35	7.85	-0.0286	0.0146	0.0947
157	157	L_marginals	11	148	1.83	-3.35	7.88	-0.0165	0.0209	0.0964
158	158	L_marginals	11	149	2.03	-3.35	7.91	-0.00473	-0.00192	0.0999
159	159	L_marginals	11	150	2.22	-3.34	7.91	-0.00872	0.0223	0.0971
160	160	L_marginals	11	151	2.42	-3.33	7.94	-0.0224	0.0386	0.0895
161	161	L_marginals	11	152	2.62	-3.31	7.97	-0.0157	0.0347	0.0924
162	162	L_marginals	11	153	2.81	-3.29	8	-0.0154	0.0216	0.0964
163	163	L_marginals	11	154	3.01	-3.27	8.03	-0.0197	0.0272	0.0942
164	164	L_marginals	11	155	3.2	-3.25	8.06	-0.0178	0.0254	0.0951
165	165	L_marginals	11	156	3.4	-3.23	8.09	0.00094	-0.0045	0.0999
166	166	L_marginals	11	157	3.59	-3.21	8.12	-0.0186	-0.0146	0.0972
167	167	L_marginals	11	158	3.73	-3.19	8.15	-0.0159	0.0068	0.0985
168	168	L_marginals	11	159	3.86	-3.17	8.17	-0.0156	-0.0345	0.0925
169	169	L_marginals	11	160	4	-3.15	8.19	-0.0194	0.00613	0.0979
170	170	L_marginals	11	161	4.13	-3.12	8.2	-0.0122	0.0147	0.0982
171	171	L_marginals	11	162	4.27	-3.09	8.22	-0.00672	0.0247	0.0967
172	172	L_marginals	11	163	4.4	-3.06	8.23	-0.00571	0.0383	0.0922
173	173	L_marginals	11	164	4.53	-3.02	8.23	-0.00976	0.032	0.0942
174	174	L_marginals	11	165	4.67	-2.99	8.23	-0.00997	0.0566	0.0818
175	175	L_marginals	11	166	4.8	-2.95	8.22	-0.00567	0.0471	0.088
176	176	L_marginals	11	167	4.93	-2.91	8.2	0.0162	0.0571	0.0805
177	177	L_marginals	11	168	5.06	-2.89	8.15	0.0156	0.0266	0.0951
178	178	L_marginals	11	169	5.19	-2.86	8.13	-0.0019	0.031	0.0951
179	179	L_marginals	11	170	5.32	-2.82	8.13	-0.00496	0.0426	0.0904
180	180	L_marginals	11	171	5.43	-2.78	8.12	-0.00388	0.0536	0.0844
181	181	L_marginals	11	172	5.54	-2.75	8.12	-0.0194	0.0586	0.0787
182	182	L_marginals	11	173	5.65	-2.71	8.11	-0.0141	0.0564	0.0814
183	183	L_marginals	11	174	5.76	-2.67	8.1	-0.0122	0.0624	0.0772
184	184	L_marginals	11	175	5.87	-2.63	8.1	-0.00993	0.0532	0.0841
185	185	L_marginals	11	176	5.98	-2.59	8.09	-0.0265	0.0462	0.0846
186	186	L_marginals	11	177	6.08	-2.54	8.08	-0.0166	0.0614	0.0772
187	187	L_marginals	11	178	6.19	-2.5	8.07	0.0121	0.042	0.09
188	188	L_marginals	11	179	6.29	-2.45	8.06	0.0144	0.0406	0.0902
189	189	L_marginals	11	180	6.4	-2.41	8.03	-0.0239	-0.0239	0.0941
190	190	L_marginals	11	181	6.5	-2.36	8.01	0.00826	-0.0195	0.0977
191	191	L_marginals	11	182	6.6	-2.31	8.01	-0.0183	0.0331	0.0925
192	192	L_marginals	11	183	6.71	-2.26	7.98	0.0212	0.0338	0.0917
193	193	L_marginals	11	184	6.81	-2.21	7.97	-0.00795	-0.05	0.0862
194	194	L_marginals	11	185	6.92	-2.15	7.96	-0.00551	0.0202	0.0978
195	195	L_marginals	11	186	7.02	-2.09	7.94	-0.0158	0.0607	0.0779
196	196	L_marginals	11	187	7.12	-2.03	7.91	-0.0232	0.0649	0.0725
197	197	L_marginals	11	188	7.22	-1.97	7.88	-0.00953	0.0591	0.0801
198	198	L_marginals	11	189	7.32	-1.91	7.84	-0.0237	0.0688	0.0686
199	199	L_marginals	11	190	7.42	-1.85	7.81	-0.0123	0.0705	0.0699
200	200	L_marginals	11	191	7.52	-1.8	7.77	-0.00347	0.0663	0.0748
201	201	L_marginals	11	192	7.62	-1.74	7.72	0.0135	0.0644	0.0753
202	202	L_marginals	11	193	7.71	-1.69	7.66	-0.00399	0.0818	0.0574
203	203	L_marginals	11	194	7.79	-1.64	7.59	0.0293	0.0703	0.0647
204	204	L_marginals	11	195	7.84	-1.64	7.48	0.00781	0.0216	0.0973
205	205	L_marginals	11	196	7.94	-1.59	7.43	0.00756	0.0226	0.0971
206	206	L_marginals	11	197	8.02	-1.55	7.41	0.0292	0.0163	0.0942
207	207	L_marginals	11	198	8.1	-1.52	7.38	0.0598	-0.0144	0.0788
208	208	L_marginals	11	199	8.18	-1.49	7.33	0.00775	0.0349	0.0934
209	209	L_marginals	11	200	8.26	-1.46	7.3	0.0221	-0.0311	0.0924
210	210	L_marginals	11	201	8.35	-1.42	7.28	0.00334	0.0137	0.099
211	211	L_marginals	11	202	8.43	-1.39	7.26	0.0136	0.0406	0.0904
212	212	L_marginals	11	203	8.52	-1.35	7.23	0.0104	0.0496	0.0862
213	213	L_marginals	11	204	8.6	-1.33	7.19	0.0399	0.0363	0.0842
214	214	L_marginals	11	205	8.68	-1.3	7.16	0.00979	0.0493	0.0864
215	215	L_marginals	11	206	8.76	-1.27	7.11	0.0269	0.0625	0.0733
216	216	L_marginals	11	207	8.84	-1.24	7.07	-0.00886	0.0672	0.0735
217	217	L_marginals	11	208	8.92	-1.21	7.03	0.0104	0.0711	0.0696
218	218	L_marginals	11	209	9	-1.18	6.98	0.0215	0.0634	0.0743
219	219	L_marginals	11	210	9.06	-1.15	6.94	0.0179	0.0663	0.0727
220	220	L_marginals	11	211	9.13	-1.12	6.9	0.0059	0.0647	0.0761
221	221	L_marginals	11	212	9.19	-1.09	6.86	0.026	0.0697	0.0668
222	222	L_marginals	11	213	9.24	-1.08	6.8	0.00216	-0.0141	0.099
223	223	L_marginals	11	214	9.31	-1.03	6.78	0.0326	0.0478	0.0815
224	224	L_marginals	11	215	9.35	-1.02	6.72	0.0141	-0.0454	0.088
225	225	L_marginals	11	216	9.43	-0.97	6.69	0.0342	0.0372	0.0863
226	226	L_marginals	11	217	9.48	-0.938	6.65	0.0347	0.0321	0.0881
227	227	L_marginals	11	218	9.53	-0.906	6.6	0.0353	0.0274	0.0895
228	228	L_marginals	11	219	9.58	-0.872	6.55	0.0361	0.0236	0.0902
229	229	L_marginals	11	220	9.61	-0.857	6.48	0.0602	-0.0741	0.0297
230	230	L_marginals	11	221	9.66	-0.815	6.42	0.0846	-0.0476	0.024
231	231	L_marginals	11	222	9.7	-0.769	6.38	0.0417	0.0194	0.0888
232	232	L_marginals	11	223	9.75	-0.723	6.33	0.0183	0.0578	0.0795
233	233	L_marginals	11	224	9.79	-0.681	6.26	0.0303	0.0716	0.0629
234	234	L_marginals	11	225	9.81	-0.641	6.2	0.0143	0.0795	0.0589
235	235	L_marginals	11	226	9.84	-0.601	6.13	0.0105	0.083	0.0548
236	236	L_marginals	11	227	9.86	-0.561	6.06	0.0344	0.0771	0.0536
237	237	L_marginals	11	228	9.88	-0.516	5.99	0.0559	0.0593	0.0579
238	238	L_marginals	11	229	9.89	-0.476	5.92	0.0549	0.0717	0.0429
239	239	L_marginals	11	230	9.9	-0.437	5.84	0.0633	0.0685	0.0362
240	240	L_marginals	11	231	9.9	-0.402	5.77	0.0762	0.0556	0.0331
241	241	L_marginals	11	232	9.89	-0.374	5.69	0.0761	0.0635	0.0129
242	242	L_marginals	11	233	9.88	-0.345	5.61	0.0727	0.0676	0.0121
243	243	L_marginals	11	234	9.86	-0.325	5.53	0.0666	0.0745	0.00458
244	244	R_marginals	12	2	9.9	-0.273	5.36	0.0375	0.0554	0.0743
245	245	R_marginals	12	3	9.97	-0.222	5.29	0.0326	0.0672	0.0665
246	246	R_marginals	12	4	10.1	-0.153	5.23	0.0262	0.0226	0.0938
247	247	R_marginals	12	5	10.1	-0.08	5.18	-0.00586	0.0705	0.0707
248	248	R_marginals	12	6	10.2	-0.0283	5.1	0.0088	0.0857	0.0507
249	249	R_marginals	12	7	10.2	0.00357	5.01	-0.0105	0.0979	0.0174
250	250	R_marginals	12	8	10.3	0.0365	4.91	-0.0674	0.0738	-0.00272
251	251	R_marginals	12	9	10.4	0.115	4.85	-0.0828	0.0561	-0.00243
252	252	R_marginals	12	10	10.4	0.177	4.76	-0.0764	0.0644	-0.00331
253	253	R_marginals	12	11	10.5	0.222	4.67	-0.0707	0.0707	-0.000842
254	254	R_marginals	12	12	10.5	0.246	4.57	-0.052	0.0854	0.000582
255	255	R_marginals	12	13	10.5	0.259	4.46	-0.012	0.0972	0.0204
256	256	R_marginals	12	14	10.6	0.271	4.35	-0.0112	0.0988	0.0109
257	257	R_marginals	12	15	10.6	0.287	4.24	0.00475	0.0975	0.0216
258	258	R_marginals	12	16	10.6	0.306	4.14	0.0104	0.0937	0.0333
259	259	R_marginals	12	17	10.7	0.331	4.04	0.0308	0.094	0.0148
260	260	R_marginals	12	18	10.7	0.34	3.93	0.0168	0.0983	0.00716
261	261	R_marginals	12	19	10.7	0.323	3.83	0.0447	0.0863	-0.0233
262	262	R_marginals	12	20	10.6	0.291	3.73	0.0356	0.0927	-0.012
263	263	R_marginals	12	21	10.6	0.231	3.58	0.0556	0.0799	0.023
264	264	R_marginals	12	22	10.6	0.239	3.55	0.0416	0.0903	0.0111
265	265	R_marginals	12	23	10.6	0.25	3.45	0.0307	0.0948	0.00843
266	266	R_marginals	12	24	10.6	0.297	3.33	0.0511	0.0597	0.0618
267	267	R_marginals	12	25	10.6	0.269	3.24	0.0603	0.0777	0.0178
268	268	R_marginals	12	26	10.6	0.28	3.14	0.0749	0.0656	0.00898
269	269	R_marginals	12	27	10.6	0.28	3.03	0.0368	0.0929	0.00318
270	270	R_marginals	12	28	10.6	0.277	2.92	0.0678	0.048	0.0558
271	271	R_marginals	12	29	10.6	0.28	2.82	0.0712	0.0479	0.0513
272	272	R_marginals	12	30	10.6	0.285	2.7	0.074	0.0491	0.046
273	273	R_marginals	12	31	10.6	0.292	2.57	0.0753	0.0514	0.0411
274	274	R_marginals	12	32	10.5	0.3	2.45	0.0753	0.0547	0.0367
275	275	R_marginals	12	33	10.6	0.314	2.29	0.0895	0.0128	0.0427
276	276	R_marginals	12	34	10.5	0.319	2.21	0.0715	0.0639	0.0284
277	277	R_marginals	12	35	10.6	0.432	2.1	0.0544	-0.0839	0.00374
278	278	R_marginals	12	36	10.6	0.499	1.99	0.0807	0.0587	0.00541
279	279	R_marginals	12	37	10.6	0.515	1.87	-0.0358	0.0933	0.00289
280	280	R_marginals	12	38	10.5	0.489	1.75	-0.0729	0.0685	-0.00116
281	281	R_marginals	12	39	10.5	0.419	1.65	0.0732	0.0682	0.00125
282	282	R_marginals	12	40	10.4	0.432	1.52	-0.0204	0.0979	-0.00221
283	283	R_marginals	12	41	10.4	0.428	1.4	-0.00128	0.1	-0.00108
284	284	R_marginals	12	42	10.4	0.426	1.27	-0.00601	0.0998	-0.00207
285	285	R_marginals	12	43	10.3	0.416	1.14	0.0181	0.0979	-0.0093
286	286	R_marginals	12	44	10.3	0.417	1.04	0.0339	0.0939	-0.00507
287	287	R_marginals	12	45	10.3	0.424	0.943	0.00985	0.0995	-0.00298
288	288	R_marginals	12	46	10.2	0.43	0.845	0.0146	0.0988	0.00417
289	289	R_marginals	12	47	10.2	0.434	0.748	0.02	0.0977	-0.00662
290	290	R_marginals	12	48	10.1	0.441	0.652	0.0276	0.0961	-0.00042
291	291	R_marginals	12	49	10.1	0.446	0.558	0.031	0.0951	-0.00168
292	292	R_marginals	12	50	10.1	0.457	0.463	0.029	0.0951	-0.0111
293	293	R_marginals	12	51	10	0.467	0.37	0.0308	0.0951	-0.00152
294	294	R_marginals	12	52	9.96	0.475	0.276	0.0281	0.0958	-0.00516
295	295	R_marginals	12	53	9.91	0.484	0.183	0.0299	0.0953	-0.00402
296	296	R_marginals	12	54	9.86	0.491	0.0905	0.0265	0.0957	-0.0116
297	297	R_marginals	12	55	9.81	0.496	-0.00234	0.032	0.0945	-0.00678
298	298	R_marginals	12	56	9.76	0.506	-0.0959	0.0296	0.095	-0.00966
299	299	R_marginals	12	57	9.71	0.513	-0.19	0.0304	0.0952	-0.00263
300	300	R_marginals	12	58	9.66	0.525	-0.29	0.0332	0.0939	-0.00931
301	301	R_marginals	12	59	9.62	0.534	-0.391	0.0425	0.0899	-0.0105
302	302	R_marginals	12	60	9.57	0.537	-0.491	0.0395	0.0898	-0.0194
303	303	R_marginals	12	61	9.52	0.543	-0.591	0.0443	0.0896	-0.000894
304	304	R_marginals	12	62	9.49	0.575	-0.693	0.0417	0.0896	0.0151
305	305	R_marginals	12	63	9.45	0.596	-0.797	0.0332	0.0943	0.00123
306	306	R_marginals	12	64	9.41	0.611	-0.9	0.0367	0.093	-0.00289
307	307	R_marginals	12	65	9.37	0.623	-1	0.0375	0.0926	-0.00508
308	308	R_marginals	12	66	9.32	0.63	-1.1	0.0227	0.0969	-0.00943
309	309	R_marginals	12	67	9.26	0.634	-1.2	0.0306	0.0941	-0.0143
310	310	R_marginals	12	68	9.2	0.641	-1.29	0.0445	0.0874	-0.0196
311	311	R_marginals	12	69	9.14	0.649	-1.38	0.0525	0.0843	-0.0116
312	312	R_marginals	12	70	9.07	0.656	-1.47	0.0917	0.0388	-0.00947
313	313	R_marginals	12	71	9	0.666	-1.56	0.0749	0.046	-0.0476
314	314	R_marginals	12	72	8.91	0.678	-1.66	0.0542	0.0735	-0.0409
315	315	R_marginals	12	73	8.82	0.687	-1.76	0.0646	0.0559	-0.052
316	316	R_marginals	12	74	8.73	0.699	-1.86	0.0785	0.0124	-0.0607
317	317	R_marginals	12	75	8.63	0.71	-1.96	0.0595	0.0618	-0.0514
318	318	R_marginals	12	76	8.54	0.721	-2.06	0.0747	0.0426	-0.0509
319	319	R_marginals	12	77	8.45	0.733	-2.16	0.0773	-0.00486	-0.0633
320	320	R_marginals	12	78	8.35	0.745	-2.26	0.0897	0.0376	-0.0233
321	321	R_marginals	12	79	8.26	0.763	-2.36	0.0807	-0.0106	-0.0581
322	322	R_marginals	12	80	8.16	0.777	-2.46	0.0724	0.0421	-0.0547
323	323	R_marginals	12	81	8.07	0.798	-2.56	0.0514	0.0696	-0.0501
324	324	R_marginals	12	82	7.98	0.824	-2.65	0.0564	0.0702	-0.0435
325	325	R_marginals	12	83	7.88	0.851	-2.75	0.0775	0.0411	-0.0481
326	326	R_marginals	12	84	7.78	0.874	-2.84	0.0528	0.0728	-0.0437
327	327	R_marginals	12	85	7.68	0.905	-2.92	0.0382	0.0917	0.0118
328	328	R_marginals	12	86	7.58	0.942	-3	0.0209	0.0977	-0.00495
329	329	R_marginals	12	87	7.49	0.969	-3.07	0.0251	0.0962	0.0106
330	330	R_marginals	12	88	7.39	0.994	-3.15	0.0208	0.0977	-0.00378
331	331	R_marginals	12	89	7.28	1.01	-3.22	0.0136	0.097	-0.0204
332	332	R_marginals	12	90	7.18	1.02	-3.28	0.013	0.0987	-0.00959
333	333	R_marginals	12	91	7.07	1.02	-3.35	0.0145	0.098	-0.0139
334	334	R_marginals	12	92	6.96	1.03	-3.41	1.02e-05	0.0999	-0.004
335	335	R_marginals	12	93	6.85	1.03	-3.48	-0.00159	0.1	0.00032
336	336	R_marginals	12	94	6.74	1.04	-3.54	0.00281	0.0997	0.00737
337	337	R_marginals	12	95	6.63	1.04	-3.6	-0.000254	0.0999	0.00417
338	338	R_marginals	12	96	6.52	1.05	-3.66	0.0127	0.0988	-0.00831
339	339	R_marginals	12	97	6.41	1.06	-3.71	0.0157	0.098	-0.0124
340	340	R_marginals	12	98	6.29	1.07	-3.77	0.0132	0.0974	-0.0186
341	341	R_marginals	12	99	6.18	1.08	-3.82	0.0192	0.0963	-0.019
342	342	R_marginals	12	100	6.03	1.1	-3.89	0.0188	0.0944	-0.0273
343	343	R_marginals	12	101	5.87	1.11	-3.96	0.0315	0.0833	-0.0455
344	344	R_marginals	12	102	5.71	1.14	-4.02	0.0429	0.063	-0.0648
345	345	R_marginals	12	103	5.56	1.18	-4.09	0.0456	0.0484	-0.0747
346	346	R_marginals	12	104	5.41	1.22	-4.16	0.0477	0.0407	-0.0779
347	347	R_marginals	12	105	5.26	1.28	-4.23	0.0585	0.0342	-0.0735
348	348	R_marginals	12	106	5.11	1.31	-4.29	0.0472	0.0295	-0.083
349	349	R_marginals	12	107	4.95	1.35	-4.36	0.0473	0.0251	-0.0844
[truncated: 148,447 more rows]
